# Supplementary material for: Growth and Disparity: A Decade of U.S. Public School Construction.
Source: Royal Society of Chemistry journal article supplement (doi:10.1039/c0ob00982b), 2006-10-01
Supplement: c0ob00982b.pdf [file c0ob00982b.pdf]

## Electronic supplementary information (ESI).

### Synthesis of a Family of 3-Alkyl- or 3-Aryl-Substituted 1,2-Dihydroquinazolinium Salts and their Isomerization to 4-Iminium-1,2,3,4-Tetrahydroquinolines

José Vicente,\* María Teresa Chicote, Antonio Jesús Martínez-Martínez

*Grupo de Química Organometálica, Departamento de Química Inorgánica, Universidad de Murcia, Apartado 4021, 30071 Murcia, Spain*

Delia Bautista

SAI, Universidad de Murcia, Apartado  
4021, 30071 Murcia, Spain

Peter G. Jones

*Institut für Anorganische und Analytische Chemie der Technischen Universität Braunschweig, Postfach 23329, 38023, Braunschweig, Germany*

#### Contents:

##### Synthesis

. General experimental details: Page S2

| Compound  | Page      | Compound    | Page      | Compound   | Page       | Compound   | Page       | Compound   | Page       | Compound  | Page       |
|-----------|-----------|-------------|-----------|------------|------------|------------|------------|------------|------------|-----------|------------|
| <b>1a</b> | <b>S3</b> | <b>2c</b>   | <b>S5</b> | <b>3a2</b> | <b>S8</b>  | <b>3c1</b> | <b>S12</b> | <b>3d3</b> | <b>S16</b> | <b>5b</b> | <b>S21</b> |
| <b>1b</b> | <b>S3</b> | <b>2d</b>   | <b>S6</b> | <b>3a3</b> | <b>S9</b>  | <b>3c2</b> | <b>S13</b> | <b>3d4</b> | <b>S17</b> | <b>5d</b> | <b>S22</b> |
| <b>2a</b> | <b>S4</b> | <b>R-2e</b> | <b>S6</b> | <b>3b2</b> | <b>S10</b> | <b>3c4</b> | <b>S14</b> | <b>3e2</b> | <b>S18</b> |           |            |
| <b>2b</b> | <b>S4</b> | <b>3a1</b>  | <b>S7</b> | <b>3b3</b> | <b>S11</b> | <b>3d2</b> | <b>S15</b> | <b>3e4</b> | <b>S19</b> |           |            |

##### <sup>1</sup>H and <sup>13</sup>C{<sup>1</sup>H} NMR assignment

| Compound   | Page       | Compound   | Page       | Compound | Page       | Compound   | Page      | Compound   | Page       | Compound   | Page       |            |
|------------|------------|------------|------------|----------|------------|------------|-----------|------------|------------|------------|------------|------------|
| <b>3a1</b> | <b>S7</b>  | <b>3d5</b> | <b>S17</b> | <b>4</b> | <b>S24</b> | <b>S20</b> | <b>6d</b> | <b>S24</b> | <b>7d2</b> | <b>S25</b> | <b>7d5</b> | <b>S25</b> |
| <b>7e2</b> | <b>S26</b> |            |            |          |            |            |           |            |            |            |            |            |

**$^1\text{H} + ^{13}\text{C}$  NMR spectra of**

| Compound  | Page       | Compound    | Page       | Compound   | Page       | Compound   | Page       | Compound   | Page       | Compound   | Page       | Compound   | Page       |
|-----------|------------|-------------|------------|------------|------------|------------|------------|------------|------------|------------|------------|------------|------------|
| <b>1a</b> | <b>S27</b> | <b>2c</b>   | <b>S35</b> | <b>3a2</b> | <b>S43</b> | <b>3c1</b> | <b>S55</b> | <b>3d3</b> | <b>S63</b> | <b>3e4</b> | <b>S72</b> | <b>6d</b>  | <b>S84</b> |
| <b>1b</b> | <b>S29</b> | <b>2d</b>   | <b>S37</b> | <b>3a3</b> | <b>S49</b> | <b>3c2</b> | <b>S57</b> | <b>3d4</b> | <b>S65</b> | <b>4</b>   | <b>S74</b> | <b>7d2</b> | <b>S88</b> |
| <b>2a</b> | <b>S31</b> | <b>R-2e</b> | <b>S39</b> | <b>3b2</b> | <b>S51</b> | <b>3c4</b> | <b>S59</b> | <b>3d5</b> | <b>S67</b> | <b>5b</b>  | <b>S76</b> | <b>7d5</b> | <b>S90</b> |
| <b>2b</b> | <b>S33</b> | <b>3a1</b>  | <b>S41</b> | <b>3b3</b> | <b>S53</b> | <b>3d2</b> | <b>S61</b> | <b>3e2</b> | <b>S70</b> | <b>5d</b>  | <b>S80</b> | <b>7e2</b> | <b>S92</b> |

**X-ray Crystallography.**

Experimental details: Page **S94**

| Compound   | Page       | Compound   | Page        | Compound   | Page        | Compound  | Page        | Compound   | Page        |
|------------|------------|------------|-------------|------------|-------------|-----------|-------------|------------|-------------|
| <b>3a2</b> | <b>S95</b> | <b>3b3</b> | <b>S100</b> | <b>3d4</b> | <b>S104</b> | <b>6d</b> | <b>S109</b> | <b>7d2</b> | <b>S121</b> |

**Cyclic voltammetry** (Experimental details): **S126**

**References: S126**

=====  
**Experimental Section:**

*General.* When not stated, the reactions were carried out without precautions to exclude light or atmospheric oxygen or moisture. All compounds were dried first by suction and then under vacuum (1 mBar). Melting points were measured on a Reichert apparatus and are uncorrected. IR spectra were recorded on Nujol mulls between polyethylene sheets. The NMR assignments were performed, in some cases, with the help of APT, HMQC and HMBC experiments. The solvents were distilled before use. Although the syntheses of **1a**,<sup>1</sup> **1b**,<sup>1</sup> **2b**,<sup>2</sup> and **2d**<sup>3</sup> have been reported, we include them here because their characterization was incomplete.

**Synthesis of O<sub>2</sub>NC<sub>6</sub>H<sub>4</sub>CH=NR-2 (R = Xy (1a),<sup>1</sup> Tol (1b)).** A flask was charged with O<sub>2</sub>NC<sub>6</sub>H<sub>4</sub>CHO-2 (for **1a**, 6.14 g, 40.63 mmol; for **1b**, 3.68 g, 24.36 mmol), the appropriate amine (for **1a**, XyNH<sub>2</sub>, 5 mL, 40.60 mmol; for **1b**, TolNH<sub>2</sub>, 2.6 g, 24.36 mmol), toluene (40 mL), and activated 4 Å molecular sieves. The mixture was refluxed for 2 h, allowed to cool to room temperature and filtered. The yellow solution was concentrated in a rotary evaporator to dryness to give an oily material. After cooling at 0 °C, a yellow suspension formed, which was filtered and dried to give **1a**. In the case of **1b**, the residue was stirred with cold *n*-pentane (30 mL, 0 °C) for 15 min, the resulting suspension was filtered and the solid was washed with cold *n*-pentane (3 x 5 mL, 0 °C) and dried to give **1b** as a yellow solid.

**1a:** Yield: 10.04 g, 39.48 mmol, 97%. Mp: 55 °C (56–58 °C).<sup>1</sup>H NMR (300 MHz, CDCl<sub>3</sub>, 25 °C, TMS): δ 2.20 (s, 6 H, Me), 6.98 (dd, 1 H, *p*-Xy, <sup>3</sup>J<sub>HH</sub> = 8.4 Hz, <sup>3</sup>J<sub>HH</sub> = 6.6 Hz), 7.07 (d, 2 H, *m*-Xy, <sup>3</sup>J<sub>HH</sub> = 7.5 Hz), 7.62 (ddd, 1 H, H<sup>4</sup>, <sup>3</sup>J<sub>HH</sub> = 8.6 Hz, <sup>3</sup>J<sub>HH</sub> = 7.8 Hz, <sup>4</sup>J<sub>HH</sub> = 1.5 Hz), 7.75 (“dt”, 1 H, H<sup>5</sup>, <sup>3</sup>J<sub>HH</sub> = 7.5 Hz, <sup>4</sup>J<sub>HH</sub> = 0.6 Hz), 8.07 (dd, 1 H, H<sup>3</sup>, <sup>3</sup>J<sub>HH</sub> = 8.1 Hz, <sup>4</sup>J<sub>HH</sub> = 0.9 Hz), 8.31 (dd, 1 H, H<sup>6</sup>, <sup>3</sup>J<sub>HH</sub> = 7.8 Hz, <sup>4</sup>J<sub>HH</sub> = 1.5 Hz), 8.63 (s, 1 H, H<sup>7</sup>). <sup>13</sup>C{<sup>1</sup>H} NMR (75.5 MHz, CDCl<sub>3</sub>, 25 °C, TMS): δ 18.2 (Me), 124.2 (CH<sup>*p*-Xy</sup>), 124.4 (CH<sup>3</sup>), 126.9 (C<sup>*o*-Xy</sup>), 128.1 (CH<sup>*m*-Xy</sup>), 129.5 (CH<sup>6</sup>), 131.1 (C<sup>1</sup>), 131.2 (CH<sup>4</sup>), 133.7 (CH<sup>5</sup>), 149.1 (C<sup>2</sup>), 150.3 (C<sup>*i*-Xy</sup>), 158.8 (CH<sup>7</sup>). IR (Nujol, cm<sup>-1</sup>): ν(C=N + C=C) 1626, 1608, 1591, 1571; ν<sub>asym</sub>NO<sub>2</sub> 1526. HRMS (ESI) *m/z* calcd for C<sub>15</sub>H<sub>15</sub>N<sub>2</sub>O<sub>2</sub> [M + H]<sup>+</sup>, 255.1128; found 255.1128. Anal. calcd for C<sub>15</sub>H<sub>14</sub>N<sub>2</sub>O<sub>2</sub>: C, 70.85; H, 5.55; N, 11.02. Found: C, 70.61; H, 5.55; N, 11.09.

**1b:** Yield: 5.01 g, 20.81 mmol, 85%. Mp: 73 °C (71-72 °C).<sup>1</sup>H NMR (400 MHz, CDCl<sub>3</sub>, 25 °C, TMS): δ 2.37 (s, 3 H, Me), 7.20 (sr s, 4 H,

Tol), 7.57 (“dt”, 1 H, H<sup>4</sup>, <sup>3</sup>J<sub>HH</sub> = 8.4 Hz, <sup>4</sup>J<sub>HH</sub> = 1.2 Hz), 7.70 (t, 1 H, H<sup>5</sup>, <sup>3</sup>J<sub>HH</sub> = 7.6 Hz), 8.03 (dd, 1 H, H<sup>3</sup>, <sup>3</sup>J<sub>HH</sub> = 8.4 Hz, <sup>4</sup>J<sub>HH</sub> = 1.2 Hz), 8.28 (dd, 1 H, H<sup>6</sup>, <sup>3</sup>J<sub>HH</sub> = 7.8 Hz, <sup>4</sup>J<sub>HH</sub> = 1.4 Hz), 8.93 (s, 1 H, H<sup>7</sup>). <sup>13</sup>C{<sup>1</sup>H} NMR (100.8 MHz, CDCl<sub>3</sub>, 25 °C, TMS): δ 21.0 (Me), 121.1 (CH<sup>o-Tol</sup>), 124.4 (CH<sup>3</sup>), 129.6 (CH<sup>6</sup>), 129.8 (CH<sup>m-Tol</sup>), 130.9 (CH<sup>4</sup>), 131.1 (C<sup>1</sup>), 133.4 (CH<sup>5</sup>), 136.9 (C<sup>p-Tol</sup>), 148.4 (C<sup>i-Tol</sup>), 149.2 (C<sup>2</sup>), 154.7 (CH<sup>7</sup>). IR (Nujol, cm<sup>-1</sup>): ν(C=N + C=C) + ν<sub>asym</sub>NO<sub>2</sub> 1616, 1605, 1567, 1516. HRMS (ESI) *m/z* calcd for C<sub>14</sub>H<sub>13</sub>N<sub>2</sub>O<sub>2</sub> [M + H]<sup>+</sup>, 241.0972; found 241.0974. Anal. calcd for C<sub>14</sub>H<sub>12</sub>N<sub>2</sub>O<sub>2</sub>: C, 69.99; H, 5.03; N, 11.66. Found: C, 69.66; H, 4.82; N, 11.56.

**Synthesis of H<sub>2</sub>NC<sub>6</sub>H<sub>4</sub>CH=NR-2 (R = Xy (2a), Tol (2b)<sup>2</sup>).** To a boiling solution of the appropriate nitro-derivative (for **2a**: **1a**, 3 g, 11.75 mmol; for **2b**: **1b**, 3 g, 12.49 mmol) in ethanol (60 mL) was added Na<sub>2</sub>S·9H<sub>2</sub>O (for **2a**, 6.23 g, 25.94 mmol; for **2b**, 6.6 g, 27.49 mmol). After a few minutes, a vigorous reaction occurred and the heating was maintained for 15 min. The mixture was immediately concentrated under vacuum to dryness to give a dark brown oily residue, which was extracted with Et<sub>2</sub>O (3 x 30 mL); the combined extracts were filtered through a short pad of Celite and the solution was concentrated under vacuum to dryness. This procedure yielded **2a**·0.3H<sub>2</sub>O as an orange viscous oil. In the case of **2b** a solid formed, which was stirred with cold *n*-pentane (20 mL, 0 °C) for 30 min. The resulting suspension was filtered, the solid collected was washed with cold *n*-pentane (3 x 5 mL, 0 °C) and dried by suction to give **2b**·0.1H<sub>2</sub>O as a yellow solid

**2a**·0.3H<sub>2</sub>O: Yield: 2.63 g, 11.45 mmol, 97%. <sup>1</sup>H NMR (400 MHz, CDCl<sub>3</sub>, 25 °C, TMS): δ 1.80 (vb s, 0.6 H, H<sub>2</sub>O), 2.16 (s, 6 H, Me), 6.49 (s br, 2 H, NH<sub>2</sub>), 6.71 (m, 2 H, H<sup>3+5</sup>), 6.95 (t, 1 H, *p*-Xy, <sup>3</sup>J<sub>HH</sub> = 7.6 Hz), 7.07 (d, 2 H, *m*-Xy, <sup>3</sup>J<sub>HH</sub> = 7.6 Hz), 7.22 (m, 2 H, H<sup>4+6</sup>), 8.24 (s, 1 H, H<sup>7</sup>). <sup>13</sup>C{<sup>1</sup>H} NMR (75.4 MHz, CDCl<sub>3</sub>, 25 °C, TMS): δ 18.4 (Me), 115.7 (CH<sup>3</sup>), 115.9 (CH<sup>5</sup>), 117.2 (C<sup>1</sup>), 123.6 (CH<sup>p-Xy</sup>), 127.4 (C<sup>o-Xy</sup>), 128.0

(CH<sup>m-Xy</sup>), 131.7 (CH<sup>4</sup>), 134.1 (CH<sup>6</sup>), 148.8 (C<sup>2</sup>), 151.0 (C<sup>i-Xy</sup>), 165.7 (CH<sup>7</sup>). IR (cm<sup>-1</sup>):  $\nu(\text{NH})$  3459, 3279;  $\nu(\text{C}=\text{N} + \text{C}=\text{C})$  1625, 1585, 1556. HRMS (ESI)  $m/z$  calcd for C<sub>15</sub>H<sub>17</sub>N<sub>2</sub> [M + H]<sup>+</sup>, 225.1386; found 225.1385. Anal. calcd for C<sub>15</sub>H<sub>16</sub>N<sub>2</sub>·0.3H<sub>2</sub>O: C, 78.43; H, 7.28; N, 12.20. Found: C, 78.27; H, 6.95; N, 12.26.

**2b**·0.1H<sub>2</sub>O: Yield: 1.89 g, 8.91 mmol, 72%. Mp: 90 °C (dec) (69-70 °C).<sup>2</sup> <sup>1</sup>H NMR (400 MHz, CDCl<sub>3</sub>, 25 °C, TMS):  $\delta$  1.54 (s br, 0.2 H, H<sub>2</sub>O), 2.37 (s, 3 H, Me), 6.53 (s br, 2 H, NH<sub>2</sub>), 6.72 (m, 2 H, H<sup>3+5</sup>), 7.11 (d, 2 H, *o*-Tol, <sup>3</sup>J<sub>HH</sub> = 8.0 Hz), 7.20 (m, 3 H, *m*-Tol + H<sup>4</sup>), 7.32 (dd, 1 H, H<sup>6</sup>, <sup>3</sup>J<sub>HH</sub> = 7.6 Hz, <sup>4</sup>J<sub>HH</sub> = 1.6 Hz), 8.53 (s, 1 H, H<sup>7</sup>). <sup>13</sup>C {<sup>1</sup>H} NMR (100.8 MHz, CDCl<sub>3</sub>, 25 °C, TMS):  $\delta$  20.9 (Me), 115.7 (CH<sup>3</sup>), 116.2 (CH<sup>5</sup>), 117.8 (C<sup>1</sup>) 120.8 (CH<sup>*o*-Tol</sup>), 129.7 (CH<sup>*m*-Tol</sup>), 131.6 (CH<sup>4</sup>), 134.2 (CH<sup>6</sup>), 135.3 (C<sup>*p*-Tol</sup>), 148.7 (C<sup>2</sup>), 149.3 (C<sup>*i*-Tol</sup>), 162.4 (CH<sup>7</sup>). IR (Nujol, cm<sup>-1</sup>):  $\nu(\text{NH})$  3446, 3256;  $\nu(\text{C}=\text{N} + \text{C}=\text{C})$  1623, 1583, 1551, 1518, 1505. HRMS (ESI)  $m/z$  calcd for C<sub>14</sub>H<sub>15</sub>N<sub>2</sub> [M + H]<sup>+</sup>, 211.1230; found 211.1230. Anal. calcd for C<sub>14</sub>H<sub>14</sub>N<sub>2</sub>·0.1H<sub>2</sub>O: C, 79.29; H, 6.75; N, 13.21. Found: C, 78.99; H, 6.75; N, 13.21.

**Synthesis of H<sub>2</sub>NC<sub>6</sub>H<sub>4</sub>CH=NCy-2 (2c).** H<sub>2</sub>NC<sub>6</sub>H<sub>4</sub>CHO-2<sup>4</sup> (500 mg, 4.16 mmol), CyNH<sub>2</sub> (3.5 mL, 30.6 mmol), and *p*-toluenesulfonic acid (TSA, 80 mg, 0.42 mmol) were refluxed in toluene (80 mL) in a Dean-Stark apparatus for 14 h. The resulting solution was concentrated in a rotary evaporator to give a brown oily residue, which was treated with Et<sub>2</sub>O (100 mL). The white suspension obtained was filtered and the solution was concentrated under vacuum to give an oily residue, which was treated with Et<sub>2</sub>O (20 mL) and concentrated under vacuum to dryness. After repeating this procedure three times in order to remove residual amounts of CyNH<sub>2</sub>, a pale brown solid formed, which was dried under vacuum for 8 h. Yield: 693.7 mg, 3.43 mmol, 82%. Mp: 59 °C. <sup>1</sup>H NMR (300 MHz, CDCl<sub>3</sub>, 25 °C, TMS):  $\delta$  1.26-1.67 (various m, 6 H,

CH<sub>2</sub><sup>Cy</sup>), 1.74-1.83 (m, 4 H, CH<sub>2</sub><sup>Cy</sup>), 3.10 (m, 1 H, CH<sup>Cy</sup>), 6.41 (s br, 2 H, NH<sub>2</sub>), 6.66 (m, 2 H, H<sup>3+5</sup>), 7.11 (“dt”, 1 H, H<sup>4</sup>, <sup>3</sup>J<sub>HH</sub> = 8.4 Hz, <sup>4</sup>J<sub>HH</sub> = 1.5 Hz), 7.18 (dd, 1 H, H<sup>6</sup>, <sup>3</sup>J<sub>HH</sub> = 7.5 Hz, <sup>4</sup>J<sub>HH</sub> = 1.2 Hz), 8.35 (s, 1 H, H<sup>7</sup>). <sup>13</sup>C{<sup>1</sup>H} NMR (75.5 MHz, CDCl<sub>3</sub>, 25 °C, TMS): δ 24.6 (CH<sub>2</sub><sup>Cy</sup>), 25.7 (CH<sub>2</sub><sup>Cy</sup>), 34.8 (2 x CH<sub>2</sub><sup>Cy</sup>), 69.8 (CH<sup>Cy</sup>), 115.4 (CH<sup>3</sup>), 115.9 (CH<sup>5</sup>), 117.9 (C<sup>1</sup>), 130.4 (CH<sup>4</sup>), 133.1 (CH<sup>6</sup>), 148.4 (C<sup>2</sup>), 161.3 (CH<sup>7</sup>). IR (Nujol, cm<sup>-1</sup>): ν(NH) 3486, 3256, ν(C=N + C=C) 1632, 1609, 1589, 1557. HRMS (ESI) *m/z* calcd for C<sub>13</sub>H<sub>19</sub>N<sub>2</sub> [M + H]<sup>+</sup>, 203.1543; found 203.1545. Anal. calcd for C<sub>13</sub>H<sub>18</sub>N<sub>2</sub>: C, 77.18; H, 8.97; N, 13.85. Found: C, 77.44; H, 9.20; N, 13.77.

**Synthesis of H<sub>2</sub>NC<sub>6</sub>H<sub>4</sub>{C(Me)=NCy}-2 (2d).**<sup>3</sup> H<sub>2</sub>NC<sub>6</sub>H<sub>4</sub>C(O)Me-2 (2.50 g, 18.52 mmol), CyNH<sub>2</sub> (15.75 mL, 138 mmol), toluene (25 mL), and activated 4 Å molecular sieves were mixed in a Carius tube, which was sealed and heated at 100 °C for 4 days. The reaction mixture was allowed to cool and filtered through a short pad of Celite. The solution was concentrated under vacuum to dryness, the residue was dissolved in hot *n*-pentane (30 mL, 36 °C), filtered through a short pad of Celite, concentrated under vacuum (15 mL) and cooled at 0 °C. The resulting suspension was filtered and the solid collected was washed with cold *n*-pentane (3 x 5 mL, -33 °C) and dried to give **2d**·0.1H<sub>2</sub>O as a white crystalline solid. Yield: 3.78 g, 17.47 mmol, 94% (63%)<sup>3</sup>. Mp: 94 °C. <sup>1</sup>H and <sup>13</sup>C{<sup>1</sup>H} NMR.<sup>3</sup> IR (Nujol, cm<sup>-1</sup>): ν(NH) 3341, 3182; ν(C=N + C=C) 1620, 1574. HRMS (ESI) *m/z* calcd for C<sub>14</sub>H<sub>21</sub>N<sub>2</sub> [M + H]<sup>+</sup>, 217.1699; found 217.1702. Anal. calcd for C<sub>14</sub>H<sub>21</sub>N<sub>2</sub>O·0.1H<sub>2</sub>O: C, 77.09; H, 9.33; N, 12.84. Found: C, 77.09; H, 9.15; N, 12.97.

**Synthesis of R-H<sub>2</sub>NC<sub>6</sub>H<sub>4</sub>C(Me)=NCH(Me)Ph-2 (R-2e).** A mixture of H<sub>2</sub>NC<sub>6</sub>H<sub>4</sub>C(O)Me-2 (2.2 g, 16.28 mmol), (R)-(+)-PhCH(Me)NH<sub>2</sub> (10 mL, 78.64 mmol), activated 4 Å molecular sieves and toluene (10 mL) was heated in a Carius tube at 110 °C for 2 days. The reaction mixture

was allowed to cool, filtered through a short pad of Celite, and the orange solution was concentrated under vacuum to dryness. The oily residue was washed with cold *n*-pentane (4 x 30 mL,  $-78\text{ }^{\circ}\text{C}$ ) giving a pale brown solid, which was dissolved in *n*-pentane and crystallized upon cooling to  $-34\text{ }^{\circ}\text{C}$  to give **R-2e** as white needles. Yield: 1.966 g, 8.25 mmol, 51%. Mp:  $35\text{ }^{\circ}\text{C}$ .  $^1\text{H}$  NMR (400 MHz,  $\text{CDCl}_3$ ,  $25\text{ }^{\circ}\text{C}$ , TMS):  $\delta$  1.56 (d, 3 H, *Me*CHPh,  $^3J_{\text{HH}} = 6.4\text{ Hz}$ ), 2.26 (s, 3 H,  $\text{Me}^7$ ), 4.88 (q, 1 H, *CH*(Me)Ph,  $^3J_{\text{HH}} = 6.4\text{ Hz}$ ), 6.60 (br s, 2 H,  $\text{NH}_2$ ), 6.62-6.65 (m, 2 H,  $\text{H}^{3+5}$ ), 7.09 (“dt”, 1 H,  $\text{H}^4$ ,  $^3J_{\text{HH}} = 7.2\text{ Hz}$ ,  $^4J_{\text{HH}} = 1.6\text{ Hz}$ ), 7.21 (m, 1 H, *p*-Ph), 7.31 (m, 2 H,  $\text{Ph}^m$ ), 7.38 (m, 2 H,  $\text{Ph}^o$ ), 7.46 (dd, 1 H,  $\text{H}^6$ ,  $^3J_{\text{HH}} = 8.4\text{ Hz}$ ,  $^4J_{\text{HH}} = 1.6\text{ Hz}$ ).  $^{13}\text{C}\{^1\text{H}\}$  NMR (400 MHz,  $\text{CDCl}_3$ ,  $2\text{ }^{\circ}\text{C}$ , TMS):  $\delta$  16.2 ( $\text{Me}^7$ ), 25.5 (*Me*CHPh), 59.8 (*CH*(Me)Ph), 115.8 ( $\text{CH}^3$  or  $^5$ ), 116.9 ( $\text{CH}^3$  or  $^5$ ), 121.2 ( $\text{C}^1$ ), 126.5 ( $\text{CH}^{o+p\text{-Ph}}$ ), 128.4 ( $\text{CH}^{m\text{-Ph}}$ ), 129.4 ( $\text{CH}^6$ ), 130.0 ( $\text{CH}^4$ ), 146.0 ( $\text{C}^{i\text{-Ph}}$ ), 148.3 ( $\text{C}^2$ ), 166.7 ( $\text{C}^7$ ). IR (Nujol,  $\text{cm}^{-1}$ ):  $\nu(\text{NH})$  3475, 3208,  $\nu(\text{C}=\text{N} + \text{C}=\text{C})$  1615, 1574, 1543. HRMS (ESI)  $m/z$  calcd for  $\text{C}_{16}\text{H}_{19}\text{N}_2$  [ $\text{M} + \text{H}$ ] $^+$ , 239.1543; found 239.1545. Anal. calcd for  $\text{C}_{16}\text{H}_{18}\text{N}_2$ : C, 80.63; H, 7.61; N, 11.75. Found: C, 80.31; H, 7.60; N, 11.82.

### Synthesis of 1,2-Dihydroquinazolinium Triflates:

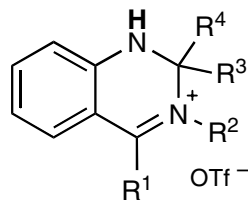

$^1\text{H}$  and  $^{13}\text{C}\{^1\text{H}\}$  NMR assignment for **3a1** ( $\text{R}^1 = \text{H}$ ,  $\text{R}^2 = \text{Xy}$ ,  $\text{R}^3 = \text{R}^4 = \text{Me}$ ):  $^1\text{H}$  NMR (400 MHz,  $\text{CDCl}_3$ ,  $25\text{ }^{\circ}\text{C}$ , TMS):  $\delta$  1.67 (s, 6 H,

$Me_2C$ ), 2.29 (s, 6 H,  $Me^{Xy}$ ), 6.91 (“dt”, 1 H,  $H^6$ ,  $^3J_{HH} = 8.0$  Hz,  $^4J_{HH} = 0.4$  Hz), 7.21 (d, 2 H,  $^3J_{HH} = 7.6$  Hz,  $m-Xy$ ), 7.32 (m, 2 H,  $p-Xy + H^8$ ) 7.59 (ddd, 1 H,  $H^7$ ,  $^3J_{HH} = 8.0$  Hz,  $^3J_{HH} = 7.2$  Hz,  $^4J_{HH} = 1.6$  Hz), 7.64 (d, 1 H,  $H^5$ ,  $^3J_{HH} = 8.0$  Hz), 8.28 (s, 1 H,  $H^4$ ), 8.45 (br s, 1 H, NH).  $^{13}C\{^1H\}$  NMR (400 MHz,  $CDCl_3$ , 25 °C, TMS):  $\delta$  18.6 ( $Me^{Xy}$ ), 24.3 ( $Me_2C$ ), 75.9 ( $C^2$ ), 114.9 ( $C^{4a}$ ), 117.0 ( $CH^8$ ), 120.3 (q,  $^1J_{CF} = 320$  Hz, OTf), 121.8 ( $CH^6$ ), 129.6 ( $CH^{m-Xy}$ ), 130.3 ( $C^{p-Xy}$ ) 132.7 ( $CH^5$ ), 134.9 ( $C^{o-Xy}$ ), 138.6 ( $C^{i-Xy}$ ), 141.3 ( $CH^7$ ), 147.9 ( $C^{8a}$ ), 160.5 ( $CH^4$ ).

**3a2** ( $R^1 = H$ ,  $R^2 = Xy$ ,  $R^3 = Tol$ ,  $R^4 = H$ ): Reagents, **2a** (218 mg, 0.97 mmol), TolCHO (140  $\mu$ L, 1.18 mmol) and HOTf (86  $\mu$ L, 0.99 mmol, added with 20 min delay). The resulting solution was stirred for 8 h and concentrated under vacuum to dryness to give an oily residue, which was washed with a 1:20 mixture of  $CH_2Cl_2$  and  $Et_2O$  (21 mL), dissolved in  $CHCl_3$  (2 mL) and filtered through a short pad of anhydrous  $MgSO_4$ . The solution was slowly added dropwise to a cold mixture of *n*-pentane and  $Et_2O$  (1:2, 60 mL, 0 °C) with stirring. The suspension was stirred for 15 min at 0 °C, filtered, and the solid collected was dried first by suction and then under vacuum (6 h) to give **3a2**·0.6 $CHCl_3$  as an orange solid. Yield: 228.3 mg, 0.48 mmol, 49%. Mp: 74 °C.  $^1H$  NMR (400 MHz,  $CDCl_3$ , -35 °C, TMS):  $\delta$  1.54 (s, 3 H,  $Me^{Xy}$ ), 2.33 (s, 3 H,  $Me^{Tol}$ ), 2.52 (s, 3 H,  $Me^{Xy}$ ), 6.45 (d, 1 H,  $H^2$ ,  $^3J_{HH} = 4.0$  Hz), 6.86 (t, 1 H,  $H^6$ ,  $^3J_{HH} = 7.6$  Hz), 7.07 (m, 6 H,  $o- + m-Tol + m-Xy + H^8$ ), 7.22 (d, 1 H,  $m-Xy$ ,  $^3J_{HH} = 7.2$  Hz), 7.30 (t, 1 H,  $p-Xy$ ,  $^3J_{HH} = 7.6$  Hz), 7.55 (d, 1 H,  $H^5$ ,  $^3J_{HH} = 8.0$  Hz), 7.62 (“dt”, 1 H,  $H^7$ ,  $^3J_{HH} = 7.6$  Hz,  $^4J_{HH} = 0.8$  Hz), 8.24 (s, 1 H,  $H^4$ ), 8.31 (d br, 1 H, NH,  $^3J_{HH} = 4.0$  Hz).  $^1H$  NMR (400 MHz,  $CDCl_3$ , 25 °C, TMS):  $\delta$  2.30 (s, 3 H,  $Me^{Tol}$ ), 6.43 (d, 1 H,  $H^2$ ,  $^3J_{HH} = 3.6$  Hz), 6.83 (“dt”, 1 H,  $H^6$ ,  $^3J_{HH} = 7.6$  Hz,  $^4J_{HH} = 0.4$  Hz), 7.01-7.11 (m, 7 H,  $H^8 + o- + m-Tol + m-Xy$ ), 7.26 (t, 1 H,  $p-Xy$ ,  $^3J_{HH} = 7.6$  Hz), 7.54 (d, 1 H,  $H^5$ ,  $^3J_{HH} = 9.2$  Hz), 7.58 (ddd, 1 H,  $H^7$ ,  $^3J_{HH} = 8.4$  Hz,  $^3J_{HH} = 6.8$  Hz,  $^4J_{HH} = 1.2$  Hz), 8.27 (s, 1 H,  $H^4$ ), 8.33 (d br, 1 H, NH,  $^3J_{HH} = 3.6$



Hz).  $^1\text{H}$  NMR (400 MHz,  $\text{CDCl}_3$ , 55 °C, TMS):  $\delta$  2.05 (s br, 6 H,  $\text{Me}^{\text{Xy}}$ ), 2.30 (s, 3 H,  $\text{Me}^{\text{Tol}}$ ), 6.45 (s, 1 H,  $\text{H}^2$ ), 6.82 (t, 1 H,  $\text{H}^6$ ,  $^3J_{\text{HH}} = 7.6$  Hz), 7.03-7.14 (m, 7 H,  $\text{H}^8 + o\text{-} + m\text{-Tol} + m\text{-Xy}$ ), 7.25 (t, 1 H,  $p\text{-Xy}$ ,  $^3J_{\text{HH}} = 7.6$  Hz), 7.51 (d, 1 H,  $\text{H}^5$ ,  $^3J_{\text{HH}} = 8.0$  Hz), 7.57 (t, 1 H,  $\text{H}^7$ ,  $^3J_{\text{HH}} = 7.6$  Hz), 8.23 (s, 1 H,  $\text{H}^4$ ), 8.38 (s br, 1 H, NH).  $^{13}\text{C}\{^1\text{H}\}$  NMR (100.8 MHz,  $\text{CDCl}_3$ , -35 °C, TMS):  $\delta$  16.7 ( $\text{Me}^{\text{Xy}}$ ), 17.7 ( $\text{Me}^{\text{Xy}}$ ), 21.4 ( $\text{Me}^{\text{Tol}}$ ), 74.4 ( $\text{CH}^2$ ), 111.0 ( $\text{C}^{4\text{a}}$ ), 116.2 ( $\text{CH}^8$ ), 119.7 ( $\text{CH}^6$ ), 119.8 (q,  $^1J_{\text{CF}} = 319$  Hz,  $\text{CF}_3\text{SO}_3$ ), 126.0 ( $\text{CH}^{o\text{-Tol}}$ ), 129.4 ( $\text{CH}^{m\text{-Xy}}$ ), 129.5 ( $\text{CH}^{m\text{-Xy}}$ ), 129.7 ( $\text{CH}^{m\text{-Tol}}$ ), 130.2 ( $\text{CH}^{p\text{-Xy}}$ ), 132.0 ( $\text{C}^{o\text{-Xy}}$ ), 132.5 ( $\text{C}^{p\text{-Tol}}$ ), 133.1 ( $\text{CH}^5$ ), 134.8 ( $\text{C}^{o\text{-Xy}}$ ), 138.5 ( $\text{C}^{i\text{-Xy}}$ ), 141.4 ( $\text{C}^{i\text{-Tol}}$ ), 142.4 ( $\text{CH}^7$ ), 148.2 ( $\text{C}^{8\text{a}}$ ), 160.1 ( $\text{CH}^4$ ).  $^{13}\text{C}\{^1\text{H}\}$  NMR (100.8 MHz,  $\text{CDCl}_3$ , 25 °C, TMS):  $\delta$  17.5 (s v br,  $\text{Me}^{\text{Xy}}$ ), 21.3 ( $\text{Me}^{\text{Tol}}$ ), 75.2 ( $\text{CH}^2$ ), 111.6 ( $\text{C}^{4\text{a}}$ ), 116.2 ( $\text{CH}^8$ ), 120.0 ( $\text{CH}^6$ ), 120.3 (q,  $^1J_{\text{CF}} = 320$  Hz,  $\text{CF}_3\text{SO}_3$ ), 126.5 ( $\text{CH}^{o\text{-Tol}}$ ), 129.6 ( $\text{CH}^{m\text{-Xy}}$ ), 129.8 ( $\text{CH}^{m\text{-Tol}}$ ), 130.4 ( $\text{CH}^{p\text{-Xy}}$ ), 132.6 ( $\text{C}^{p\text{-Tol}}$ ), 133.1 ( $\text{CH}^5$ ), 139.0 ( $\text{C}^{i\text{-Tol}}$ ), 141.6 ( $\text{C}^{i\text{-Tol}}$ ), 142.4 ( $\text{CH}^7$ ), 148.7 ( $\text{C}^{8\text{a}}$ ), 160.6 ( $\text{CH}^4$ ).  $^{13}\text{C}\{^1\text{H}\}$  NMR (100.8 MHz,  $\text{CDCl}_3$ , 55 °C, TMS):  $\delta$  17.5 ( $\text{Me}^{\text{Xy}}$ ), 21.2 ( $\text{Me}^{\text{Tol}}$ ), 75.7 ( $\text{CH}^2$ ), 111.9 ( $\text{C}^{4\text{a}}$ ), 116.5 ( $\text{CH}^8$ ), 120.2 ( $\text{CH}^6$ ), 120.5 (q,  $^1J_{\text{CF}} = 320$  Hz,  $\text{CF}_3\text{SO}_3$ ), 126.7 ( $\text{CH}^{o\text{-Tol}}$ ), 129.6 ( $\text{CH}^{m\text{-Xy}}$ ), 129.9 ( $\text{CH}^{m\text{-Tol}}$ ), 130.5 ( $\text{CH}^{p\text{-Xy}}$ ), 132.7 ( $\text{C}^{p\text{-Tol}}$ ), 133.1 ( $\text{CH}^5$ ), 134.0 ( $\text{C}^{o\text{-Xy}}$ ), 139.2 ( $\text{C}^{i\text{-Xy}}$ ), 141.7 ( $\text{C}^{i\text{-Tol}}$ ), 142.5 ( $\text{CH}^7$ ), 149.0 ( $\text{C}^{8\text{a}}$ ), 160.8 ( $\text{CH}^4$ ). IR (Nujol,  $\text{cm}^{-1}$ ):  $\nu(\text{NH})$  3224, 3186,  $\nu(\text{C}=\text{N} + \text{C}=\text{C})$  1633, 1573, 1568, 1558. HRMS (ESI)  $m/z$  calcd for  $\text{C}_{23}\text{H}_{23}\text{N}_2 [\text{M}]^+$ , 327.2856; found 327.1862. Anal. calcd for  $\text{C}_{24}\text{H}_{23}\text{F}_3\text{N}_2\text{O}_3\text{S}\cdot 0.6\text{CHCl}_3$ : C, 53.90; H, 4.33; N, 5.11; S, 5.85. Found: C, 53.63; H, 4.10; N, 5.20; S, 5.86. Crystals of **3a2**· $\text{CHCl}_3$  suitable for an X-ray diffraction study were obtained by slow evaporation of a solution of the product in  $\text{CHCl}_3$ .

**3a3** ( $\text{R}^1 = \text{H}$ ,  $\text{R}^2 = \text{Xy}$ ,  $\text{R}^3 = \text{CH}(\text{Me})\text{Ph}$ ,  $\text{R}^4 = \text{H}$ ): Reagents, **2a** (400 mg, 1.74 mmol), *rac*- $\text{PhCH}(\text{Me})\text{CHO}$  (260  $\mu\text{L}$ , 1.92 mmol) and HOTf (160  $\mu\text{L}$ , 1.83 mmol, added with 20 min delay). The resulting solution was stirred overnight, filtered through anhydrous  $\text{MgSO}_4$  and

concentrated under vacuum to dryness giving an orange oily residue, which was washed first with a cold mixture of CH<sub>2</sub>Cl<sub>2</sub> and Et<sub>2</sub>O (1:20, 3 x 21 mL, 0 °C) and then with a cold mixture of CH<sub>2</sub>Cl<sub>2</sub> and *n*-pentane (1:20, 3 x 21 mL, 0 °C) and dried under vacuum for 6 h to give **3a3**·H<sub>2</sub>O as a dark orange solid consisting of a mixture of two isomers, D and d, in a 2.3:1 molar ratio. Yield: 587.3 mg, 1.15 mmol, 66%. Mp: 64 °C. <sup>1</sup>H NMR (300 MHz, CDCl<sub>3</sub>, -55 °C, TMS): δ 1.25 (d, 3 H, CHMePh<sup>d</sup>, <sup>3</sup>J<sub>HH</sub> = 5.4 Hz), 1.31 (d, 3 H, CHMePh<sup>D</sup>, <sup>3</sup>J<sub>HH</sub> = 6.9 Hz), 1.88 (s, 3 H, Me<sup>Xy, D</sup>), 2.38 (s, 6 H, Me<sup>Xy, d</sup>), 2.41 (s, 3 H, Me<sup>Xy, D</sup>), 2.54 (s, 2 H, H<sub>2</sub>O), 3.45 (m, 1H, CHMePh<sup>d</sup>), 3.52 (m, 1H, CHMePh<sup>D</sup>), 5.66 (m, 1 H, H<sup>2, d</sup>), 5.94 (dd, 1 H, H<sup>2, D</sup>, <sup>3</sup>J<sub>HH</sub> = 8.4 Hz, <sup>3</sup>J<sub>HH</sub> = 4.5 Hz), 6.64 (several m, 20 H, Xy<sup>D+d</sup> + Ph<sup>D+d</sup> + H<sup>6, D+d</sup>, H<sup>8, D+d</sup>), 7.59 (t, 1 H, <sup>3</sup>J<sub>HH</sub> = 7.8 Hz, H<sup>7, D+d</sup>), 7.67 (d, 1 H, <sup>3</sup>J<sub>HH</sub> = 8.1 Hz, H<sup>5, D+d</sup>), 8.00 (br s, 1 H, NH<sup>d</sup>), 8.28 (br d, 1 H, NH<sup>D</sup>, <sup>3</sup>J<sub>HH</sub> = 3.6 Hz), 8.32 (s, 2 H, H<sup>4, D+d</sup>). <sup>13</sup>C{<sup>1</sup>H} NMR (75.5 MHz, CDCl<sub>3</sub>, 25 °C, TMS): δ 17.1 (CHMePh<sup>D+d</sup>), 18.0 (Me<sup>Xy, D</sup>), 18.4 (Me<sup>Xy, d</sup>), 19.5 (Me<sup>Xy, d</sup>), 42.0 (CHMePh<sup>D</sup>), 44.1 (CHMePh<sup>d</sup>), 75.6 (CH<sup>2, D+d</sup>), 113.6 (C<sup>4a, D</sup>), 113.9 (C<sup>4a, d</sup>), 116.3 (CH<sup>8, d</sup>), 116.7 (CH<sup>8, D</sup>), 119.5 (q, CF<sub>3</sub>SO<sub>3</sub>, <sup>1</sup>J<sub>CF</sub> = 320 Hz), 120.1 (CH<sup>6, d</sup>), 120.6 (CH<sup>6, D</sup>), 125.0 (CH<sup>d</sup>), 127.4 (CH), 127.5 (CH), 128.6 (CH), 128.8 (CH), 129.2 (CH), 129.7 (CH), 130.2 (CH), 131.4 (Xy<sup>o, D</sup>), 131.8 (Xy<sup>o, d</sup>), 132.5 (CH<sup>5, d</sup>), 133.0 (CH<sup>5, D</sup>), 133.5 (Xy<sup>o, D</sup>), 139.1 (Xy<sup>i, D</sup>), 140.4 (Ph<sup>i, D</sup>), 141.7 (CH<sup>7, d</sup>), 141.9 (CH<sup>7, D</sup>), 147.5 (C<sup>8a, D</sup>), 148.1 (C<sup>8a, d</sup>), 160.7 (CH<sup>4, D+d</sup>). IR (Nujol, cm<sup>-1</sup>): ν(NH) 3234 br, ν(C=N + C=C) 1629, 1565, 1555. HRMS (ESI) *m/z* calcd for C<sub>24</sub>H<sub>23</sub>N<sub>2</sub> [M]<sup>+</sup>, 341.2012; found 341.2011. C<sub>25</sub>H<sub>25</sub>F<sub>3</sub>N<sub>2</sub>O<sub>3</sub>S·H<sub>2</sub>O: C, 59.04; H, 5.35; N, 5.51; S, 6.30. Found: C, 58.87; H, 5.10; N, 5.58; S, 6.67.

**3b2** (**R**<sup>1</sup> = **H**, **R**<sup>2</sup> = **Tol**, **R**<sup>3</sup> = **Tol**, **R**<sup>4</sup> = **H**): Reagents, **2b** (100 mg, 0.48 mmol), TolCHO (60 μL, 0.51 mmol) and HOTf (45 μL, 0.52 mmol, added with 20 min delay). After 3.5 h of stirring, the reaction mixture was filtered through a short pad of Celite and concentrated under

vacuum (2 mL). Cold Et<sub>2</sub>O was added (20 mL, 0 °C), the suspension was stirred for 15 min at 0 °C and filtered. The solid was dissolved in CHCl<sub>3</sub> (2 mL) and added dropwise to rapidly stirred cold Et<sub>2</sub>O (30 mL, 0 °C); the suspension was stirred for 15 min at 0 °C and filtered. The solid collected was washed with Et<sub>2</sub>O and dried first by suction and then under vacuum for 8 h to give **3b2**·0.5H<sub>2</sub>O as an orange solid. Yield: 132.0 mg, 0.2721 mmol, 58%. Mp: 177 °C. <sup>1</sup>H NMR (300 MHz, CDCl<sub>3</sub>, 25 °C, TMS): δ 1.56 (s br, 1 H, H<sub>2</sub>O), 2.28 (d, 3 H, Me), 2.37 (s, 3 H, Me), 6.76 (t, 1 H, H<sup>6</sup>, <sup>3</sup>J<sub>HH</sub> = 7.7 Hz), 6.99 (m, 2 H, H<sup>8</sup> + Tol), 7.00 (s, 1 H, H<sup>2</sup>), 7.11 (d, 2 H, *o/m*-Tol, <sup>3</sup>J<sub>HH</sub> = 8.1 Hz), 7.24-7.35 (m, 5 H, Tol), 7.43 (t, 1 H, H<sup>7</sup>, <sup>3</sup>J<sub>HH</sub> = 8.0 Hz), 7.56 (d, 1 H, H<sup>5</sup>, <sup>3</sup>J<sub>HH</sub> = 8.1 Hz), 8.59 (d br, 1 H, NH, <sup>3</sup>J<sub>HH</sub> = 3.9 Hz), 8.84 (s, 1 H, H<sup>4</sup>). <sup>13</sup>C{<sup>1</sup>H} NMR (75.5 MHz, CDCl<sub>3</sub>, 25 °C, TMS): δ 21.1 (Me), 21.2 (Me), 72.7 (CH<sup>2</sup>), 113.9 (C<sup>4a</sup>), 116.8 (CH<sup>8</sup>), 120.8 (CH<sup>6</sup>), 122.2 (*o/m*-Tol), 125.8 (*o/m*-Tol), 129.8 (*o/m*-Tol), 131.1 (CH<sup>*o/m*-Tol</sup>), 132.3 (C<sup>*p*-Tol</sup>), 132.7 (CH<sup>5</sup>), 138.9 (C<sup>*p*-Tol</sup>), 140.4 (C<sup>*i*-Tol</sup>), 141.4 (C<sup>*i*-Tol</sup>), 141.7 (CH<sup>7</sup>), 146.7 (C<sup>8a</sup>), 156.0 (CH<sup>4</sup>). IR (Nujol, cm<sup>-1</sup>): ν(NH) 3250, ν(C=N + C=C) 1628, 1600, 1564. HRMS (ESI) *m/z* calcd for C<sub>22</sub>H<sub>21</sub>N<sub>2</sub> [M]<sup>+</sup>, 313.1699; found 313.1703. Anal. calcd for C<sub>23</sub>H<sub>21</sub>F<sub>3</sub>N<sub>2</sub>O<sub>3</sub>S·0.5H<sub>2</sub>O: C, 58.59; H, 4.70; N, 5.94; S, 6.80. Found: C, 58.69; H, 4.70; N, 5.94; S, 6.80.

**3b3** (R<sup>1</sup> = H, R<sup>2</sup> = Tol, R<sup>3</sup> = CH(Me)Ph, R<sup>4</sup> = H): Reagents, **2b** (220 mg, 1.05 mmol), *Rac*-PhCH(Me)CHO (150 μL, 1.11 mmol) and HOTf (100 μL, 1.15 mmol). After 18 h of stirring, the reaction mixture was concentrated to dryness. The oily residue was extracted with a 1:30 mixture of CH<sub>2</sub>Cl<sub>2</sub> and Et<sub>2</sub>O (3 x 31 mL) and the combined extracts were concentrated under vacuum to *ca* 10 mL. The resulting suspension was stirred at 0 °C for 15 min, filtered, and the solid collected was washed with cold Et<sub>2</sub>O (3 x 3 mL, 0 °C) and dried, first by suction and then under vacuum (6 h) to give **3b3** as a red solid consisting of a mixture of two isomers, D and d, in a 2:1 molar ratio. Yield: 365.2 mg, 0.77 mmol, 73%.

Mp: 152 °C.  $^1\text{H}$  NMR (400 MHz,  $\text{CDCl}_3$ , 25 °C, TMS):  $\delta$  1.33 (d, 3 H,  $\text{CHMePh}^{\text{D}}$ ,  $^3J_{\text{HH}} = 7.2$  Hz), 1.36 (d, 3 H,  $\text{CHMePh}^{\text{d}}$ ,  $^3J_{\text{HH}} = 7.2$  Hz), 2.21 (s, 3 H,  $\text{Me}^{\text{Tol, D}}$ ), 2.40 (s, 3 H,  $\text{Me}^{\text{Tol, d}}$ ), 3.13 (m, 1 H,  $\text{CHMePh}^{\text{d}}$ ), 3.48 (m, 1 H,  $\text{CHMePh}^{\text{D}}$ ), 6.21 (m, 1 H,  $\text{H}^{2, \text{D}}$ ), 6.32 (m, 1 H,  $\text{H}^{2, \text{d}}$ ), 6.50 (t, 1 H,  $\text{H}^{6, \text{d}}$ ,  $^3J_{\text{HH}} = 7.4$  Hz), 6.79 (d, 1 H,  $\text{H}^{8, \text{d}}$ ,  $^3J_{\text{HH}} = 8.4$  Hz), 6.88-6.94 (m, 5 H,  $o$ - +  $m$ -Tol $^{\text{D}}$  +  $\text{H}^{6, \text{D}}$ ), 6.99-7.11 (various m, 6 H,  $o$ - +  $m$ - +  $p$ -Ph +  $\text{H}^{8, \text{D}}$  +  $\text{H}^{5, \text{d}}$ ), 7.32 (“dt”, 1 H,  $^3J_{\text{HH}} = 8.1$  Hz,  $^4J_{\text{HH}} = 1.2$  Hz,  $\text{H}^7$ , m), 7.37 (d, 2 H,  $^3J_{\text{HH}} = 8.4$  Hz,  $m$ -Tol $^{\text{d}}$ ), 7.56 (t, 1 H,  $\text{H}^{7, \text{D}}$ ,  $^3J_{\text{HH}} = 7.8$  Hz), 7.62 (d, 2 H,  $o$ -Tol $^{\text{d}}$ ,  $^3J_{\text{HH}} = 8.4$  Hz), 7.66 (d br, 1 H,  $\text{NH}^{\text{d}}$ ,  $^3J_{\text{HH}} = 5.2$  Hz), 7.72 (d, 1 H,  $\text{H}^{5, \text{D}}$ ,  $^3J_{\text{HH}} = 8.0$  Hz), 8.22 (d br, 1 H,  $\text{NH}^{\text{D}}$ ,  $^3J_{\text{HH}} = 4.8$  Hz), 8.39 (s, 1 H,  $\text{H}^{4, \text{d}}$ ), 8.54 (s, 1 H,  $\text{H}^{4, \text{D}}$ ).  $^{13}\text{C}\{^1\text{H}\}$  NMR (100.8 MHz,  $\text{CDCl}_3$ , 25 °C, TMS): 15.0 ( $\text{CHMePh}^{\text{d}}$ ), 16.9 ( $\text{CHMePh}^{\text{D}}$ ), 20.9 ( $\text{Me}^{\text{Tol, D}}$ ), 21.1 ( $\text{Me}^{\text{Tol, d}}$ ), 41.0 ( $\text{CHMePh}^{\text{D}}$ ), 43.8 ( $\text{CHMePh}^{\text{d}}$ ), 76.3 ( $\text{CH}^{2, \text{D+d}}$ ), 113.9 ( $\text{C}^{4\text{a, d}}$ ), 114.8 ( $\text{C}^{4\text{a, D}}$ ), 115.6 ( $\text{CH}^{8, \text{d}}$ ), 116.7 ( $\text{CH}^{8, \text{D}}$ ), 119.6 ( $\text{CH}^{6, \text{d}}$ ), 120.6 (q,  $^1J_{\text{CF}} = 319.6$  Hz,  $\text{CF}_3\text{SO}_3$ ), 120.7 ( $\text{CH}^{6, \text{D}}$ ), 122.2 ( $\text{C}^{o\text{-Tol, D}}$ ), 122.4 ( $\text{C}^{o\text{-Tol, d}}$ ), 127.7 ( $\text{CH}^{p\text{-Ph, D}}$ ), 127.9 ( $\text{CH}^{p\text{-Ph, d}}$ ), 128.0 ( $\text{CH}^{o\text{-Ph, D}}$ ), 128.5 ( $\text{CH}^{m\text{-Ph, d}}$ ), 128.7 ( $\text{CH}^{o\text{-Ph, d}}$ ), 128.8 ( $\text{CH}^{m\text{-Ph, D}}$ ), 130.4 ( $\text{CH}^{m\text{-Tol, D}}$ ), 133.1 ( $\text{CH}^{5, \text{D}}$ ), 131.5 ( $\text{CH}^{m\text{-Tol, d}}$ ), 132.6 ( $\text{CH}^{5, \text{d}}$ ), 138.0 ( $\text{C}^{i\text{-Ph, d}}$ ), 138.80 ( $\text{C}^{i\text{-C, D}}$ ), 138.85 ( $\text{C}^{p\text{-Tol, d}}$ ), 139.5 ( $\text{C}^{i\text{-Tol, D+d}}$ ), 141.1 ( $\text{CH}^{7, \text{D}}$ ), 141.2 ( $\text{CH}^{7, \text{d}}$ ), 146.3 ( $\text{C}^{8\text{a, D}}$ ), 148.3 ( $\text{C}^{8\text{a, d}}$ ), 157.0 ( $\text{CH}^{4, \text{D}}$ ), 158.3 ( $\text{CH}^{4, \text{d}}$ ). IR (Nujol,  $\text{cm}^{-1}$ ):  $\nu(\text{NH})$  3242,  $\nu(\text{C}=\text{N} + \text{C}=\text{C})$  1627, 1599, 1557. HRMS (ESI)  $m/z$  calcd for  $\text{C}_{23}\text{H}_{23}\text{N}_2$   $[\text{M}]^+$ , 327.1856; found 327.1859. Anal. calcd for  $\text{C}_{24}\text{H}_{23}\text{F}_3\text{N}_2\text{O}_3\text{S}$ : C, 60.49; H, 4.87; N, 6.01; S, 6.66. Found: C, 60.45; H, 4.66; N, 5.92; S, 6.26. Crystals of **3b3** suitable for an X-ray diffraction study were obtained by slow diffusion of *n*-pentane into a solution of the product in  $\text{CHCl}_3$ .

**3c1** ( $\text{R}^1 = \text{H}$ ,  $\text{R}^2 = \text{Cy}$ ,  $\text{R}^3 = \text{R}^4 = \text{Me}$ ): Reagents, **2c** (120 mg, 0.59 mmol),  $\text{Me}_2\text{CO}$  (10 mL) and HOTf (52  $\mu\text{L}$ , 0.60 mmol). The solution was stirred for 1.5 h and concentrated under vacuum to dryness. The yellow oily residue was washed with a 1:20 mixture of  $\text{CH}_2\text{Cl}_2$  and  $\text{Et}_2\text{O}$  (4

x 21 mL) and converted into a solid under vacuum. The solid was dissolved in CH<sub>2</sub>Cl<sub>2</sub> (1 mL) and a 10:20 mL mixture of Et<sub>2</sub>O/*n*-pentane (0 °C) was added. The suspension was stirred at 0 °C for 15 min, filtered and the solid collected was washed with *n*-pentane (3 x 5 mL, 0 °C), dried first by suction under a N<sub>2</sub> atmosphere and then under vacuum (6 h) to give **3c1** as a yellow solid, which must be stored below 4 °C. Yield: 164.5 mg, 0.42 mmol, 71 %. Dec.p: 86 °C. <sup>1</sup>H NMR (400 MHz, CDCl<sub>3</sub>, 25 °C, TMS): δ 1.31-1.48 (various m, 3 H, CH<sub>2</sub><sup>Cy</sup>), 1.62-1.82 (various m, 3 H, CH<sub>2</sub><sup>Cy</sup>), 1.78 (s, 6 H, Me<sub>2</sub>C), 1.94-2.06 (various m, 4 H, CH<sub>2</sub><sup>Cy</sup>), 3.68 (m, 1 H, CH<sup>Cy</sup>), 6.74 (t, 1 H, <sup>3</sup>J<sub>HH</sub> = 7.6 Hz, H<sup>6</sup>), 7.00 (d, 1 H, <sup>3</sup>J<sub>HH</sub> = 8.4 Hz, H<sup>8</sup>), 7.43 (“dt”, 1 H, <sup>3</sup>J<sub>HH</sub> = 7.6 Hz, <sup>4</sup>J<sub>HH</sub> = 1.2 Hz, H<sup>7</sup>), 7.49 (d, H<sup>5</sup>, <sup>3</sup>J<sub>HH</sub> = 8.4 Hz) 7.51 (s, NH), 8.50 (s, 1 H, H<sup>4</sup>). <sup>13</sup>C {<sup>1</sup>H} NMR (100.8 MHz, CDCl<sub>3</sub>, 25 °C, TMS): δ 24.1 (CH<sub>2</sub><sup>Cy</sup>), 24.4 (CH<sub>2</sub><sup>Cy</sup>), 25.6 (CH<sub>2</sub><sup>Cy</sup>), 25.7 (Me<sub>2</sub>C), 30.6 (CH<sub>2</sub><sup>Cy</sup>), 34.7 (CH<sub>2</sub><sup>Cy</sup>), 61.4 (CH<sup>Cy</sup>), 76.5 (C<sup>2</sup>), 112.0 (C<sup>4a</sup>), 116.5 (C<sup>8</sup>), 119.7 (C<sup>6</sup>), 132.1 (C<sup>5</sup>), 141.0 (C<sup>7</sup>), 147.2 (C<sup>8a</sup>), 157.8 (C<sup>4</sup>). IR (Nujol, cm<sup>-1</sup>): ν(NH) 3257, ν(C=N + C=C) 1643, 1633, 1581, 1574. HRMS (ESI) m/z calcd for C<sub>16</sub>H<sub>23</sub>N<sub>2</sub> [M]<sup>+</sup>, 243.1856; found 243.1858. The scarce stability of **3c1** in solution and in the solid state prevented to get good elemental analysis.

**3c2 (R<sup>1</sup> = H, R<sup>2</sup> = Cy, R<sup>3</sup> = Tol R<sup>4</sup> = H)**: Reagents, **2c** (135 mg, 0.67 mmol), TolCHO (80 μL, 0.68 mmol) and HOTf (60 μL, 0.69 mmol, added with 20 min delay). The solution was stirred for 21 h and concentrated to dryness; the oily residue was dissolved in CHCl<sub>3</sub> (3 mL), filtered through a short pad of anhydrous MgSO<sub>4</sub> and slowly added dropwise to a mixture of Et<sub>2</sub>O and *n*-pentane (20:40 mL) with stirring. The suspension was filtered and the solid collected was washed with *n*-pentane (3 x 5 mL) and dried under vacuum (6 h) to give **3c2**·0.7H<sub>2</sub>O as an orange solid. Yield: 214.8 mg, 0.47 mmol, 71%. Mp: 148 °C. <sup>1</sup>H NMR (400 MHz, CDCl<sub>3</sub>, 25 °C, TMS): δ 1.12-1.48 (various m, 4 H, CH<sub>2</sub><sup>Cy</sup>),

1.61 (s br, 1.5 H, H<sub>2</sub>O), 1.65 (m, 1 H, CH<sub>2</sub><sup>Cy</sup>), 1.81-1.94 (various m, 4 H, CH<sub>2</sub><sup>Cy</sup>), 2.18 (m, 1 H, CH<sub>2</sub><sup>Cy</sup>), 2.27 (s, 3 H, Me), 6.57 (d, 1 H, H<sup>2</sup>, <sup>3</sup>J<sub>HH</sub> = 4.4 Hz), 6.70 (t, 1 H, H<sup>6</sup>, <sup>3</sup>J<sub>HH</sub> = 7.6 Hz), 6.77 (d, 1 H, H<sup>8</sup>, <sup>3</sup>J<sub>HH</sub> = 8.4 Hz), 7.10 (d, 2 H, *m*-Tol, <sup>3</sup>J<sub>HH</sub> = 8.4 Hz), 7.31 (d, 2 H, *o*-Tol, <sup>3</sup>J<sub>HH</sub> = 8.4 Hz), 7.35 (ddd, 1 H, H<sup>7</sup>, <sup>3</sup>J<sub>HH</sub> = 8.4 Hz, <sup>3</sup>J<sub>HH</sub> = 7.2 Hz, <sup>4</sup>J<sub>HH</sub> = 1.2 Hz), 7.59 (d, 1 H, H<sup>5</sup>, <sup>3</sup>J<sub>HH</sub> = 8.0 Hz), 8.76 (d br, 1 H, NH, <sup>3</sup>J<sub>HH</sub> = 4.0 Hz), 8.97 (s, 1 H, H<sup>4</sup>). <sup>13</sup>C{<sup>1</sup>H} NMR (100.8 MHz, CDCl<sub>3</sub>, 25 °C, TMS): δ 21.1 (Me<sup>Tol</sup>), 24.1 (CH<sub>2</sub><sup>Cy</sup>), 25.1 (CH<sub>2</sub><sup>Cy</sup>), 31.8 (CH<sub>2</sub><sup>Cy</sup>), 32.6 (CH<sub>2</sub><sup>Cy</sup>), 67.6 (CH<sup>Cy</sup>), 69.9 (CH<sup>2</sup>), 113.0 (C<sup>4a</sup>), 116.0 (CH<sup>8</sup>), 119.0 (CH<sup>6</sup>), 120.5 (q, <sup>1</sup>J<sub>CF</sub> = 320 Hz, CF<sub>3</sub>SO<sub>3</sub>), 125.7 (CH<sup>*o*-Tol</sup>), 129.8 (CH<sup>*m*-Tol</sup>), 132.7 (CH<sup>5</sup>), 133.3 (C<sup>*p*-Tol</sup>), 140.3 (C<sup>*i*-Tol</sup>), 140.5 (CH<sup>7</sup>), 145.8 (C<sup>8a</sup>), 158.6 (CH<sup>4</sup>). IR (Nujol, cm<sup>-1</sup>): ν(NH) 3271, ν(C=N + C=C) 1633, 1614, 1574, 1577. HRMS (ESI) *m/z* calcd for C<sub>21</sub>H<sub>25</sub>N<sub>2</sub> [M]<sup>+</sup>, 305.2012; found 305.2018. Anal. calcd for C<sub>22</sub>H<sub>25</sub>F<sub>3</sub>N<sub>2</sub>O<sub>3</sub>S·0.7H<sub>2</sub>O: C, 56.57; H, 5.70; N, 6.00; S, 6.86. Found: C, 56.32; H, 5.45; N, 6.27; S, 6.81.

**3c4** (R<sup>1</sup> = H, R<sup>2</sup> = Cy, R<sup>3</sup> = Me, R<sup>4</sup> = H): Reagents, **2c** (120 mg, 0.59 mmol), MeCHO (0.1 mL, 1.77 mmol) and HOTf (52 μL, 0.60 mmol). After 3.5 h of stirring, the solution was concentrated under vacuum to dryness. The oily residue was washed with a cold mixture of CH<sub>2</sub>Cl<sub>2</sub> and Et<sub>2</sub>O (1:30, 31 mL), dissolved in CHCl<sub>3</sub> (1 mL), filtered through a short pad of anhydrous MgSO<sub>4</sub> and added dropwise to a cold mixture of Et<sub>2</sub>O and *n*-pentane (2:18 mL, 0 °C) to give a suspension. The mother liquor was decanted and the residue dried under vacuum for 6 h to give **3c4** as an orange solid. Yield: 160.3 mg, 0.42 mmol, 71%. Mp: 81 °C. <sup>1</sup>H NMR (400 MHz, CDCl<sub>3</sub>, 25 °C, TMS): δ 1.23-1.38 (m, 2 H, CH<sub>2</sub><sup>Cy</sup>), 1.43-1.58 (m, 2 H, CH<sub>2</sub><sup>Cy</sup>), 1.46 (d, 3 H Me, <sup>3</sup>J<sub>HH</sub> = 6.4 Hz), 1.70-2.24 (various m, 7 H, CH<sub>2</sub><sup>Cy</sup> + H<sub>2</sub>O), 3.78 (m, 1 H, CH<sup>Cy</sup>), 5.65 ("quint", 1 H, H<sup>2</sup>), 6.81 (t, 1 H, H<sup>6</sup>, <sup>3</sup>J<sub>HH</sub> = 7.4 Hz), 6.92 (d, 1 H, H<sup>8</sup>, <sup>3</sup>J<sub>HH</sub> = 8.4 Hz), 7.30 (d br, 1 H, NH, <sup>3</sup>J<sub>HH</sub> = 4.0 Hz), 7.47 ("dt", 1 H, H<sup>7</sup>, <sup>3</sup>J<sub>HH</sub>

= 7.8 Hz,  $^4J_{\text{HH}} = 1.2$  Hz), 7.56 (d, 1 H,  $\text{H}^5$ ,  $^3J_{\text{HH}} = 8.0$  Hz), 8.63 (s, 1 H,  $\text{H}^4$ ).  $^{13}\text{C}\{^1\text{H}\}$  NMR (100.8 MHz,  $\text{CDCl}_3$ , 25 °C, TMS):  $\delta$  18.5 (Me), 24.4 ( $\text{CH}_2^{\text{Cy}}$ ), 25.0 ( $\text{CH}_2^{\text{Cy}}$ ), 31.9 ( $\text{CH}_2^{\text{Cy}}$ ), 32.6 ( $\text{CH}_2^{\text{Cy}}$ ), 65.2 ( $\text{CH}^2$ ), 67.0 ( $\text{CH}^{\text{Cy}}$ ), 112.8 ( $\text{C}^{4\text{a}}$ ), 116.3 ( $\text{CH}^8$ ), 119.8 ( $\text{CH}^6$ ), 120.5 (q,  $^1J_{\text{CF}} = 320$  Hz,  $\text{CF}_3\text{SO}_3$ ), 132.7 ( $\text{CH}^5$ ), 140.3 ( $\text{CH}^7$ ), 146.1 ( $\text{C}^{8\text{a}}$ ), 157.2 ( $\text{CH}^4$ ). IR (Nujol,  $\text{cm}^{-1}$ ):  $\nu(\text{NH})$  3229,  $\nu(\text{C}=\text{N} + \text{C}=\text{C})$  1631, 1594, 1563. HRMS (ESI)  $m/z$  calcd for  $\text{C}_{15}\text{H}_{21}\text{N}_2$   $[\text{M}]^+$ , 230.1778; found 229.1703. Anal. calcd for  $\text{C}_{16}\text{H}_{21}\text{F}_3\text{N}_2\text{O}_{3.5}\text{S}$ : C, 49.60; H, 5.7; N, 7.23; S, 8.28. Found: C, 49.39; H, 5.58; N, 6.91; S, 7.96.

**3d2** ( $\text{R}^1 = \text{Me}$ ,  $\text{R}^2 = \text{Cy}$ ,  $\text{R}^3 = \text{Tol}$ ,  $\text{R}^4 = \text{H}$ ): Reagents, **2d** (200 mg, 0.92 mmol), TolCHO (110  $\mu\text{L}$ , 0.93 mmol) and HOTf (82  $\mu\text{L}$ , 0.94 mmol). After 18 h of stirring, the yellow solution was concentrated under vacuum to dryness. The oily residue was washed with a  $\text{CH}_2\text{Cl}_2/\text{Et}_2\text{O}$  mixture (1:20, 3 x 21 mL) and dried under vacuum for 8 h to give **3d2** $\cdot\text{H}_2\text{O}$  as a deep yellow solid, which must be stored below 4 °C. Yield: 376.8 mg, 0.80 mmol, 84%. Mp: 78 °C.  $^1\text{H}$  NMR (400 MHz,  $\text{CDCl}_3$ , 25 °C, TMS):  $\delta$  1.12-2.03 (several m, 12 H,  $\text{CH}_2^{\text{Cy}} + \text{H}_2\text{O}$ ), 2.23 (s, 3 H,  $\text{Me}^{\text{Tol}}$ ), 2.91 (s, 3 H,  $\text{Me}^4$ ), 4.37 (m, 1 H,  $\text{CH}^{\text{Cy}}$ ), 6.78 (t overlapped with s, 2 H,  $\text{H}^{2+6}$ ,  $^3J_{\text{HH}} = 7.6$  Hz), 6.94 (d, 1 H,  $\text{H}^8$ ,  $^3J_{\text{HH}} = 8.4$  Hz), 7.05 (d, 2 H,  $m\text{-Tol}$ ,  $^3J_{\text{HH}} = 8.0$  Hz), 7.21 (d, 2 H,  $o\text{-Tol}$ ,  $^3J_{\text{HH}} = 8.0$  Hz), 7.36 (t, 1 H,  $\text{H}^7$ ,  $^3J_{\text{HH}} = 7.8$  Hz), 7.55 (d, 1 H,  $\text{H}^5$ ,  $^3J_{\text{HH}} = 8.4$  Hz), 8.34 (s br, 1 H, NH).  $^{13}\text{C}\{^1\text{H}\}$  NMR (100.8 MHz,  $\text{CDCl}_3$ , 25 °C, TMS):  $\delta$  17.9 (Me), 21.0 ( $\text{Me}^{\text{Tol}}$ ), 24.2 ( $\text{CH}_2^{\text{Cy}}$ ), 25.0 ( $\text{CH}_2^{\text{Cy}}$ ), 25.3 ( $\text{CH}_2^{\text{Cy}}$ ), 29.8 ( $\text{CH}_2^{\text{Cy}}$ ), 32.2 ( $\text{CH}_2^{\text{Cy}}$ ), 64.2 ( $\text{CH}^{\text{Cy}}$ ), 65.3 ( $\text{CH}^2$ ), 116.1 ( $\text{C}^{4\text{a}}$ ), 117.5 ( $\text{CH}^8$ ), 120.0 ( $\text{CH}^6$ ), 120.5 (q,  $^1J_{\text{CF}} = 319.6$  Hz, TfO), 126.1 ( $\text{CH}^{o\text{-Tol}}$ ), 129.0 ( $\text{CH}^5$ ), 129.4 ( $\text{CH}^{m\text{-Tol}}$ ), 132.7 ( $\text{C}^{p\text{-Tol}}$ ), 138.9 ( $\text{CH}^7$ ), 139.3 ( $\text{C}^{i\text{-Tol}}$ ), 145.3 ( $\text{C}^{8\text{a}}$ ), 168.0 ( $\text{C}^4$ ). IR (Nujol,  $\text{cm}^{-1}$ ):  $\nu(\text{NH})$  3262,  $\nu(\text{C}=\text{N} + \text{C}=\text{C})$  1621, 1590, and 1557. HRMS (ESI)  $m/z$  calcd for  $\text{C}_{22}\text{H}_{27}\text{N}_2$   $[\text{M}]^+$ , 319.2169; found 319.2173. Anal. calcd for  $\text{C}_{23}\text{H}_{27}\text{F}_3\text{N}_2\text{O}_3\text{S}\cdot\text{H}_2\text{O}$ : C, 56.78; H, 6.01; N, 5.76; S,

6.59. Found: C, 56.35; H, 6.00; N, 5.87; S, 6.92.

**3d3** ( $R^1 = \text{Me}$ ,  $R^2 = \text{Cy}$ ,  $R^3 = \text{CH(Me)Ph}$ ,  $R^4 = \text{H}$ ): Reagents, **2d** (200 mg, 0.92 mmol), *rac*-PhCH(Me)CHO (150  $\mu\text{L}$ , 1.11 mmol) and HOTf (100  $\mu\text{L}$ , 1.15 mmol). After 4 h of stirring, the reaction mixture was concentrated to dryness. The oily residue was dissolved in  $\text{CH}_2\text{Cl}_2$  and cold  $\text{Et}_2\text{O}$  (30 mL, 0  $^\circ\text{C}$ ) was added; the suspension was stirred at 0  $^\circ\text{C}$  for 30 min and filtered. The solid collected was washed with cold  $\text{Et}_2\text{O}$  (3 x 5 mL, 0 $^\circ\text{C}$ ), filtered and dried under vacuum for 6 h to give **3d3**·0.5H<sub>2</sub>O as orange solid mixture of isomers, D and d, in a 65:35 molar ratio. Yield: 323.7 mg, 0.67 mmol, 73%. Mp: 154  $^\circ\text{C}$ .  $^1\text{H}$  NMR (400 MHz,  $\text{CDCl}_3$ , 25  $^\circ\text{C}$ , TMS):  $\delta$  0.52 (m, 1 H,  $\text{CH}_2^{\text{Cy, d}}$ ), 0.64 (m, 1 H,  $\text{CH}_2^{\text{Cy, d}}$ ), 0.97-2.06 (various m, 10 H,  $\text{CH}_2^{\text{Cy, D+d}} + \text{H}_2\text{O}$ ), 1.34 (d, 3 H,  $^3J_{\text{HH}} = 6.8$  Hz,  $\text{CH(Me)Ph}^{\text{d}}$ ), 1.51 (d, 3 H,  $\text{CH(Me)Ph}^{\text{D}}$ ,  $^3J_{\text{HH}} = 7.2$  Hz), 2.46 (m, 1 H,  $\text{CH}_2^{\text{Cy, D}}$ ), 2.51 (s, 3 H,  $\text{Me}^{4, \text{D}}$ ), 2.71 (s, 3 H,  $\text{Me}^{4, \text{d}}$ ), 2.90 (m, 1 H,  $\text{CH(Me)Ph}^{\text{D}}$ ), 3.13 (m, 1 H,  $\text{CH(Me)Ph}^{\text{d}}$ ), 3.68 (m, 1 H,  $\text{CH}^{\text{Cy, d}}$ ), 4.32 (m, 1 H,  $\text{CH}^{\text{Cy, D}}$ ), 5.64 (m, 1 H,  $\text{H}^{2, \text{d}}$ ), 5.80 (m, 1 H,  $\text{H}^{2, \text{D}}$ ), 6.42 (“dt”, 1 H,  $\text{H}^{6, \text{D}}$ ,  $^3J_{\text{HH}} = 7.6$  Hz,  $^4J_{\text{HH}} = 0.8$  Hz), 6.74 (dd, 1 H,  $\text{H}^{5, \text{D}}$ ,  $^3J_{\text{HH}} = 8.4$  Hz,  $^4J_{\text{HH}} = 0.8$  Hz), 6.90 (m, 3 H,  $\text{H}^{8, \text{D}} + o\text{-Ph}^{\text{D}}$ ), 6.94-7.02 (various m, 4 H,  $m\text{-} + p\text{-Ph}^{\text{D}} + \text{H}^{6, \text{d}}$ ), 7.15 (d, 2 H,  $o\text{-Ph}$ ,  $^3J_{\text{HH}} = 8.0$  Hz), 7.20 (d, 1 H,  $\text{H}^{8, \text{d}}$ ,  $^3J_{\text{HH}} = 8.4$  Hz), 7.24-7.30 (m,  $\text{H}^{7, \text{D}} + p\text{-Ph}^{\text{d}}$ ), 7.35 (m, 2 H,  $m\text{-Ph}^{\text{d}}$ ) 7.58 (ddd, 1 H,  $\text{H}^{7, \text{d}}$ ,  $^3J_{\text{HH}} = 8.2$  Hz,  $^3J_{\text{HH}} = 7.0$  Hz,  $^4J_{\text{HH}} = 1.0$  Hz), 7.68 (d br, 1 H,  $^3J_{\text{HH}} = 5.2$  Hz,  $\text{NH}^{\text{D}}$ ), 7.75 (d, 1 H,  $\text{H}^5$ ,  $^3J_{\text{HH}} = 8.8$  Hz), 8.27 (d br, 1 H,  $\text{NH}^{\text{d}}$ ,  $^3J_{\text{HH}} = 4.4$  Hz).  $^{13}\text{C}\{^1\text{H}\}$  NMR (100.8 MHz,  $\text{CDCl}_3$ , 25  $^\circ\text{C}$ , TMS):  $\delta$  14.5 ( $\text{CH(Me)Ph}$ , M), 16.9 ( $\text{CH(Me)Ph}$ , m), 17.4 ( $\text{Me}^{4, \text{D}}$ ), 18.7 ( $\text{Me}^{4, \text{d}}$ ), 24.3 ( $\text{CH}_2^{\text{Cy, D}}$ ), 24.1 ( $\text{CH}_2^{\text{Cy, d}}$ ), 25.1 ( $\text{CH}_2^{\text{Cy, d}}$ ), 25.3 ( $\text{CH}_2^{\text{Cy, D}}$ ), 25.4 ( $\text{CH}_2^{\text{Cy, D}}$ ), 25.9 ( $\text{CH}_2^{\text{Cy, d}}$ ), 29.0 ( $\text{CH}_2^{\text{Cy, d}}$ ), 31.3 ( $\text{CH}_2^{\text{Cy, D}}$ ), 32.4 ( $\text{CH}_2^{\text{Cy, D}}$ ), 33.4 ( $\text{CH}_2^{\text{Cy, d}}$ ), 37.3 ( $\text{CH(Me)Ph}^{\text{d}}$ ), 45.4 ( $\text{CH(Me)Ph}^{\text{D}}$ ), 64.4 ( $\text{CH}^{\text{Cy, D+d}}$ ), 69.1 ( $\text{CH}^{2, \text{D}}$ ), 70.3 ( $\text{CH}^{2, \text{d}}$ ), 116.0 ( $\text{CH}^{8, \text{D}}$ ), 116.7 ( $\text{C}^{4a, \text{D}}$ ), 117.2 ( $\text{C}^{4a, \text{d}}$ ), 117.3 ( $\text{CH}^{8, \text{d}}$ ), 118.5 ( $\text{CH}^{6, \text{D}}$ ), 120.1 ( $\text{CH}^{6, \text{d}}$ ), 120.6 (q,  $^1J_{\text{CF}} = 319.6$



Hz, CF<sub>3</sub>SO<sub>3</sub>), 127.4 (CH<sup>p-Ph, D</sup>), 127.9 (CH<sup>p-Ph, d</sup>), 128.0 (CH<sup>m-Ph, D</sup>), 128.3 (CH<sup>5, D</sup> + CH<sup>o-Ph, D</sup>), 128.7 (CH<sup>o-Ph, d</sup>), 129.0 (CH<sup>m-Ph, d</sup>), 138.3 (CH<sup>7, D</sup>), 139.0 (C<sup>i-Ph, D</sup>), 139.0 (CH<sup>7, d</sup>), 139.6 (C<sup>i-Ph, d</sup>), 144.3 (C<sup>8a, d</sup>), 146.6 (C<sup>8a, D</sup>), 168.4 (C<sup>4, D</sup>), 166.8 (C<sup>4, d</sup>). IR (Nujol, cm<sup>-1</sup>): ν(NH) 3291, ν(C=N + C=C) 1622, 1588, 1558. HRMS (ESI) *m/z* calcd for C<sub>23</sub>H<sub>29</sub>N<sub>2</sub> [M]<sup>+</sup>, 333.2325; found 333.2330. Anal. calcd for C<sub>24</sub>H<sub>29</sub>F<sub>3</sub>N<sub>2</sub>O<sub>3</sub>S·0.5H<sub>2</sub>O: C, 58.64; H, 6.15; N, 5.70; S, 6.52. Found: C, 58.86; H, 6.01; N, 5.76; S, 5.97.

**3d4** (R<sup>1</sup> = Me, R<sup>2</sup> = Cy, R<sup>3</sup> = Me, R<sup>4</sup> = H): Reagents, **2d** (90 mg, 0.42 mmol), MeCHO (200 μL, 3.54 mmol) and HOTf (38 μL, 0.44 mmol). After 6.5 h of stirring, the solution was concentrated under vacuum to dryness. The oily residue was washed successively with a mixture of CH<sub>2</sub>Cl<sub>2</sub> and Et<sub>2</sub>O (1:200, 20.1 mL) and with *n*-pentane (20 mL), dried under vacuum for 6 h, stirred with cold Et<sub>2</sub>O (20 mL, 0 °C), and filtered. The solid collected was dried first by suction and then under vacuum for 6h to give **3d4** as a pale yellow solid. Yield: 145.0 mg, 0.37 mmol, 89%. Mp: 114 °C. <sup>1</sup>H NMR (400 MHz, CDCl<sub>3</sub>, 25 °C, TMS): δ 1.19-1.48 (various m, 2 H, CH<sub>2</sub><sup>Cy</sup>), 1.35 (d, 3 H, <sup>3</sup>J<sub>HH</sub> = 6.4 Hz, C<sup>2</sup>Me), 1.72-2.10 (various m, 8 H, CH<sub>2</sub><sup>Cy</sup>), 2.71 (s, 3 H, C<sup>4</sup>Me), 4.18 (m, 1 H, CH<sup>Cy</sup>), 5.84 (q, 1 H, H<sup>2</sup>, <sup>3</sup>J<sub>HH</sub> = 6.0 Hz), 6.89 (“dt”, 1 H, H<sup>6/7</sup>, <sup>3</sup>J<sub>HH</sub> = 7.6 Hz, <sup>4</sup>J<sub>HH</sub> = 0.4 Hz), 7.04 (d, 1 H, H<sup>5/8</sup>, <sup>3</sup>J<sub>HH</sub> = 8.4 Hz), 7.50 (“dt”, 1 H, H<sup>6/7</sup>, <sup>3</sup>J<sub>HH</sub> = 7.6 Hz, <sup>4</sup>J<sub>HH</sub> = 0.8 Hz), 7.58 (d, 1 H, H<sup>5/8</sup>, <sup>3</sup>J<sub>HH</sub> = 8.0 Hz), 7.67 (s br, 1 H, NH). <sup>13</sup>C {<sup>1</sup>H} NMR (100.8 MHz, CDCl<sub>3</sub>, 25 °C, TMS): δ 17.8 (C<sup>2</sup>Me + C<sup>4</sup>Me), 24.3 (CH<sub>2</sub><sup>Cy</sup>), 25.2 (CH<sub>2</sub><sup>Cy</sup>), 25.3 (CH<sub>2</sub><sup>Cy</sup>), 30.4 (CH<sub>2</sub><sup>Cy</sup>), 31.8 (CH<sub>2</sub><sup>Cy</sup>), 61.5 (CH<sup>Cy</sup> or CH<sup>2</sup>), 63.6 (CH<sup>Cy</sup> or CH<sup>2</sup>), 114.5 (C<sup>4a</sup>), 117.6 (CH<sup>8</sup>), 119.7 (CH<sup>6</sup>), 120.5 (q, <sup>1</sup>J<sub>CF</sub> = 320 Hz, TfO), 129.2 (CH<sup>5</sup>), 138.9 (CH<sup>7</sup>), 145.7 (C<sup>8a</sup>), 166.1 (C<sup>4</sup>). IR (Nujol, cm<sup>-1</sup>): ν(NH) 3250, ν(C=N + C=C) 1622, 1573, 1587, 1562. HRMS (ESI) *m/z* calcd for C<sub>16</sub>H<sub>23</sub>N<sub>2</sub> [M]<sup>+</sup>, 243.1856; found 243.1857. Anal. calcd for C<sub>17</sub>H<sub>23</sub>F<sub>3</sub>N<sub>2</sub>O<sub>3</sub>S: C, 52.03; H, 5.91; N, 7.14; S, 8.17. Found: C, 51.59; H, 5.47; N, 7.18; S, 7.88.

Crystals of **3d4** suitable for an X-ray diffraction study were obtained by slow diffusion of Et<sub>2</sub>O into a solution of the product in CHCl<sub>3</sub>.

**<sup>1</sup>H and <sup>13</sup>C{<sup>1</sup>H} NMR assignment for 3d5 (R<sup>1</sup> = Me, R<sup>2</sup> = Cy, R<sup>3</sup> = Fc, R<sup>4</sup> = H):** <sup>1</sup>H NMR (400 MHz, CDCl<sub>3</sub>, 25 °C, TMS): δ 1.28-1.40 (m, 3 H, CH<sub>2</sub><sup>Cy</sup>), 1.70-2.03 (various m, 7 H, CH<sub>2</sub><sup>Cy</sup>), 2.63 (s, 3 H, Me), 3.53 (s br, 1 H, Fc), 3.98 (s br, 1 H, Fc), 4.09 (m, 1 H, CH<sup>Cy</sup>), 4.16 (s br, 1 H, Fc), 4.26 (s, 5 H, Fc), 4.34 (s br, 1 H, Fc), 6.47 (s br, 1 H, H<sup>2</sup>), 6.92 (t, 1 H, H<sup>6</sup>, <sup>3</sup>J<sub>HH</sub> = 7.6 Hz), 7.23 (d, 1 H, H<sup>8</sup>, <sup>3</sup>J<sub>HH</sub> = 8.4 Hz), 7.54-7.60 (m, 2 H, H<sup>5+7</sup>), 8.29 (s br, 1 H, NH). <sup>1</sup>H NMR (400 MHz, CDCl<sub>3</sub>, 0 °C, TMS): δ 1.24-1.40 (m, 3 H, CH<sub>2</sub><sup>Cy</sup>), 1.71-2.02 (various m, 7 H, CH<sub>2</sub><sup>Cy</sup>), 2.63 (s, 3 H, Me), 3.50 (s br, 1 H, Fc), 3.98 (s br, 1 H, Fc), 4.09 (m, 1 H, CH<sup>Cy</sup>), 4.16 (s br, 1 H, Fc), 4.28 (s, 5 H, Fc), 4.34 (s br, 1 H, Fc), 6.42 (d, 1 H, H<sup>2</sup>, <sup>3</sup>J<sub>HH</sub> = 4.4 Hz), 6.93 (t, 1 H, H<sup>6</sup>, <sup>3</sup>J<sub>HH</sub> = 7.4 Hz), 7.22 (d, 1 H, H<sup>8</sup>, <sup>3</sup>J<sub>HH</sub> = 8.0 Hz), 7.55-7.60 (m, 2 H, H<sup>5+7</sup>), 8.25 (d br, 1 H, NH, <sup>3</sup>J<sub>HH</sub> = 3.6 Hz). <sup>13</sup>C{<sup>1</sup>H} NMR (100.8 MHz, CDCl<sub>3</sub>, 0 °C, TMS): δ 17.9 (Me), 24.3 (CH<sub>2</sub><sup>Cy</sup>), 25.3 (CH<sub>2</sub><sup>Cy</sup>), 25.4 (CH<sub>2</sub><sup>Cy</sup>), 31.7 (CH<sub>2</sub><sup>Cy</sup>), 32.0 (CH<sub>2</sub><sup>Cy</sup>), 63.9 (CH<sup>2</sup>), 64.1 (CH<sup>Cy</sup>), 66.5 (CH<sup>Fc</sup>), 68.1 (CH<sup>Fc</sup>), 68.7 (CH<sup>Fc</sup>), 68.9 (CH<sup>Fc</sup>), 69.5 (CH<sup>Fc</sup>), 85.9 (C<sup>Fc</sup>), 115.7 (C<sup>4a</sup>), 116.7 (CH<sup>8</sup>), 118.9 (CH<sup>6</sup>), 120.5 (q, <sup>1</sup>J<sub>CF</sub> = 320 Hz, CF<sub>3</sub>SO<sub>3</sub>), 128.9 (CH<sup>5</sup>), 138.8 (CH<sup>7</sup>), 145.5 (C<sup>8a</sup>), 165.3 (C<sup>4</sup>). IR (Nujol, cm<sup>-1</sup>): ν(NH) 3226, ν(C=N + C=C) 1621, 1583, 1557. HRMS (ESI) *m/z* calcd for C<sub>25</sub>H<sub>29</sub>N<sub>2</sub>Fe [M]<sup>+</sup>, 413.1675; found 413.1677. Anal. calcd for C<sub>26</sub>H<sub>29</sub>F<sub>3</sub>FeN<sub>2</sub>O<sub>3</sub>S: C, 55.52; H, 5.20; N, 4.98; S, 5.70. Found: C, 55.54; H, 4.94; N, 5.06; S, 5.43.

**3e2 (R<sup>1</sup> = Me, R<sup>2</sup> = *R*-CH(Me)Ph, R<sup>3</sup> = Tol, R<sup>4</sup> = H):** Reagents, *R*-**2e** (300 mg, 1.33 mmol), TolCHO (160 μL, 1.35 mmol) and HOTf (120 μL, 1.38 mmol). After 1 h of stirring, the solution was concentrated under vacuum to dryness. The residue was washed with a mixture of CH<sub>2</sub>Cl<sub>2</sub>/Et<sub>2</sub>O (1:30, 5 x 31 mL) and dried under vacuum (6 h) to give **3e2**·0.5H<sub>2</sub>O as a yellow solid, which consists of a mixture of two isomers,

D and d, in 65:35 molar ratio. This compound must be stored below -34 °C. Yield: 308.3 mg, 0.66 mmol, 50%. <sup>1</sup>H NMR (400 MHz, CDCl<sub>3</sub>, 25 °C, TMS): δ 1.690 (d, 3 H, CH(Me)Ph<sup>D</sup>, <sup>3</sup>J<sub>HH</sub> = 6.8 Hz), 1.694 (d, 4 H, H<sub>2</sub>O + CH(Me)Ph<sup>d</sup>, <sup>3</sup>J<sub>HH</sub> = 7.2 Hz), 2.07 (s, 3 H, Me<sup>Tol, d</sup>), 2.20 (s, 3 H, Me<sup>Tol, D</sup>), 2.82 (s, 3 H, Me<sup>4, D</sup>), 3.03 (s, 3 H, Me<sup>4, d</sup>), 5.82 (q, 1 H, CH(Me)Ph<sup>d</sup>, <sup>3</sup>J<sub>HH</sub> = 6.4 Hz), 5.92 (q, 1 H, CH(Me)Ph<sup>D</sup>, <sup>3</sup>J<sub>HH</sub> = 6.8 Hz), 6.69-6.88 (various m, 7 H, M + m), 6.97 (d, 2 H, *m*-Tol<sup>d</sup>, <sup>3</sup>J<sub>HH</sub> = 8.8 Hz), 7.07 (d, 2 H, *m*-Tol<sup>D</sup>, <sup>3</sup>J<sub>HH</sub> = 8.0 Hz), 7.13-7.51 (several m, 14 H<sup>D+d</sup>), 7.57 (d, 1 H, H<sup>5, d</sup>, <sup>3</sup>J<sub>HH</sub> = 8.4 Hz), 8.27 (s br, 1 H, NH<sup>d</sup>), 8.49 (d br, 1 H, NH<sup>D</sup>, <sup>3</sup>J<sub>HH</sub> = 4.0 Hz). <sup>13</sup>C{<sup>1</sup>H} NMR (100.8 MHz, CDCl<sub>3</sub>, 25 °C, TMS): δ 18.5 (Me<sup>4, D+d</sup>), 19.3 (CH(Me)Ph<sup>d</sup>), 19.6 (CH(Me)Ph<sup>D</sup>), 20.8 (Me<sup>Tol, d</sup>), 20.9 (Me<sup>Tol, D</sup>), 63.5 (CH(Me)Ph<sup>d</sup>), 63.7 (CH(Me)Ph<sup>D</sup>), 66.3 (CH<sup>2, D</sup>), 66.4 (CH<sup>2, d</sup>), 116.4 (C<sup>4a, D</sup>), 116.5 (C<sup>4a, d</sup>), 117.2 (CH<sup>8, d</sup>), 117.3 (CH<sup>8, D</sup>), 120.0 (CH<sup>6, D+d</sup>), 120.6 (q, <sup>1</sup>J<sub>CF</sub> = 320 Hz, TfO), 125.7 (CH<sup>o-Tol, d</sup>), 126.1 [CH<sup>o-Tol, D</sup> + CH<sup>Ph, D+d</sup>], 128.6 (CH<sup>Ph, D</sup>), 128.8 (CH<sup>Ph, D</sup>), 129.0 (CH<sup>Ph, D</sup>), 129.05 (C<sup>5, D</sup>), 129.11 (CH<sup>Ph, d</sup>), 129.2 (CH<sup>Ph, D</sup>), 129.3 (CH<sup>Ph, d</sup>), 129.5 (CH<sup>m-Tol, d</sup> + CH<sup>Ph, d</sup>), 129.7 (CH<sup>m-Tol, D</sup>), 129.8 (CH<sup>Ph, d</sup>), 131.9 (C<sup>p-Tol, d</sup>), 132.7 (C<sup>p-Tol, D</sup>), 133.2 (C<sup>i-Ph, d</sup>), 138.2 (C<sup>i-Ph, D</sup>), 138.7 (C<sup>i-Tol, d</sup>), 139.0 (CH<sup>7, d</sup>), 139.1 (CH<sup>7, D</sup>), 139.4 (C<sup>i-Tol, D</sup>), 145.5 (C<sup>8a, d</sup>), 145.8 (C<sup>8a, D</sup>), 168.2 (C<sup>4, d</sup>), 170.7 (C<sup>4, D</sup>). Trace amounts of **7e2**, are always present in the NMR spectra. IR (Nujol, cm<sup>-1</sup>): ν(NH) 3251, ν(C=N + C=C) 1620, 1588, and 1556. HRMS (ESI) *m/z* calcd for C<sub>24</sub>H<sub>25</sub>N<sub>2</sub> [M]<sup>+</sup>, 341.2012; found 341.2013. Anal. calcd for C<sub>24</sub>H<sub>26</sub>F<sub>3</sub>N<sub>2</sub>O<sub>3</sub>S·0.5H<sub>2</sub>O: C, 60.11; H, 5.25; N, 5.61; S, 6.42. Found: C, 59.99; H, 5.29; N, 5.62; S, 6.47.

**3e4** (R<sup>1</sup> = Me, R<sup>2</sup> = *R*-CH(Me)Ph, R<sup>3</sup> = Me, R<sup>4</sup> = H): Reagents, **R-2e** (92 mg, 0.41 mmol), MeCHO (0.1 mL, 1.77 mmol) and HOTf (50 μL, 0.57 mmol, added with 20 min delay). After 18 h of stirring, the reaction mixture was filtered through anhydrous MgSO<sub>4</sub> and concentrated under vacuum to dryness. The oily residue was washed successively with a cold mixture of CH<sub>2</sub>Cl<sub>2</sub> and Et<sub>2</sub>O (1:30, 3 x 31 mL, 0 °C) and with a

cold mixture of  $\text{CH}_2\text{Cl}_2$  and *n*-pentane (1:40, 2 x 41 mL, 0 °C) and dried under vacuum for 6 h to give  $3\mathbf{e}4\cdot\text{H}_2\text{O}$  as a hygroscopic orange solid, consisting of a mixture of the *RR* + *RS* isomers, D and d, in 3:2 molar ratio, which was stored under a nitrogen atmosphere. Yield: 119.4 mg, 0.28 mmol, 68%. Mp: 133 °C.  $^1\text{H}$  NMR (400 MHz,  $\text{CDCl}_3$ , 25 °C, TMS):  $\delta$  0.63 (d, 3 H,  $\text{Me}^{2,\text{D}}$ ,  $^3J_{\text{HH}} = 6.4$  Hz), 1.46 (d, 3 H,  $\text{Me}^{2,\text{d}}$ ,  $^3J_{\text{HH}} = 6.4$  Hz), 1.86-1.92 (v br, 2 H,  $\text{H}_2\text{O}$ ), 1.87 (d, 3 H,  $\text{CH}(\text{Me})\text{Ph}^{\text{D}}$ ,  $^3J_{\text{HH}} = 6.8$  Hz), 1.91 (d, 3 H,  $\text{CH}(\text{Me})\text{Ph}^{\text{d}}$ ,  $^3J_{\text{HH}} = 6.8$  Hz), 2.73 (s, 3H,  $\text{Me}^{4,\text{d}}$ ), 2.93 (s, 3H,  $\text{Me}^{4,\text{D}}$ ), 5.69-5.76 (m, 4 H,  $\text{H}^{2,\text{D+d}} + \text{CH}(\text{Me})\text{Ph}^{\text{D+d}}$ ), 6.86 (t, 1 H,  $\text{H}^{6,\text{d}}$ ,  $^3J_{\text{HH}} = 7.6$  Hz), 6.89 (t, 1 H,  $\text{H}^{6,\text{D}}$ ,  $^3J_{\text{HH}} = 7.6$  Hz), 6.97 (d, 1 H,  $\text{H}^{8,\text{D}}$ ,  $^3J_{\text{HH}} = 8.4$  Hz), 7.03 (d, 1 H,  $\text{H}^{8,\text{d}}$ ,  $^3J_{\text{HH}} = 8.4$  Hz), 7.27-7.65 (several m, 16 H,  $\text{H}^{7,\text{D+d}} + \text{H}^{5,\text{D+d}} + \text{Ph}^{\text{D+d}} + \text{NH}^{\text{D+d}}$ ).  $^{13}\text{C}\{^1\text{H}\}$  NMR (100.8 MHz,  $\text{CDCl}_3$ , 25 °C, TMS):  $\delta$  16.8 ( $\text{Me}^{2,\text{D}}$ ), 18.0 ( $\text{Me}^{2,\text{d}}$ ), 18.3 ( $\text{Me}^{4,\text{D}}$ ), 18.4 ( $\text{Me}^{4,\text{d}} + \text{CH}(\text{Me})\text{Ph}^{\text{D}}$ ), 19.1 ( $\text{CH}(\text{Me})\text{Ph}^{\text{d}}$ ), 62.0 ( $\text{CH}(\text{Me})\text{Ph}^{\text{D}}$ ), 62.1 ( $\text{CH}^{2,\text{d}}$ ), 62.6 ( $\text{CH}(\text{Me})\text{Ph}^{\text{d}}$ ), 62.7 ( $\text{CH}^{2,\text{D}}$ ), 115.0 ( $\text{C}^{4\text{a},\text{d}}$ ), 115.2 ( $\text{C}^{4\text{a},\text{D}}$ ), 117.5 ( $\text{CH}^{8,\text{d}}$ ), 117.6 ( $\text{CH}^{8,\text{D}}$ ), 119.8 ( $\text{CH}^{6,\text{d}}$ ), 119.9 ( $\text{CH}^{6,\text{D}}$ ), 120.6 (q,  $^1J_{\text{CF}} = 320$  Hz, TfO), 126.1 ( $\text{CH}^{o/m-\text{Ph},\text{d}}$ ), 128.7 ( $\text{PhCH}^{o/m-\text{Ph},\text{D}}$ ), 129.1 ( $\text{CH}^{p-\text{Ph},\text{d}}$ ), 129.45 ( $\text{CH}^{5,\text{d}}$ ), 129.47 ( $\text{CH}^{5,\text{D}}$ ), 129.60 ( $\text{CH}^{o/m-\text{Ph},\text{D}}$ ), 129.62 ( $\text{CH}^{o/m-\text{Ph},\text{d}}$ ), 130.1 ( $\text{CH}^{p-\text{Ph},\text{D}}$ ), 134.0 ( $\text{C}^{i-\text{Ph},\text{D}}$ ), 137.2 ( $\text{C}^{i-\text{Ph},\text{d}}$ ), 138.9 ( $\text{CH}^{7,\text{D}}$ ), 139.1 ( $\text{CH}^{7,\text{d}}$ ), 145.9 ( $\text{C}^{8\text{a},\text{D}}$ ), 146.1 ( $\text{C}^{8\text{a},\text{d}}$ ), 165.8 ( $\text{C}^{4,\text{D}}$ ), 168.6 ( $\text{C}^{4,\text{d}}$ ). IR (Nujol,  $\text{cm}^{-1}$ ):  $\nu(\text{NH})$  3272,  $\nu(\text{C}=\text{N} + \text{C}=\text{C})$  1621, 1615, and 1592. HRMS (ESI)  $m/z$  calcd for  $\text{C}_{18}\text{H}_{21}\text{N}_2$   $[\text{M}]^+$ , 265.1699; found 265.1703. Anal. calcd for  $\text{C}_{19}\text{H}_{21}\text{F}_3\text{N}_2\text{O}_3\text{S}\cdot\text{H}_2\text{O}$ : C, 52.77; H, 5.36; N, 6.48; S, 7.41. Found: C, 52.64; H, 5.32; N, 6.16; S, 7.41.

**$^1\text{H}$  and  $^{13}\text{C}\{^1\text{H}\}$  NMR assignment for ( $\text{H}_2\text{NC}_6\text{H}_4\text{C}(\text{Me})=\text{NHCy-2}$ ) OTf (4).**  $^1\text{H}$  NMR (300 MHz,  $\text{CDCl}_3$ , 25 °C, TMS):  $\delta$  1.13-1.42 (m, 3 H,  $\text{CH}_2^{\text{Cy}}$ ), 1.53-1.67 (m, 3 H,  $\text{CH}_2^{\text{Cy}}$ ), 1.77 (m, 2 H,  $\text{CH}_2^{\text{Cy}}$ ), 2.03 (m 2 H,  $\text{CH}_2^{\text{Cy}}$ ), 2.78 (s, 3 H, Me), 3.93 (m, 1 H,  $\text{CH}^{\text{Cy}}$ ), 6.05 (s br, 3 H,  $\text{NH}_3$ ), 6.83 (d, 1 H,  $\text{H}^3$ ,  $^3J_{\text{HH}} = 8.1$  Hz), 6.90 (t, 1 H,  $\text{H}^5$ ,  $^3J_{\text{HH}} = 7.7$  Hz), 7.33-7.38 (m, 2 H,  $\text{H}^{4+6}$ ).  $^{13}\text{C}\{^1\text{H}\}$  NMR (100.8 MHz,  $\text{CDCl}_3$ , 25 °C, TMS):  $\delta$

18.8 (Me), 24.2 (CH<sub>2</sub><sup>Cy</sup>), 24.4 (CH<sub>2</sub><sup>Cy</sup>), 30.5 (CH<sub>2</sub><sup>Cy</sup>), 58.0 (CH<sup>Cy</sup>), 119.1 (C<sup>1</sup>), 119.7 (CH<sup>3/5</sup>), 119.8 (CH<sup>3/5</sup>), 130.4 (CH<sup>6</sup>), 135.5 (CH<sup>4</sup>), 147.1 (C<sup>2</sup>), 182.9 (C<sup>7</sup>).

### Synthesis of bis-(1,2-Dihydroquinazolinium) Triflates:

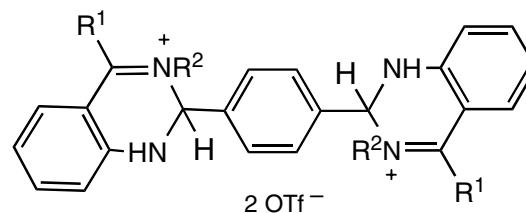

**5b** ( $R^1 = H$ ,  $R^2 = To$ ). **2b** (300 mg, 1.43 mmol) was dissolved in MeCN (30 mL) in a Carius tube. To the solution were successively added terephthalaldehyde (47.8 mg, 0.36 mmol) and HOTf (70  $\mu$ L, 0.80 mmol) and the reaction mixture was heated at 100 °C overnight, allowed to cool to room temperature and filtered through a short pad of anhydrous MgSO<sub>4</sub>. The solution was concentrated under vacuum (1 mL) and cold Et<sub>2</sub>O (60 mL, 0 °C) was added. The resulting suspension was stirred for 15 min at 0 °C and filtered. The solid collected was recrystallized from MeCN/Et<sub>2</sub>O (2 mL/50 mL) at 0 °C and dried under vacuum (6 h) to give **5b** as an orange solid consisting of a mixture of isomers *RR+SS+RS* in 1:1:2 molar ratio. Yield: 173.0 mg, 0.21 mmol, 58%. Mp: 286 °C. <sup>1</sup>H NMR (600 MHz, CD<sub>3</sub>CN, -10 °C):  $\delta$  2.38 (s, 12 H, Me<sup>RR+SS+RS</sup>), 6.97 (“dt”, 4 H, H<sup>6, RR+SS+RS</sup>, <sup>3</sup>J<sub>HH</sub> = 7.8 Hz, <sup>3</sup>J<sub>HH</sub> = 3 Hz), 6.98 (d, 4 H, H<sup>8, RR+SS+RS</sup>, <sup>3</sup>J<sub>HH</sub> = 9.0 Hz), 7.05 (d, 4 H, H<sup>2, RR+SS+RS</sup>, <sup>3</sup>J<sub>HH</sub> = 4.8 Hz), 7.34-7.39 (m, 8 H, H<sup>5+Tol/Ar</sup>), 7.47 (br s, 8 H, H<sup>7+Tol/Ar</sup>), 7.59 (s br, 4 H, NH<sup>RR+SS+RS</sup>), 7.63 (m, 8 H, H<sup>5+Tol/Ar</sup>), 9.02 (s br, 2 H, H<sup>4, (RR+SS)/RS</sup>), 9.03 (s br, 2 H, H<sup>4</sup>,

$(RR+SS)/RS$ .  $^1\text{H}$  NMR (400 MHz,  $\text{CD}_3\text{CN}$ , 25 °C):  $\delta$  2.40 (s, 6 H, Me), 6.97 (“dt”, 2 H,  $\text{H}^6$ ,  $^3J_{\text{HH}} = 7.6$  Hz,  $^3J_{\text{HH}} = 0.8$  Hz), 7.00 (d, 2 H,  $\text{H}^8$ ,  $^3J_{\text{HH}} = 8.4$  Hz), 7.04 (d, 2 H,  $\text{H}^2$ ,  $^3J_{\text{HH}} = 4.4$  Hz), 7.37 (m, 4 H,  $\text{H}^{5+\text{Tol/Ar}}$ ), 7.44 (d br, 2 H, NH,  $^3J_{\text{HH}} = 4.0$  Hz), 7.48 (s br, 4 H,  $\text{H}^{7+\text{Tol/Ar}}$ ), 7.65 (m, 4 H,  $\text{H}^{5+\text{Tol/Ar}}$ ), 8.97 (s, 2 H,  $\text{H}^4$ ).  $^{13}\text{C}\{^1\text{H}\}$  NMR (100.8 MHz,  $\text{CD}_3\text{CN}$ , 25 °C):  $\delta$  21.2 (Me), 73.1 ( $\text{CH}^2$ ), 114.9 ( $\text{C}^{4a}$ ), 116.0 ( $\text{CH}^8$ ), 121.9 ( $\text{CH}^6$ ), 123.8 ( $\text{CH}^{o/m\text{-Tol}}$ ), 128.2 ( $\text{CH}^{\text{C}_6\text{H}_4}$ ), 131.7 ( $\text{CH}^{o/m\text{-Tol}}$ ), 134.6 ( $\text{CH}^5$ ), 138.7 ( $\text{C}^{\text{p-Tol}}$ ), 139.3 ( $\text{C}^{\text{C}_6\text{H}_4}$ ), 142.7 ( $\text{C}^{\text{i-Tol}}$ ), 143.1 ( $\text{CH}^7$ ), 147.1 ( $\text{C}^{8a}$ ), 160.7 ( $\text{CH}^4$ ).  $^{13}\text{C}\{^1\text{H}\}$  NMR (150.9 MHz,  $\text{CD}_3\text{CN}$ , -10 °C):  $\delta$  21.0 (Me), 72.3 ( $\text{CH}^2$ ), 114.68 ( $\text{C}^{4a, (RR+SS)/RS}$ ), 114.70 ( $\text{C}^{4a, (RR+SS)/RS}$ ), 116.7 ( $\text{CH}^8$ ), 121.6 ( $\text{CH}^6$ ), 123.31 ( $\text{CH}^{o/m\text{-Tol}, (RR+SS)/RS}$ ), 123.32 ( $\text{CH}^{o/m\text{-Tol}, (RR+SS)/RS}$ ), 127.7 ( $\text{CH}^{\text{C}_6\text{H}_4}$ ), 131.5 ( $\text{CH}^{o/m\text{-Tol}, (RR+SS)/RS}$ ), 134.31 ( $\text{CH}^{o/m\text{-Tol}, (RR+SS)/RS}$ ), 134.33 ( $\text{CH}^5$ ), 138.4 ( $\text{C}^{\text{p-Tol}}$ ), 139.0 ( $\text{C}^{\text{C}_6\text{H}_4}$ ), 142.4 ( $\text{C}^{\text{i-Tol}}$ ), 142.8 ( $\text{CH}^7$ ), 146.6 ( $\text{C}^{8a}$ ), 160.1 ( $\text{CH}^4$ ). IR (Nujol,  $\text{cm}^{-1}$ ):  $\nu(\text{NH})$  3323, 3243,  $\nu(\text{C}=\text{N} + \text{C}=\text{C})$  1626, 1600, 1563. HRMS (ESI)  $m/z$  calcd for  $\text{C}_{36}\text{H}_{32}\text{N}_4[\text{M}]^{2+}$ , 260.1308; found 329.1307;  $m/z$  calcd for  $\text{C}_{36}\text{H}_{31}\text{N}_4[\text{M} - \text{H}]^+$ , 519.2543; found 519.2542. Anal. calcd for  $\text{C}_{38}\text{H}_{32}\text{F}_6\text{N}_4\text{O}_6\text{S}_2$ : C, 55.74; H, 3.94; N, 6.84; S, 7.83. Found: C, 55.65; H, 3.86; N, 6.92; S, 7.73.

**5d** ( $\text{R}^1 = \text{Me}$ ,  $\text{R}^2 = \text{Cy}$ ). To a solution of **2d** (200 mg, 0.92 mmol) in  $\text{CH}_2\text{Cl}_2$  (20 mL) were successively added terephthalaldehyde (62 mg, 0.46 mmol) and HOTf (82  $\mu\text{L}$ , 0.94 mmol). A yellow suspension formed, which was stirred for 3.5 h at room temperature and filtered through a short pad of Celite. The solution was concentrated under vacuum (1 mL),  $\text{Et}_2\text{O}$  (20 mL) was added and the yellow suspension was filtered. The solid collected was washed with  $\text{Et}_2\text{O}$  (3 x 5 mL), dissolved in MeCN (1 mL) and cold  $\text{Et}_2\text{O}$  (30 mL, 0°C) was added; the suspension was stirred at 0 °C for 15 min and then filtered. The solid collected was washed with  $\text{Et}_2\text{O}$  (3 x 5 mL) and dried under vacuum (6 h) to give **5d**·0.5 $\text{H}_2\text{O}$  as a lemon yellow solid consisting of a mixture of isomers in  $RR+SS+RS$  in 1:1:2 molar ratio. Yield: 243.2 mg, 0.29 mmol, 63%. Mp: 193 °C.  $^1\text{H}$

NMR (400 MHz, CD<sub>3</sub>CN, 25 °C):  $\delta$  1.11-1.21 (m, 4 H, CH<sub>2</sub><sup>Cy, RR+SS+RS</sup>), 1.31-1.53 (m, 12 H, CH<sub>2</sub><sup>Cy, RR+SS+RS</sup>), 1.64 (m, 4 H, CH<sub>2</sub><sup>Cy, RR+SS+RS</sup>), 1.73-1.88 (m, 16 H, CH<sub>2</sub><sup>Cy, RR+SS+RS</sup>), 1.95 (m, 4 H, CH<sub>2</sub><sup>Cy, RR+SS+RS</sup>), 2.20 (s, 1 H, H<sub>2</sub>O), 2.88 (s, 6 H, Me<sup>(RR+SS)/RS</sup>), 2.89 (s, 6 H, Me<sup>(RR+SS)/RS</sup>), 4.49 (m, 4 H, CH<sup>Cy, RR+SS+RS</sup>), 6.64 (d, 2 H, H<sup>2, (RR+SS)/RS</sup>, <sup>3</sup>J<sub>HH</sub> = 4.8 Hz), 6.65 (d, 2 H, H<sup>2, (RR+SS)/RS</sup>, <sup>3</sup>J<sub>HH</sub> = 5.2 Hz), 6.86-6.92 (various m, 4 H, H<sup>6+8, RR+SS+RS</sup>), 7.30 (s br, 8 H, C<sub>6</sub>H<sub>4</sub><sup>RR+SS+RS</sup>), 7.43-7.50 (m, 4 H, H<sup>5+7, RR+SS+RS</sup>), 7.72 (s br, 2 H, NH<sup>(RR+SS)/RS</sup>), 7.74 (s br, 2 H, NH<sup>RR or SR</sup>). <sup>1</sup>H NMR (600 MHz, CD<sub>3</sub>CN, 25 °C):  $\delta$  1.13-1.21 (m, 4 H, CH<sub>2</sub><sup>Cy, RR+SS+RS</sup>), 1.30-1.51 (m, 12 H, CH<sub>2</sub><sup>Cy, RR+SS+RS</sup>), 1.64 (m, 4 H, CH<sub>2</sub><sup>Cy, RR+SS+RS</sup>), 1.73-1.87 (m, 16 H, CH<sub>2</sub><sup>Cy, RR+SS+RS</sup>), 1.95 (m, 4 H, CH<sub>2</sub><sup>Cy, RR+SS+RS</sup>), 2.20 (s, 1 H, H<sub>2</sub>O), 2.88 (s, 6 H, Me<sup>(RR+SS)/RS</sup>), 2.89 (s, 6 H, Me<sup>(RR+SS)/RS</sup>), 4.49 (m, 4 H, CH<sup>Cy, RR+SS+RS</sup>), 6.64 (d, 2 H, H<sup>2, (RR+SS)/RS</sup>, <sup>3</sup>J<sub>HH</sub> = 5.4 Hz), 6.65 (d, 2 H, H<sup>2, (RR+SS)/RS</sup>, <sup>3</sup>J<sub>HH</sub> = 4.8 Hz), 6.86-6.92 (various m, 4 H, H<sup>6+8, RR+SS+RS</sup>), 7.30 (s br, 4 H, Tol<sup>(RR+SS)/RS</sup>), 7.31 (s br, 4 H, Tol<sup>(RR+SS)/RS</sup>), 7.44-7.48 (m, 4 H, H<sup>5+7, RR+SS+RS</sup>), 7.72 (d br, 2 H, NH<sup>(RR+SS)/RS</sup>, <sup>3</sup>J<sub>HH</sub> = 3.6 Hz), 7.74 (d br, 2 H, NH<sup>(RR+SS)/RS</sup>, <sup>3</sup>J<sub>HH</sub> = 4.2 Hz). <sup>13</sup>C{<sup>1</sup>H} NMR (100.8 MHz, CD<sub>3</sub>CN, 25 °C):  $\delta$  19.0 (Me), 25.07 (CH<sub>2</sub><sup>Cy, (RR+SS)/RS</sup>), 25.09 (CH<sub>2</sub><sup>Cy, (RR+SS)/RS</sup>), 25.4 (CH<sub>2</sub><sup>Cy</sup>), 25.8 (CH<sub>2</sub><sup>Cy</sup>), 29.94 (CH<sub>2</sub><sup>Cy, (RR+SS)/RS</sup>), 29.96 (CH<sub>2</sub><sup>Cy, (RR+SS)/RS</sup>), 32.50 (CH<sub>2</sub><sup>Cy, (RR+SS)/RS</sup>), 32.53 (CH<sub>2</sub><sup>Cy, (RR+SS)/RS</sup>), 65.0 (CH<sup>2, (RR+SS)/RS</sup>), 65.7 (CH<sup>2, (RR+SS)/RS</sup>), 117.50 (CH<sup>8, (RR+SS)/RS</sup>), 117.54 (CH<sup>8, (RR+SS)/RS</sup>), 117.91 (C<sup>4a, (RR+SS)/RS</sup>), 117.93 (C<sup>4a, (RR+SS)/RS</sup>), 121.36 (CH<sup>6, (RR+SS)/RS</sup>), 121.37 (CH<sup>6, (RR+SS)/RS</sup>), 122.1 (q, <sup>1</sup>J<sub>CF</sub> = 320 Hz, CF<sub>3</sub>SO<sub>3</sub>), 127.6 (CH), 131.35 (CH<sup>5, (RR+SS)/RS</sup>), 131.37 (CH<sup>5, (RR+SS)/RS</sup>), 138.46 (C<sup>7, (RR+SS)/RS</sup>), 138.47 (C<sup>7, (RR+SS)/RS</sup>), 140.0 (CH), 145.50 (C<sup>8a, (RR+SS)/RS</sup>), 145.55 (C<sup>8a, (RR+SS)/RS</sup>), 172.32 (C<sup>4, (RR+SS)/RS</sup>), 172.33 (C<sup>4, (RR+SS)/RS</sup>). <sup>13</sup>C{<sup>1</sup>H} NMR (150.9 MHz, CD<sub>3</sub>CN, 25 °C):  $\delta$  19.0 (Me), 25.10 (CH<sub>2</sub><sup>Cy, (RR+SS)/RS</sup>), 25.12 (CH<sub>2</sub><sup>Cy, (RR+SS)/RS</sup>), 25.4 (CH<sub>2</sub><sup>Cy</sup>), 25.8 (CH<sub>2</sub><sup>Cy</sup>), 29.99 (CH<sub>2</sub><sup>Cy, (RR+SS)/RS</sup>), 30.00 (CH<sub>2</sub><sup>Cy, (RR+SS)/RS</sup>), 32.54 (CH<sub>2</sub><sup>Cy, (RR+SS)/RS</sup>), 32.56 (CH<sub>2</sub><sup>Cy, (RR+SS)/RS</sup>), 65.0 (CH<sup>2, (RR+SS)/RS</sup>), 65.8 (CH<sup>2, (RR+SS)/RS</sup>), 117.53

(CH<sup>8, (RR+SS)/RS</sup>), 117.57 (CH<sup>8, (RR+SS)/RS</sup>), 117.95 (C<sup>4a, (RR+SS)/RS</sup>), 117.97 (C<sup>4a, (RR+SS)/RS</sup>), 121.4 (CH<sup>6, RR+SS+RS</sup>), 122.1 (q, <sup>1</sup>J<sub>CF</sub> = 320 Hz, CF<sub>3</sub>SO<sub>3</sub>), 127.6 (CH), 131.35 (CH<sup>5, (RR+SS)/RS</sup>), 131.37 (CH<sup>5, (RR+SS)/RS</sup>), 138.5 (C<sup>7, RR+SS+RS</sup>), 140.0 (C), 145.53 (C<sup>8a, RR+SS+RS</sup>), 172.34 (C<sup>4, (RR+SS)/RS</sup>), 172.35 (C<sup>4, (RR+SS)/RS</sup>). IR (Nujol, cm<sup>-1</sup>): ν(NH) 3235, ν(C=N + C=C) 1621, 1587, 1557. HRMS (ESI) *m/z* calcd for C<sub>36</sub>H<sub>44</sub>N<sub>4</sub> [M]<sup>2+</sup>, 266.1778; found 266.1778. Anal. calcd for C<sub>38</sub>H<sub>44</sub>F<sub>6</sub>N<sub>4</sub>O<sub>6</sub>S<sub>2</sub>·0.5H<sub>2</sub>O: C, 54.34; H, 5.40; N, 6.67; S, 7.64. Found: C, 54.27; H, 5.39; N, 6.69; S, 7.57.

**<sup>1</sup>H and <sup>13</sup>C{<sup>1</sup>H} NMR assignment for 6d·H<sub>2</sub>O:** <sup>1</sup>H NMR (600 MHz, CD<sub>2</sub>Cl<sub>2</sub>, 25 °C): δ 1.19 (m, 6 H, CH<sub>2</sub><sup>Cy</sup>), 1.48 (m, 18 H, CH<sub>2</sub><sup>Cy</sup>), 1.66-1.75 (various m, 12 H, CH<sub>2</sub><sup>Cy</sup>), 1.92-2.05 (various m + br s, 28 H, CH<sub>2</sub><sup>Cy</sup> + H<sub>2</sub>O), 2.96 (s, 18 H, Me), 4.53 (m, 6 H, CH<sup>Cy</sup>), 6.66 (m, 6 H), 6.83 (m, 12 H), 6.88 (d, 6 H, <sup>3</sup>J<sub>HH</sub> = 6.6 Hz), 6.98–7.00 (m, 12 H), 7.18–7.25 (m, 6 H), 7.43 (d, 12 H, <sup>3</sup>J<sub>HH</sub> = 7.8 Hz), 7.58–7.60 (m 6 H), 8.19 (d, 2 H, NH, <sup>3</sup>J<sub>HH</sub> = 4.8 Hz), 8.22 (d, 3 H, NH, <sup>3</sup>J<sub>HH</sub> = 4.8 Hz), 8.25 (br d, 1 H, NH). <sup>1</sup>H NMR (600 MHz, CD<sub>2</sub>Cl<sub>2</sub>, -10 °C): δ 1.14 (m, 6 H, CH<sub>2</sub><sup>Cy</sup>), 1.43 (m, 18 H, CH<sub>2</sub><sup>Cy</sup>), 1.63–1.69 (various m, 12 H, CH<sub>2</sub><sup>Cy</sup>), 1.90-2.00 (various m, 24 H, CH<sub>2</sub><sup>Cy</sup>), 2.22-2.71 (br s, 4 H, H<sub>2</sub>O), 2.93 (s br, 12 H, Me), 2.94 (s br, 6 H, Me), 4.49 (m, 6 H, CH<sup>Cy</sup>), 6.59 (m, 6 H), 6.79–6.85 (various m, 18 H), 6.70 (m, 12 H), 7.16 (m, 6 H), 7.41 (m, 12 H), 7.55 (m, 12 H), 8.17 (s br, 1 H, NH), 8.24 (s br, 5 H, NH). <sup>13</sup>C{<sup>1</sup>H} NMR (100.8 MHz, CD<sub>2</sub>Cl<sub>2</sub>, 25 °C): δ 18.51 (Me), 18.52 (Me), 24.7 (CH<sub>2</sub><sup>Cy</sup>), 25.13 (CH<sub>2</sub><sup>Cy</sup>), 25.19 (CH<sub>2</sub><sup>Cy</sup>), 25.6 (CH<sub>2</sub><sup>Cy</sup>), 29.89 (CH<sub>2</sub><sup>Cy</sup>), 29.94 (CH<sub>2</sub><sup>Cy</sup>), 32.48 (CH<sub>2</sub><sup>Cy</sup>), 64.50 (CH), 64.56 (CH), 65.46 (CH), 65.53 (CH), 117.09 (C), 117.11 (C), 117.16 (CH), 117.29 (CH), 120.5 (CH), 121.1 (q, <sup>1</sup>J<sub>CF</sub> = 320 Hz, CF<sub>3</sub>SO<sub>3</sub>), 125.0 (CH), 127.12 (CH), 127.23 (CH), 127.68 (CH), 127.83 (CH), 130.0 (CH), 130.4 (CH), 135.6 (C), 139.12 (CH), 139.17 (CH), 140.95 (C), 140.96 (C), 140.98 (C), 141.53 (C), 141.56 (C), 145.28 (C), 145.31 (C), 145.40 (C), 170.08 (C), 170.09 (C). <sup>13</sup>C{<sup>1</sup>H} NMR (150.9 MHz, CD<sub>2</sub>Cl<sub>2</sub>, -10 °C): δ 18.29 (Me<sup>(RRR+SSS)/(RRS+SSR)</sup>), 18.32



(Me<sup>RRR+SSS+RRS+SSR</sup>), 24.4 (CH<sub>2</sub><sup>Cy</sup>), 24.6 (CH<sub>2</sub><sup>Cy</sup>), 24.8 (CH<sub>2</sub><sup>Cy</sup>), 25.3 (CH<sub>2</sub><sup>Cy</sup>), 29.37 (CH<sub>2</sub><sup>Cy</sup>), 29.4 (CH<sub>2</sub><sup>Cy</sup>), 30.5 (CH<sub>2</sub><sup>Cy</sup>), 32.02 (CH<sub>2</sub><sup>Cy</sup>), 32.07 (CH<sub>2</sub><sup>Cy</sup>), 64.00 (CH<sub>2</sub><sup>2, RRR+SSS+RRS+SSR</sup>), 64.04 (CH<sub>2</sub><sup>2, (RRR+SSS)/(RRS+SSR)</sup>), 64.9 (CH<sup>Cy</sup>), 116.66 (C<sup>4a</sup>), 116.74 (CH<sup>8a</sup>), 120.1 (CH<sup>6</sup>), 120.7 (q, <sup>1</sup>J<sub>CF</sub> = 320 Hz, CF<sub>3</sub>SO<sub>3</sub>), 124.8 (CH), 126.9 (CH), 127.39 (CH), 127.51 (CH), 129.8 (CH<sup>5</sup>), 135.3 (C), 138.8 (CH), 140.64 (C), 140.70 (C), 141.12 (C), 141.15 (C), 144.87 (C<sup>8a</sup>), 144.94 (C<sup>8a</sup>), 169.7 (C<sup>4</sup>).

**<sup>1</sup>H and <sup>13</sup>C{<sup>1</sup>H} NMR assignment for 7d2:** <sup>1</sup>H NMR (400 MHz, CDCl<sub>3</sub>, 25 °C, TMS): δ 1.25 (m, 2 H, CH<sub>2</sub><sup>Cy</sup>), 1.63-2.01 (various m, 8.4 H, CH<sub>2</sub><sup>Cy</sup> + H<sub>2</sub>O), 2.38 (s, 3 H, Me), 3.02, 3.20 (AB part of an ABX system, 2 H, CH<sub>2</sub>, <sup>2</sup>J<sub>AB</sub> = 16.7 Hz, <sup>3</sup>J<sub>BX</sub> = 13.8 Hz, <sup>3</sup>J<sub>BX</sub> = 4.2 Hz), 3.72 (m, 1 H, CH<sup>Cy</sup>), 4.69 (dd, X part of an ABX system, 1 H, H<sup>2</sup>, <sup>3</sup>J<sub>HH</sub> = 13.2 Hz, <sup>3</sup>J<sub>HH</sub> = 4.0 Hz), 5.43 (v br s, N<sup>1</sup>H), 6.78-6.83 (m, 2 H, H<sup>6+8</sup>), 7.24 (d, 2 H, *m*-Tol, <sup>3</sup>J<sub>HH</sub> = 7.6 Hz), 7.38 (m, 3 H, *o*-Tol + H<sup>7</sup>), 8.19 (d, 1 H, H<sup>5</sup>, <sup>3</sup>J<sub>HH</sub> = 8.4 Hz), 10.70 (s br, 1 H, N<sup>2</sup>H). <sup>13</sup>C{<sup>1</sup>H} NMR (100.8 MHz, CDCl<sub>3</sub>, 25 °C, TMS): δ 21.2 (Me), 24.2 (CH<sub>2</sub><sup>Cy</sup>), 24.6 (CH<sub>2</sub><sup>Cy</sup>), 24.7 (CH<sub>2</sub><sup>Cy</sup>), 30.8 (CH<sub>2</sub><sup>Cy</sup>), 31.0 (CH<sub>2</sub><sup>Cy</sup>), 35.4 (CH<sub>2</sub>), 55.5 (CH<sub>2</sub>), 57.8 (CH<sup>Cy</sup>), 110.0 (C<sup>4a</sup>), 117.3 (CH<sup>8</sup>), 119.8 (CH<sup>6</sup>), 126.6 (*o*-Tol), 127.5 (CH<sup>5</sup>), 130.0 (*m*-Tol), 135.5 (*p*-Tol), 138.9 (CH<sup>7</sup>), 139.3 (Tol<sup>i</sup>), 152.4 (C<sup>8a</sup>), 171.0 (C<sup>4</sup>).

**<sup>1</sup>H and <sup>13</sup>C{<sup>1</sup>H} NMR assignment for 7d5:** <sup>1</sup>H NMR (400 MHz, CDCl<sub>3</sub>, 25 °C, TMS): δ 1.30 (m, 3 H, CH<sub>2</sub><sup>Cy</sup>), 1.63-1.99 (various m, 8.5 H, CH<sub>2</sub><sup>Cy</sup> + H<sub>2</sub>O), 3.26, 2.95 (AB part of an ABX system, 1 H, CH<sub>2</sub>, <sup>2</sup>J<sub>AB</sub> = 14.2 Hz, <sup>3</sup>J<sub>BX</sub> = 13.8 Hz, <sup>3</sup>J<sub>BX</sub> = 2.2 Hz), 3.77 (m, 1 H, CH<sup>Cy</sup>), 4.22-4.30 (m, 9 H, Fc), 4.42 (d br, X part of an ABX system, 1 H, H<sup>2</sup>, <sup>3</sup>J<sub>HH</sub> = 7.6 Hz), 5.83 (s, 1 H, N<sup>1</sup>H), 6.73 (t, 1 H, H<sup>6</sup>, <sup>3</sup>J<sub>HH</sub> = 7.6 Hz), 6.84 (d, 1 H, H<sup>8</sup>, <sup>3</sup>J<sub>HH</sub> = 8.4 Hz), 7.35 (t, 1 H, H<sup>7</sup>, <sup>3</sup>J<sub>HH</sub> = 7.6 Hz), 8.12 (d, 1 H, H<sup>5</sup>, <sup>3</sup>J<sub>HH</sub> = 8.4 Hz), 10.50 (s br, 1 H, N<sup>2</sup>H). <sup>13</sup>C{<sup>1</sup>H} NMR (100.8 MHz, CDCl<sub>3</sub>, 25 °C, TMS): δ 24.2 (CH<sub>2</sub><sup>Cy</sup>), 24.7 (CH<sub>2</sub><sup>Cy</sup>), 24.8 (CH<sub>2</sub><sup>Cy</sup>), 30.9 (CH<sub>2</sub><sup>Cy</sup>), 31.1 (CH<sub>2</sub><sup>Cy</sup>), 34.8 (CH<sub>2</sub>), 50.2 (CH<sub>2</sub>), 57.5 (CH<sup>Cy</sup>), 66.4 (CH<sup>Fc</sup>), 67.0

(CH<sup>Fc</sup>), 68.9 (CH<sup>Fc</sup>), 109.6 (C<sup>4a</sup>), 117.2 (CH<sup>8</sup>), 119.2 (CH<sup>6</sup>), 127.1 (CH<sup>5</sup>), 138.8 (CH<sup>7</sup>), 151.9 (C<sup>8a</sup>), 171.0 (C<sup>4</sup>).

**<sup>1</sup>H and <sup>13</sup>C{<sup>1</sup>H} NMR assignment for 7e2·0.5H<sub>2</sub>O (RR and RS isomers, D and d, in a 5:1 molar ratio):** <sup>1</sup>H NMR (400 MHz, CDCl<sub>3</sub>, 25 °C, TMS): δ 1.69-1.82 (very broad s, 1 H, H<sub>2</sub>O), 1.76 (d, 3 H, CH(Me)Ph<sup>D</sup>, <sup>3</sup>J<sub>HH</sub> = 6.8 Hz), 1.80 (d, 3 H, CH(Me)Ph<sup>d</sup>, <sup>3</sup>J<sub>HH</sub> = 6.4 Hz), 2.25 (s, 3 H, Me<sup>Tol, d</sup>), 2.28 (s, 3 H, Me<sup>Tol, D</sup>), 2.68, 3.32 (AB part of an ABX system, 2 H, CH<sub>2</sub><sup>d</sup>, <sup>2</sup>J<sub>AB</sub> = 16.8 Hz, <sup>3</sup>J<sub>BX</sub> = 12.2 Hz, <sup>3</sup>J<sub>AX</sub> = 5.4 Hz), 2.94, 3.14 (AB part of an ABX system, 2 H, CH<sub>2</sub><sup>D</sup>, <sup>2</sup>J<sub>AB</sub> = 16.7 Hz, <sup>3</sup>J<sub>BX</sub> = 12.6 Hz, <sup>3</sup>J<sub>AX</sub> = 4.2 Hz), 4.34 (dd, X part of an ABX system, 1 H, H<sup>2, D</sup>, <sup>3</sup>J<sub>HH</sub> = 12.6 Hz, <sup>3</sup>J<sub>HH</sub> = 4.6 Hz), 4.61 (dd, X part of an ABX system, 1 H, H<sup>2, d</sup>, <sup>3</sup>J<sub>HH</sub> = 12.0 Hz, <sup>3</sup>J<sub>HH</sub> = 4.8 Hz), 4.98 (“quint”, 1 H, CH(Me)Ph<sup>D</sup>, <sup>3</sup>J<sub>HH</sub> = 6.8 Hz), 5.14 (m, 1 H, CH(Me)Ph<sup>d</sup>, <sup>3</sup>J<sub>HH</sub> = 7.0 Hz), 5.94 (s v br, 2 H, N<sup>1</sup>H<sup>D+d</sup>), 6.67 (m, 2 H, H<sup>6, D+d</sup>), 6.77 (d, 1H, H<sup>8, d</sup>, <sup>3</sup>J<sub>HH</sub> = 8.8 Hz), 6.81 (d, 1H, H<sup>8, D</sup>, <sup>3</sup>J<sub>HH</sub> = 8.4 Hz), 6.98 (d, 2 H, *m*-Tol<sup>d</sup>), 7.04-7.42 (several m, 18 H, *o*-Tol<sup>D+d</sup> + *m*-Tol<sup>D</sup> + Ph<sup>D+d</sup> + H<sup>5, D+d</sup>), 8.17 (d overlapped d, 2 H, H<sup>7, D+d</sup>, <sup>3</sup>J<sub>HH</sub> = 8.0 Hz), 10.71 (v br d, 1 H, N<sup>2</sup>H<sup>d</sup>, <sup>3</sup>J<sub>HH</sub> = 6.8 Hz), 10.86 (v br d, 1 H, N<sup>2</sup>H<sup>D</sup>, <sup>3</sup>J<sub>HH</sub> = 6.4 Hz). <sup>13</sup>C{<sup>1</sup>H} NMR (100.8 MHz, CDCl<sub>3</sub>, 25 °C, TMS): δ 21.02 (Me<sup>d</sup>), 21.04 (Me<sup>D</sup>), 21.8 (Me<sup>D</sup>), 21.9 (Me<sup>d</sup>), 34.9 (CH<sub>2</sub><sup>d</sup>), 35.5 (CH<sub>2</sub><sup>D</sup>), 53.9 (CH<sup>2, d</sup>), 54.6 (CH<sup>2, D</sup>), 57.7 (CH(Me)Ph<sup>d</sup>), 57.9 (CH(Me)Ph<sup>D</sup>), 109.4 (C<sup>4a, d</sup>), 109.5 (C<sup>4a, D</sup>), 117.5 (CH<sup>8, d</sup>), 117.6 (CH<sup>8, D</sup>), 119.1 (CH<sup>6, d</sup>), 119.3 (CH<sup>6, D</sup>), 120.4 (q, <sup>1</sup>J<sub>CF</sub> = 320 Hz, CF<sub>3</sub>SO<sub>3</sub>), 126.1 (*o*-Tol<sup>D+d</sup> or Ph<sup>D+d</sup>), 126.2 (*o*-Tol<sup>D+d</sup> or Ph<sup>D+d</sup>), 127.1 (CH<sup>5, d</sup>), 127.3 (CH<sup>5, D</sup>), 128.3 (*p*-Ph<sup>d</sup>), 128.7 (*p*-Ph<sup>D</sup>), 129.3 (*m*-Ph), 129.5 (Ph<sup>D</sup>), 129.6 (*m*-Tol<sup>d</sup>), 129.8 (*m*-Tol<sup>D</sup>), 135.1 (*p*-Tol<sup>D+d</sup>), 138.4 (*i*-Tol<sup>d</sup>), 138.8 (*i*-Tol<sup>D</sup>), 139.1 (CH<sup>7, d</sup>), 139.3 (CH<sup>7, D</sup>), 139.7 (*i*-Ph<sup>D</sup>), 139.9 (*i*-Ph<sup>d</sup>), 152.9 (C<sup>8a, d</sup>), 153.0 (C<sup>8a, D</sup>), 172.8 (C<sup>4, d</sup>), 173.1 (C<sup>4, D</sup>)

$^1\text{H}$  NMR spectra of **1a** (300 MHz,  $\text{CDCl}_3$ , 25 °C, TMS).

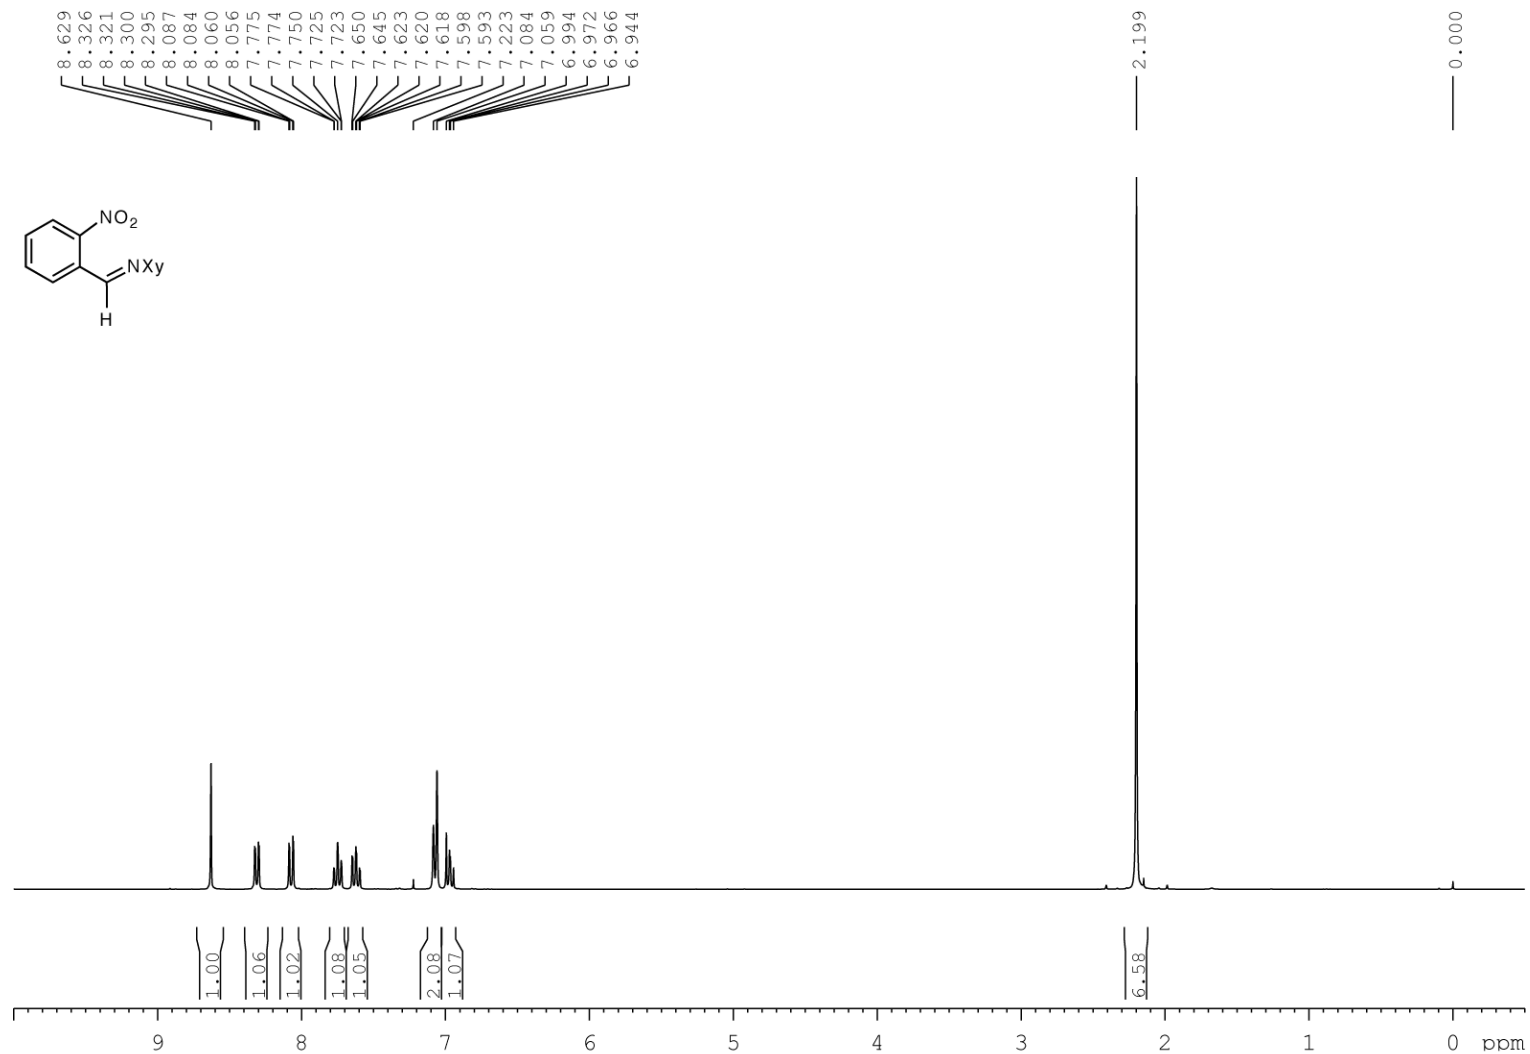

$^{13}\text{C}\{^1\text{H}\}$  NMR APT spectra of **1a** (75.5 MHz,  $\text{CDCl}_3$ , 25 °C, TMS).

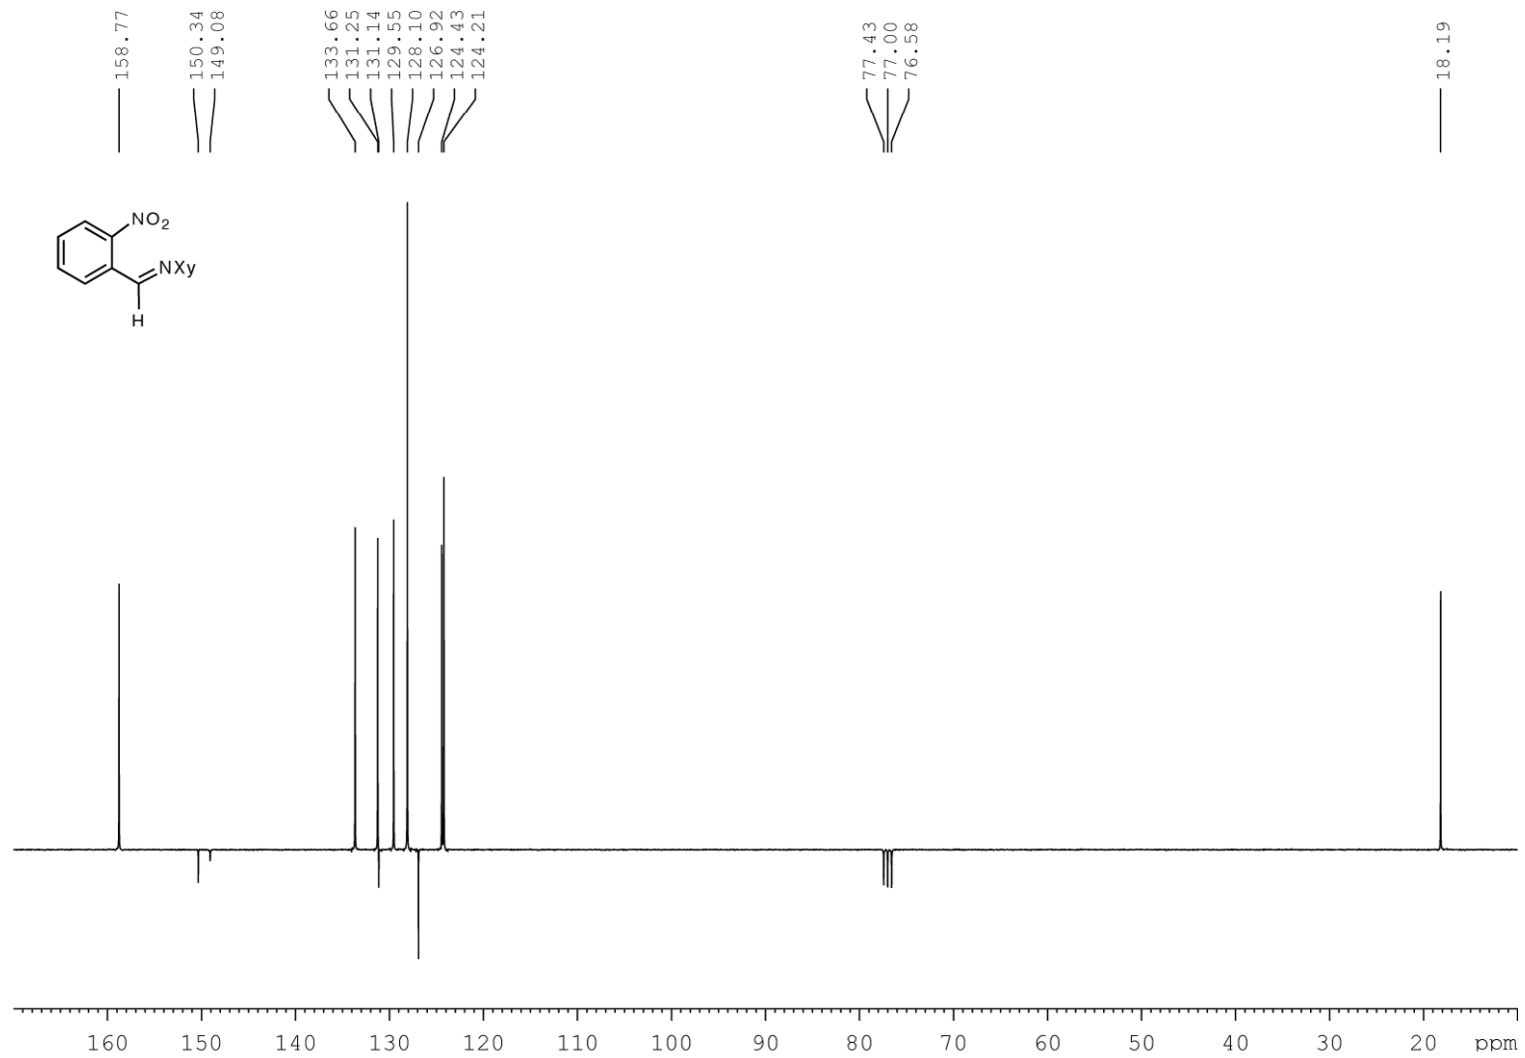

$^1\text{H}$  NMR spectra of **1b** (400 MHz,  $\text{CDCl}_3$ , 25 °C, TMS).

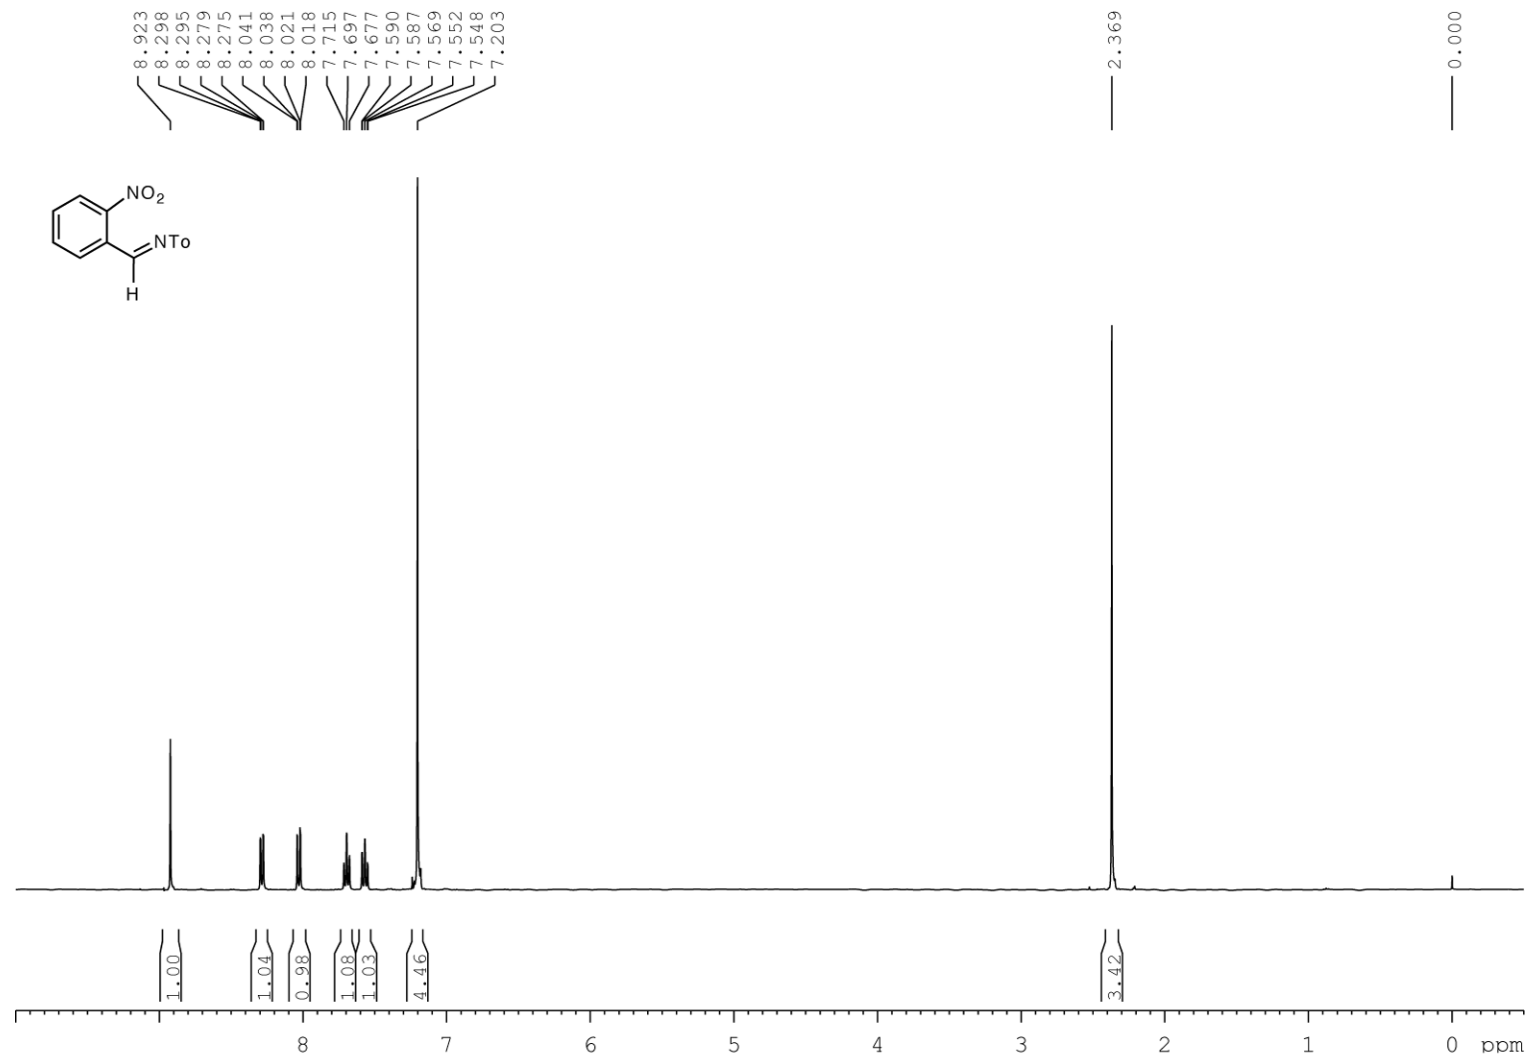

$^{13}\text{C}\{^1\text{H}\}$  NMR APT spectra of **1b** (100.8 MHz,  $\text{CDCl}_3$ , 25 °C, TMS).

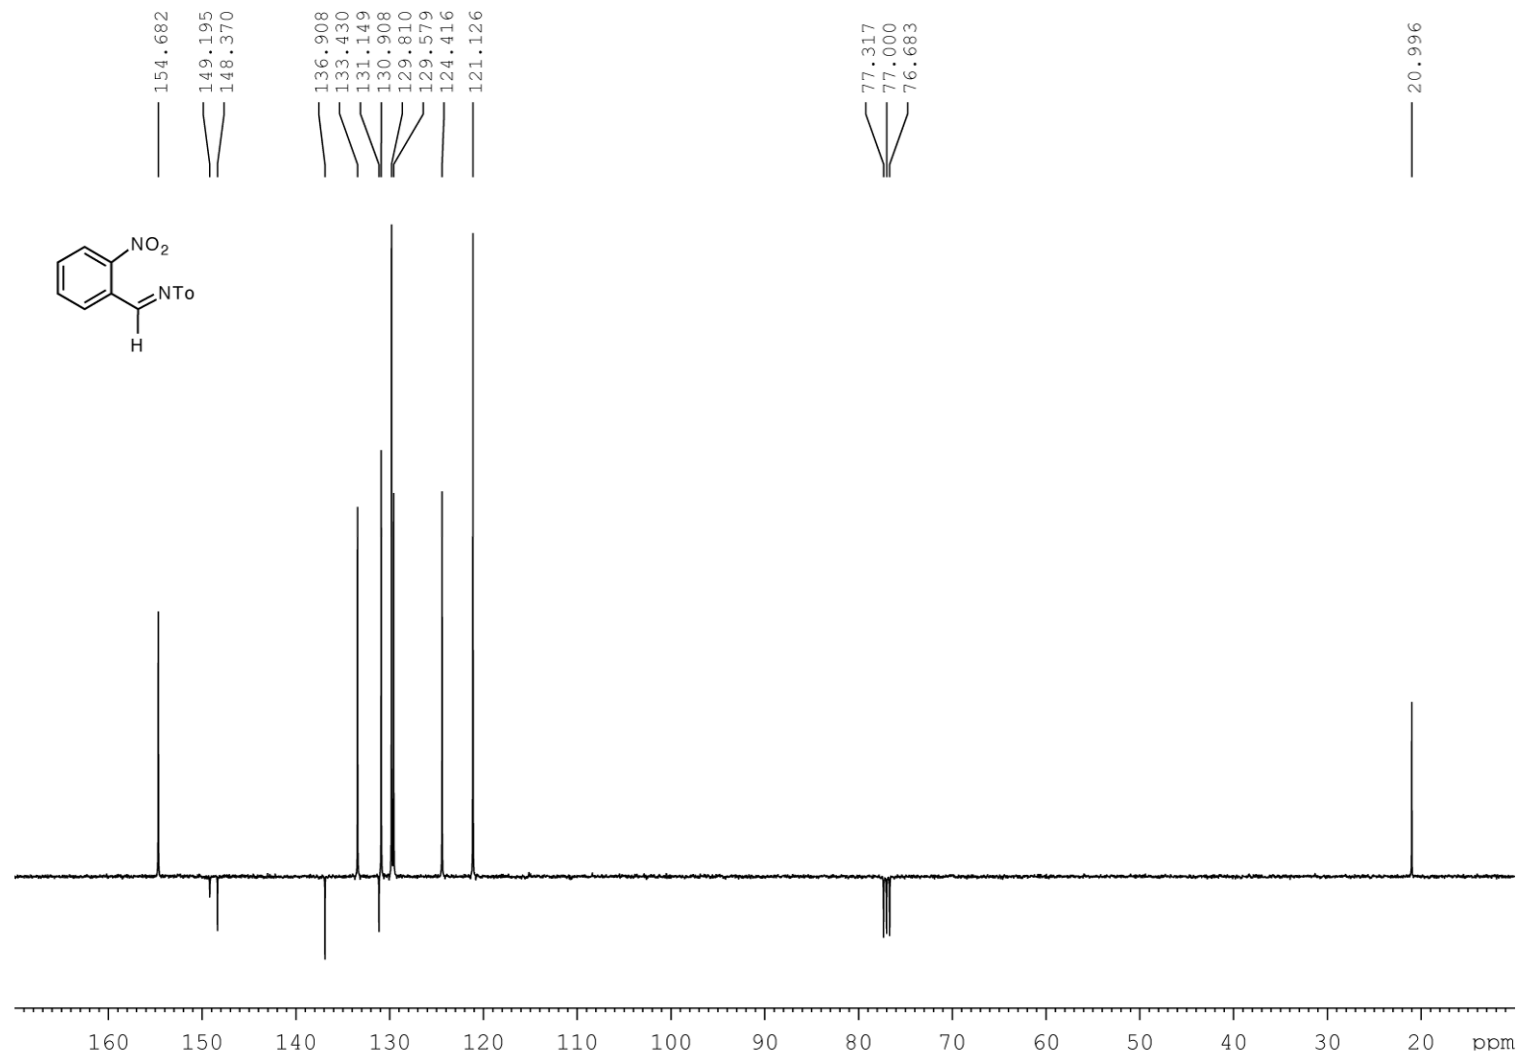

$^1\text{H}$  NMR spectra of **2a**·0.3H<sub>2</sub>O (400 MHz, CDCl<sub>3</sub>, 25 °C, TMS).

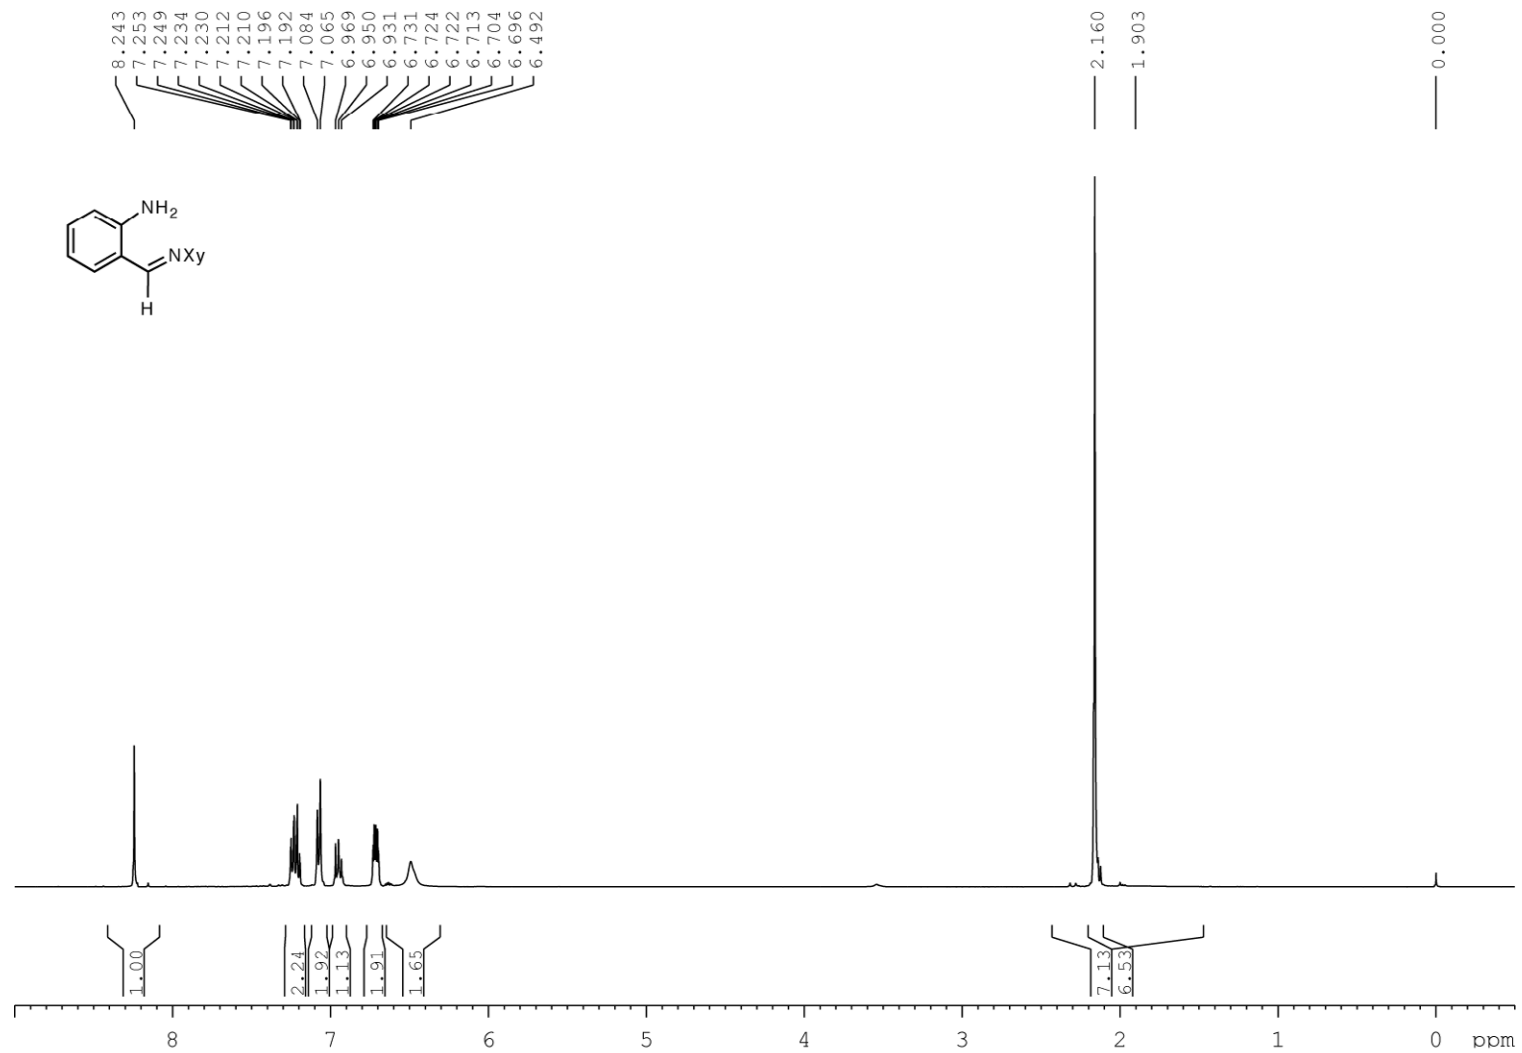

$^{13}\text{C}\{^1\text{H}\}$  NMR APT spectra of **2a** (75.4 MHz,  $\text{CDCl}_3$ , 25 °C, TMS).

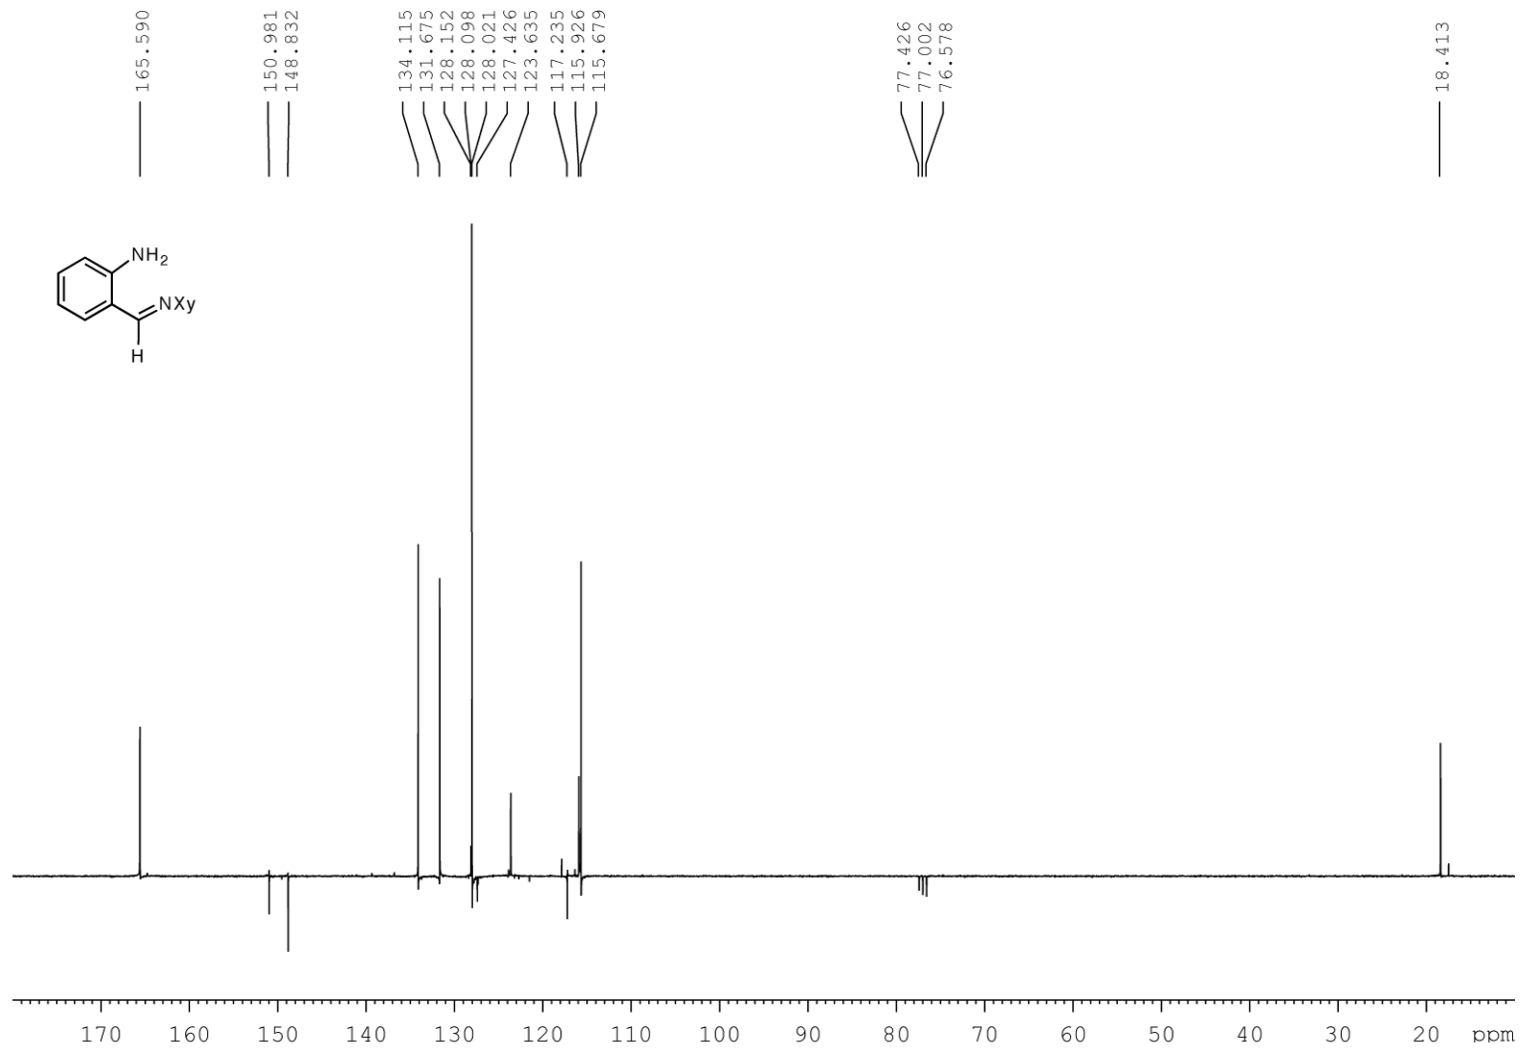



$^1\text{H}$  NMR spectra of **2b**·0.1H<sub>2</sub>O (400 MHz, CDCl<sub>3</sub>, 25 °C, TMS).

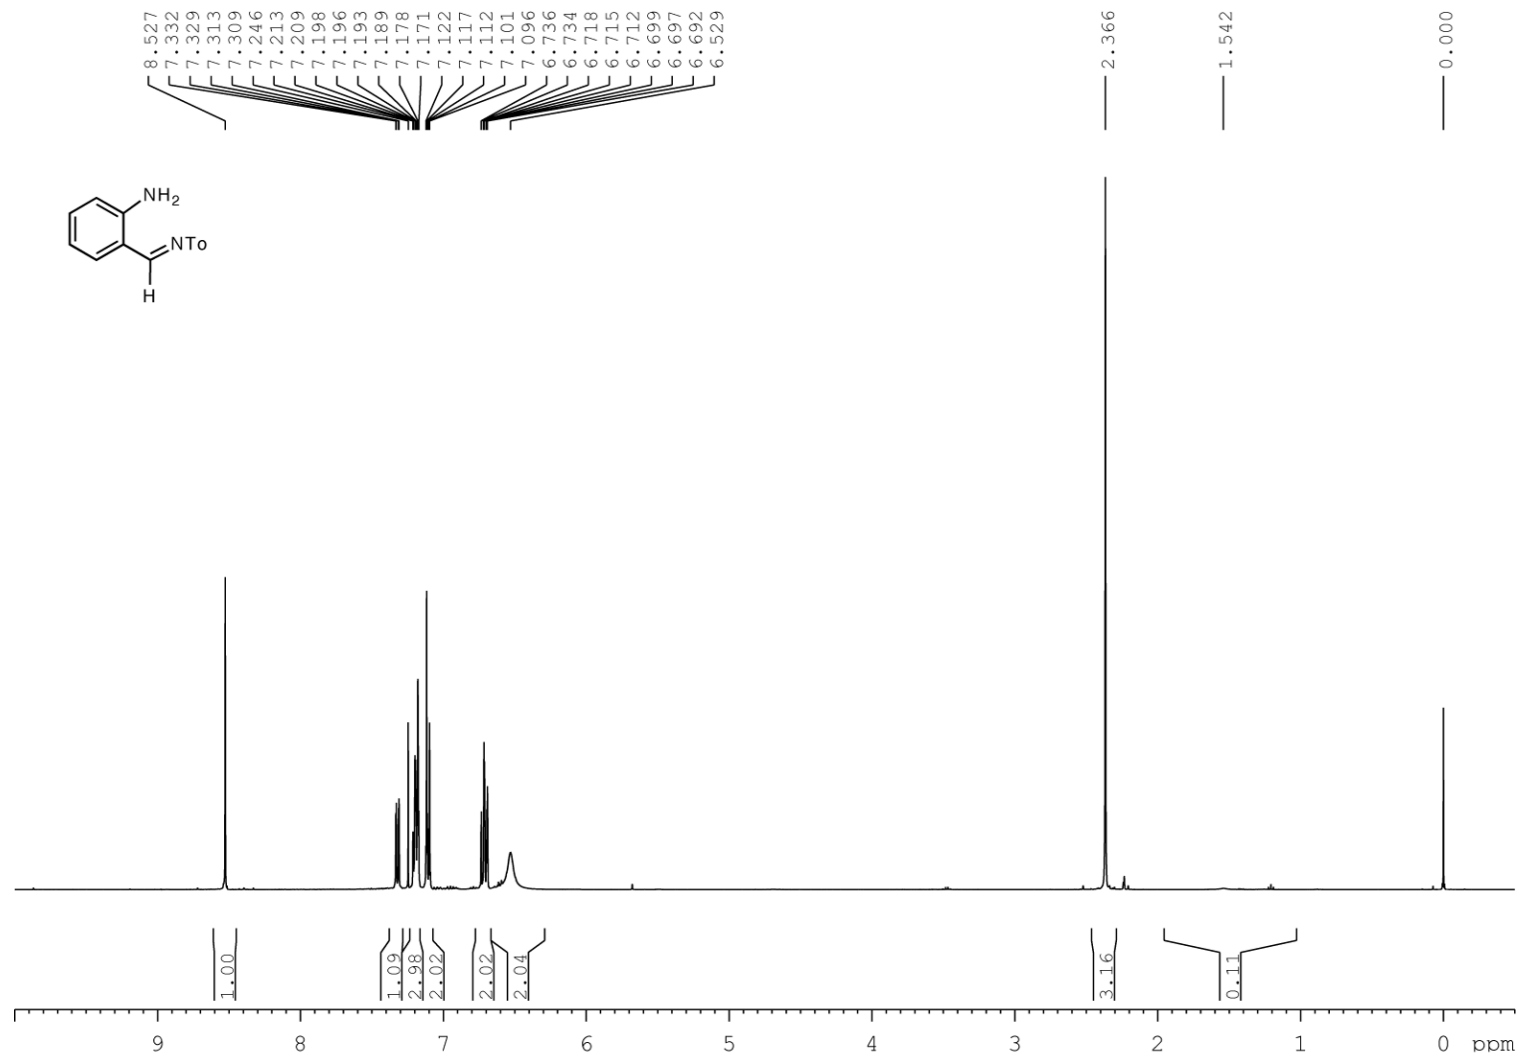

$^{13}\text{C}\{^1\text{H}\}$  NMR APT spectra of **2b** (100.8 MHz,  $\text{CDCl}_3$ , 25 °C, TMS).

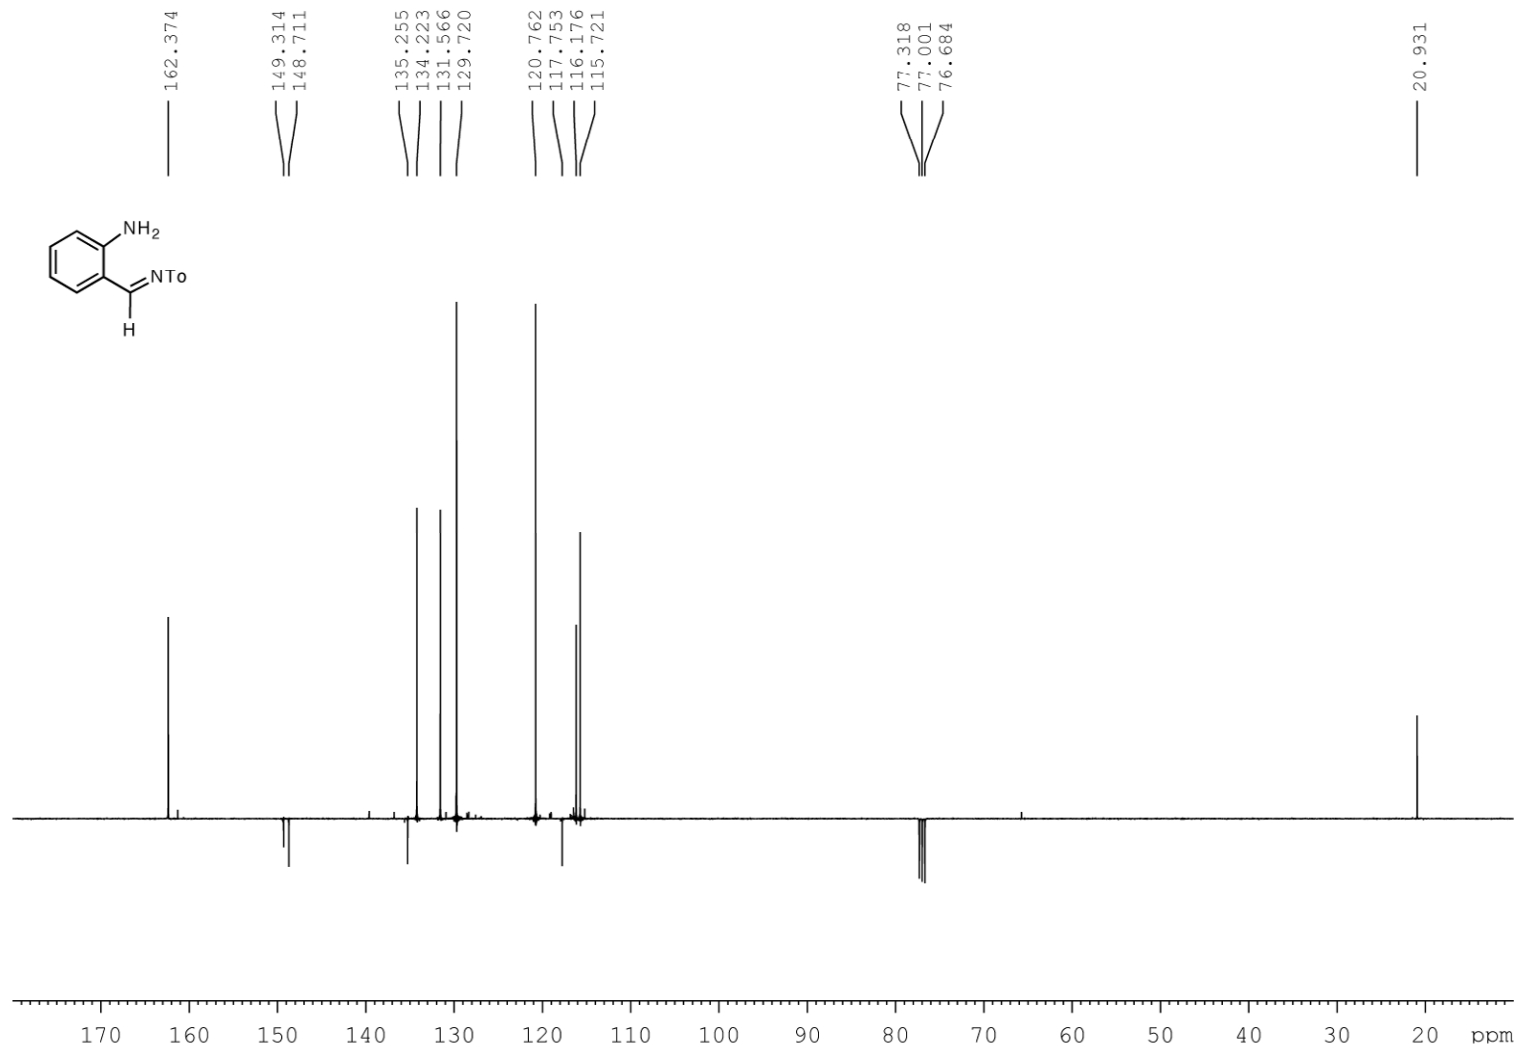

$^1\text{H}$  NMR spectra of **2c** (300 MHz,  $\text{CDCl}_3$ , 25 °C, TMS).

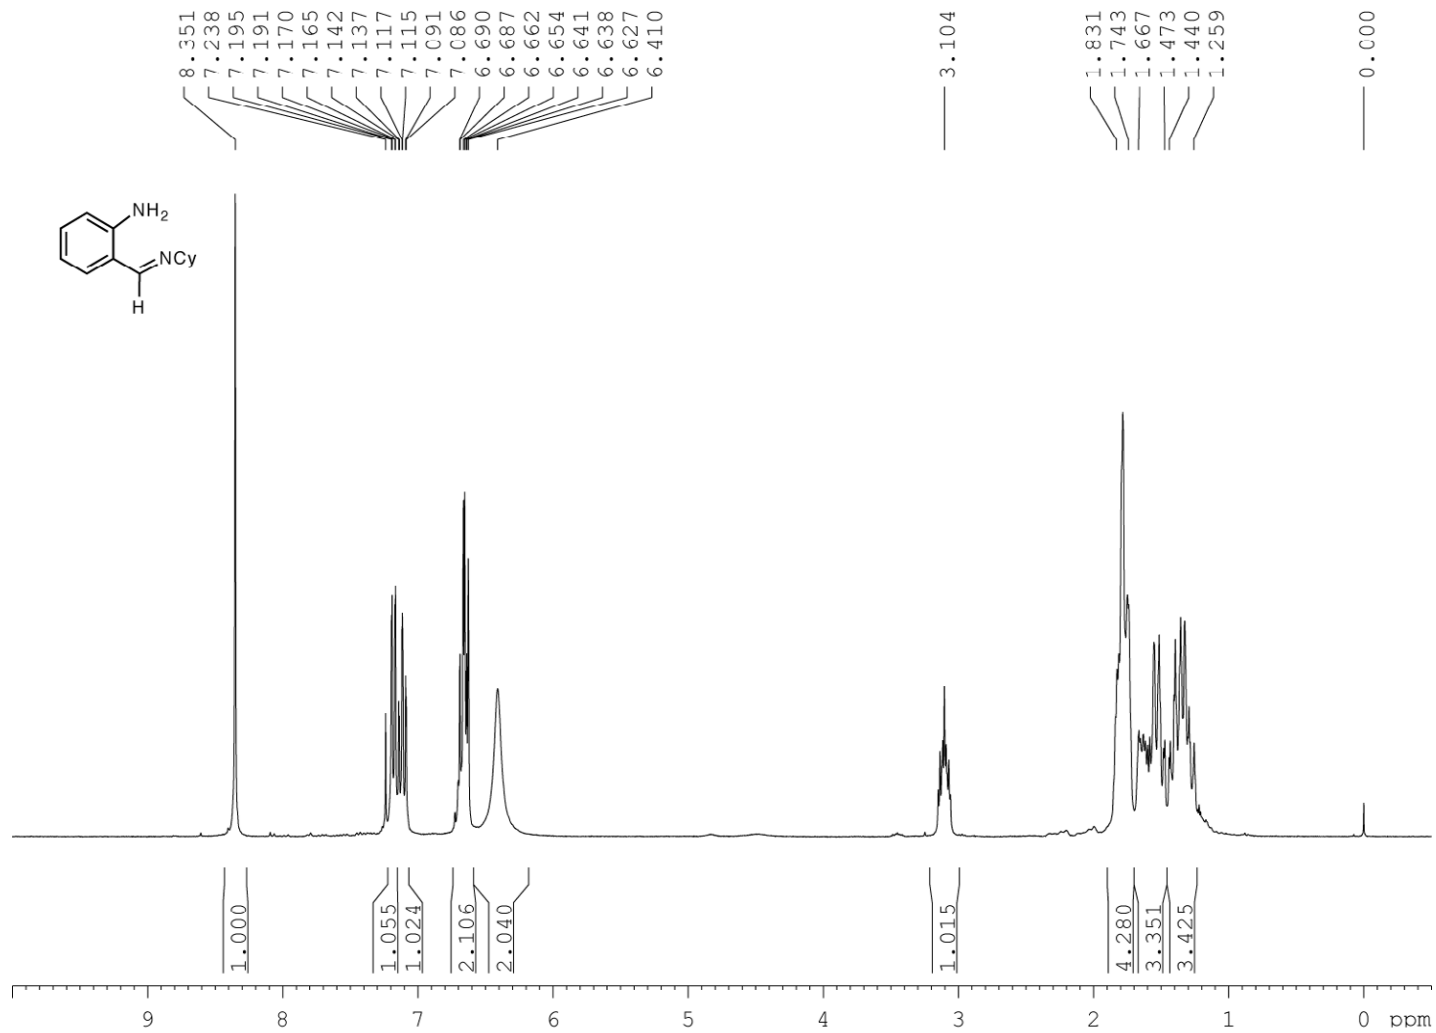

$^{13}\text{C}\{^1\text{H}\}$  NMR APT spectra of **2c** (75.5 MHz,  $\text{CDCl}_3$ , 25 °C, TMS).

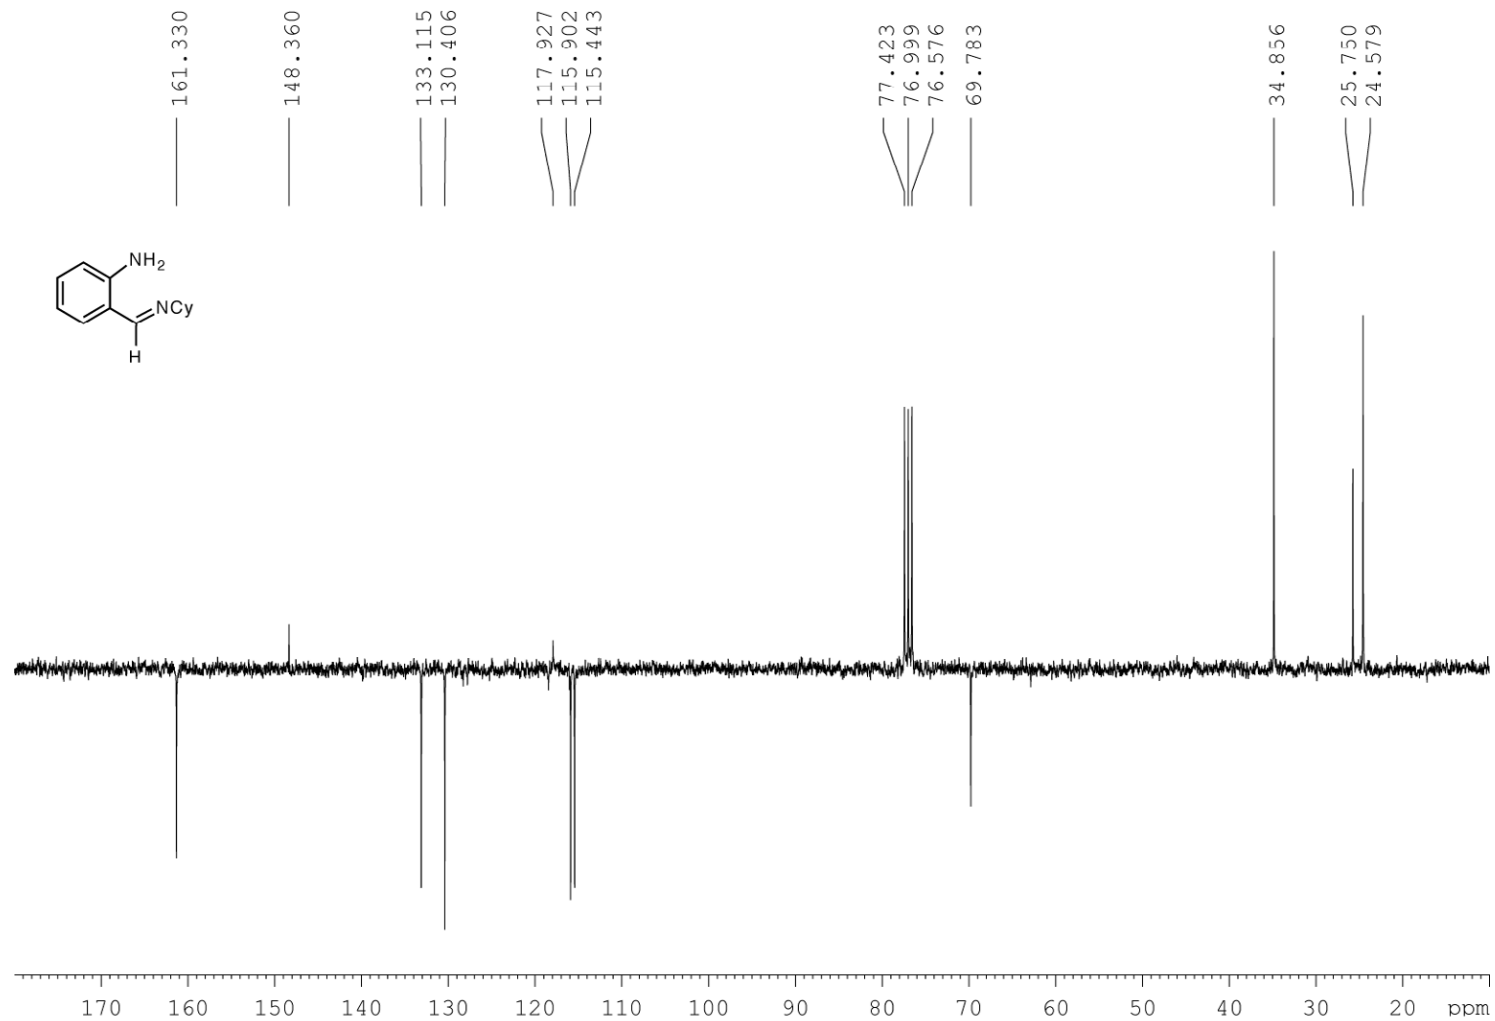

$^1\text{H}$  NMR spectra of **2d**·0.1H<sub>2</sub>O (400 MHz, CDCl<sub>3</sub>, 25 °C, TMS).

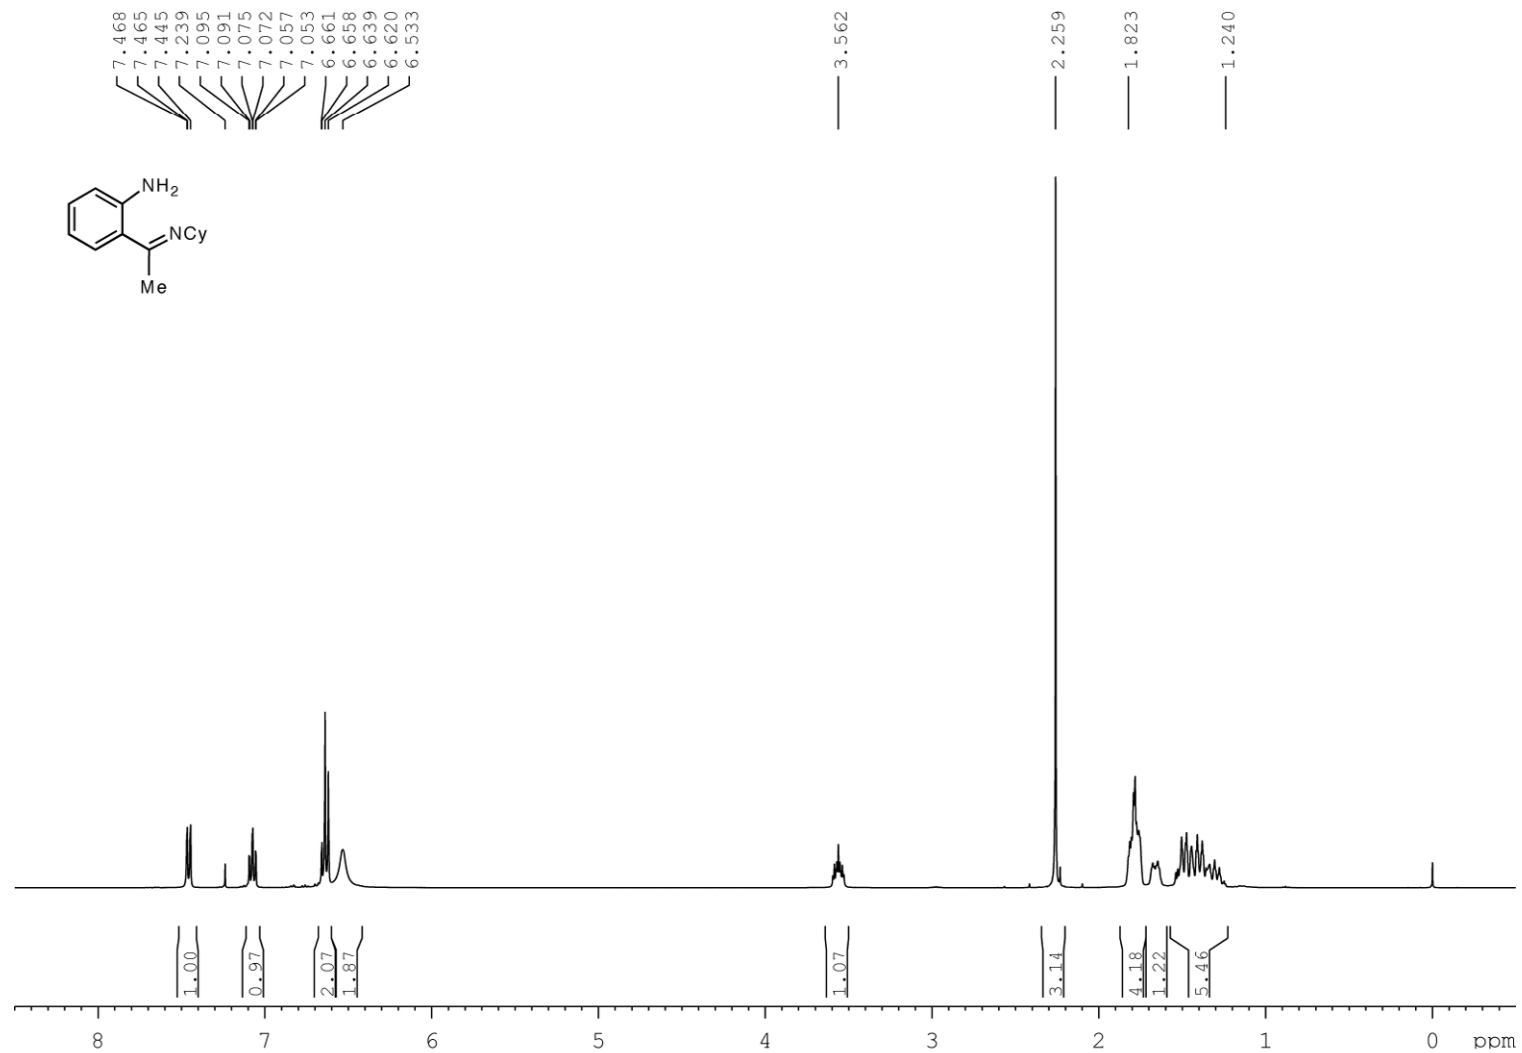

$^{13}\text{C}\{^1\text{H}\}$  NMR APT spectra of **2d**·0.1H<sub>2</sub>O (100.8 MHz, CDCl<sub>3</sub>, 25 °C, TMS).

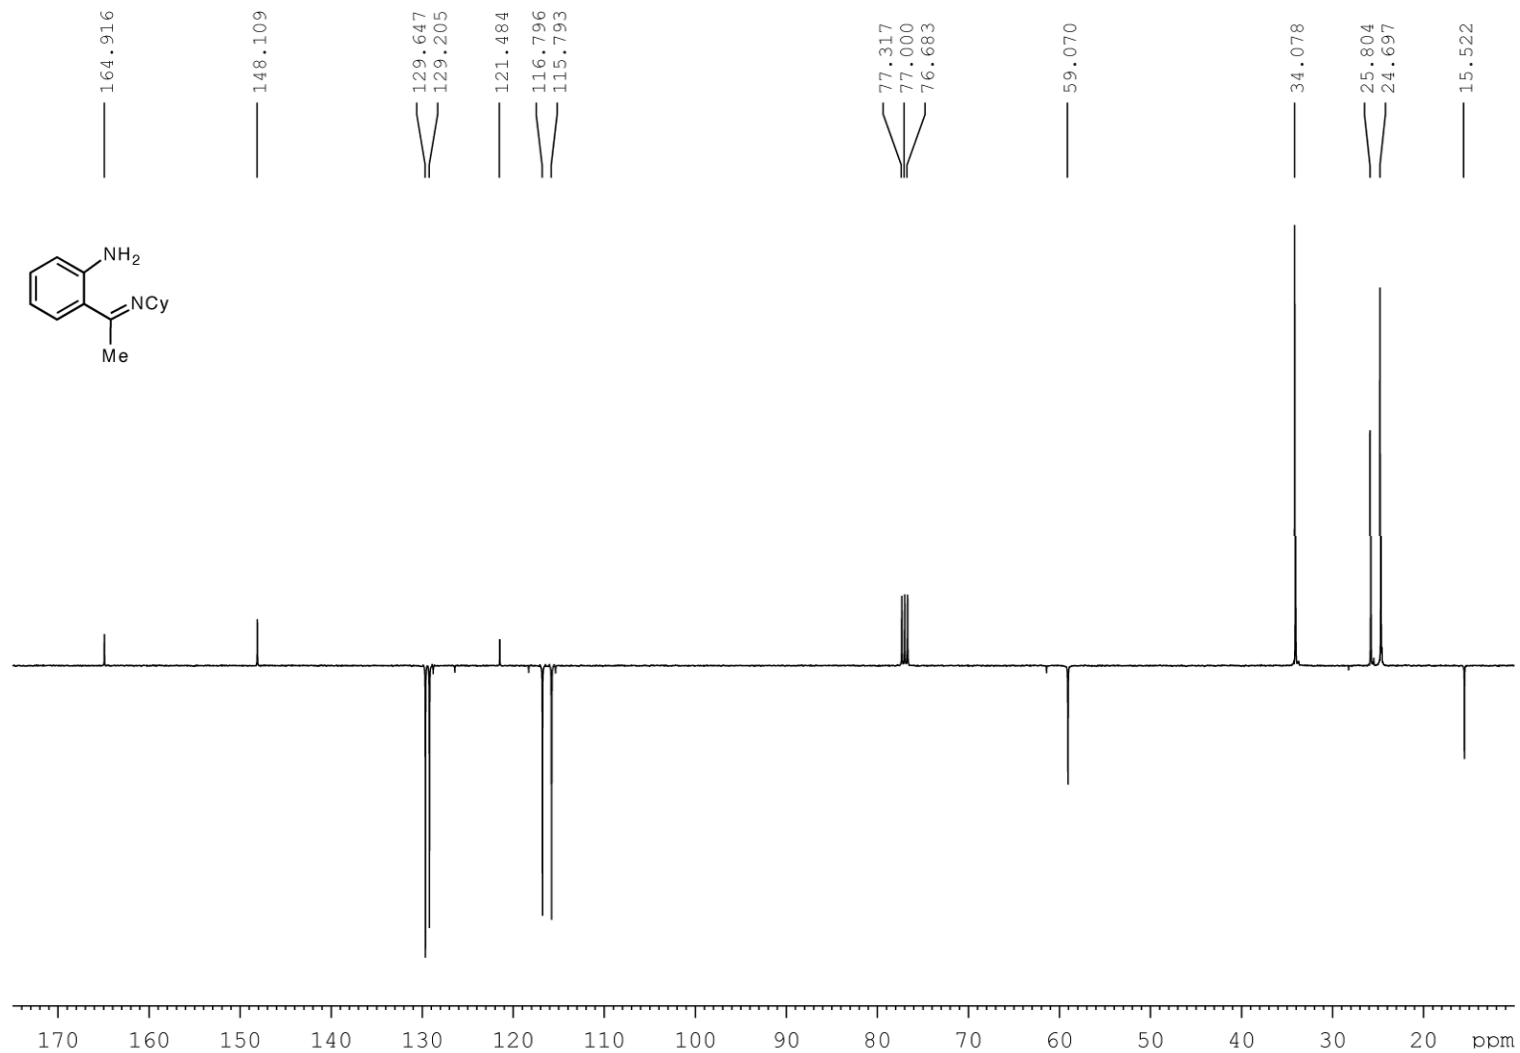

$^1\text{H}$  NMR spectra of **R-2e** (400 MHz,  $\text{CDCl}_3$ , 25 °C, TMS).

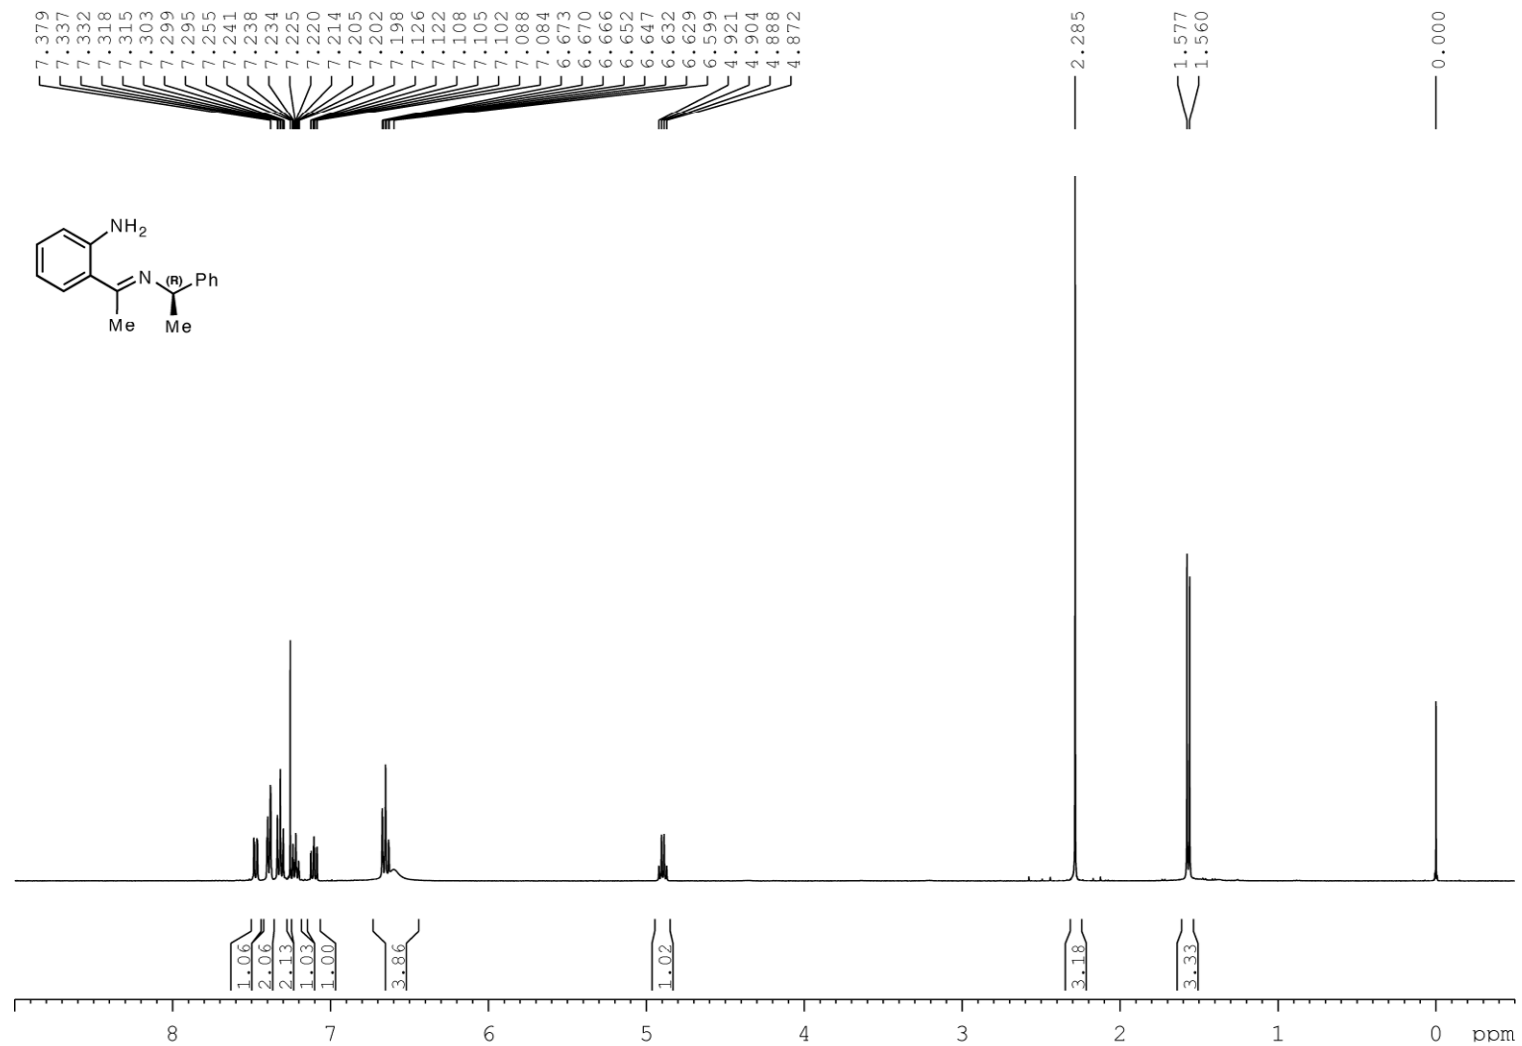

$^{13}\text{C}\{^1\text{H}\}$  NMR APT spectra of **R-2e** (100.8 MHz,  $\text{CDCl}_3$ , 25 °C, TMS).

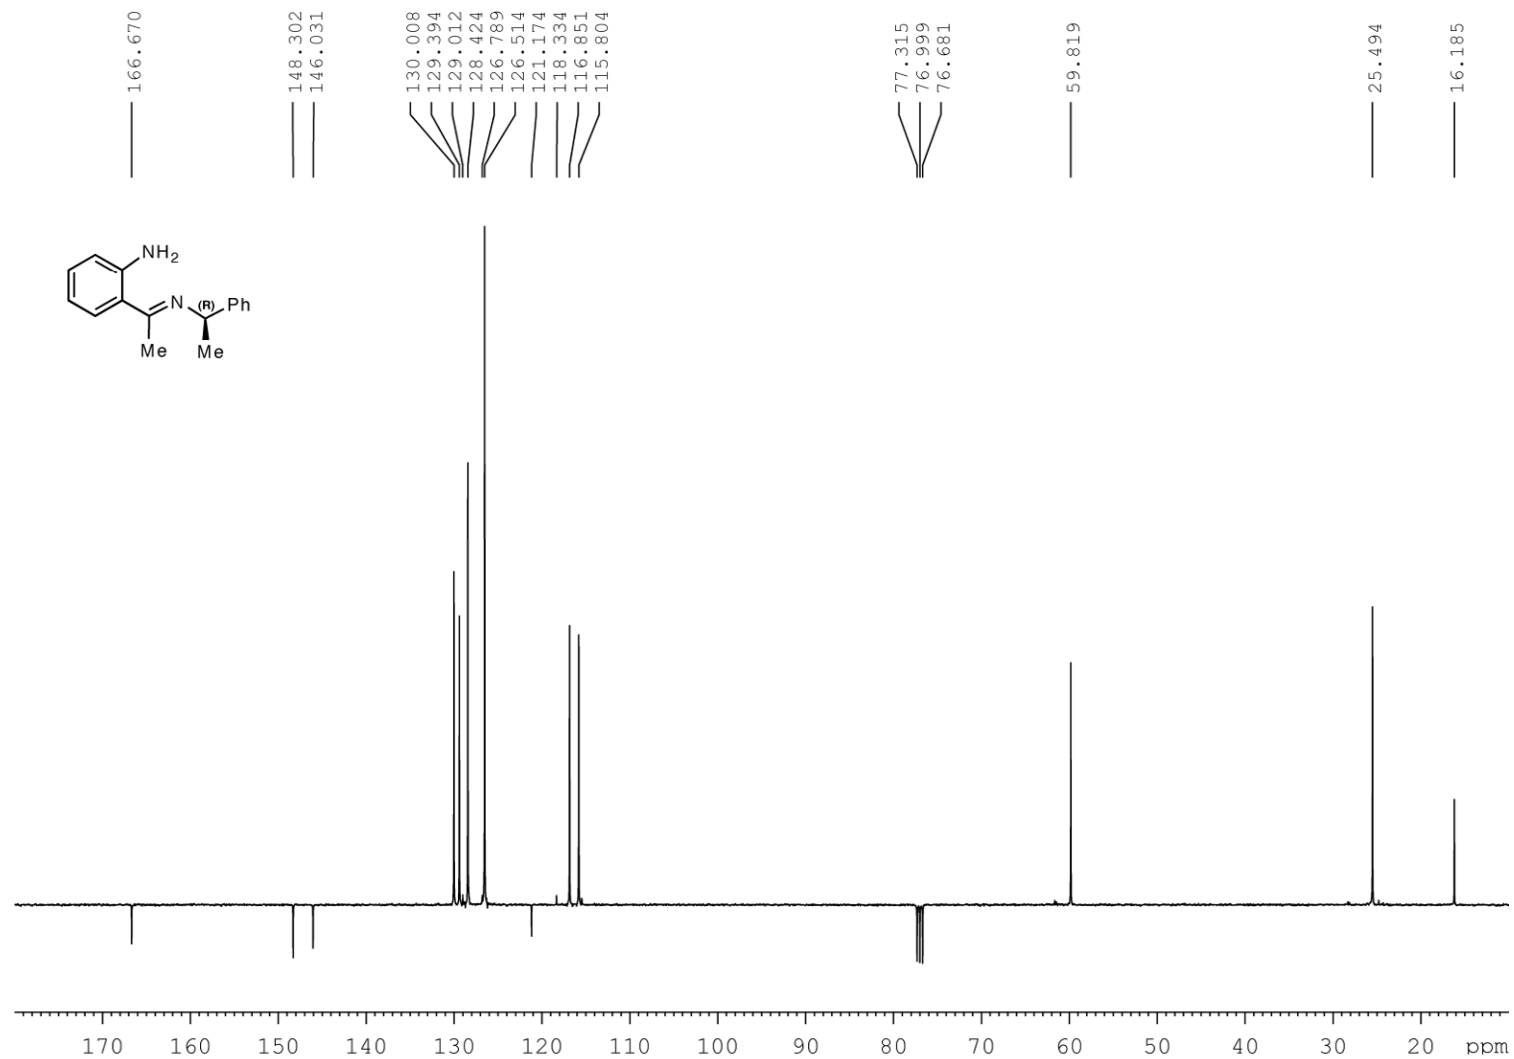



$^1\text{H}$  NMR spectra of **3a1** (400 MHz,  $\text{CDCl}_3$ , 25 °C, TMS)

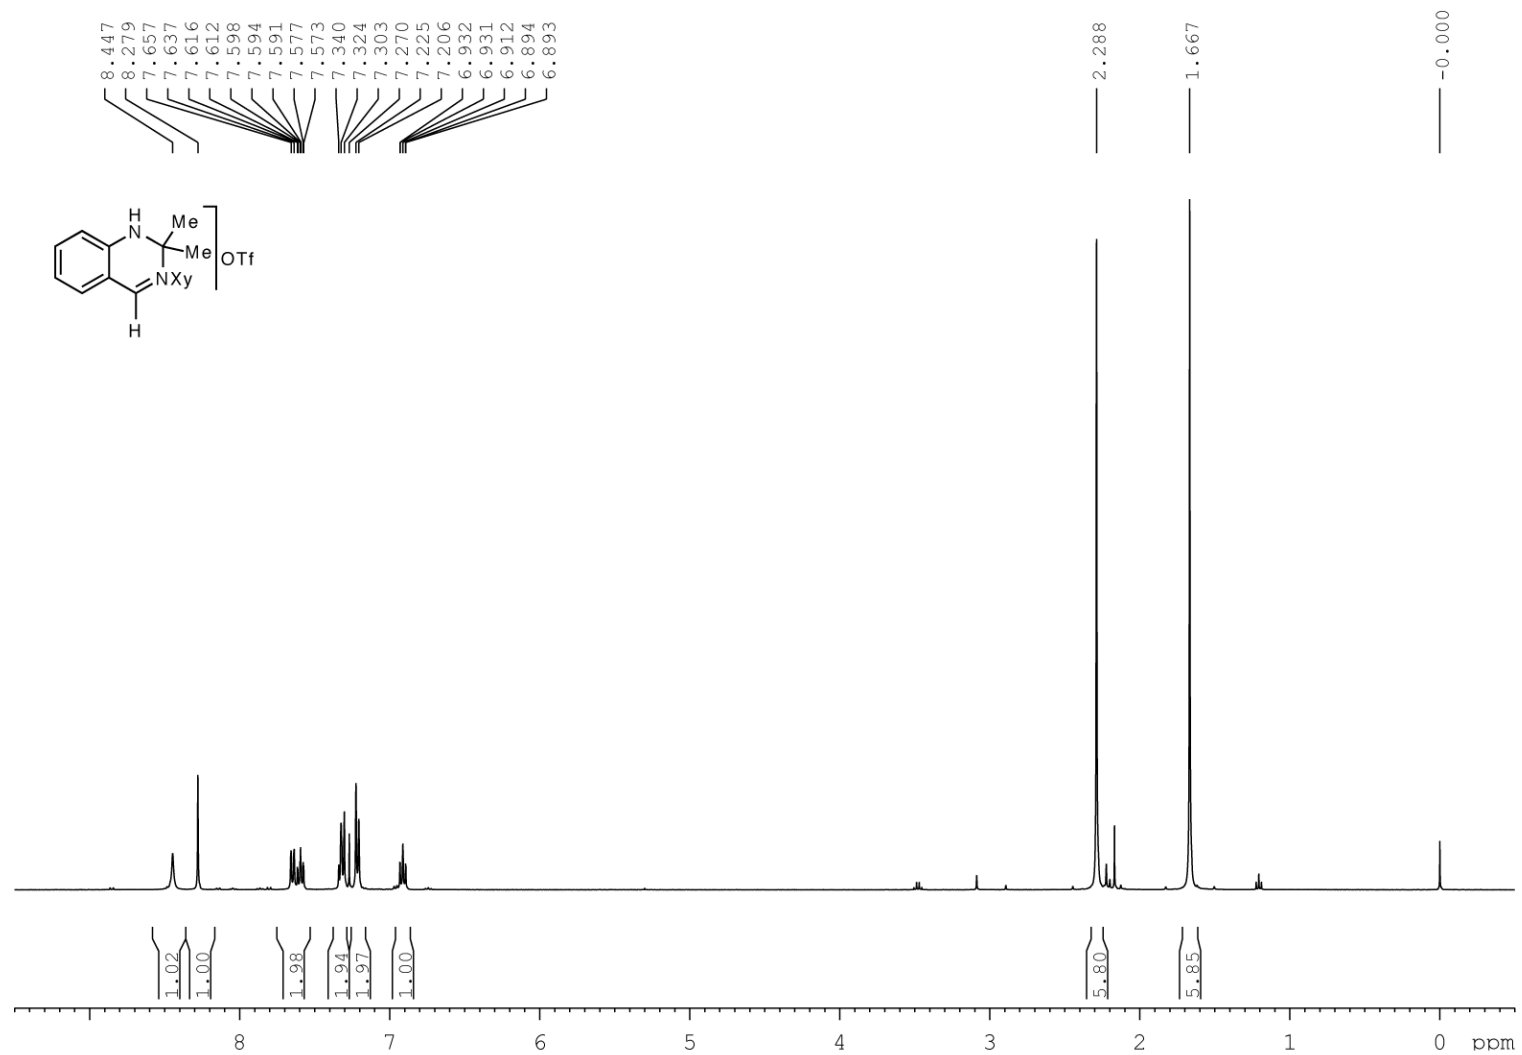

$^{13}\text{C}\{^1\text{H}\}$  NMR APT spectra of **3a1** (100.8 MHz,  $\text{CDCl}_3$ , 25 °C, TMS).

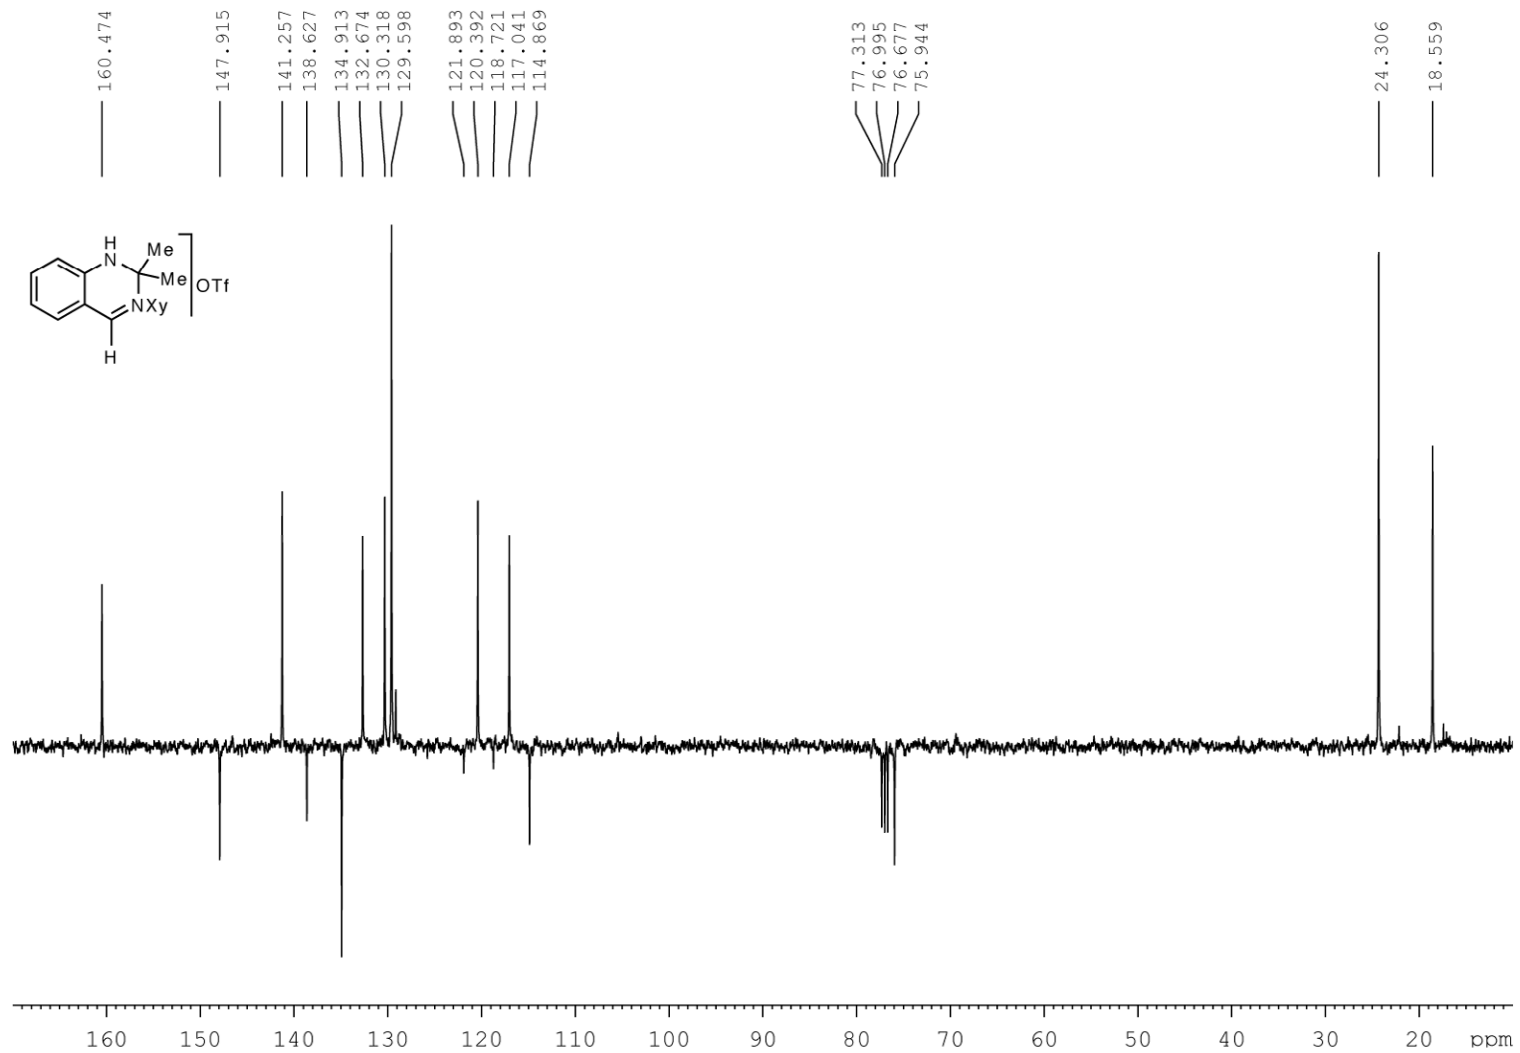

$^1\text{H}$  NMR spectra of **3a2**·0.6CHCl<sub>3</sub> (400 MHz, CDCl<sub>3</sub>, -35 °C, TMS).

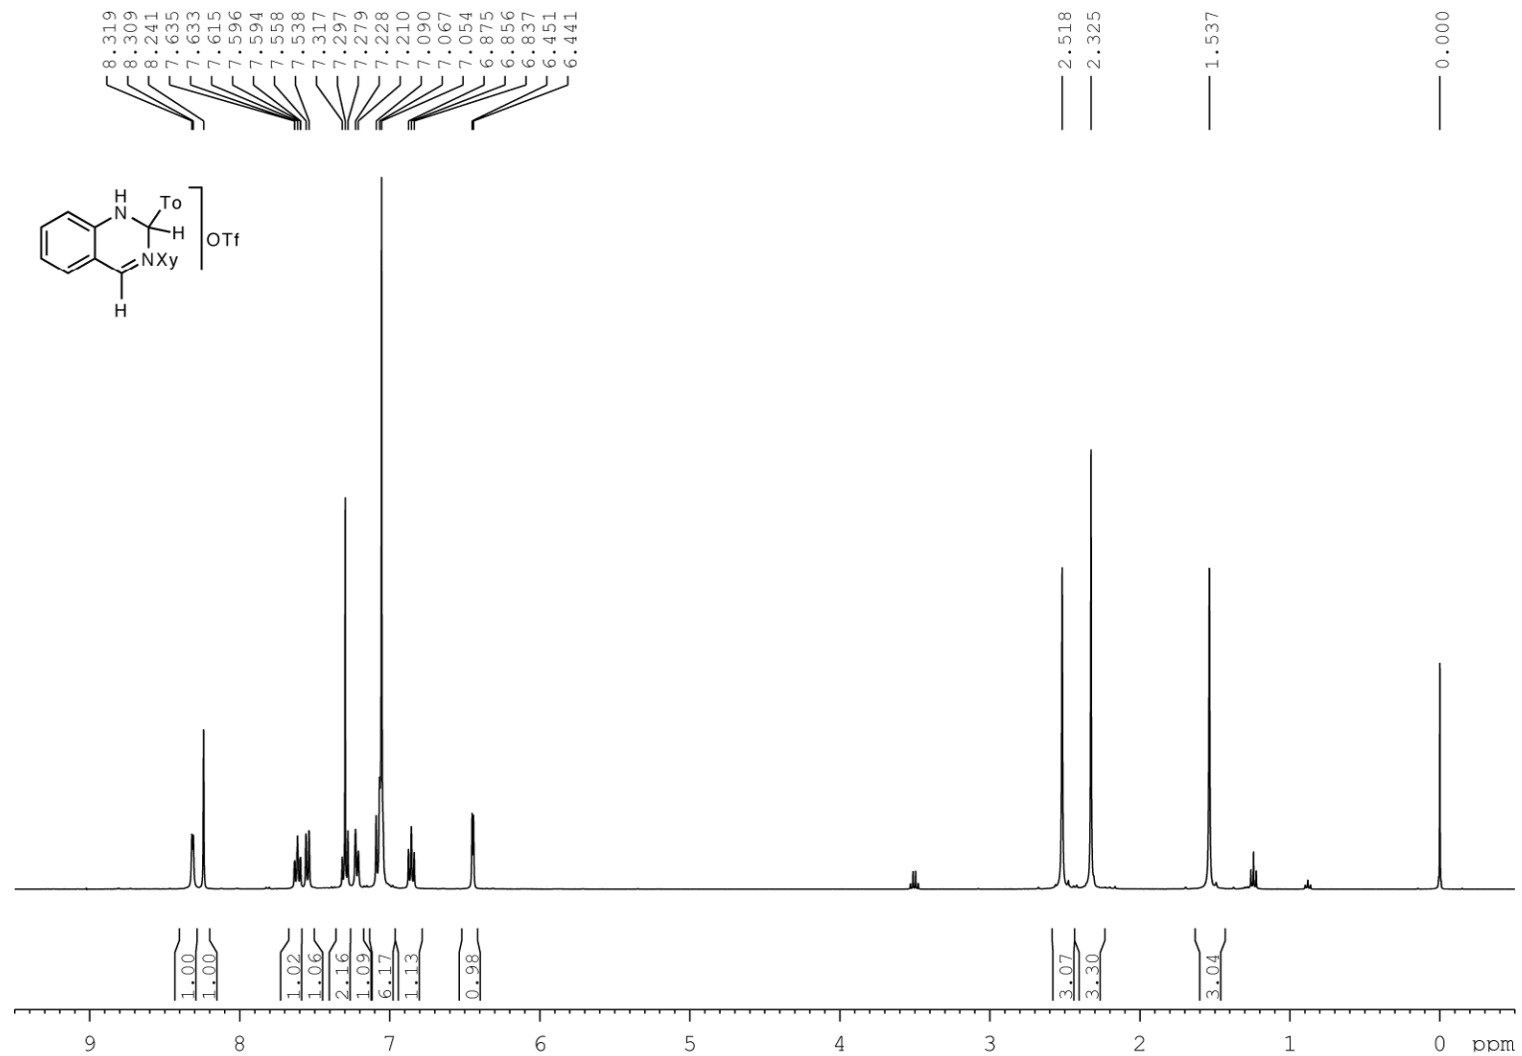

$^1\text{H}$  NMR spectra of **3a2**·0.6CHCl<sub>3</sub> (400 MHz, CDCl<sub>3</sub>, 25 °C, TMS).

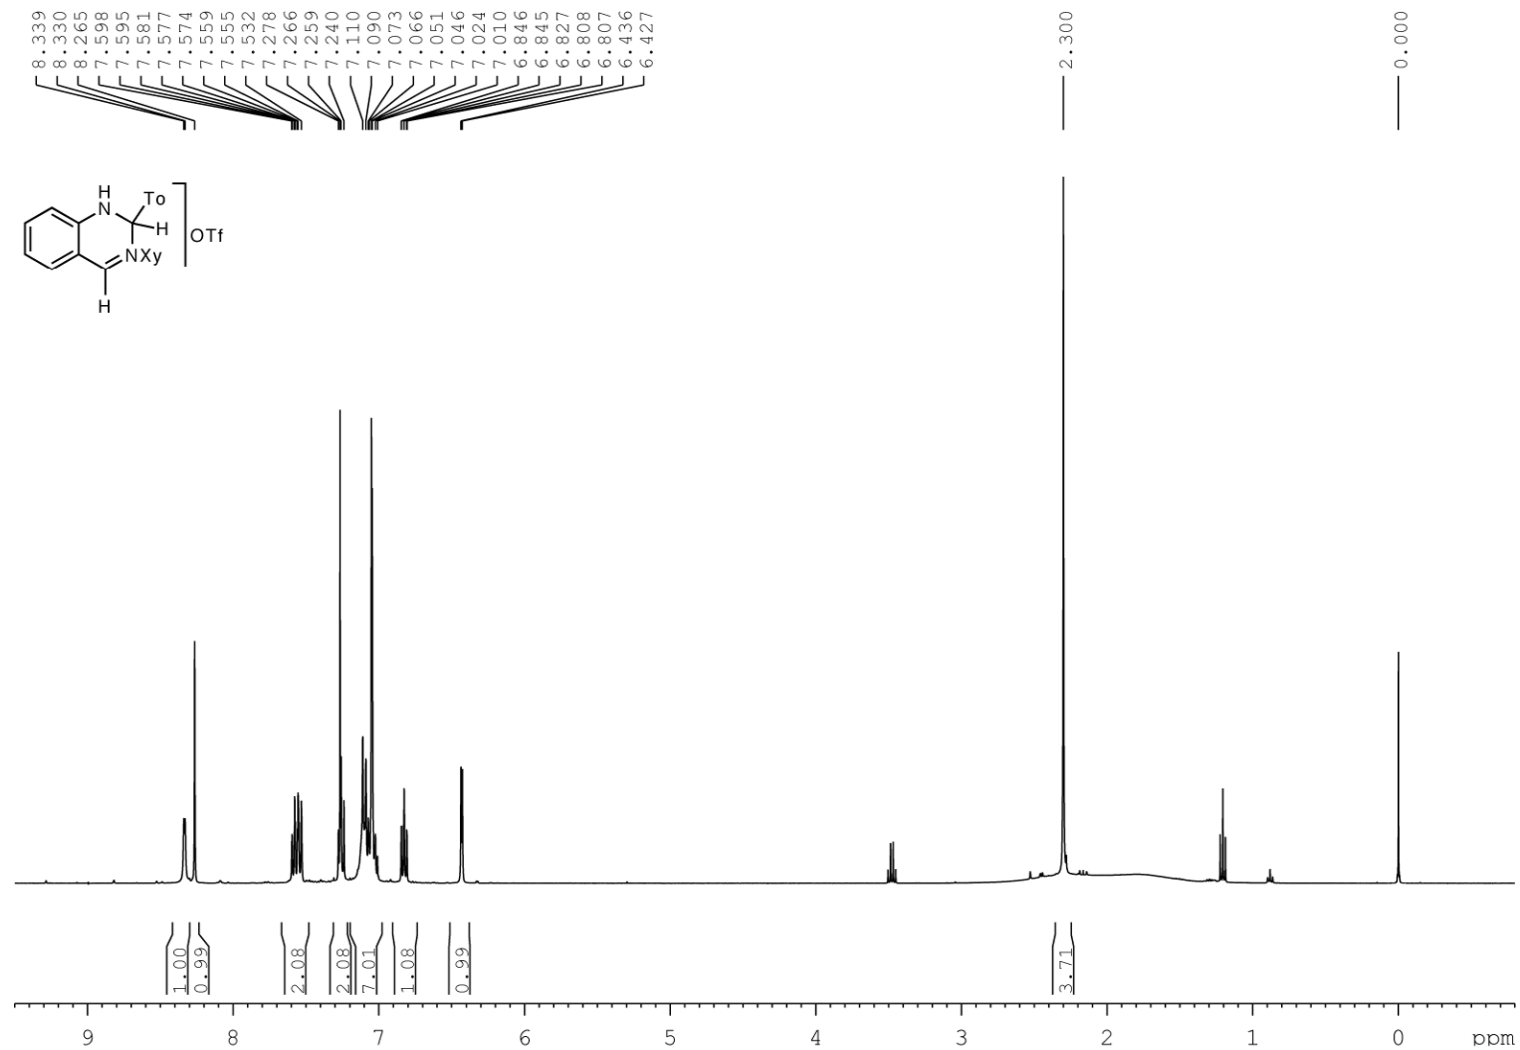

$^1\text{H}$  NMR spectra of **3a2**·0.6CHCl<sub>3</sub> (400 MHz, CDCl<sub>3</sub>, 55 °C, TMS).

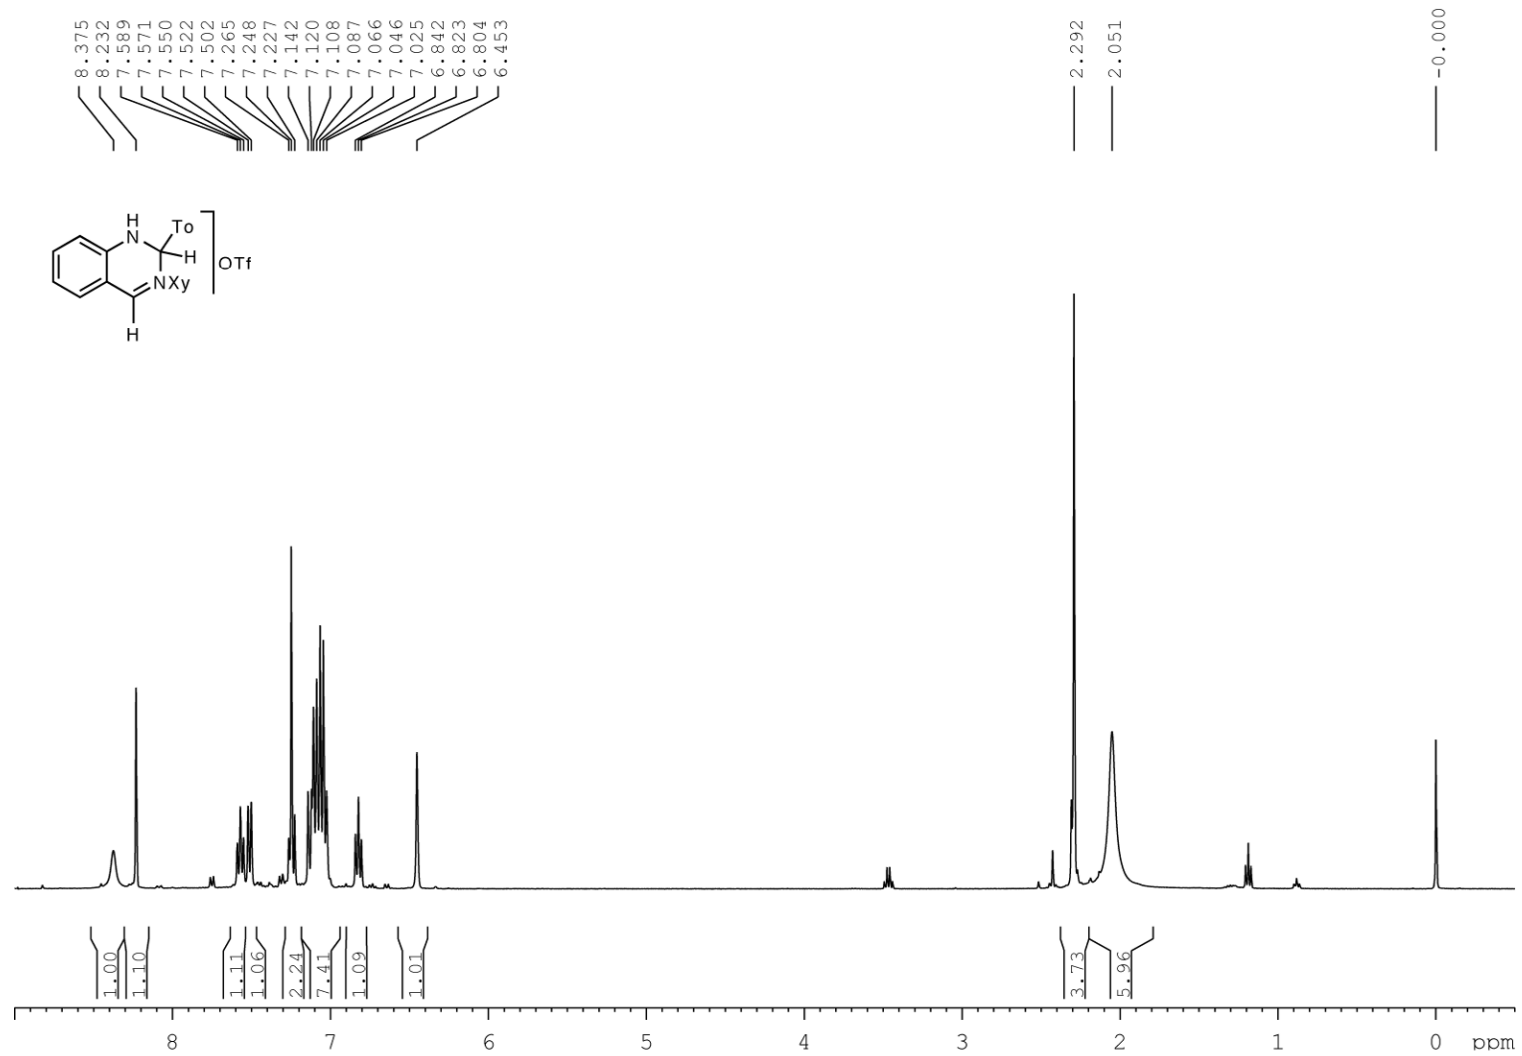

$^{13}\text{C}\{^1\text{H}\}$  NMR APT spectra of **3a2**·0.6CHCl<sub>3</sub> (100.8 MHz, CDCl<sub>3</sub>, -35 °C, TMS).

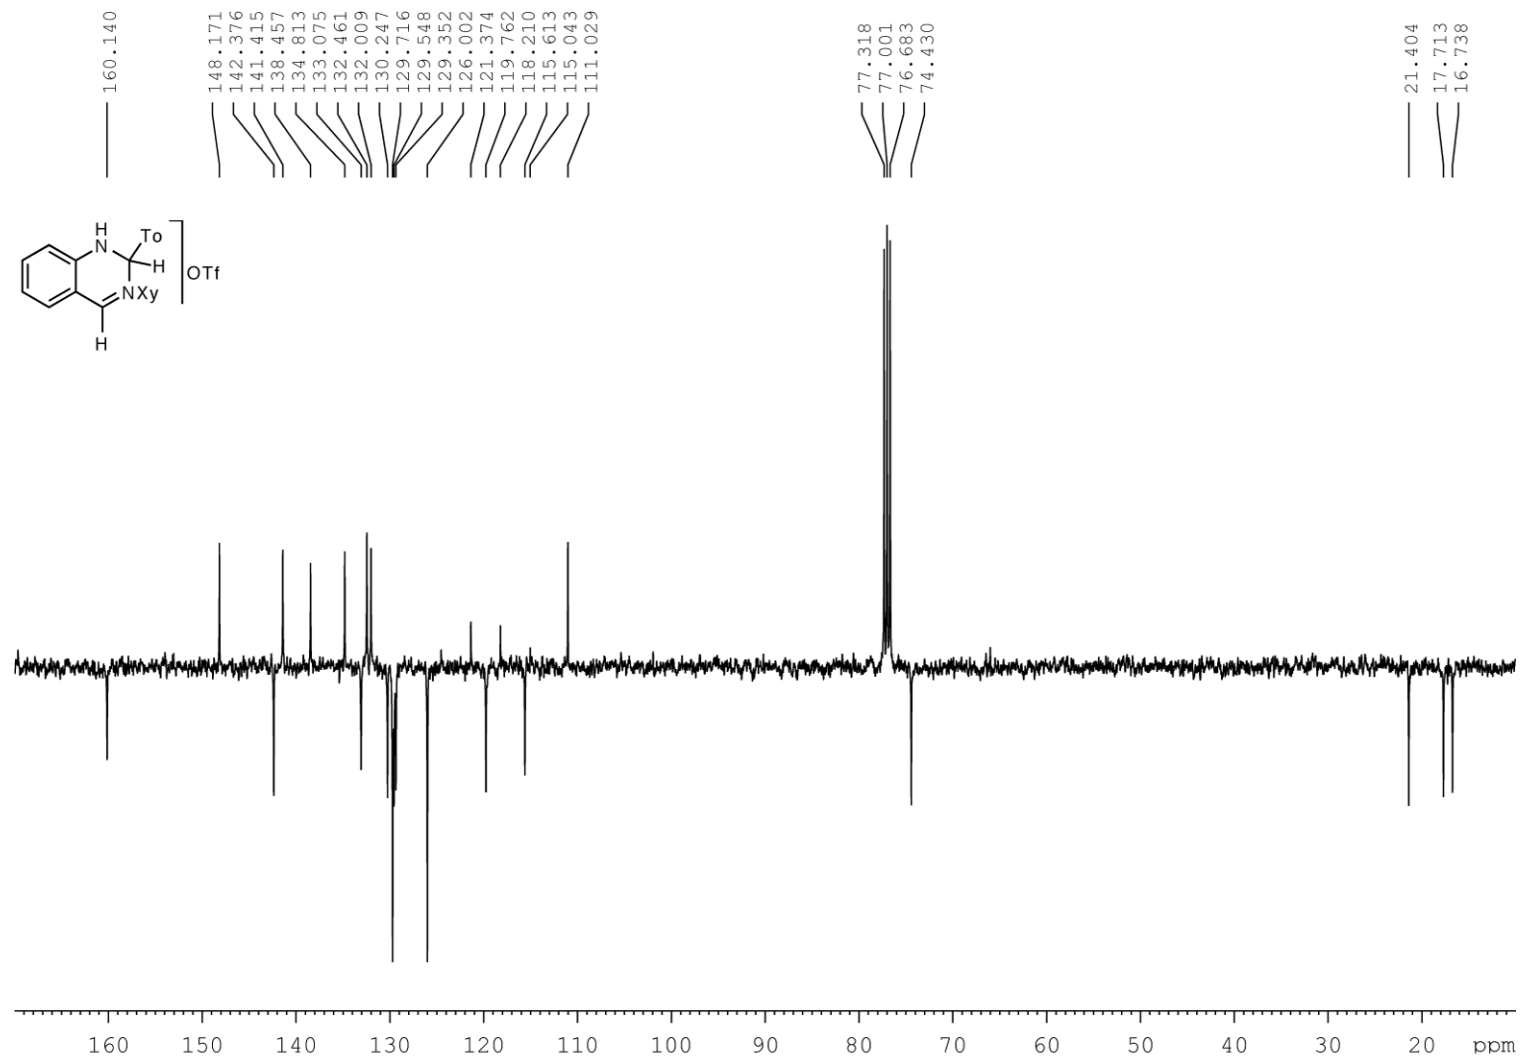

$^{13}\text{C}\{^1\text{H}\}$  NMR APT spectra of **3a2**·0.6 $\text{CHCl}_3$  (100.8 MHz,  $\text{CDCl}_3$ , 25 °C, TMS).

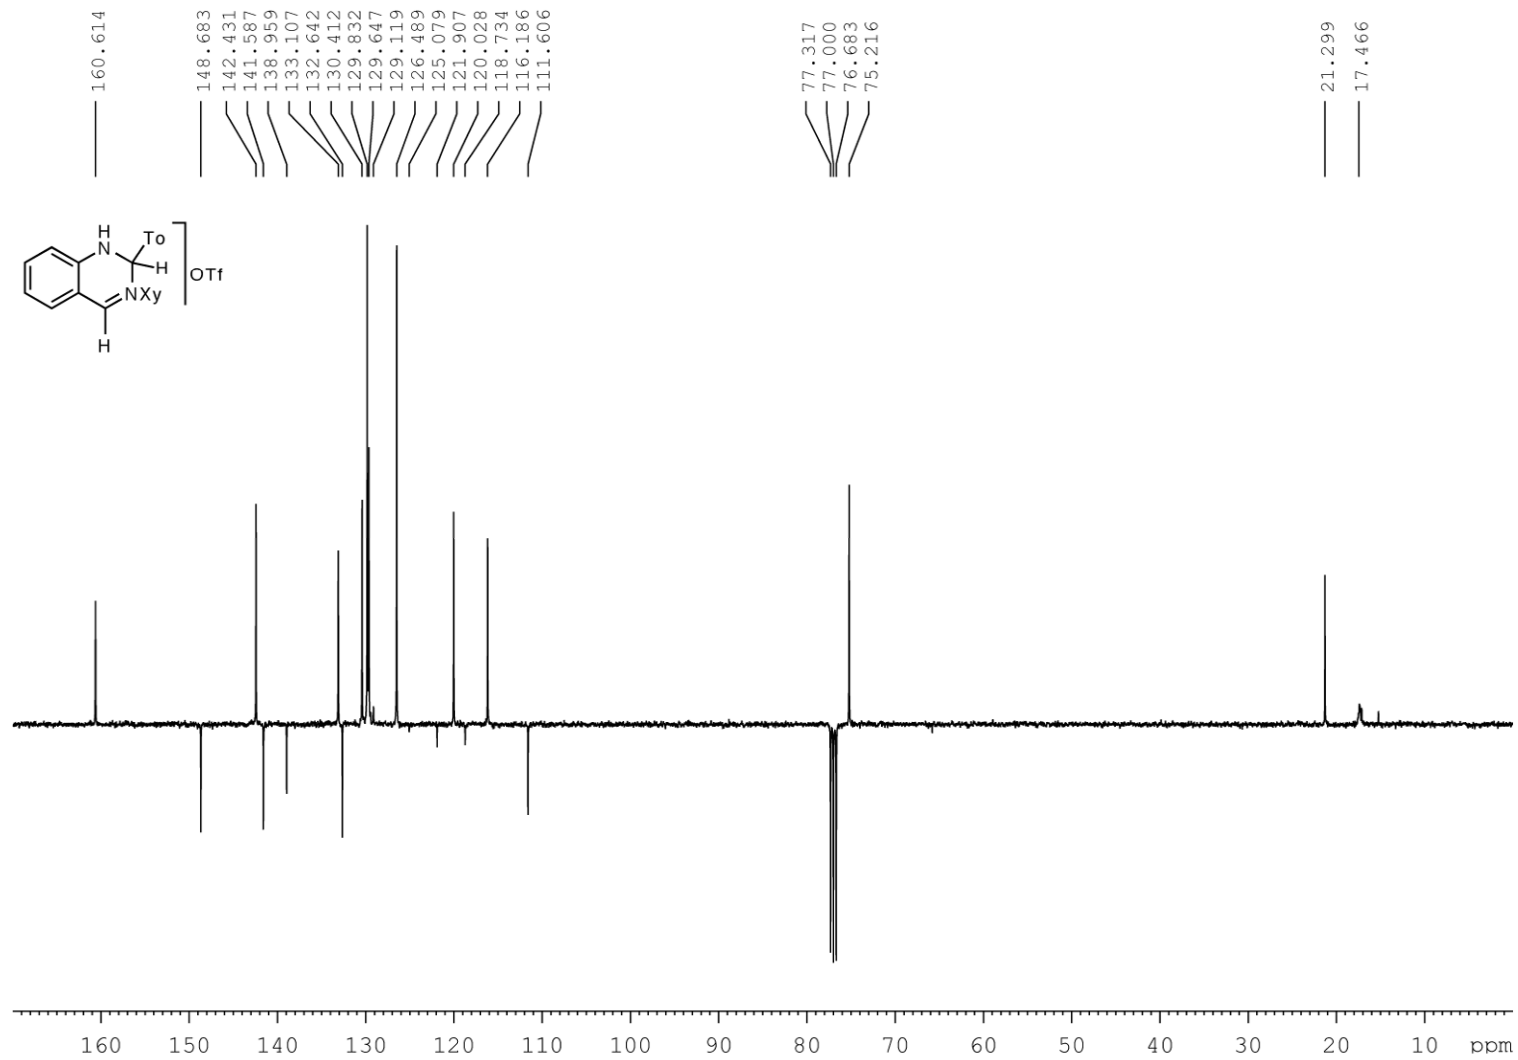

$^{13}\text{C}\{^1\text{H}\}$  NMR APT spectra of **3a2**·0.6 $\text{CHCl}_3$  (100.8 MHz,  $\text{CDCl}_3$ , 55 °C, TMS).

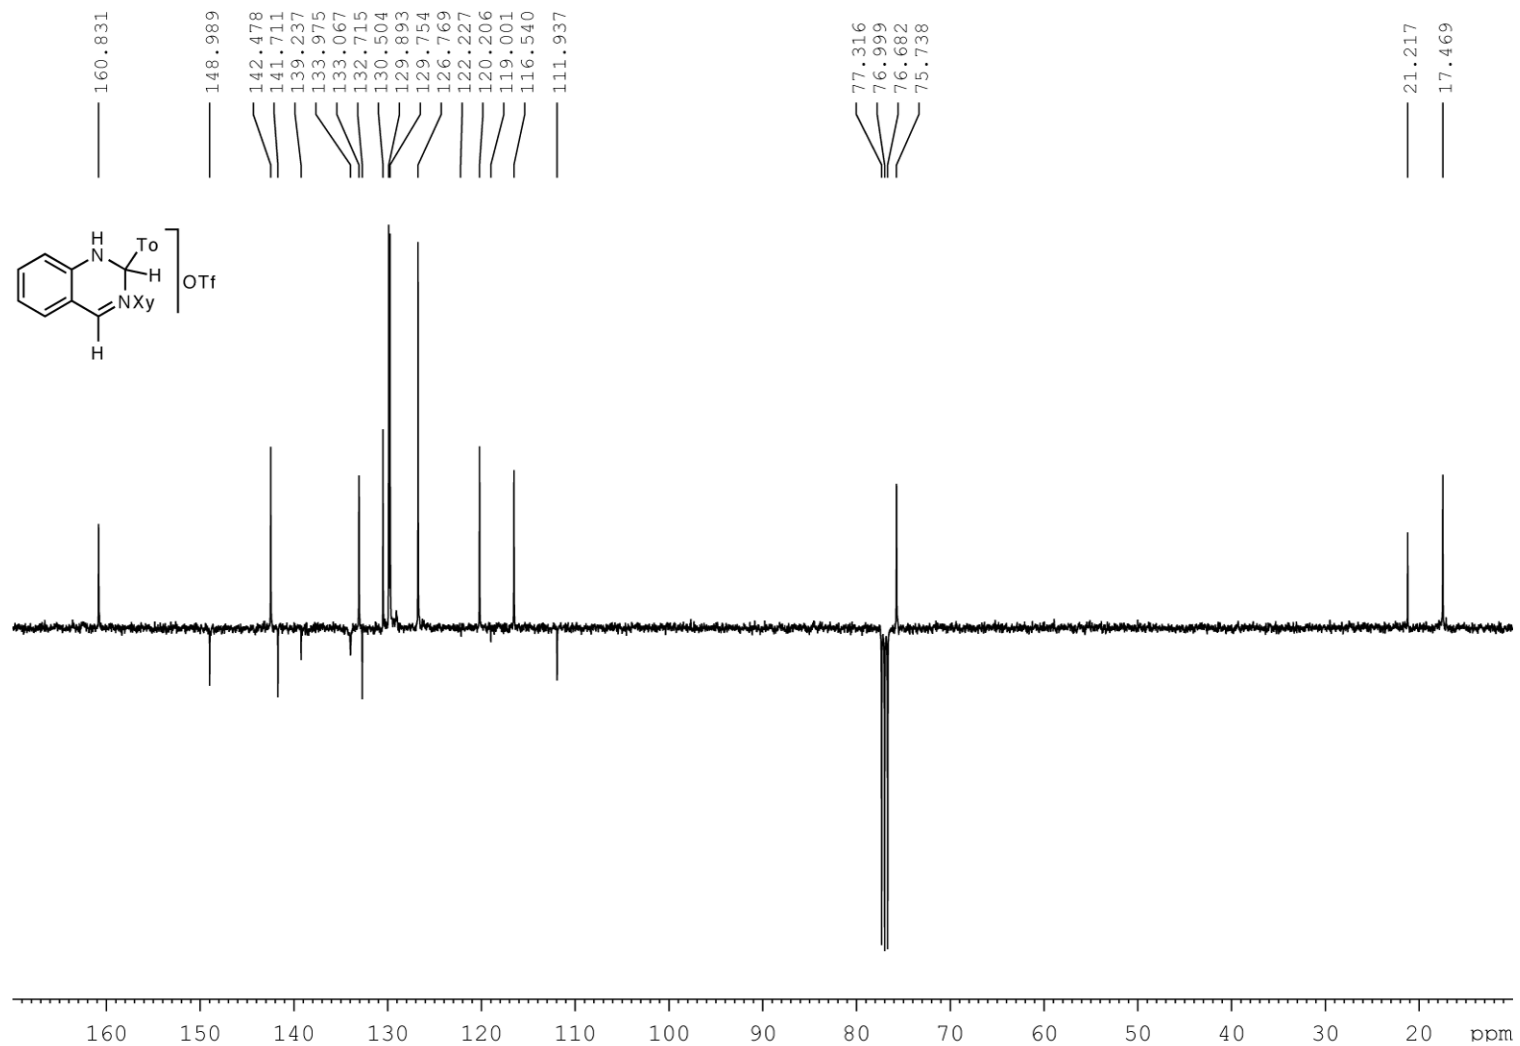



$^1\text{H}$  NMR spectra of **3a3**·H<sub>2</sub>O (300 MHz, CDCl<sub>3</sub>, 55 °C, TMS).

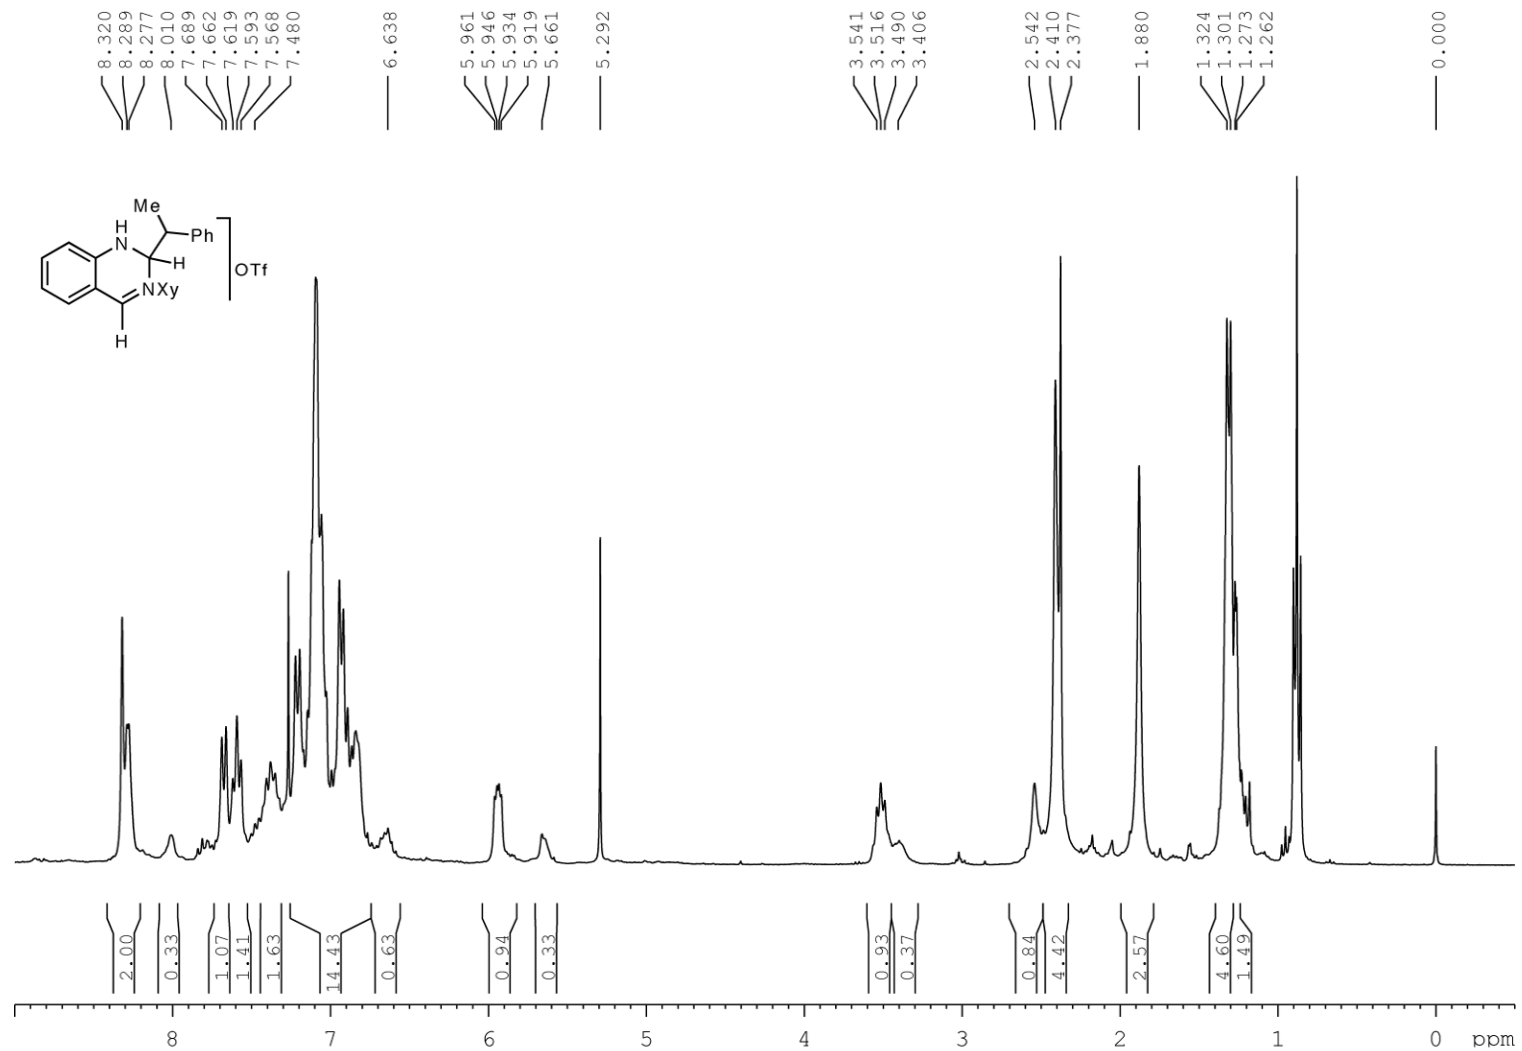

$^{13}\text{C}\{^1\text{H}\}$  NMR APT spectra of **3a3** (75.5 MHz,  $\text{CDCl}_3$ , 25 °C, TMS).

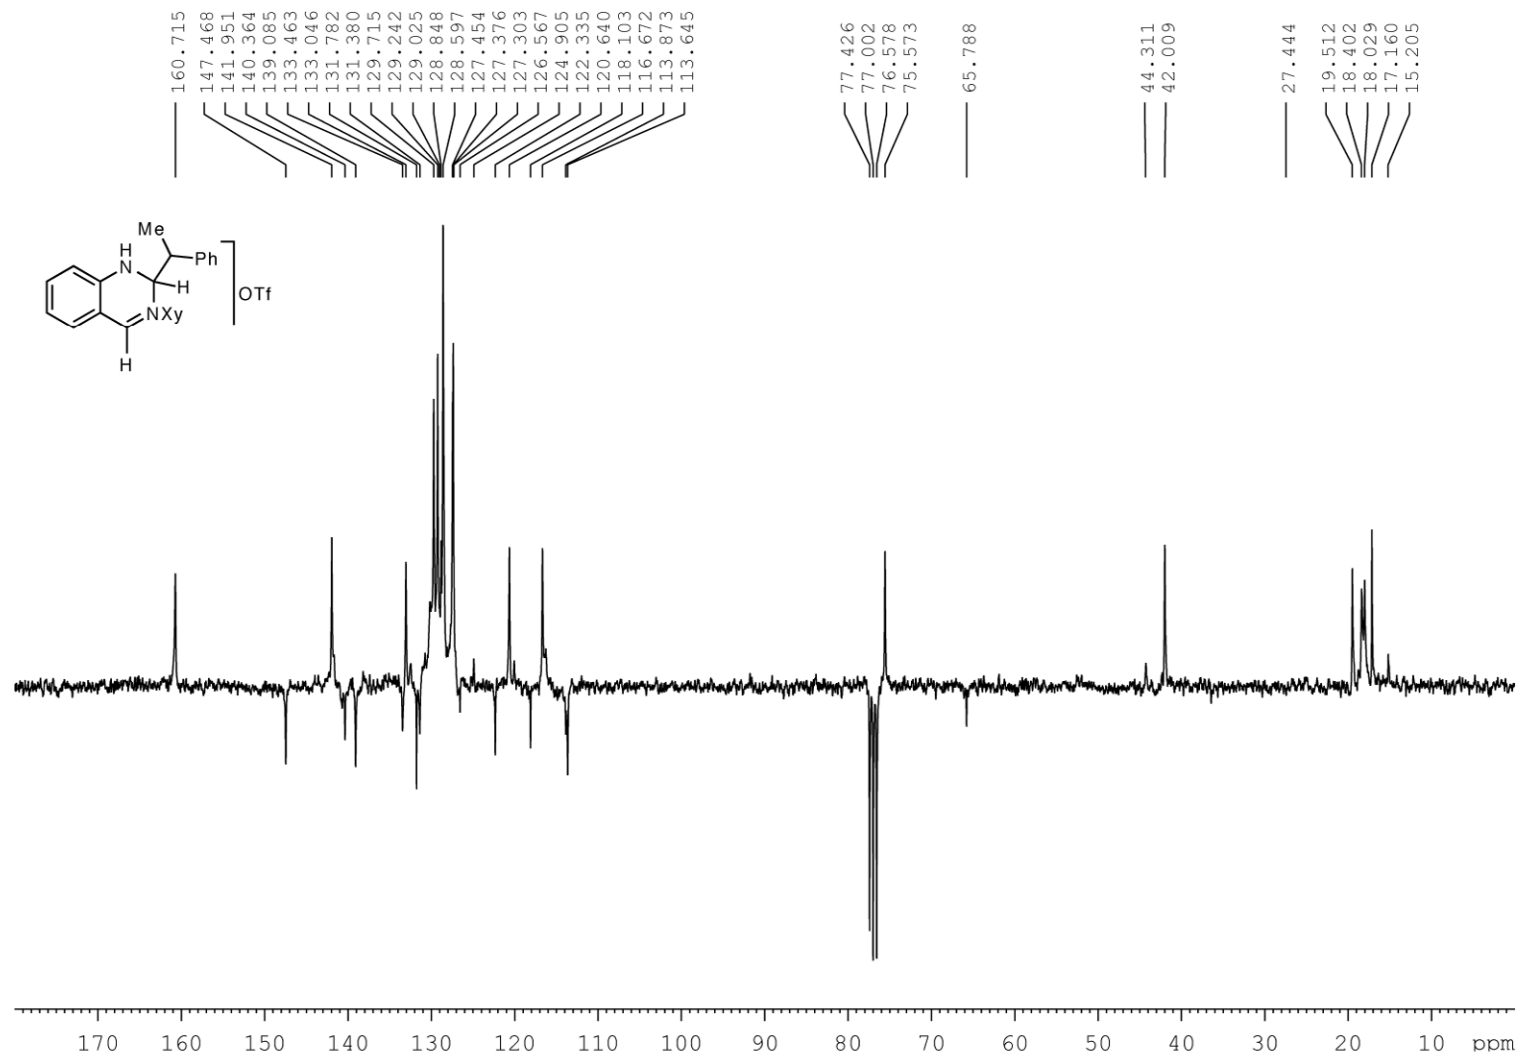

$^1\text{H}$  NMR spectra of **3b2**·0.5H<sub>2</sub>O (300 MHz, CDCl<sub>3</sub>, 25 °C, TMS).

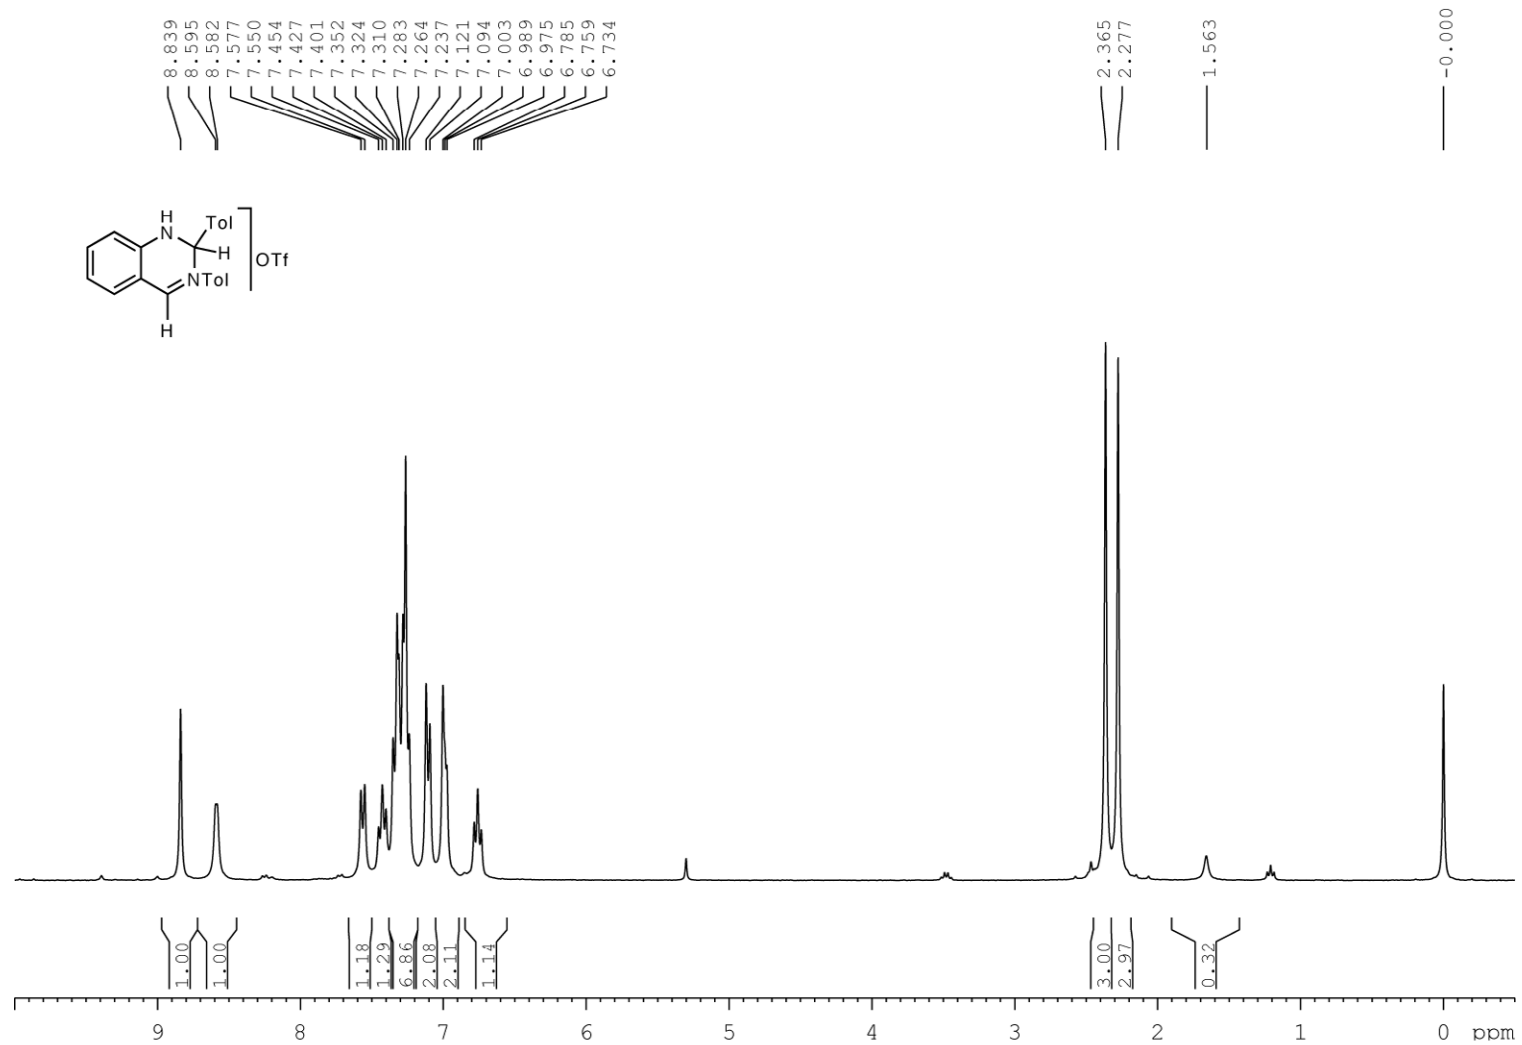

$^{13}\text{C}\{^1\text{H}\}$  NMR APT spectra of **3b2** (75.5 MHz,  $\text{CDCl}_3$ , 25 °C, TMS).

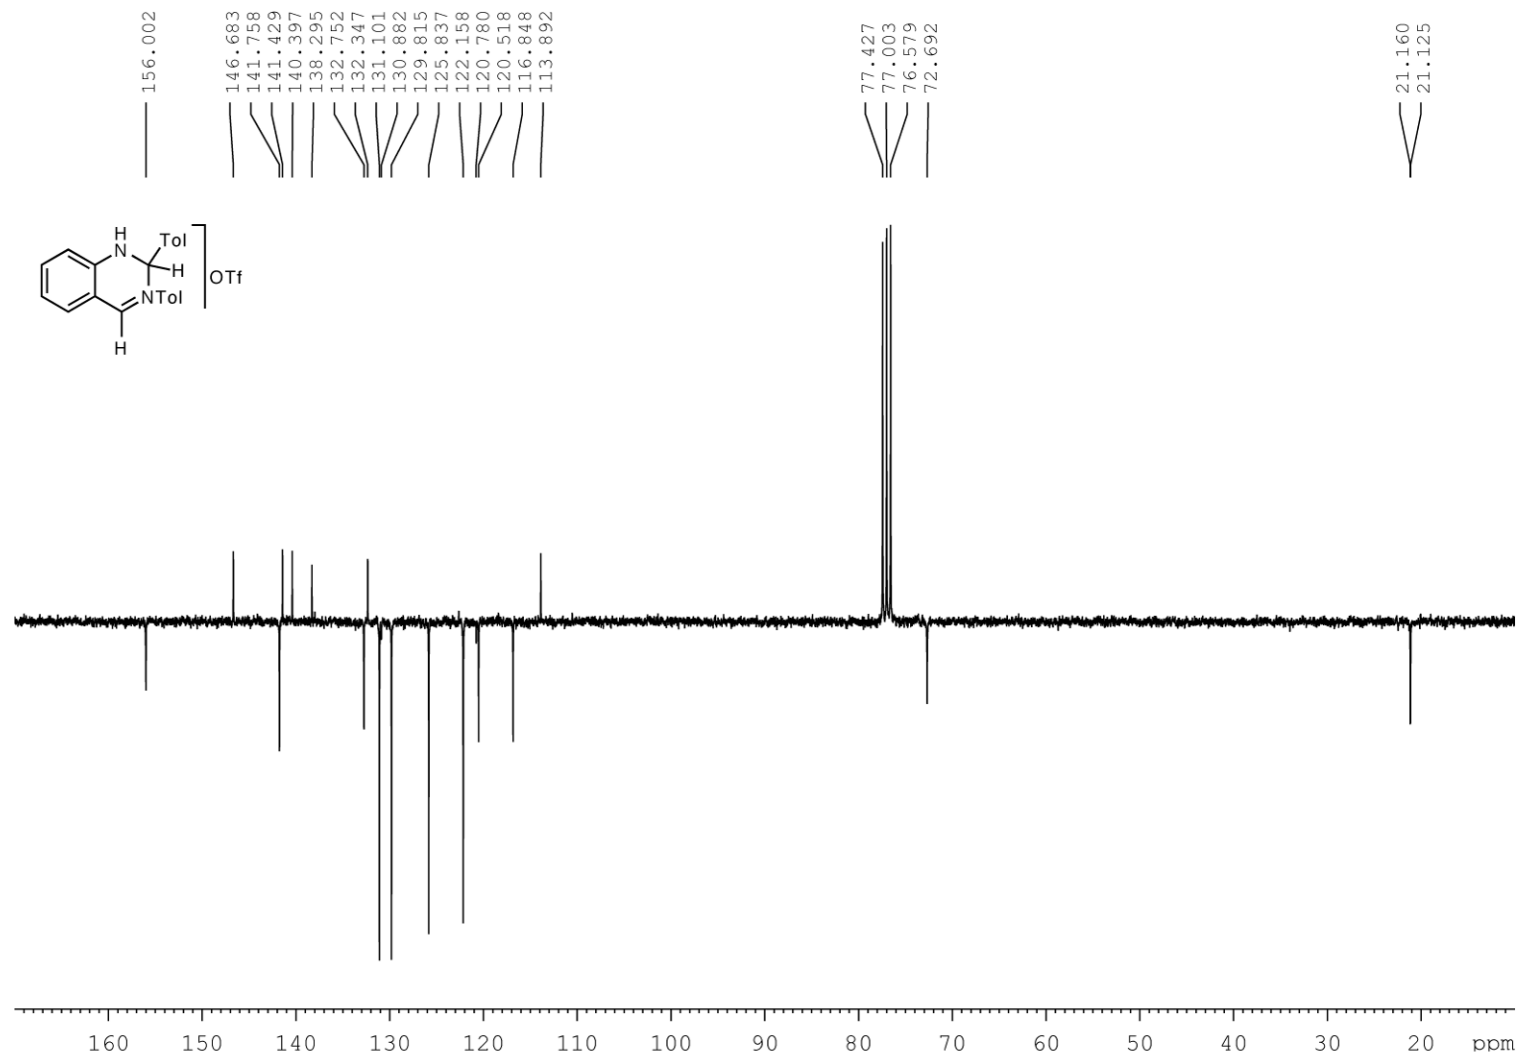

$^1\text{H}$  NMR spectra of **3b3** (400 MHz,  $\text{CDCl}_3$ , 25 °C, TMS).

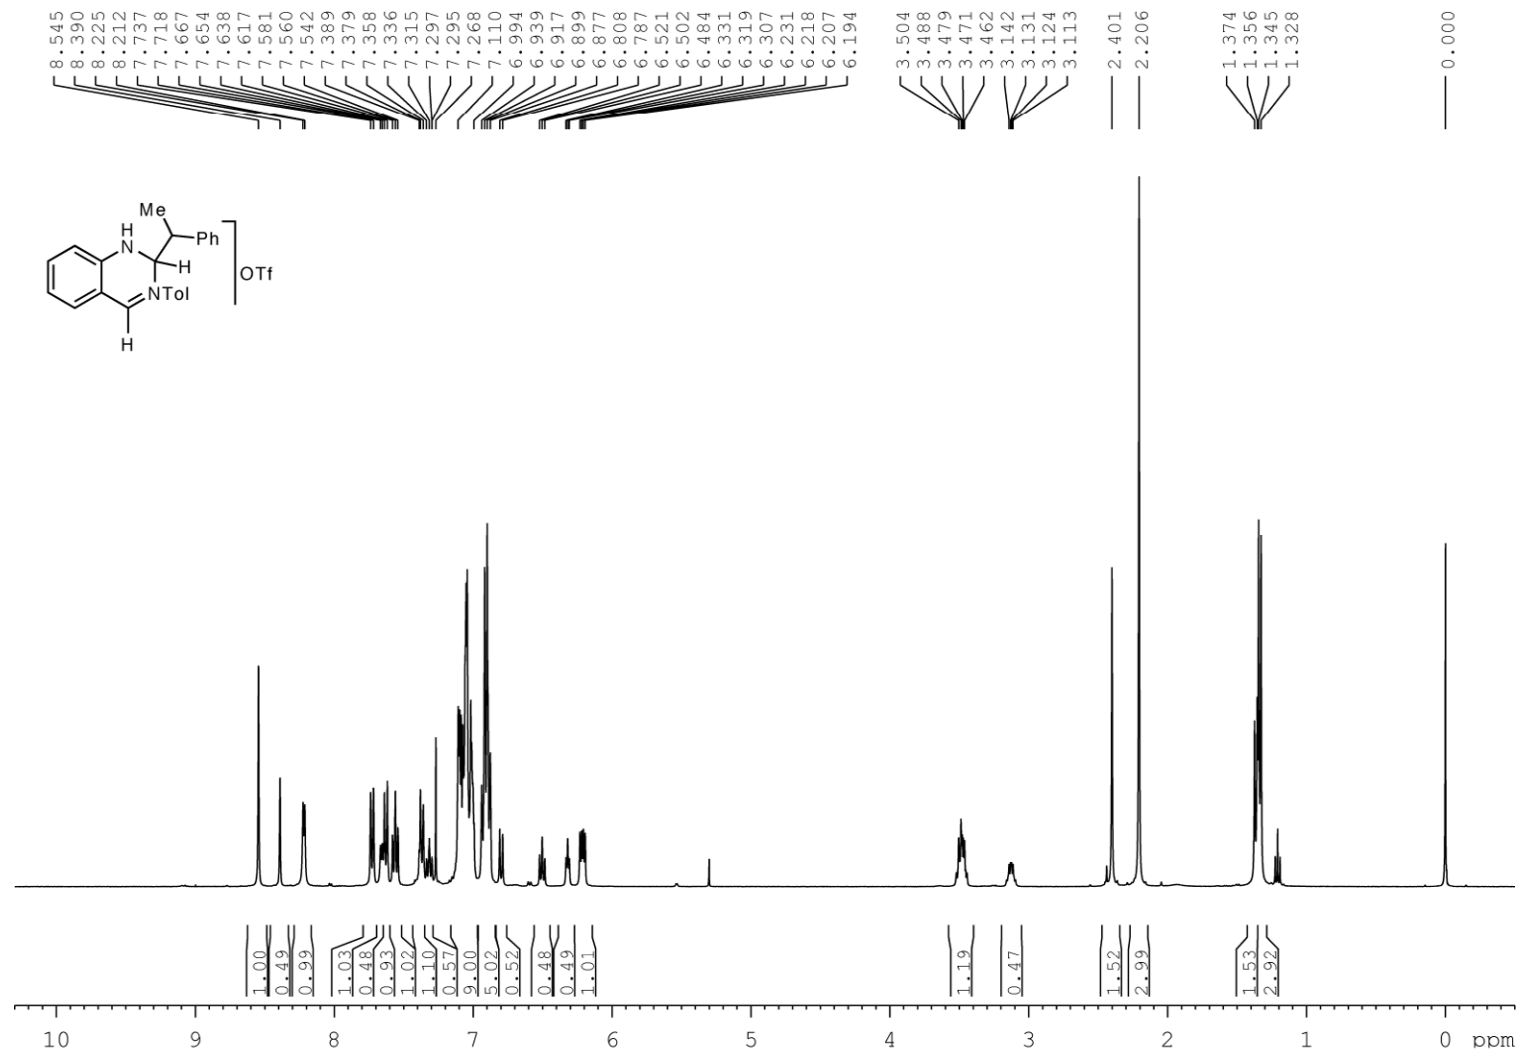

$^{13}\text{C}\{^1\text{H}\}$  NMR APT spectra of **3b3** (100.8 MHz,  $\text{CDCl}_3$ , 25 °C, TMS).

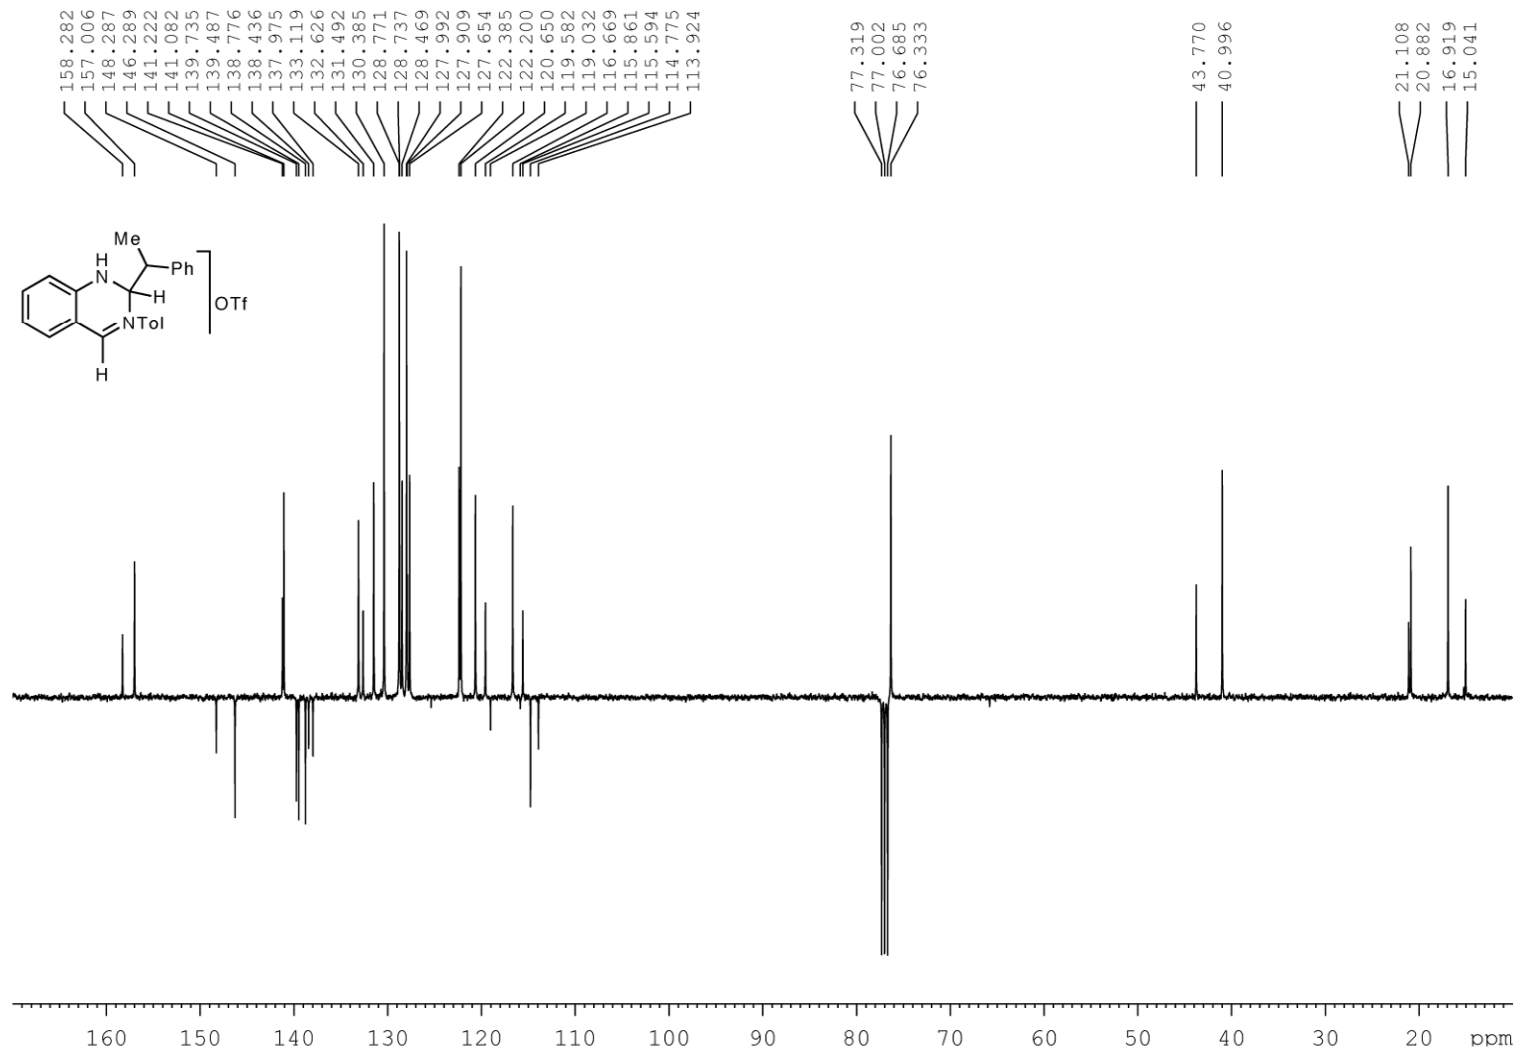

$^1\text{H}$  NMR spectra of **3c1** (400 MHz,  $\text{CDCl}_3$ , 25  $^\circ\text{C}$ , TMS).

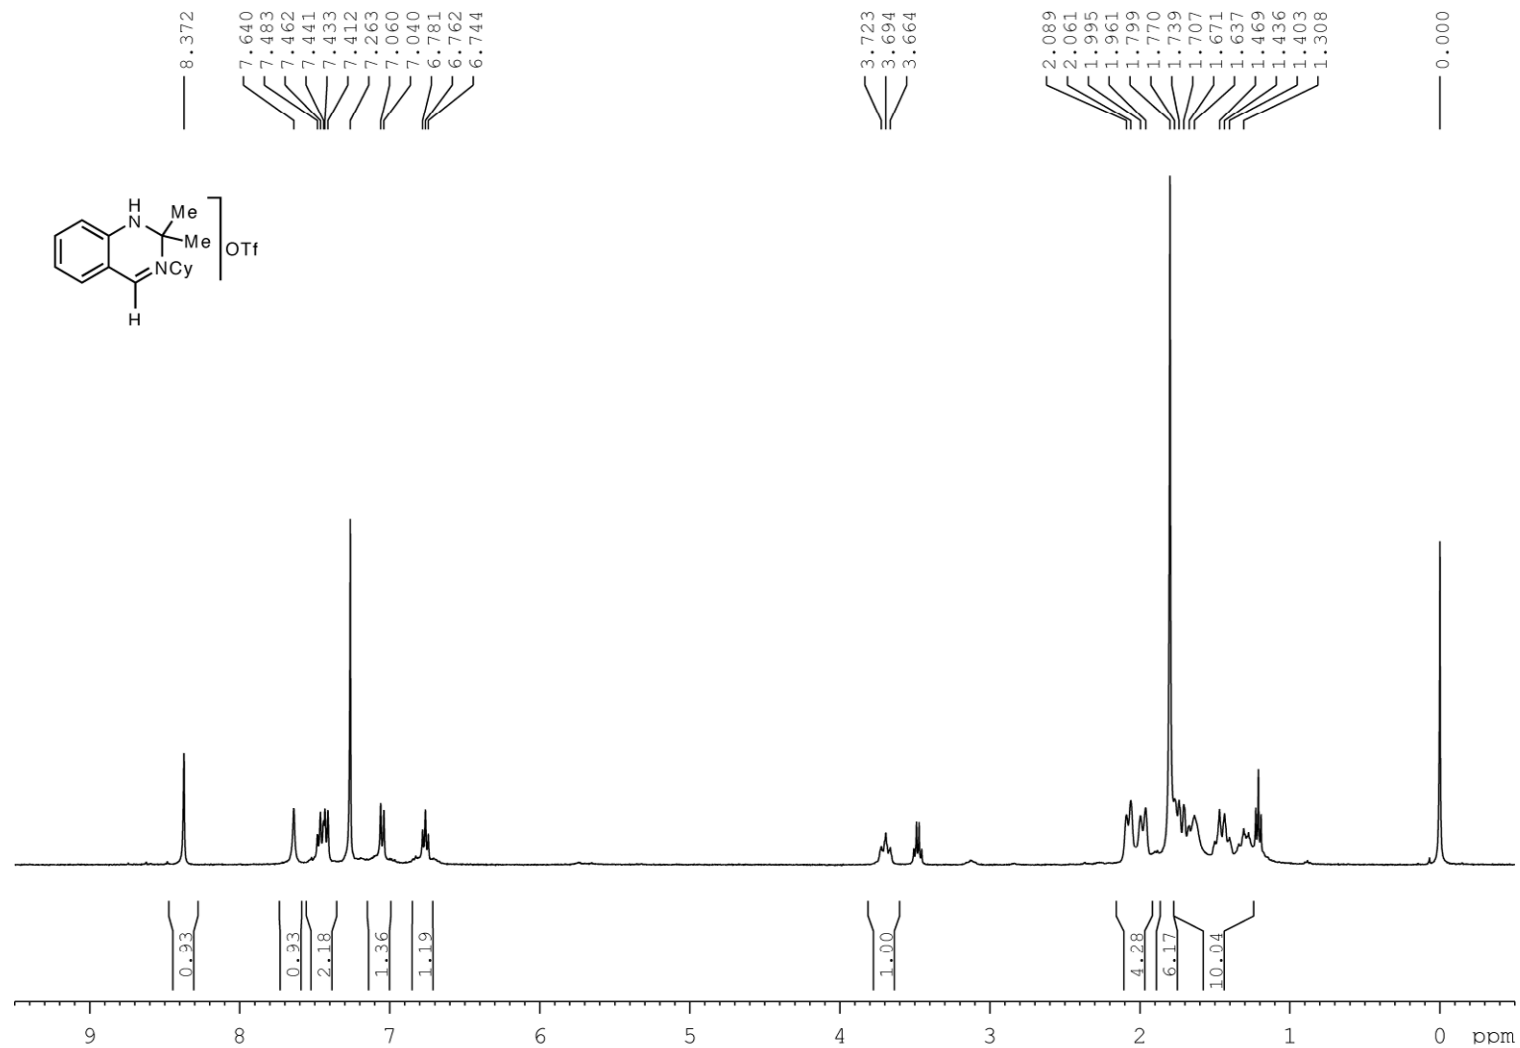

$^{13}\text{C}\{^1\text{H}\}$  NMR APT spectra of **3c1** (see Discussion; 100.8 MHz,  $\text{CDCl}_3$ , 25 °C, TMS).

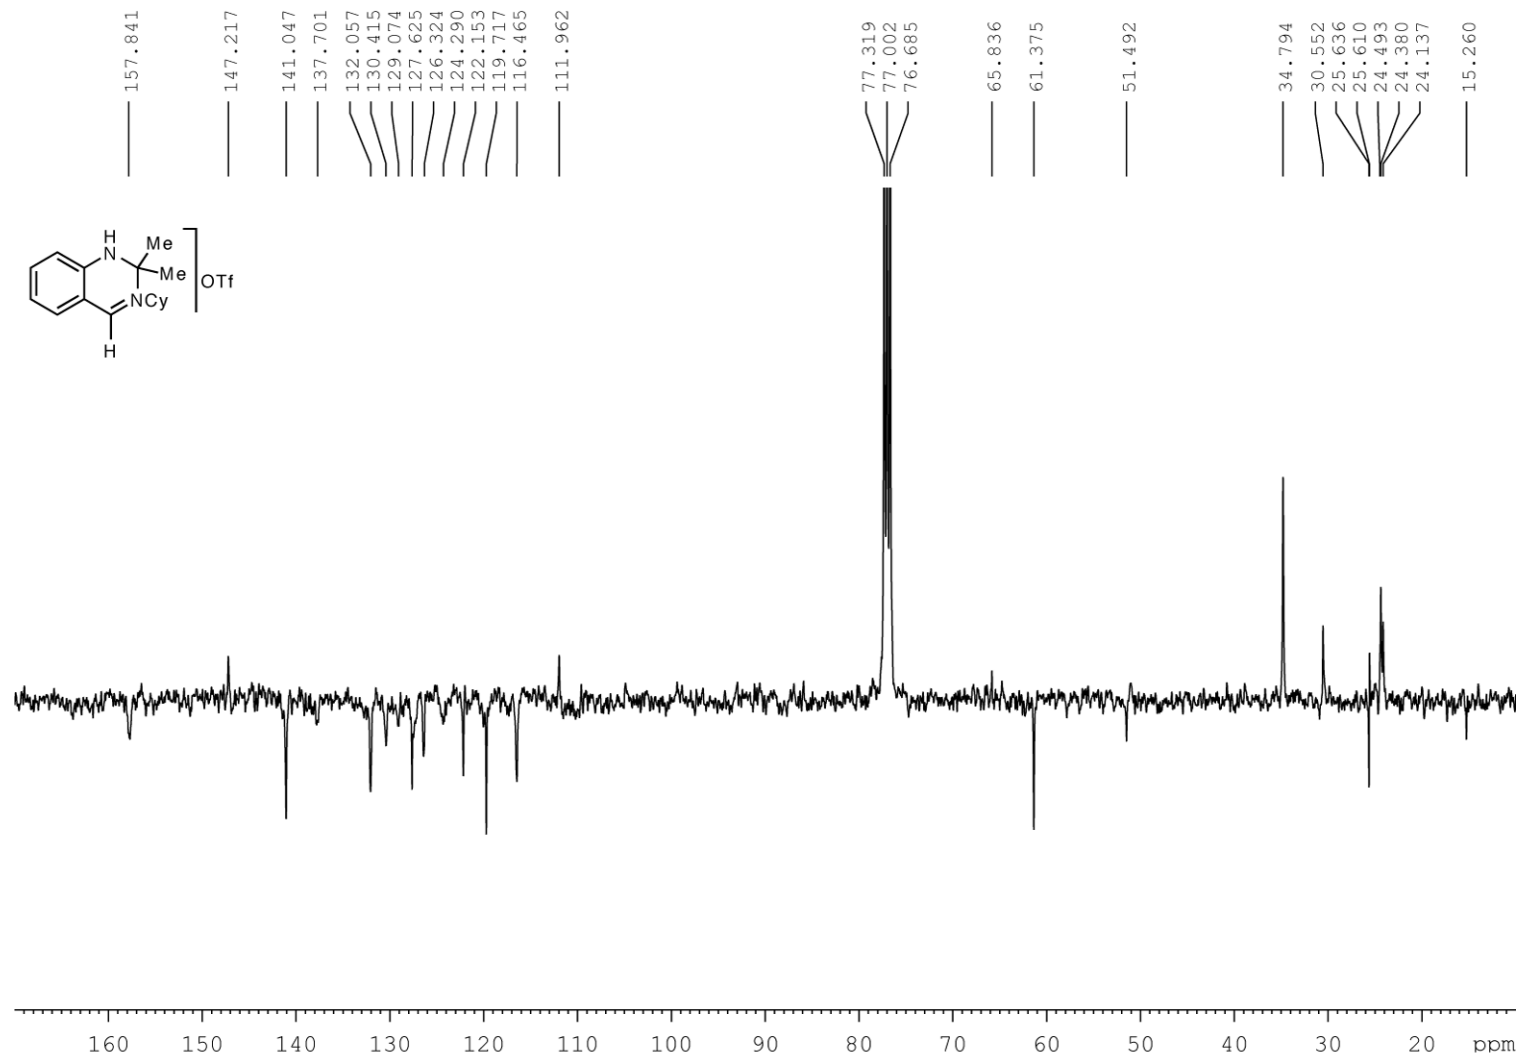



$^1\text{H}$  NMR spectra of **3c2**·0.7H<sub>2</sub>O (400 MHz, CDCl<sub>3</sub>, 25 °C, TMS).

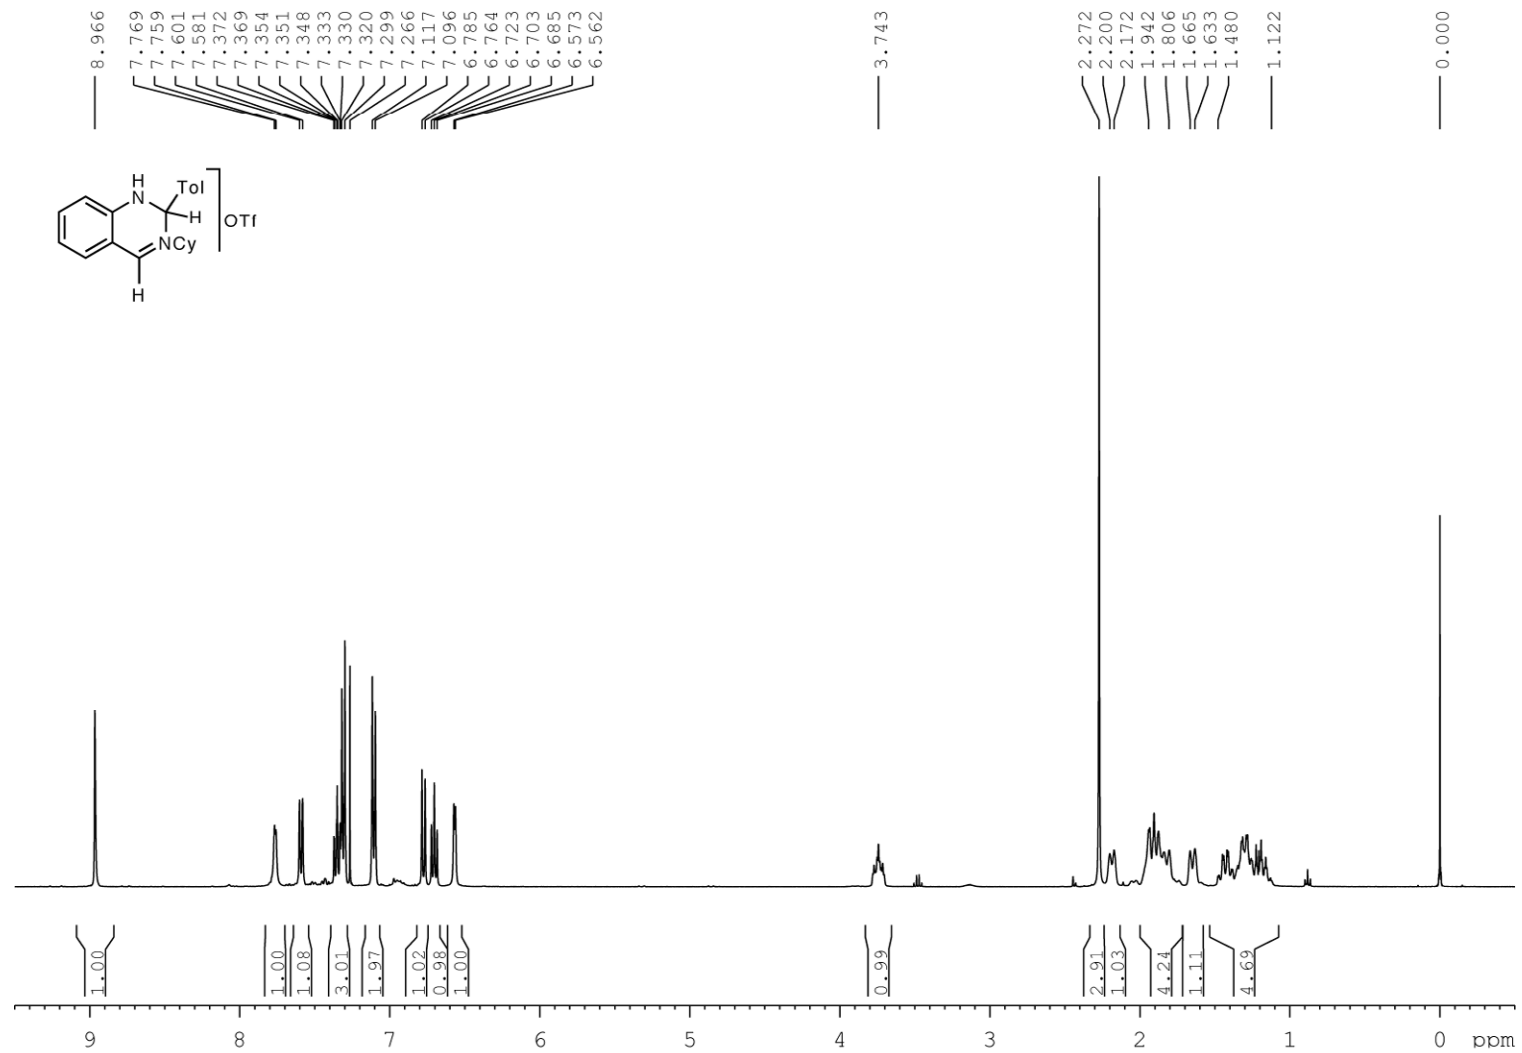

$^{13}\text{C}\{^1\text{H}\}$  NMR APT spectra of **3c2**·0.7H<sub>2</sub>O (100.8 MHz, CDCl<sub>3</sub>, 25 °C, TMS).

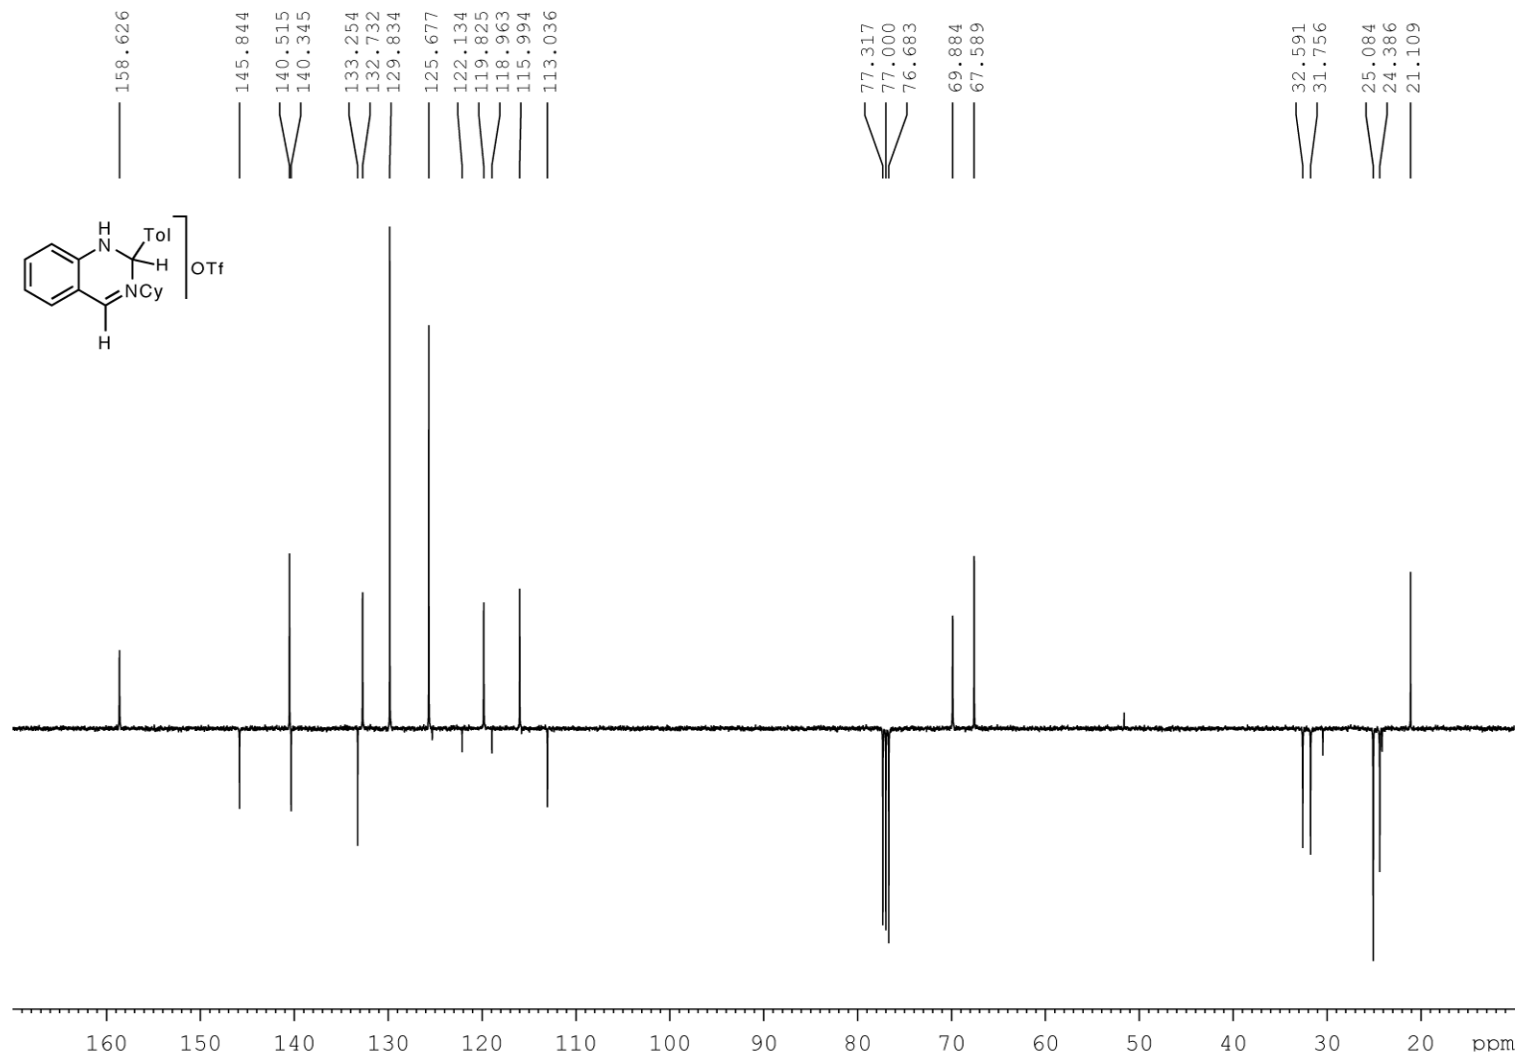

$^1\text{H}$  NMR spectra of **3c4** (400 MHz,  $\text{CDCl}_3$ , 25 °C, TMS).

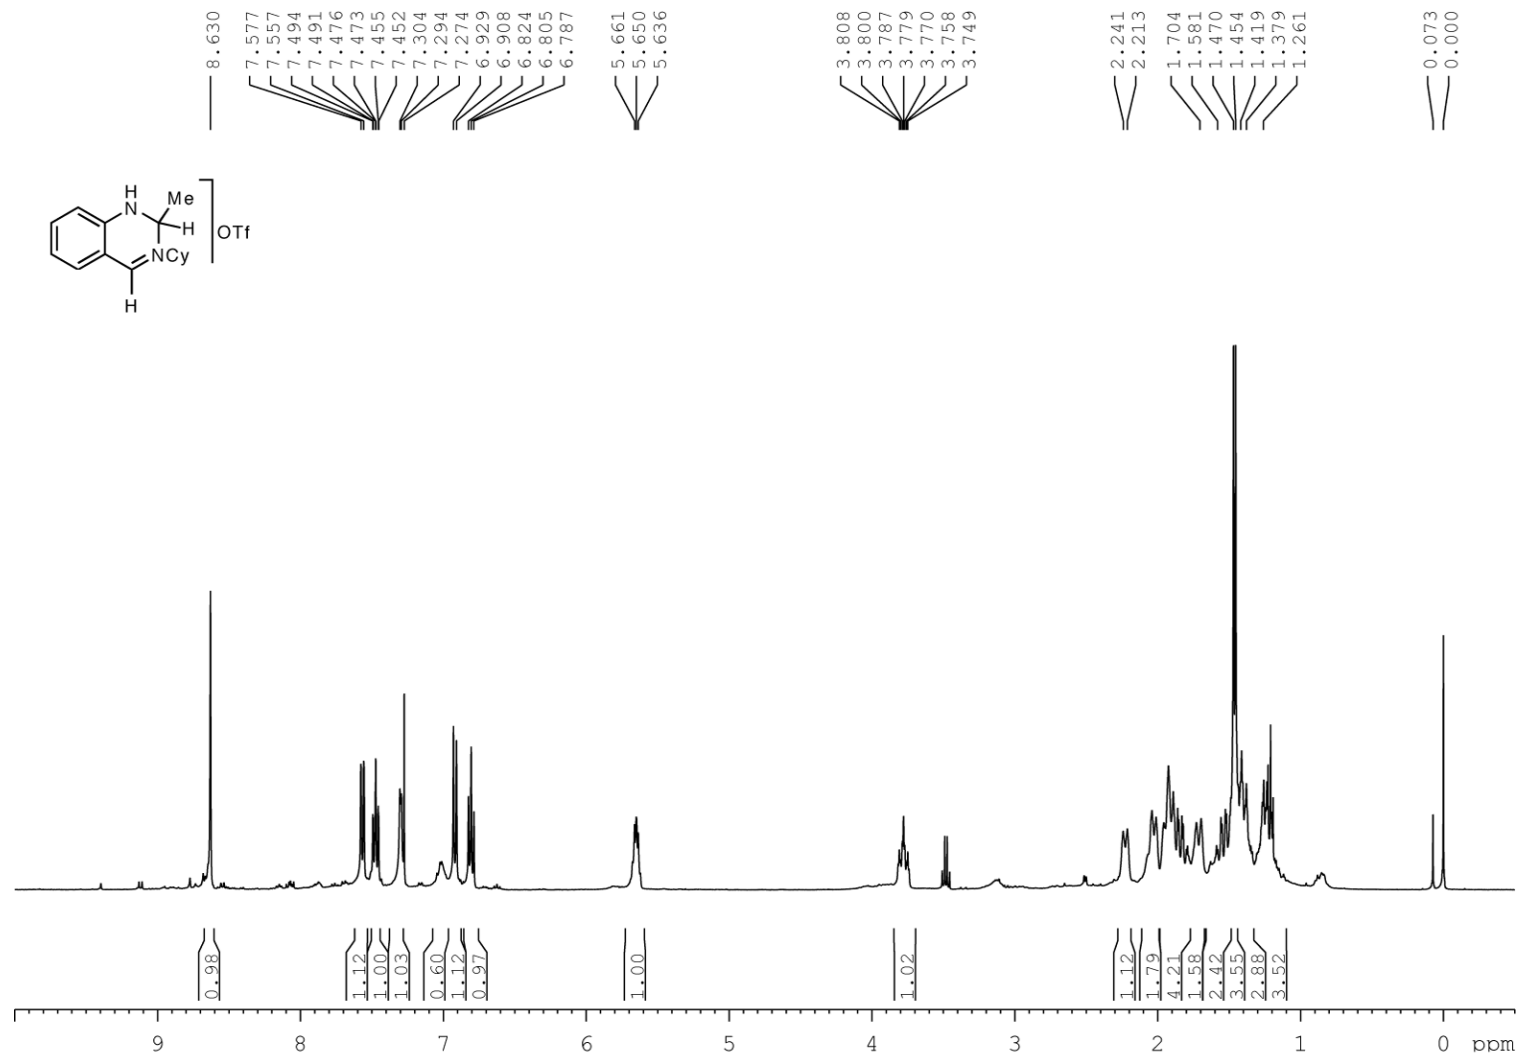

$^{13}\text{C}\{^1\text{H}\}$  NMR APT spectra of **3c4** (100.8 MHz,  $\text{CDCl}_3$ , 25 °C, TMS).

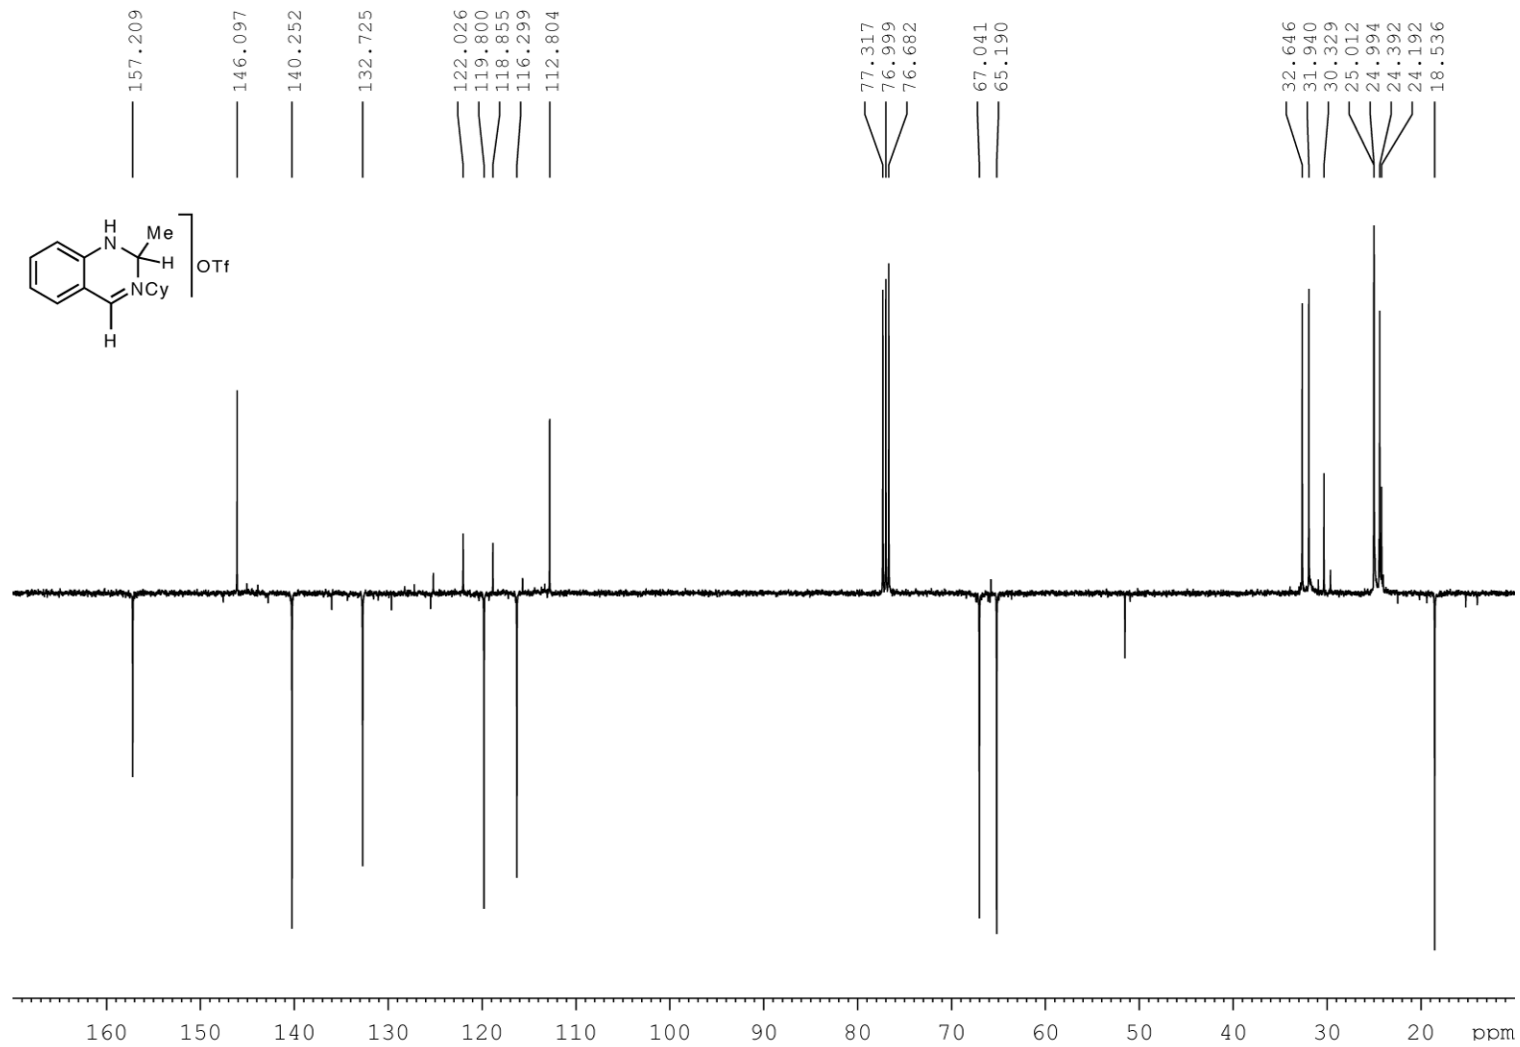

$^1\text{H}$  NMR spectra of **3d2**·H<sub>2</sub>O (400 MHz, CDCl<sub>3</sub>, 25 °C, TMS).

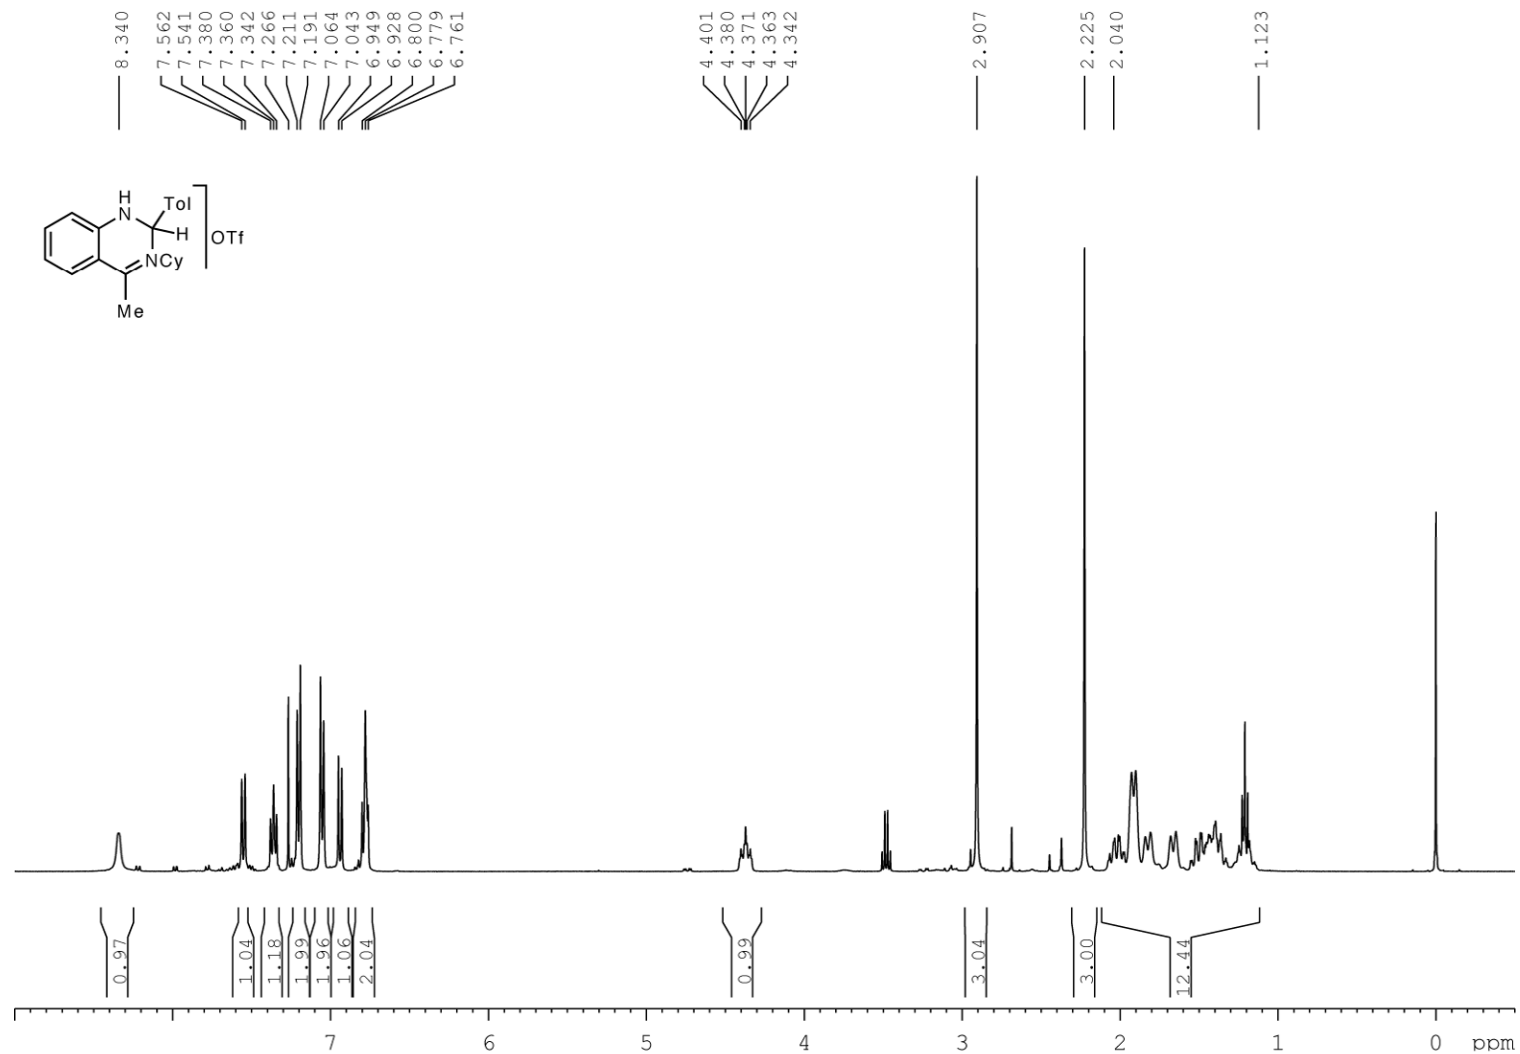

$^{13}\text{C}\{^1\text{H}\}$  NMR APT spectra of **3d2** (100.8 MHz,  $\text{CDCl}_3$ , 25 °C, TMS).

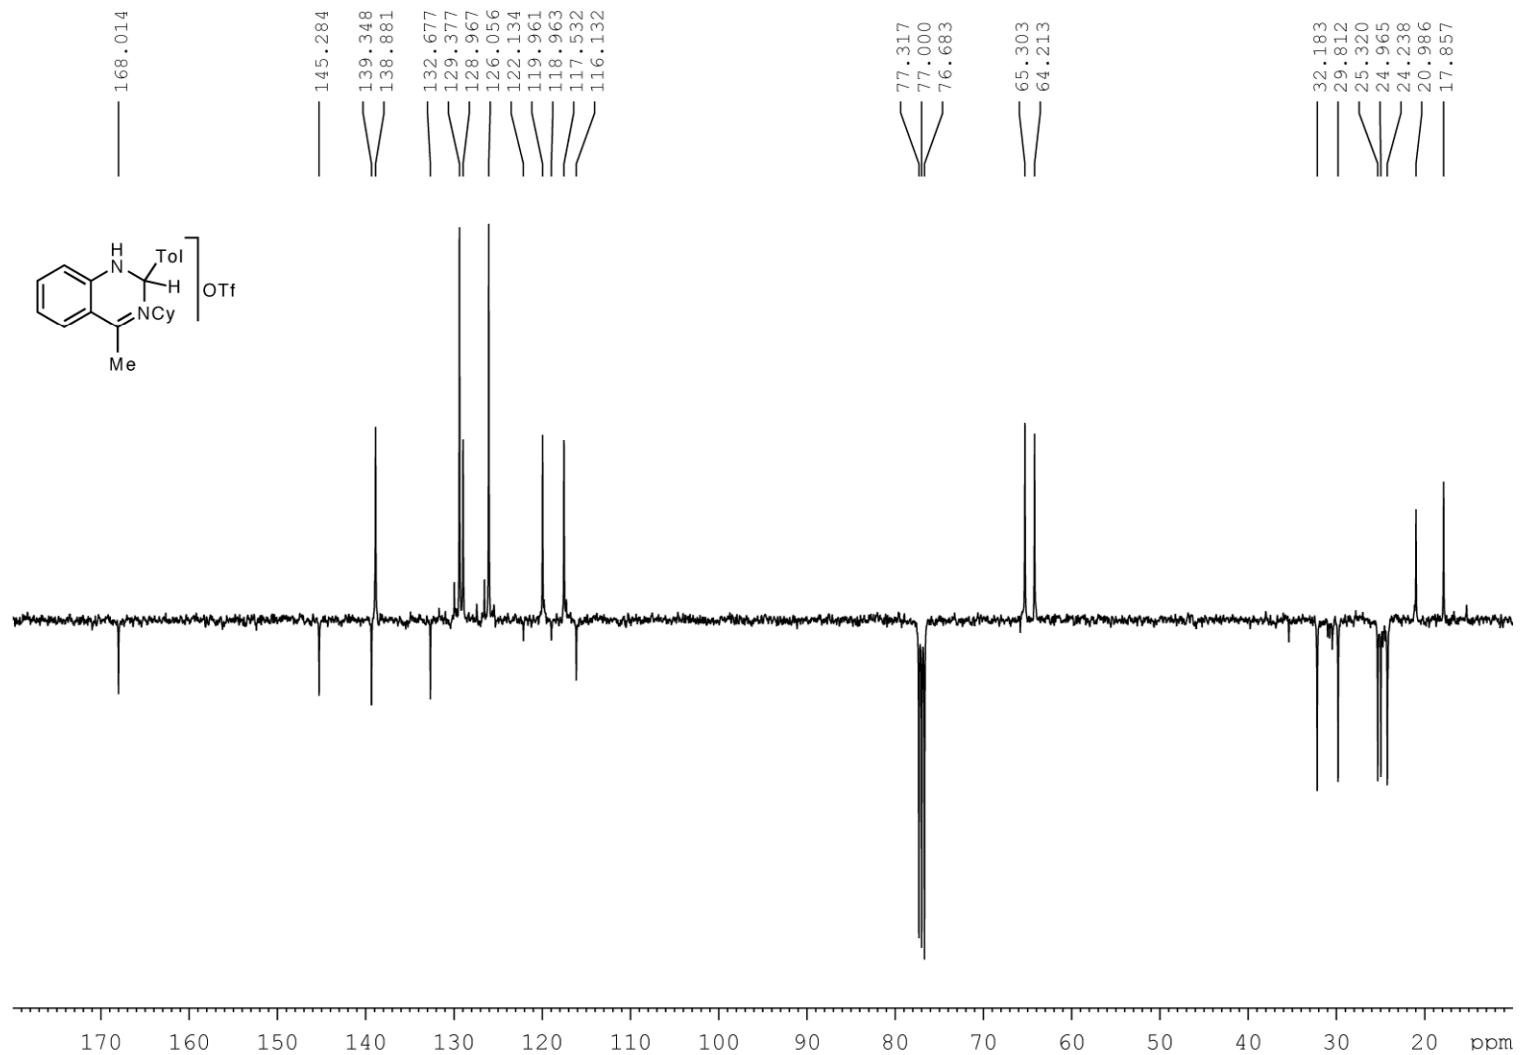

$^1\text{H}$  NMR spectra of **3d3**·0.5H<sub>2</sub>O (400 MHz, CDCl<sub>3</sub>, 25 °C, TMS).

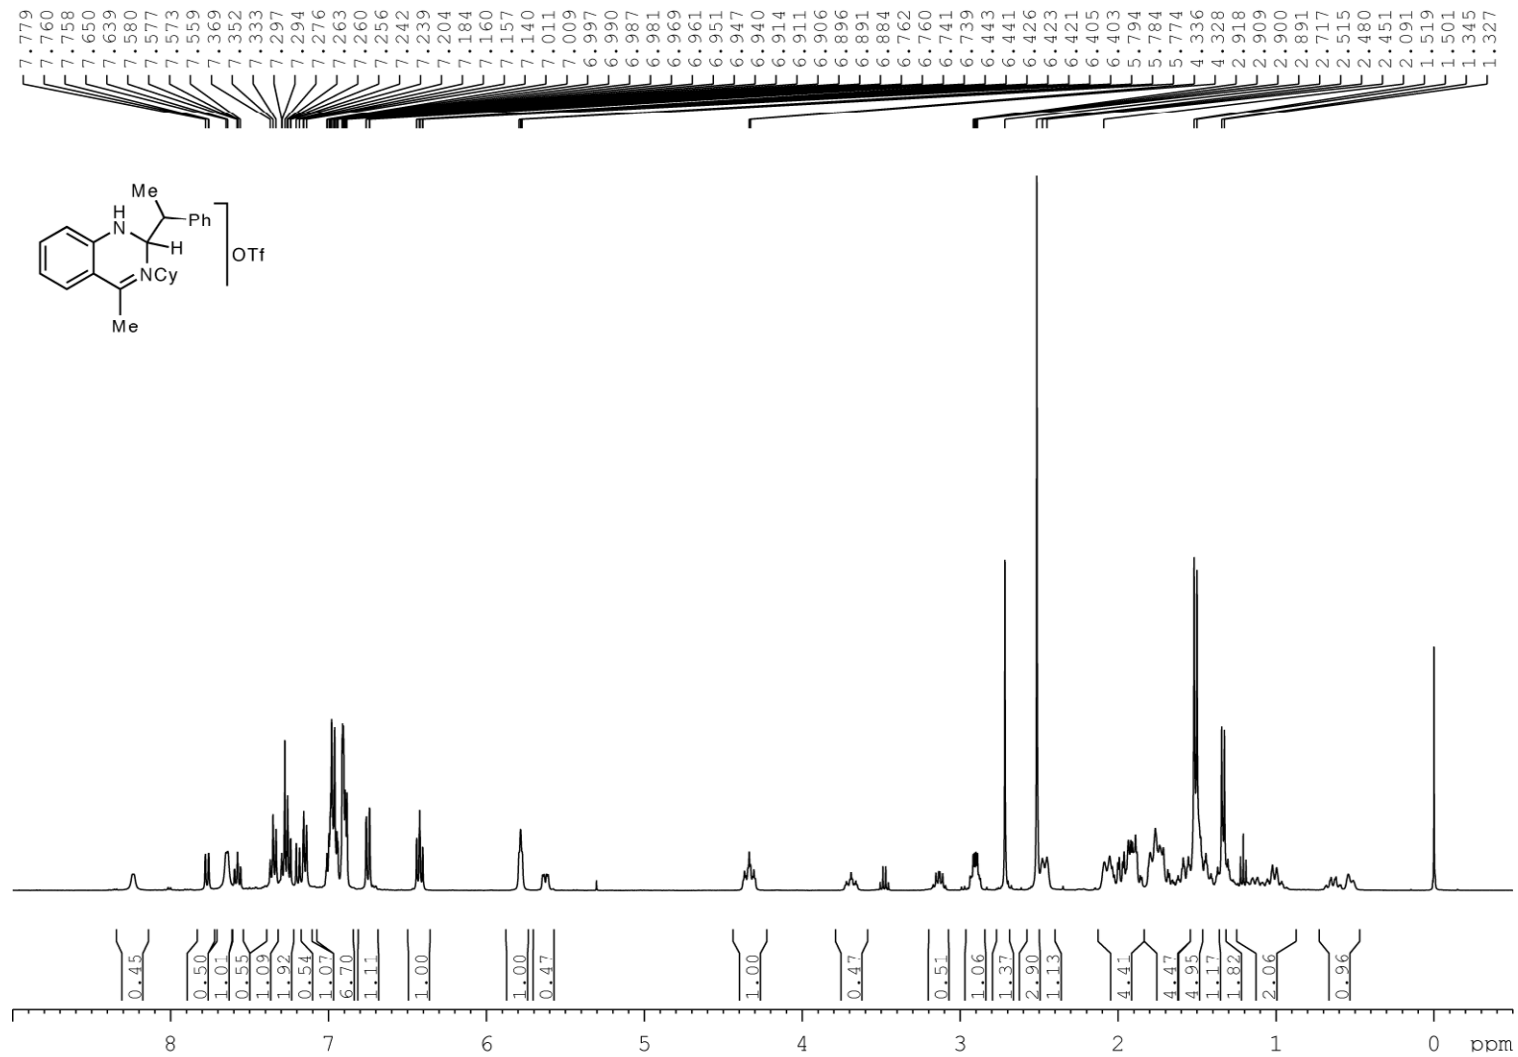

$^{13}\text{C}\{^1\text{H}\}$  NMR APT spectra of **3d3** (100.8 MHz,  $\text{CDCl}_3$ , 25 °C, TMS).

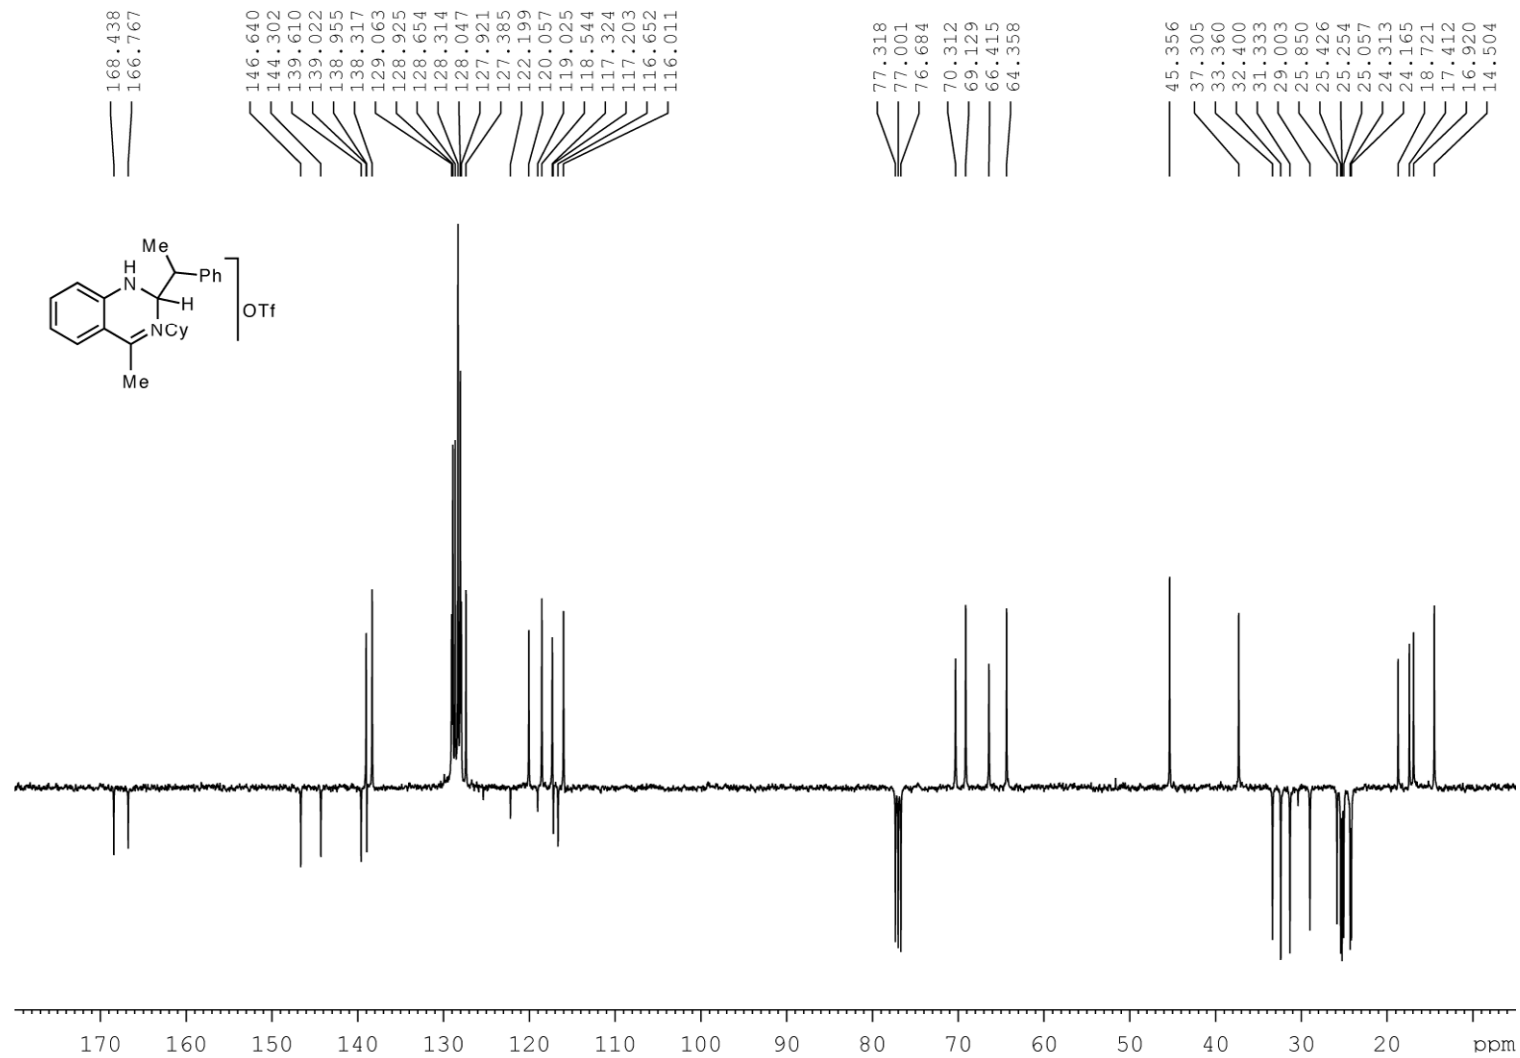



$^1\text{H}$  NMR spectra of **3d4** (400 MHz,  $\text{CDCl}_3$ , 25 °C, TMS).

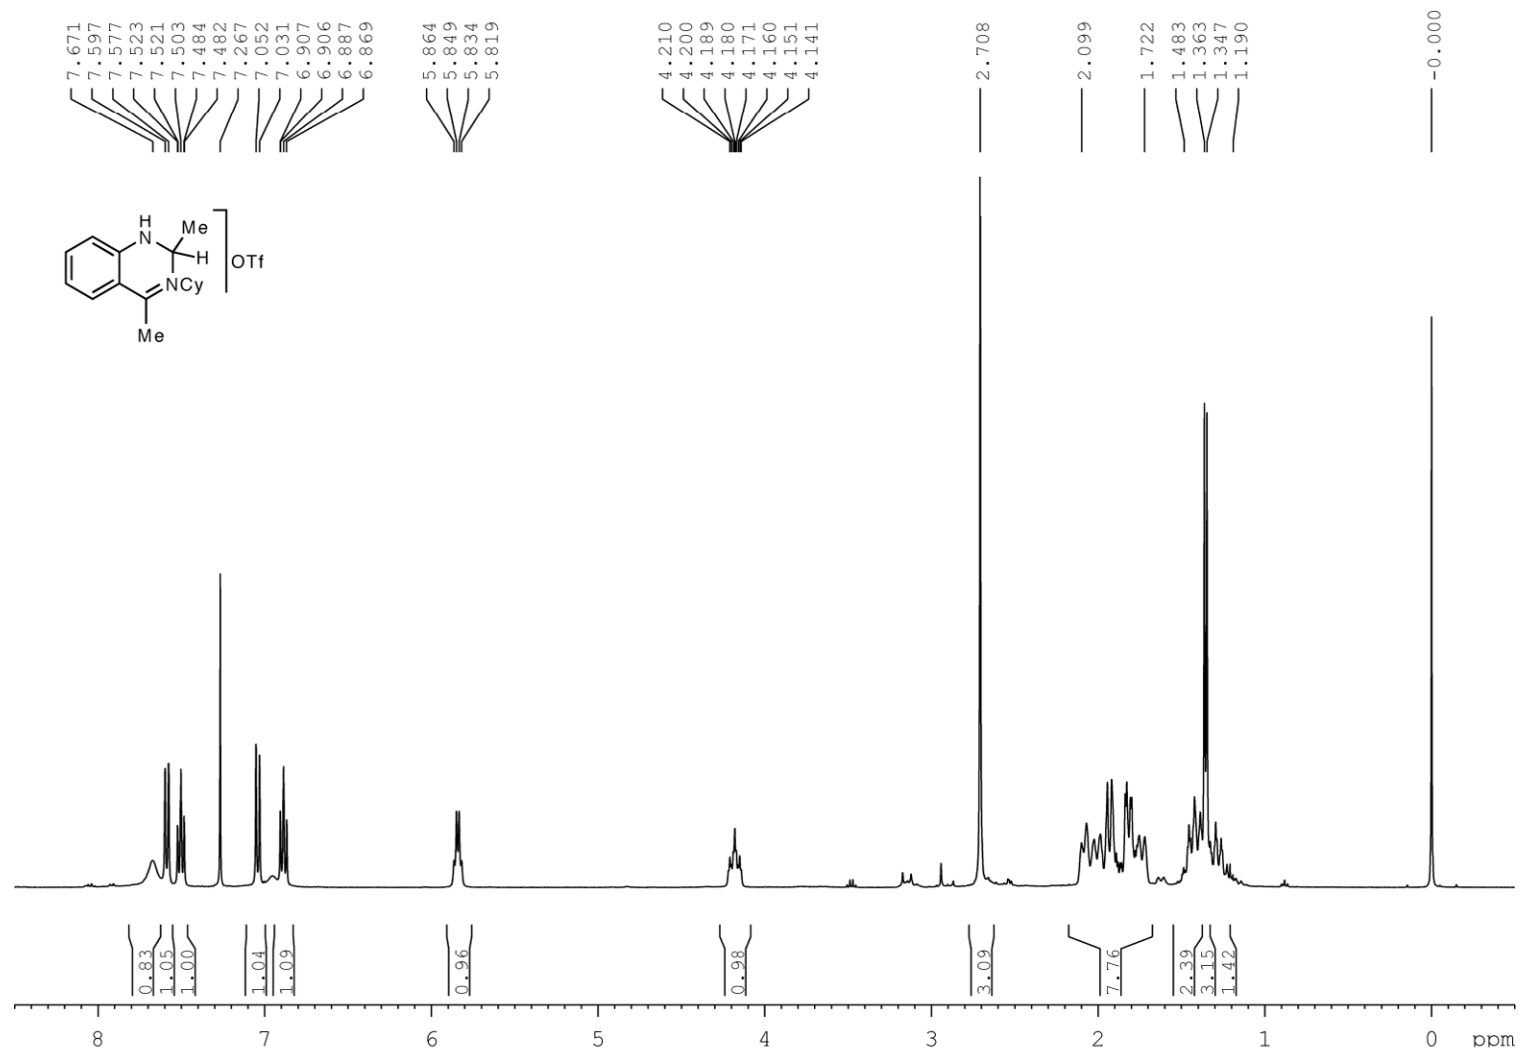

$^{13}\text{C}\{^1\text{H}\}$  NMR APT spectra of **3d4** (100.8 MHz,  $\text{CDCl}_3$ , 25 °C, TMS).

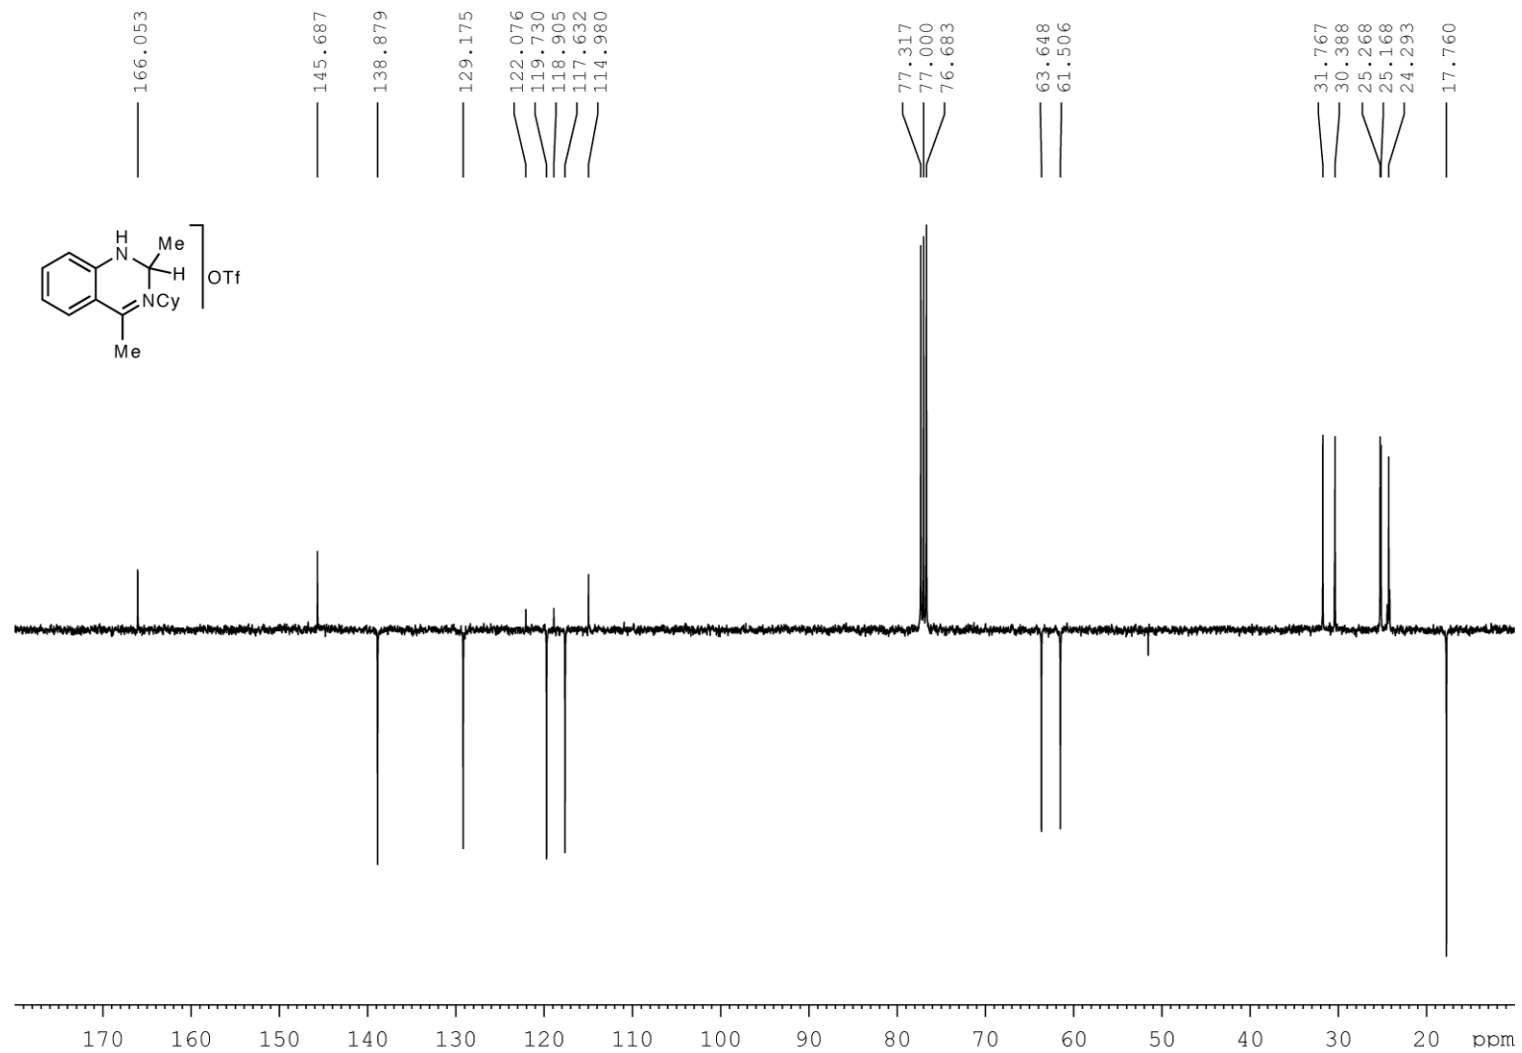

$^1\text{H}$  NMR spectra of **3d5** (400 MHz,  $\text{CDCl}_3$ ,  $0^\circ\text{C}$ , TMS).

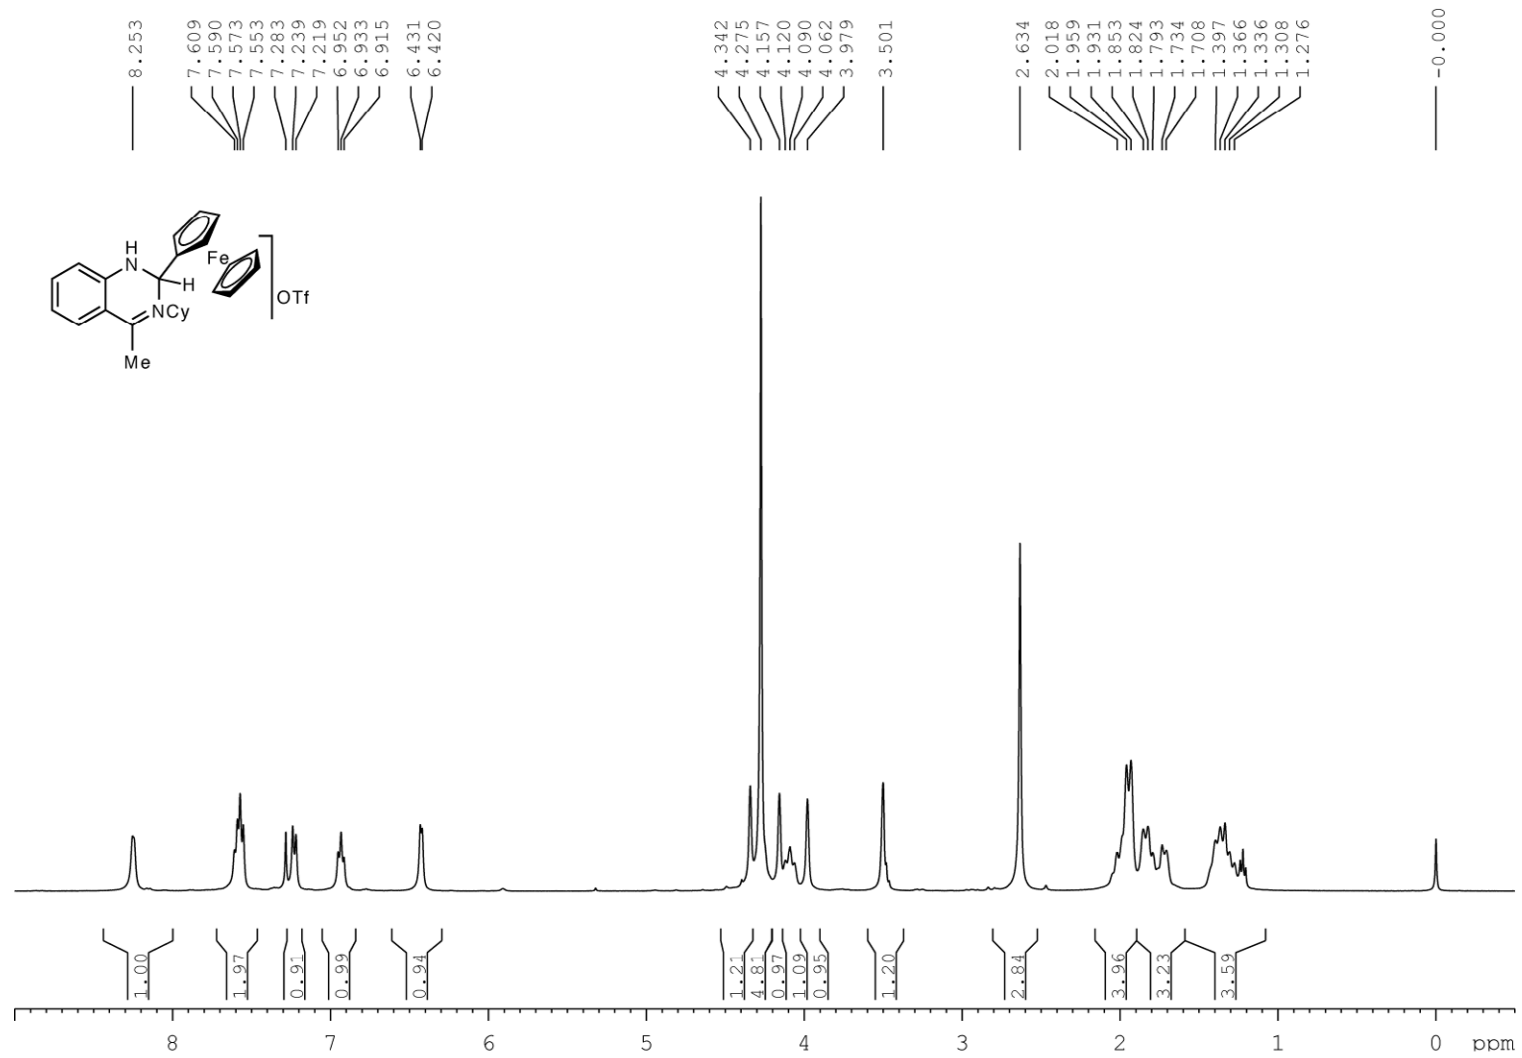

$^1\text{H}$  NMR spectra of **3d5** (400 MHz,  $\text{CDCl}_3$ , 25 °C, TMS).

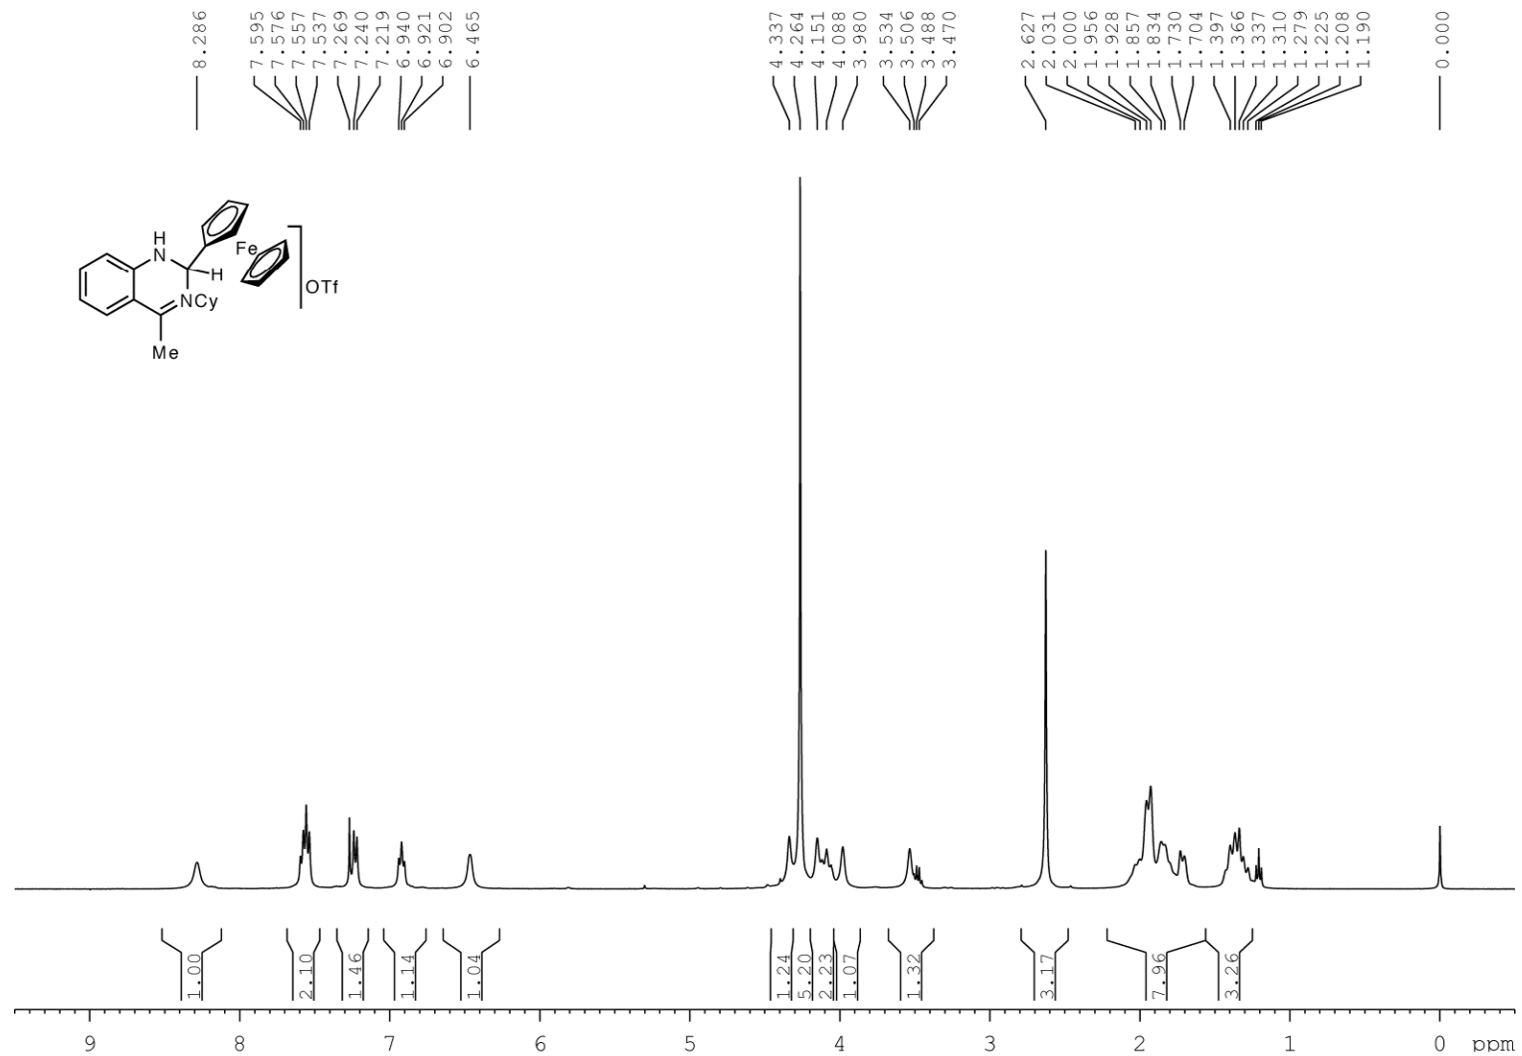

$^{13}\text{C}\{^1\text{H}\}$  NMR APT spectra of **3d5** (100.8 MHz,  $\text{CDCl}_3$ , 0 °C, TMS).

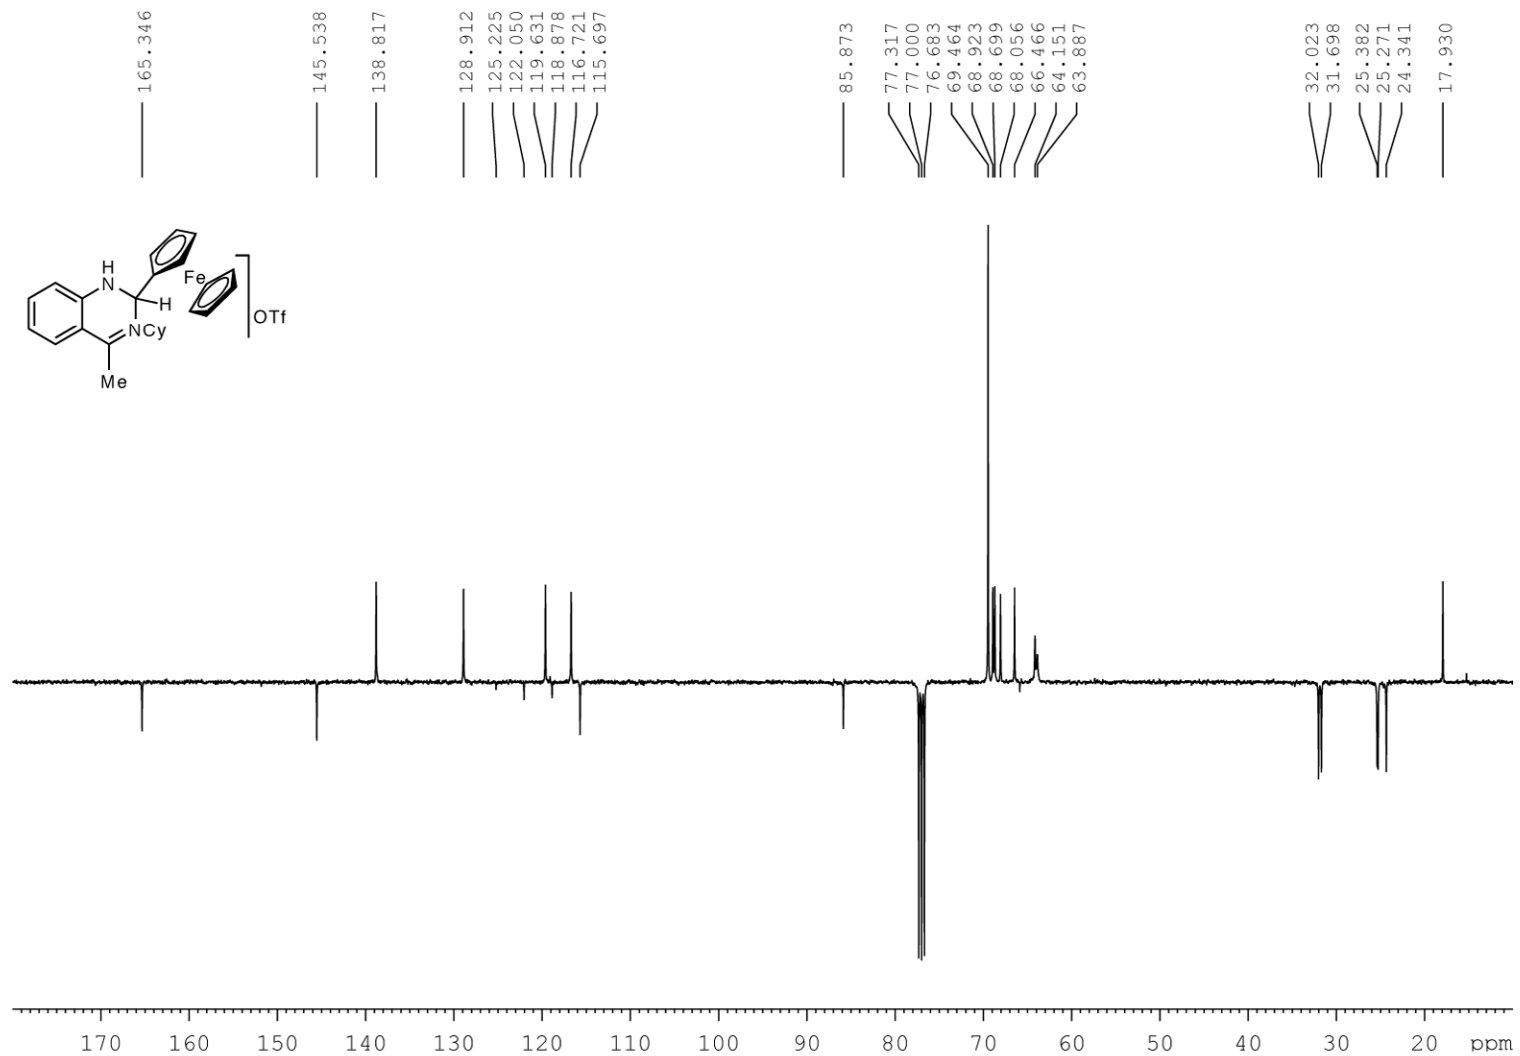

$^1\text{H}$  NMR spectra of **3e2**·0.5H<sub>2</sub>O (400 MHz, CDCl<sub>3</sub>, 25 °C, TMS).

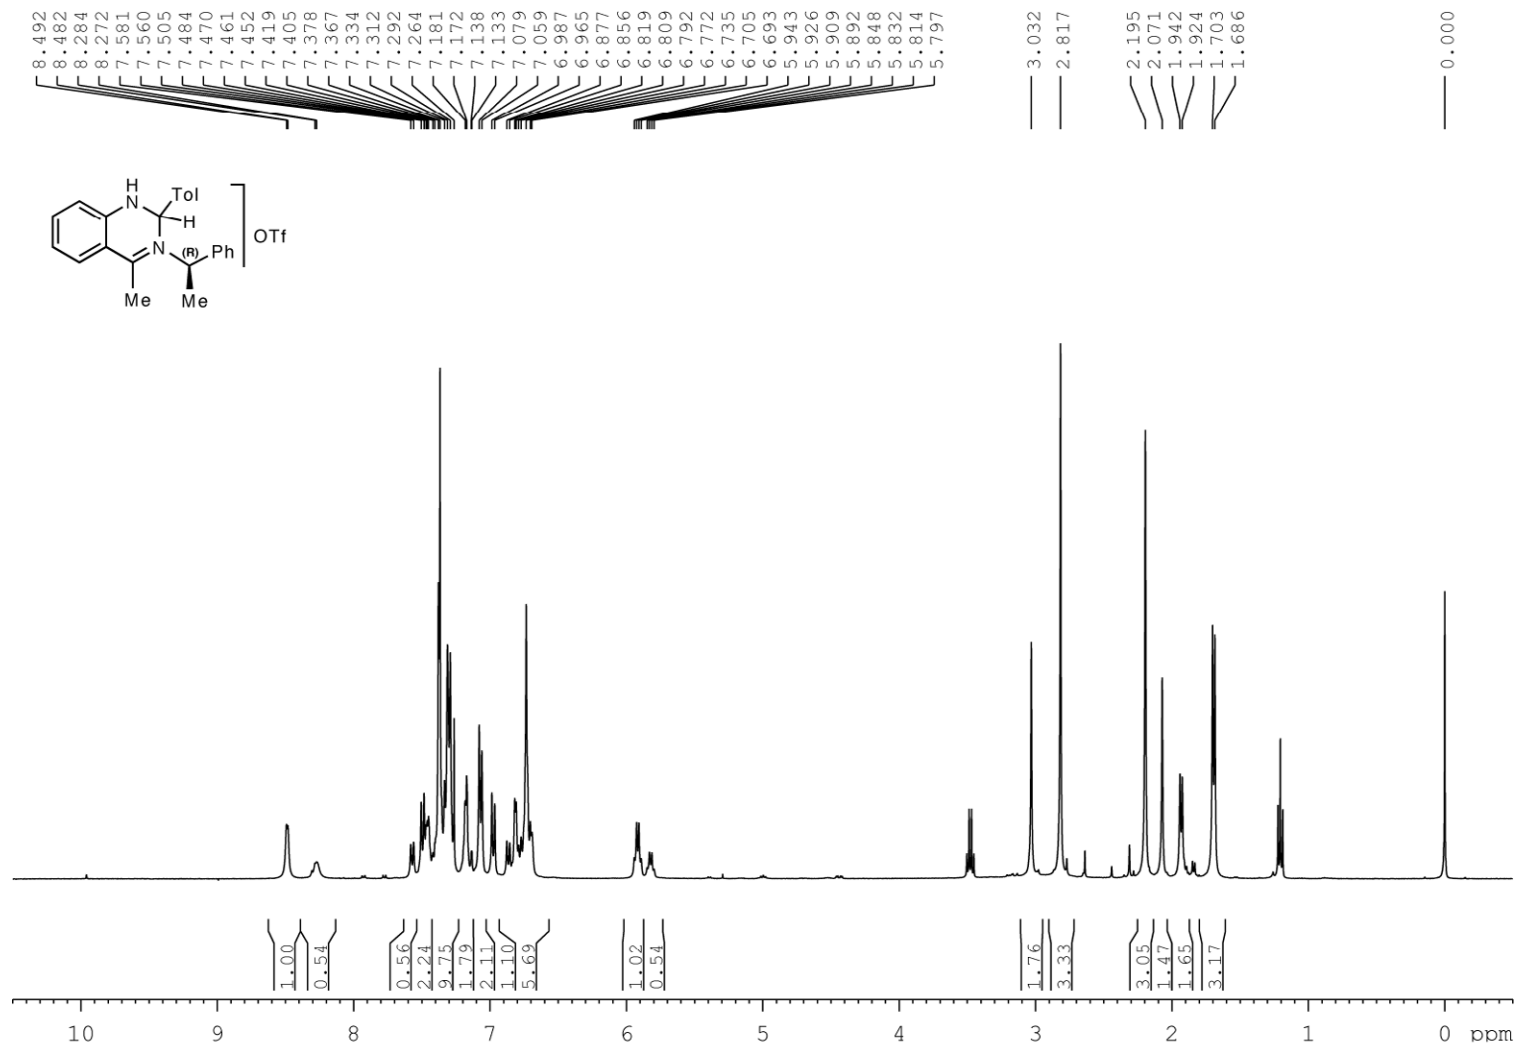

$^{13}\text{C}\{^1\text{H}\}$  NMR APT spectra of **3e2** (100.8 MHz,  $\text{CDCl}_3$ , 25 °C, TMS).

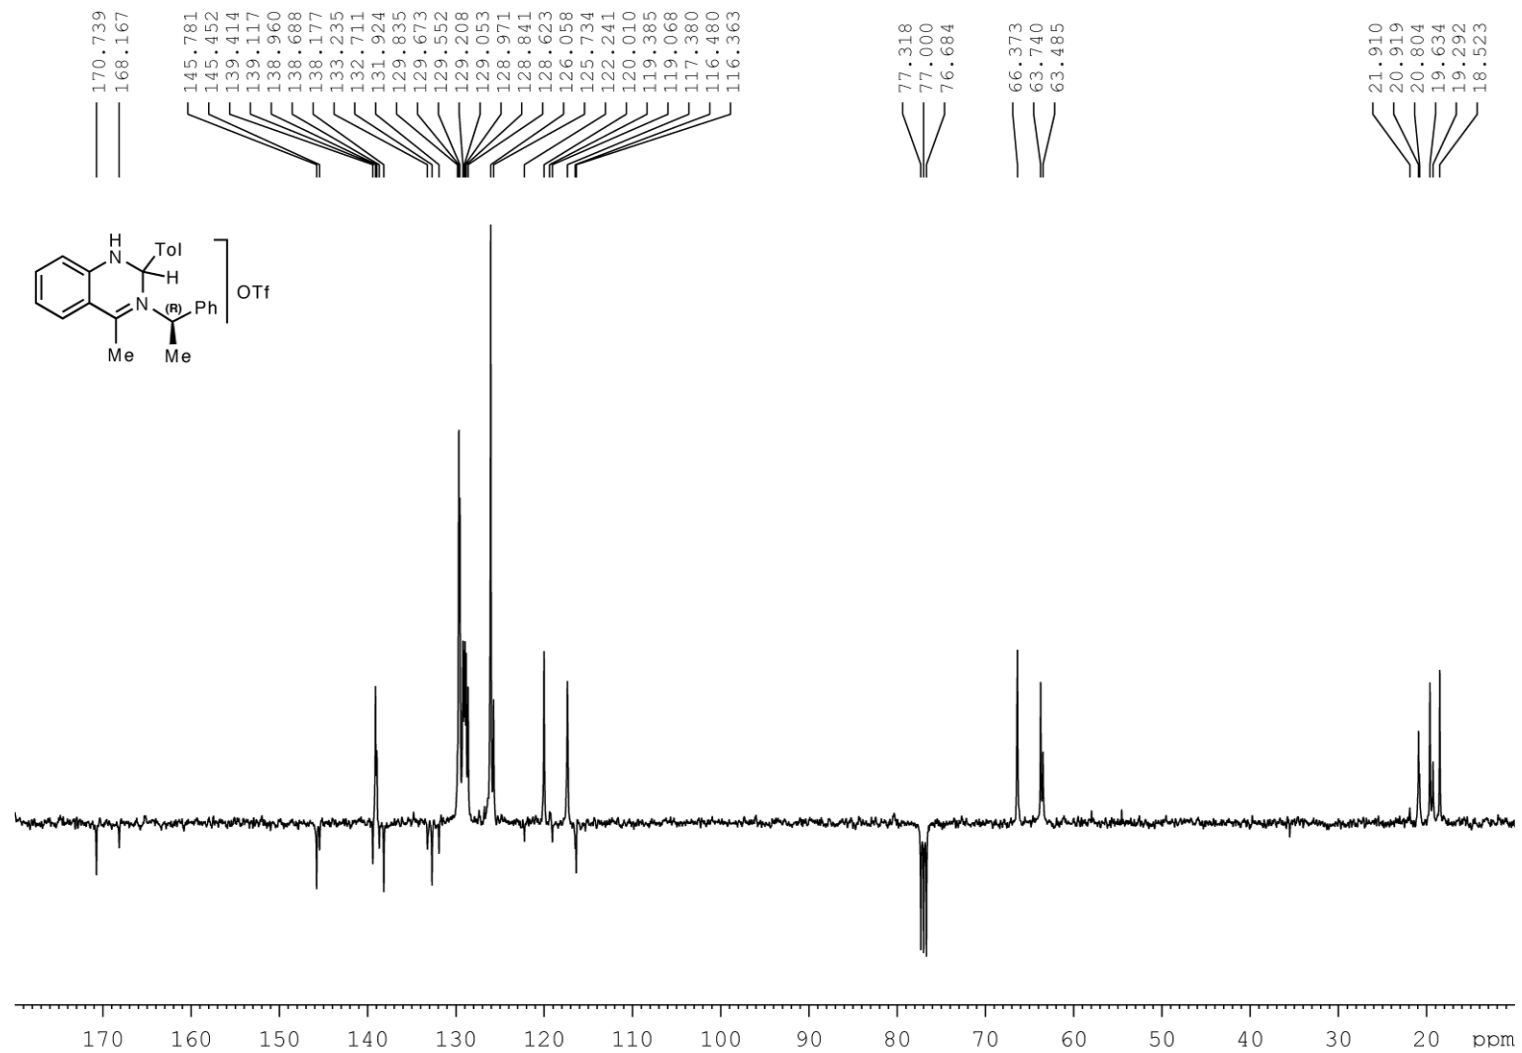

$^1\text{H}$  NMR spectra of **3e4** (400 MHz,  $\text{CDCl}_3$ , 25 °C, TMS).

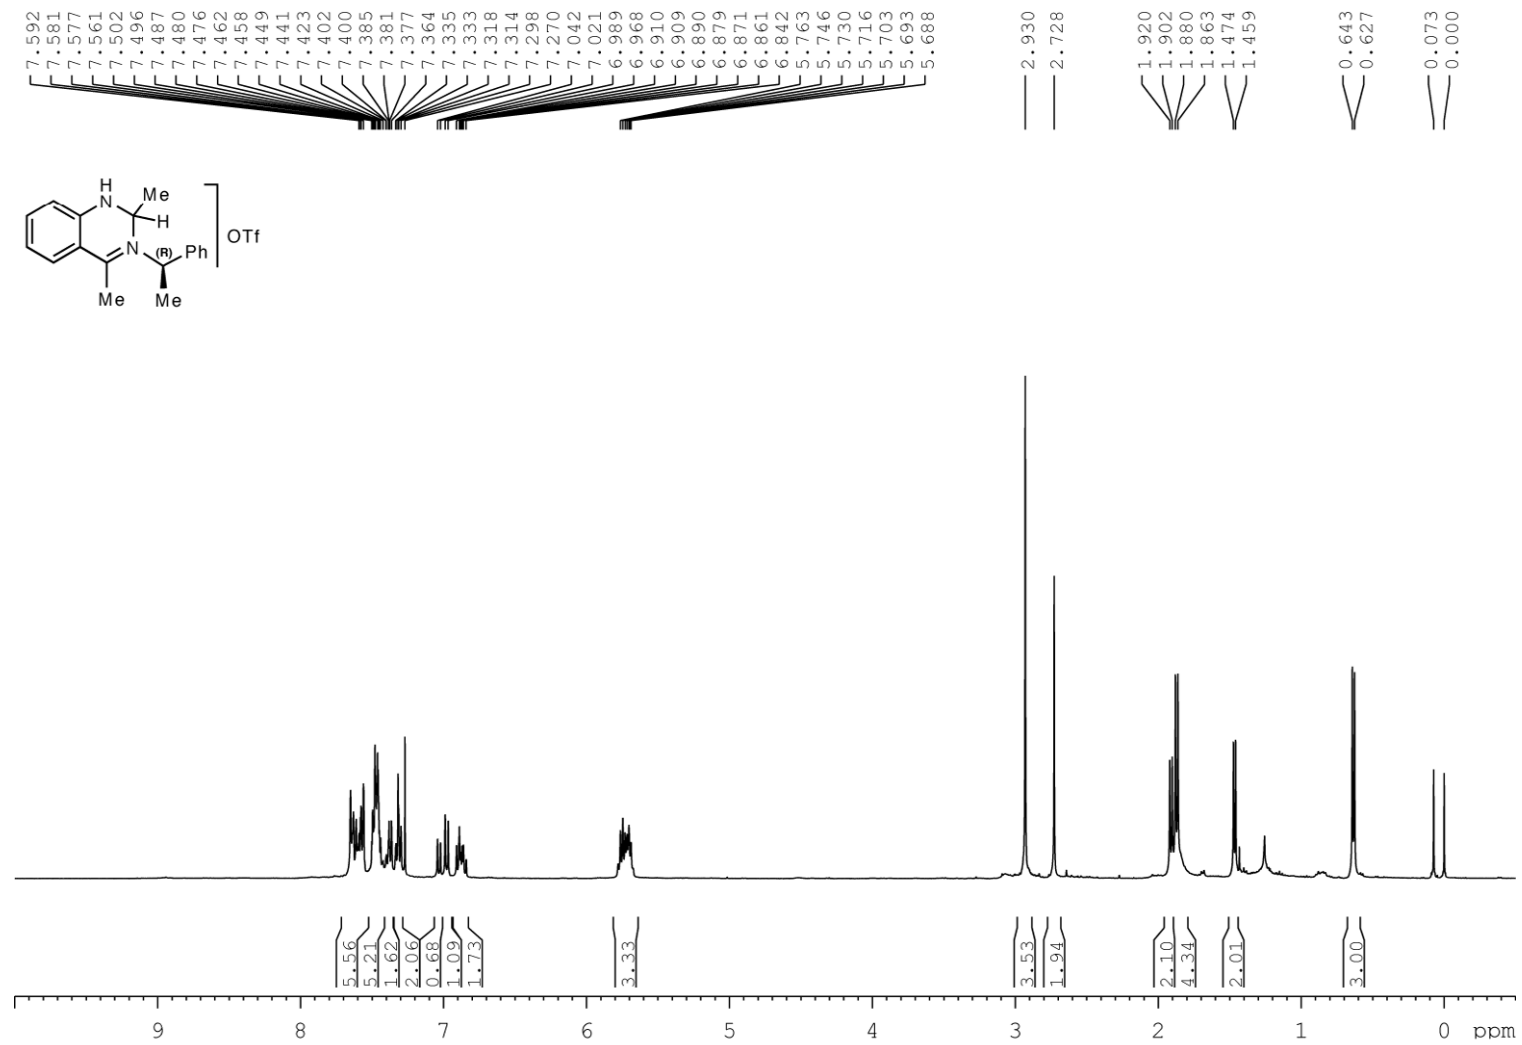



$^{13}\text{C}\{^1\text{H}\}$  NMR APT spectra of **3e4** (100.8 MHz,  $\text{CDCl}_3$ , 25 °C, TMS).

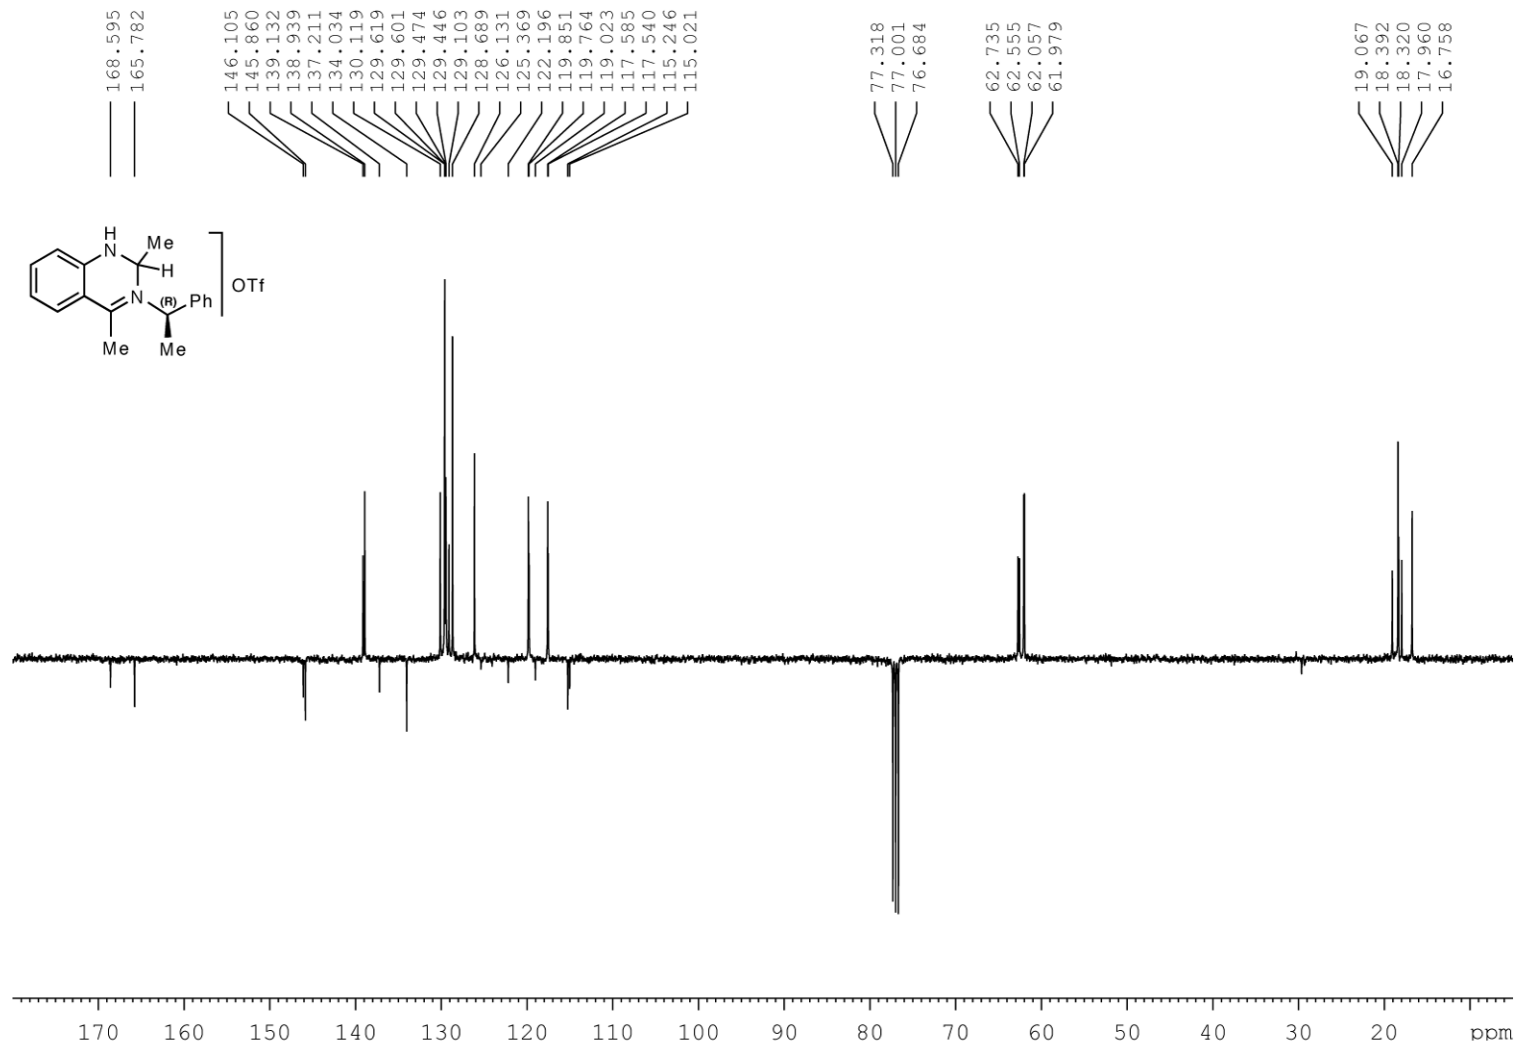

$^1\text{H}$  NMR spectra of **4** (300 MHz,  $\text{CDCl}_3$ , 25 °C, TMS).

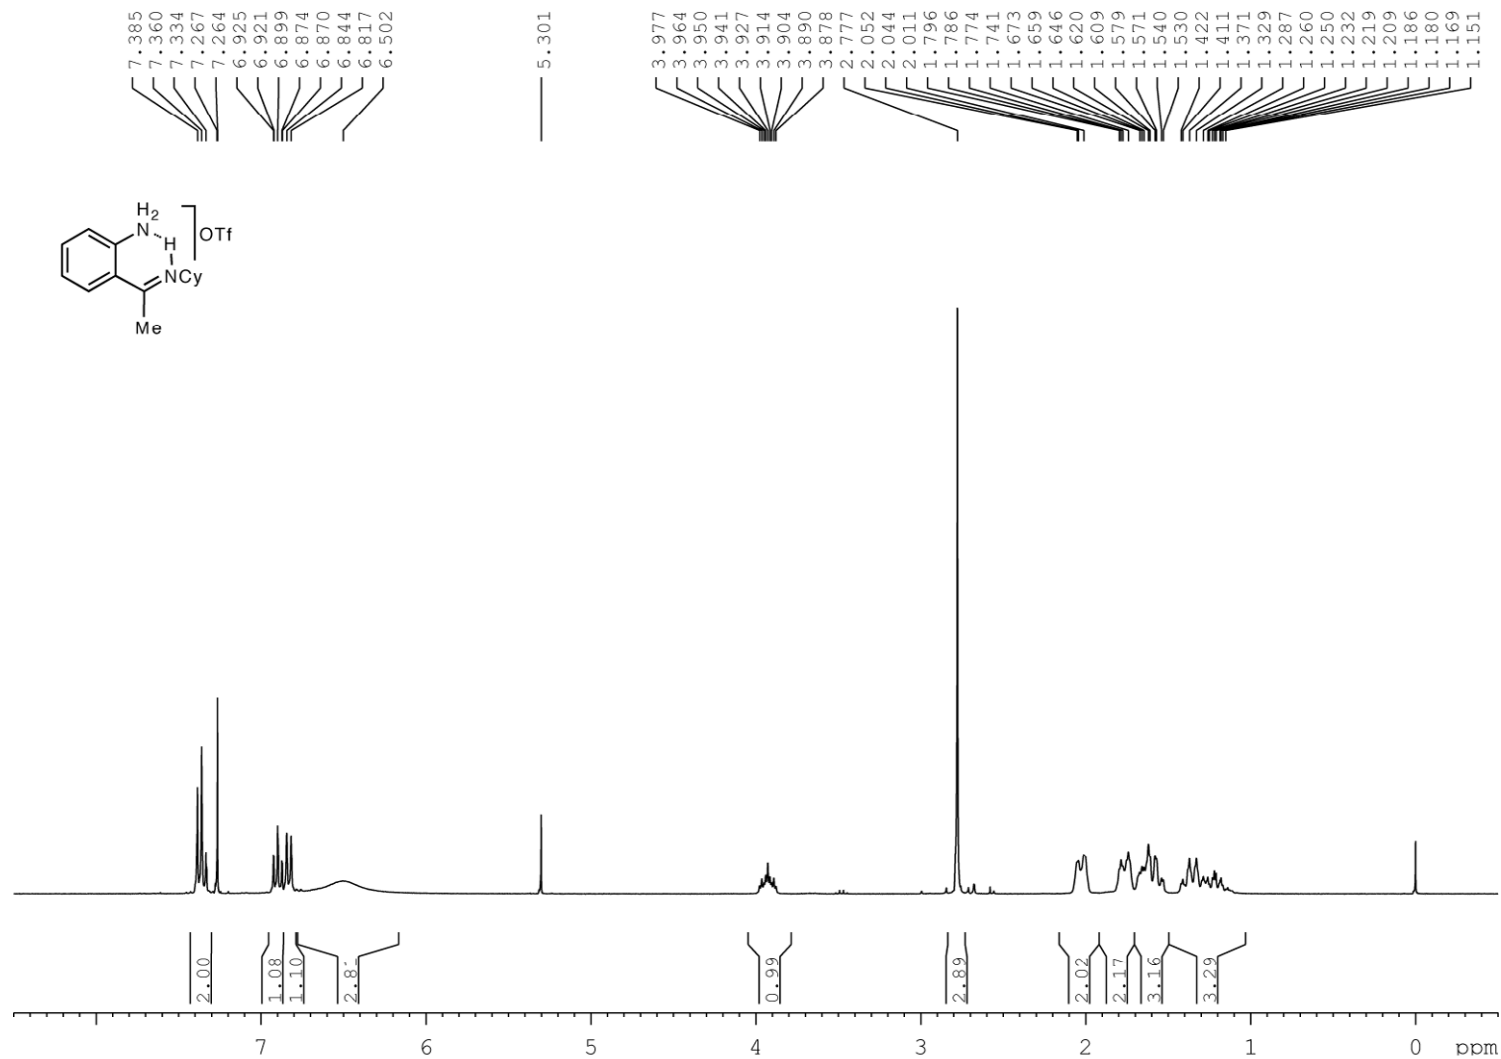

$^{13}\text{C}\{^1\text{H}\}$  NMR APT spectra of **4** (100.8 MHz,  $\text{CDCl}_3$ , 25 °C, TMS).

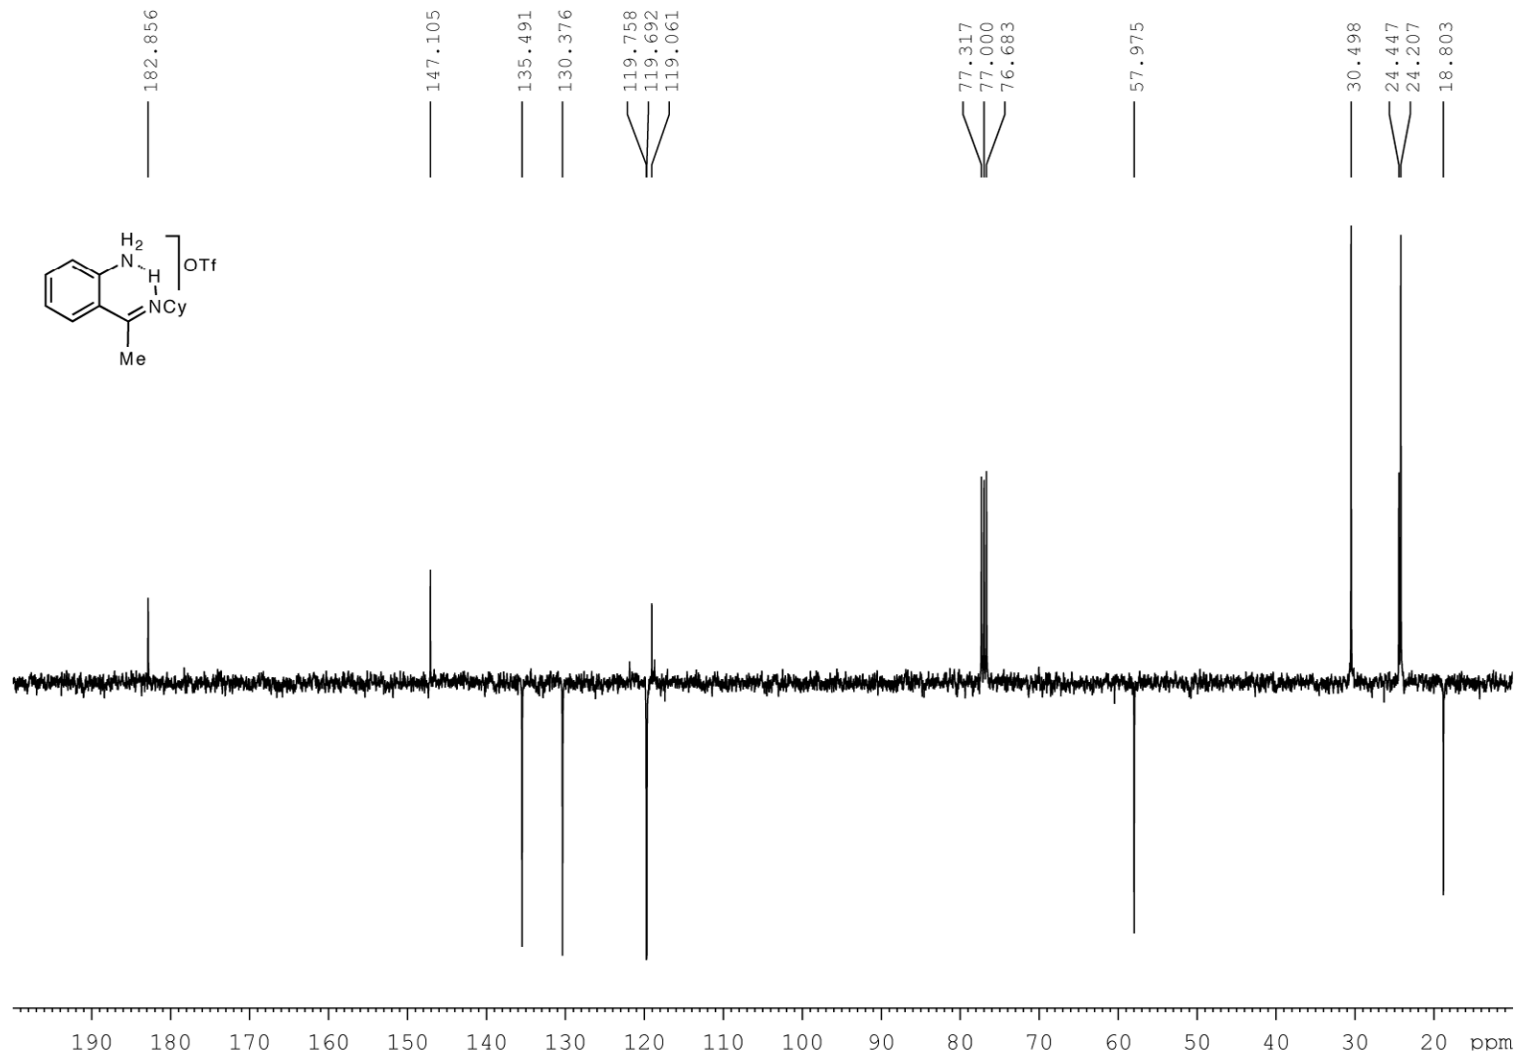

$^1\text{H}$  NMR spectra of **5b** (400 MHz,  $\text{CD}_3\text{CN}$ , 25 °C, TMS).

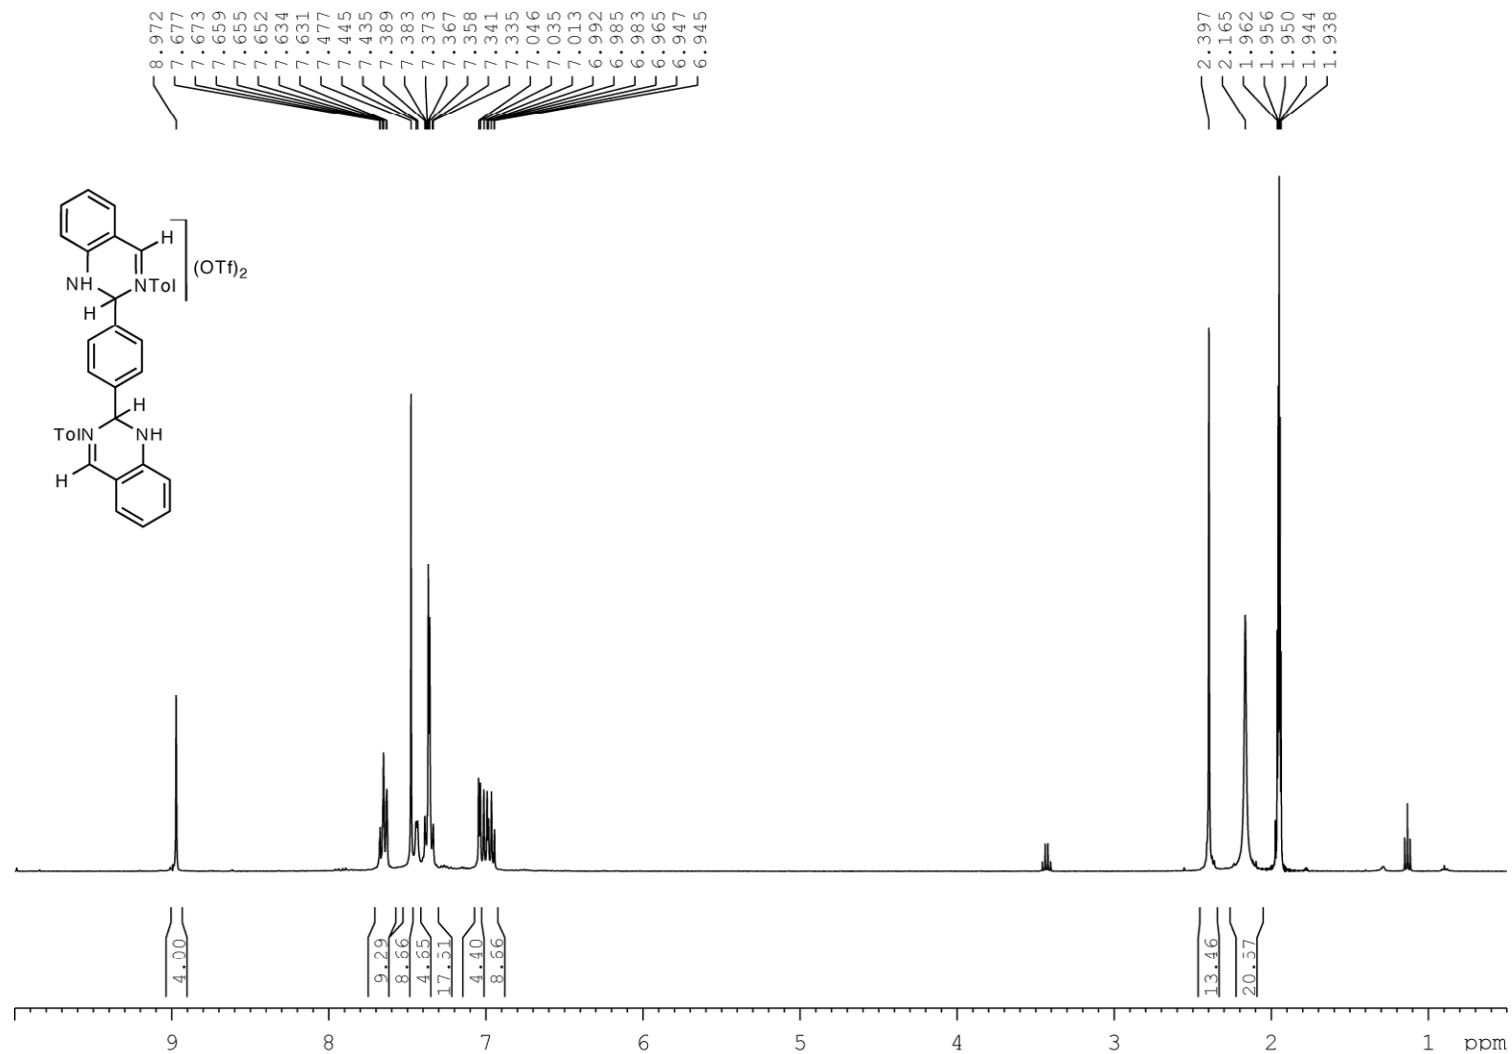

$^1\text{H}$  NMR spectra of **5b** (600 MHz,  $\text{CD}_3\text{CN}$ ,  $-10^\circ\text{C}$ , TMS).

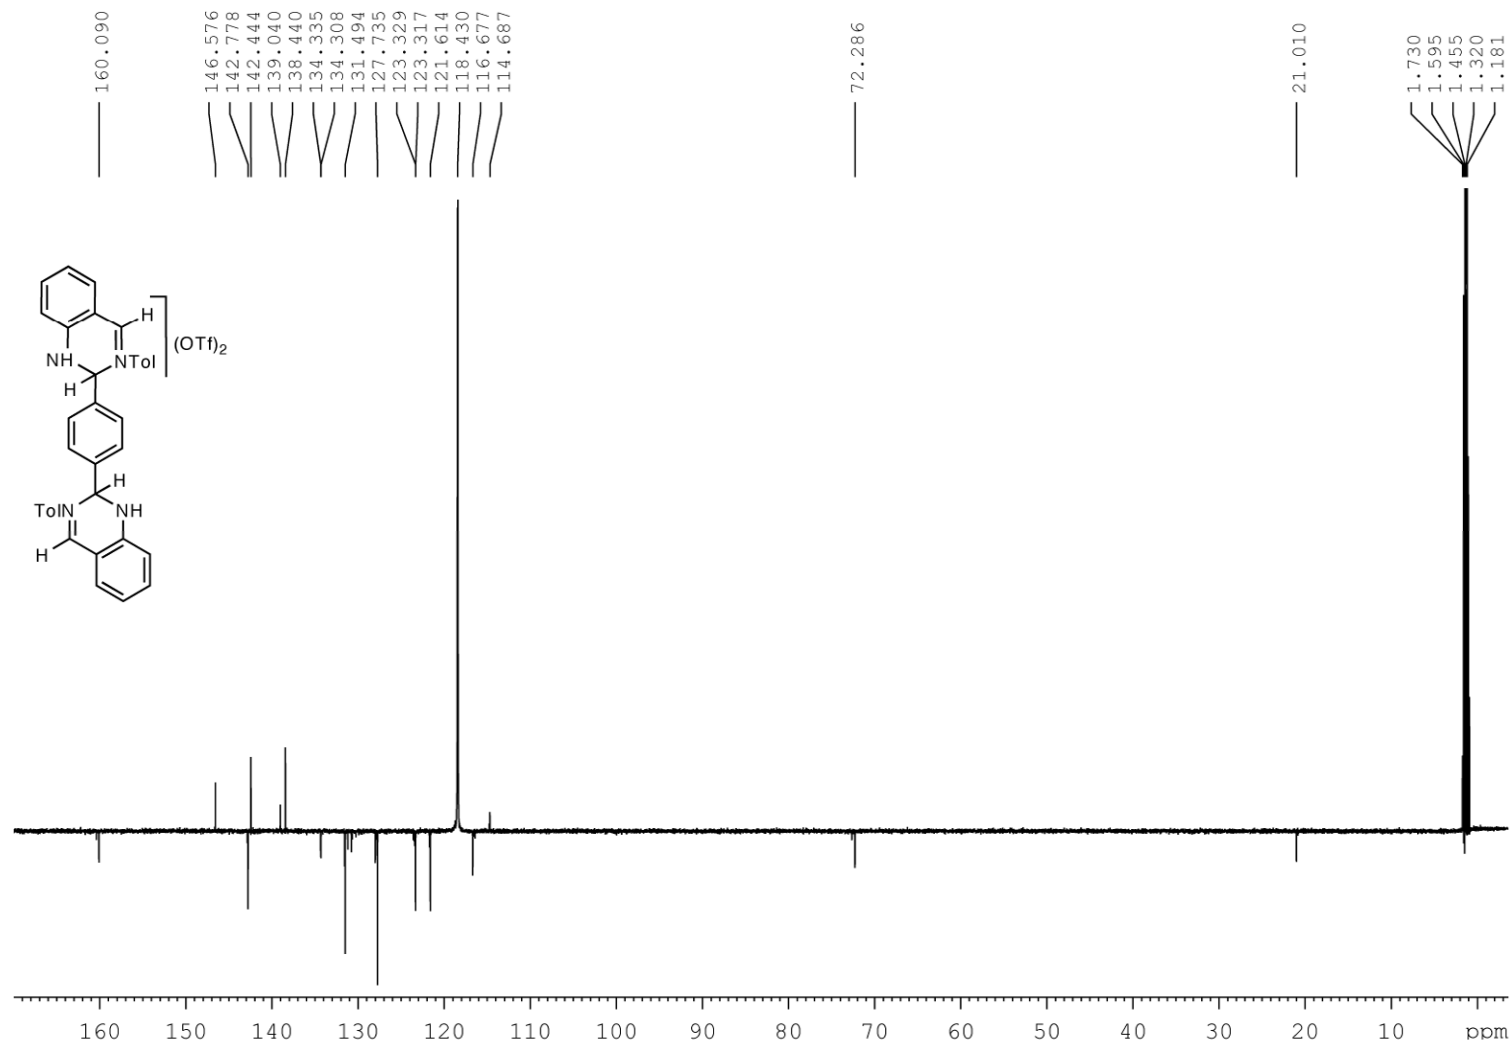

$^{13}\text{C}\{^1\text{H}\}$  NMR APT spectra of **5b** (100.8 MHz,  $\text{CD}_3\text{CN}$ , 25 °C, TMS).

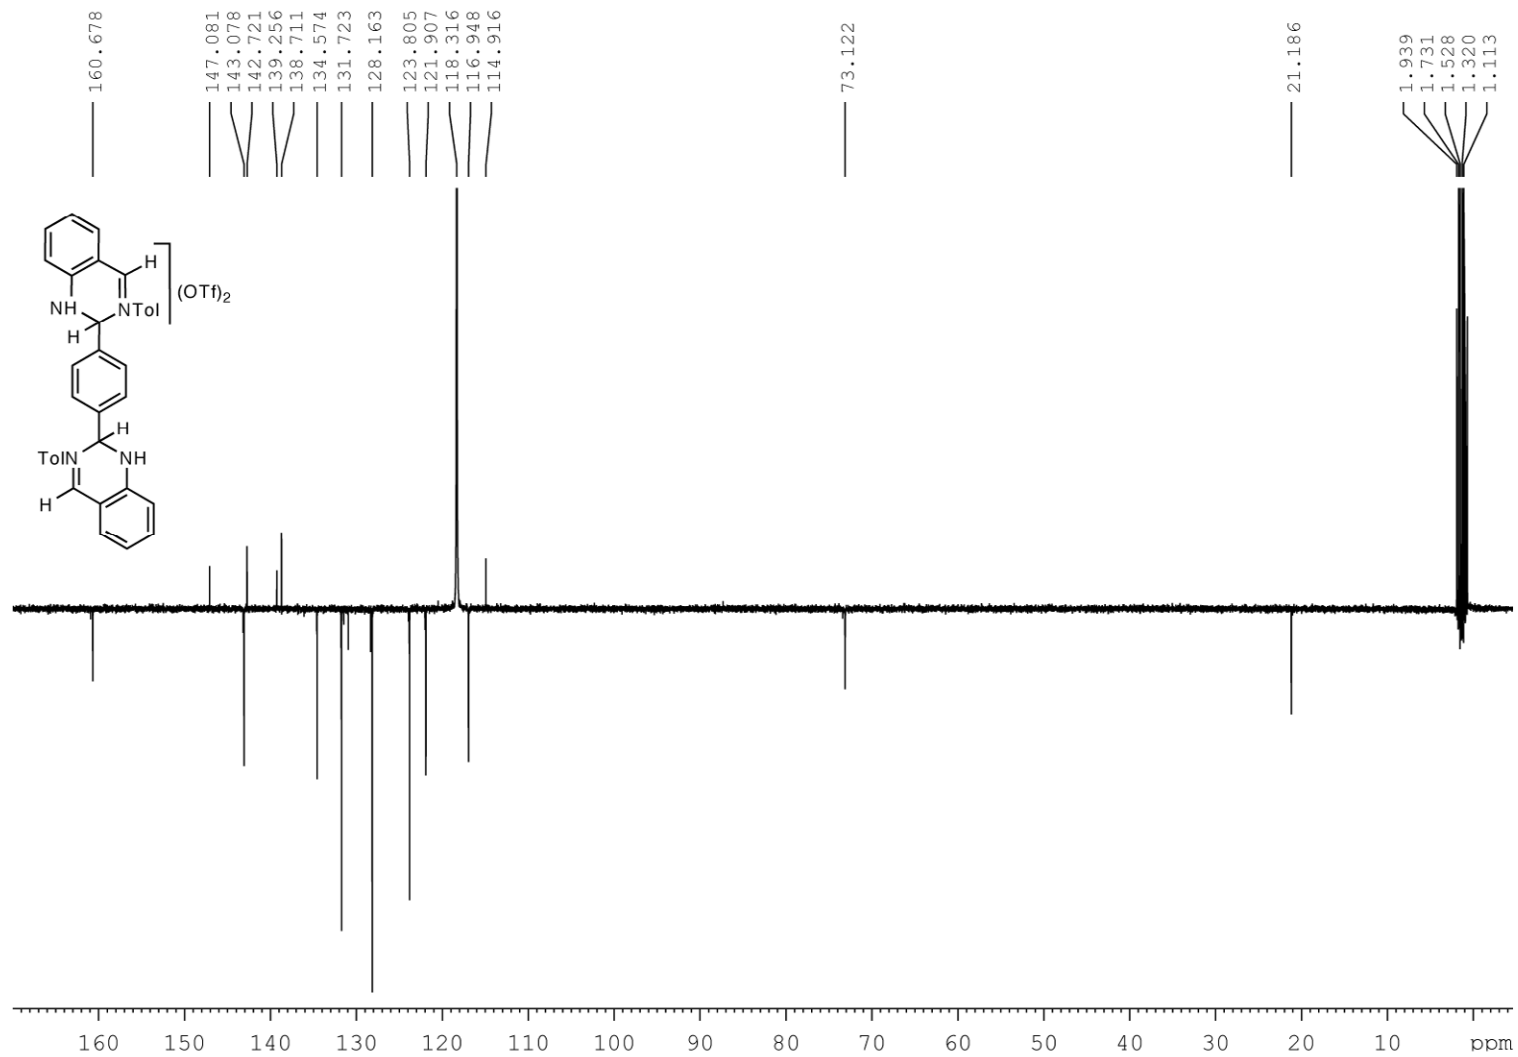

$^{13}\text{C}\{^1\text{H}\}$  NMR APT spectra of **5b** (150.9 MHz,  $\text{CD}_3\text{CN}$ ,  $-10^\circ\text{C}$ , TMS).

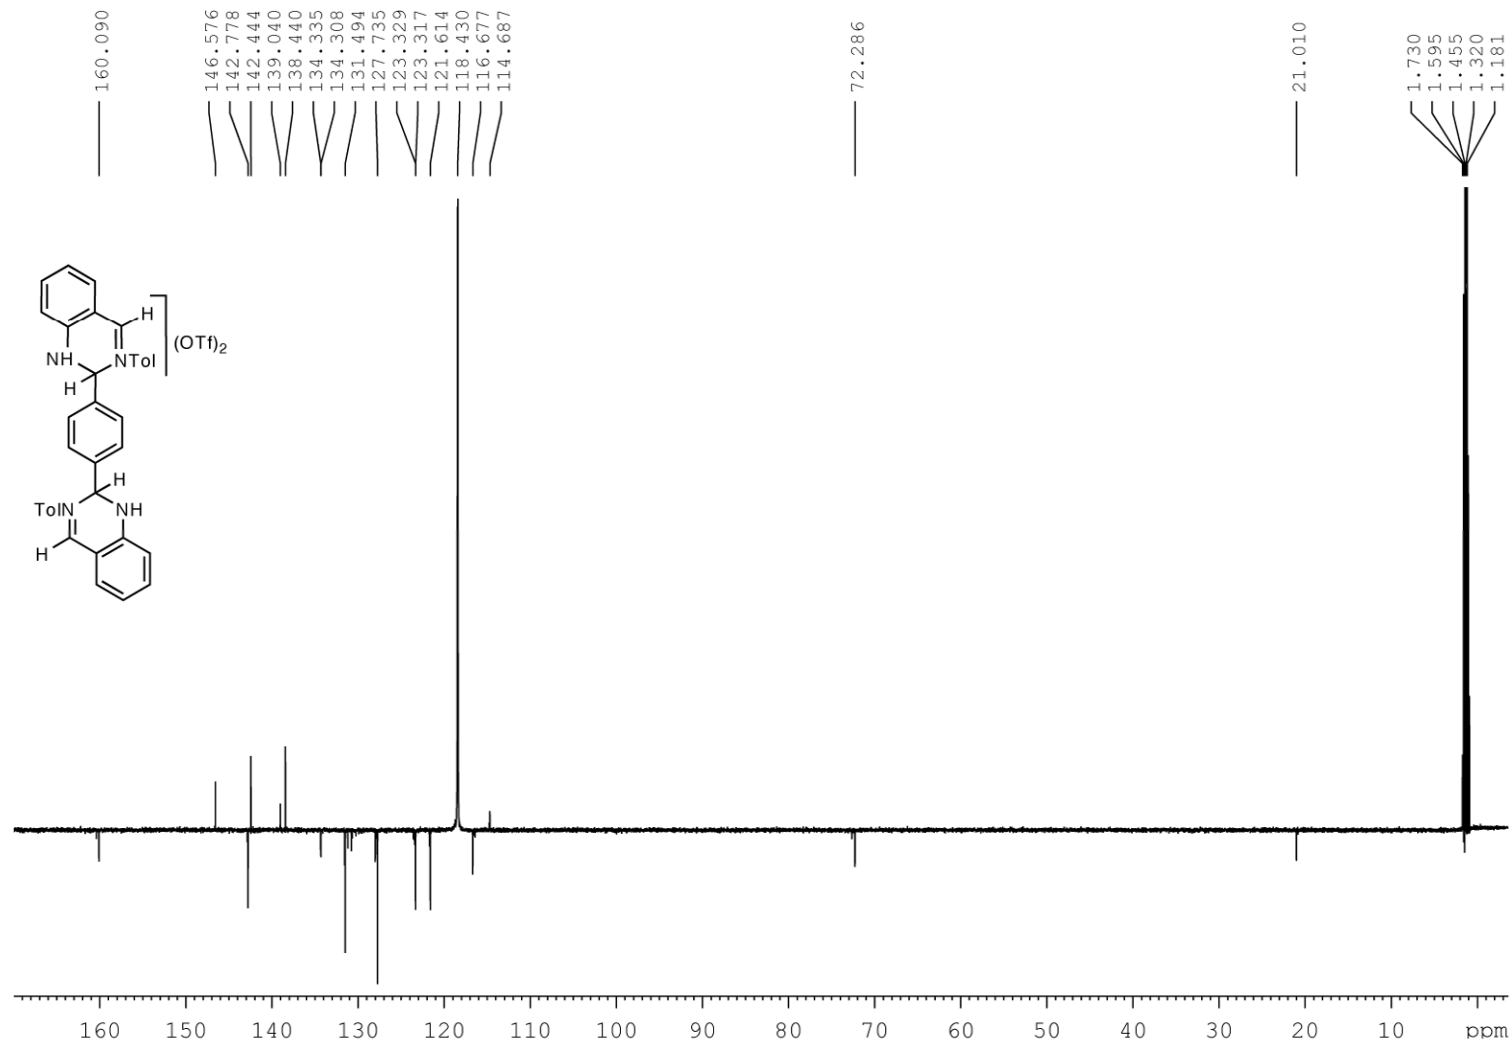

$^1\text{H}$  NMR spectra of **5d**·0.5H<sub>2</sub>O (400 MHz, CD<sub>3</sub>CN, 25 °C, TMS).

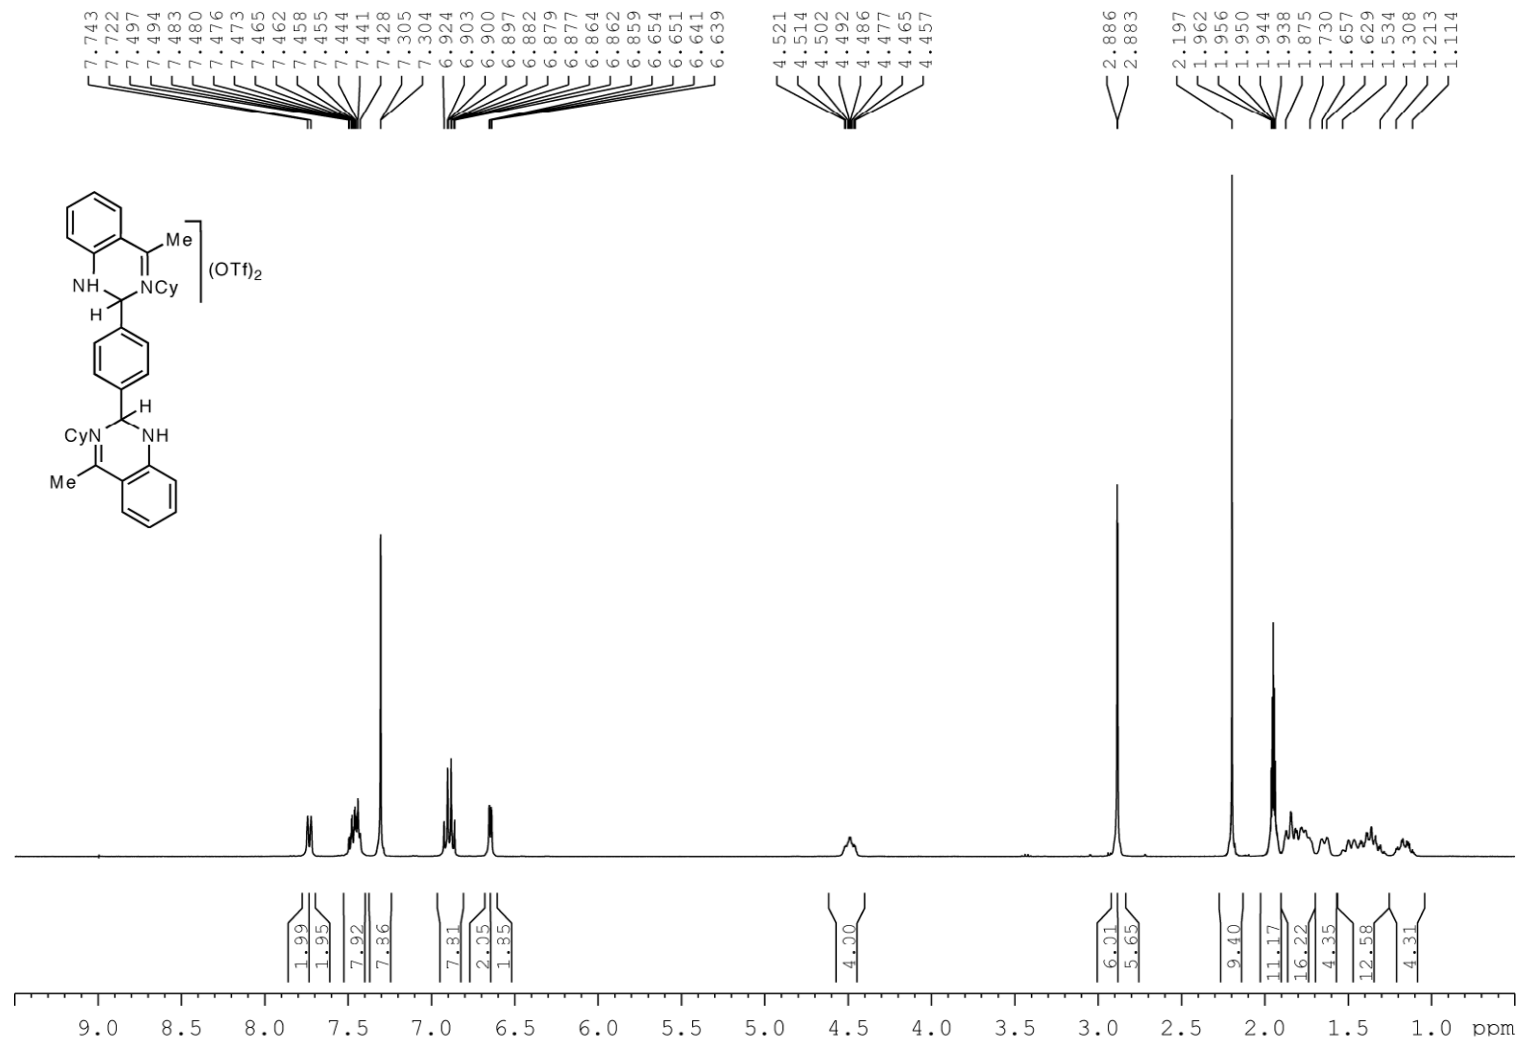



$^1\text{H}$  NMR spectra of **5d**·0.5H<sub>2</sub>O (600 MHz, CD<sub>3</sub>CN, 25 °C, TMS).

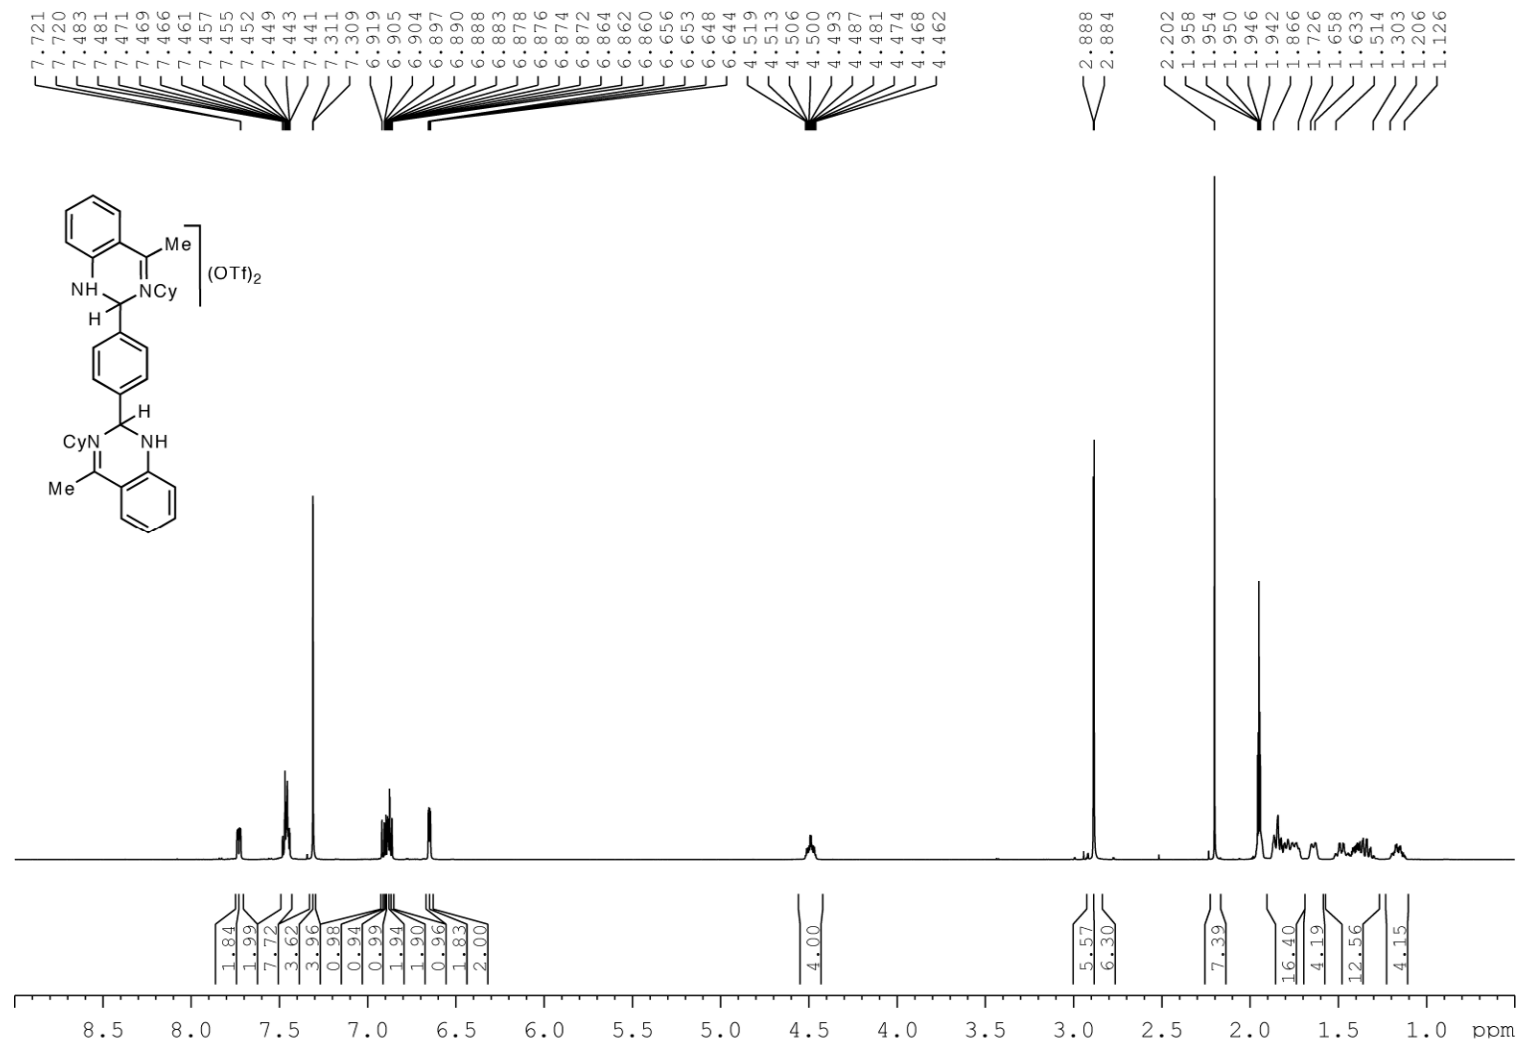

$^{13}\text{C}\{^1\text{H}\}$  NMR APT spectra of **5d** (100.8 MHz,  $\text{CD}_3\text{CN}$ , 25 °C, TMS).

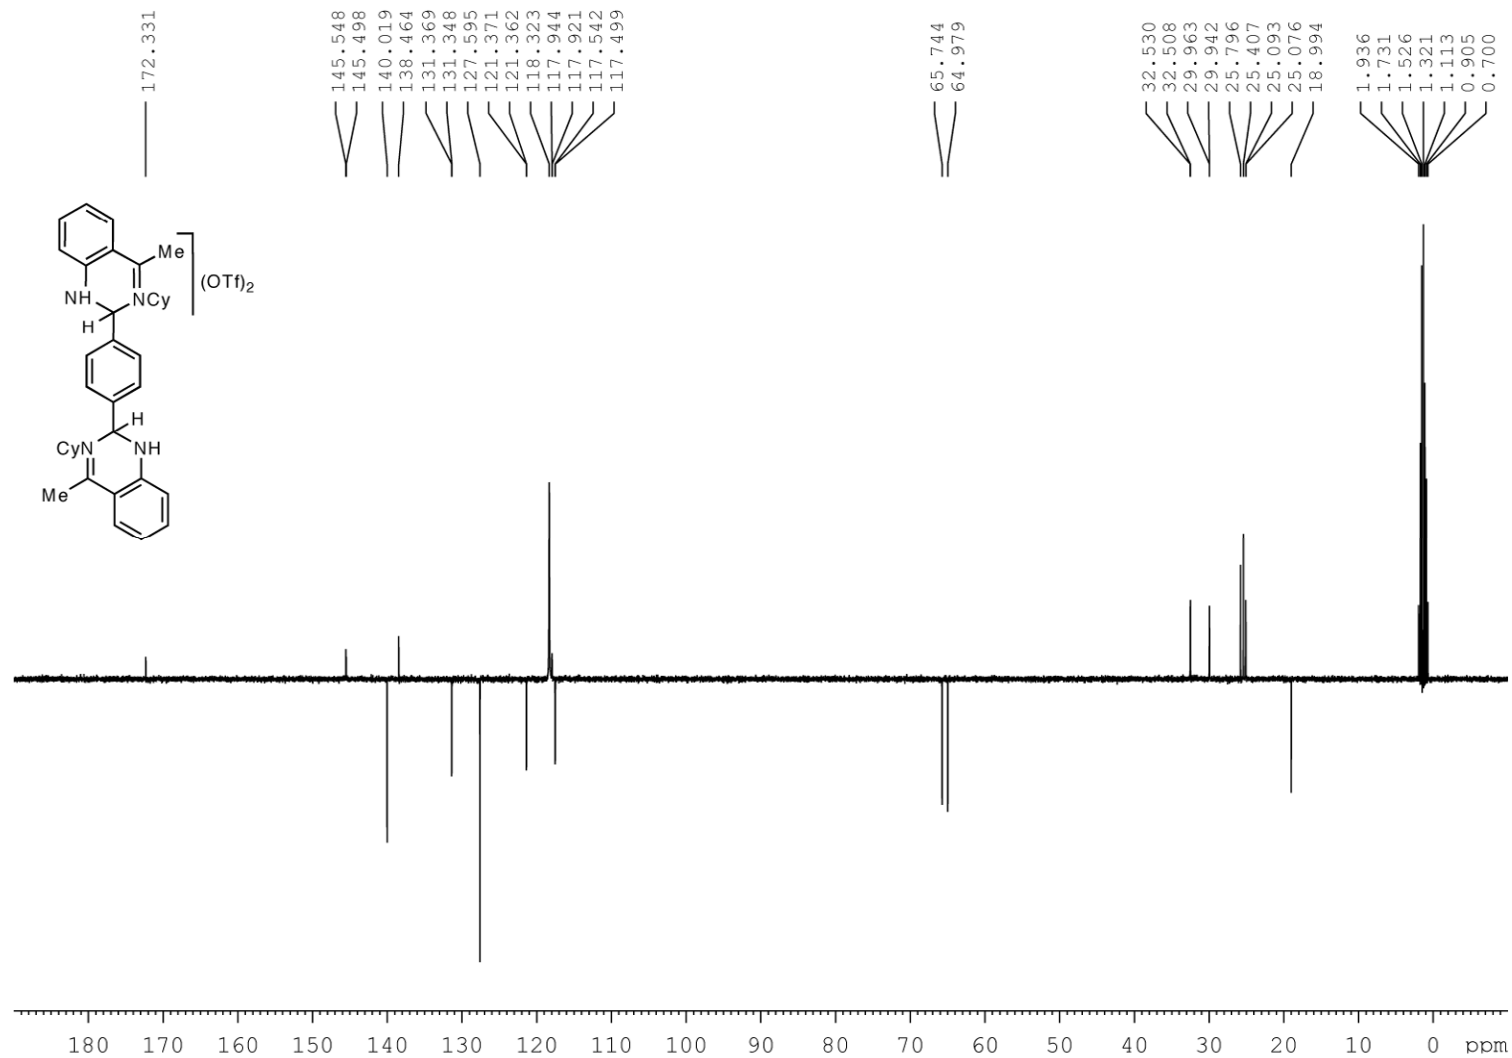

$^{13}\text{C}\{^1\text{H}\}$  NMR spectra of **5d** (150.9 MHz,  $\text{CD}_3\text{CN}$ , 25 °C, TMS).

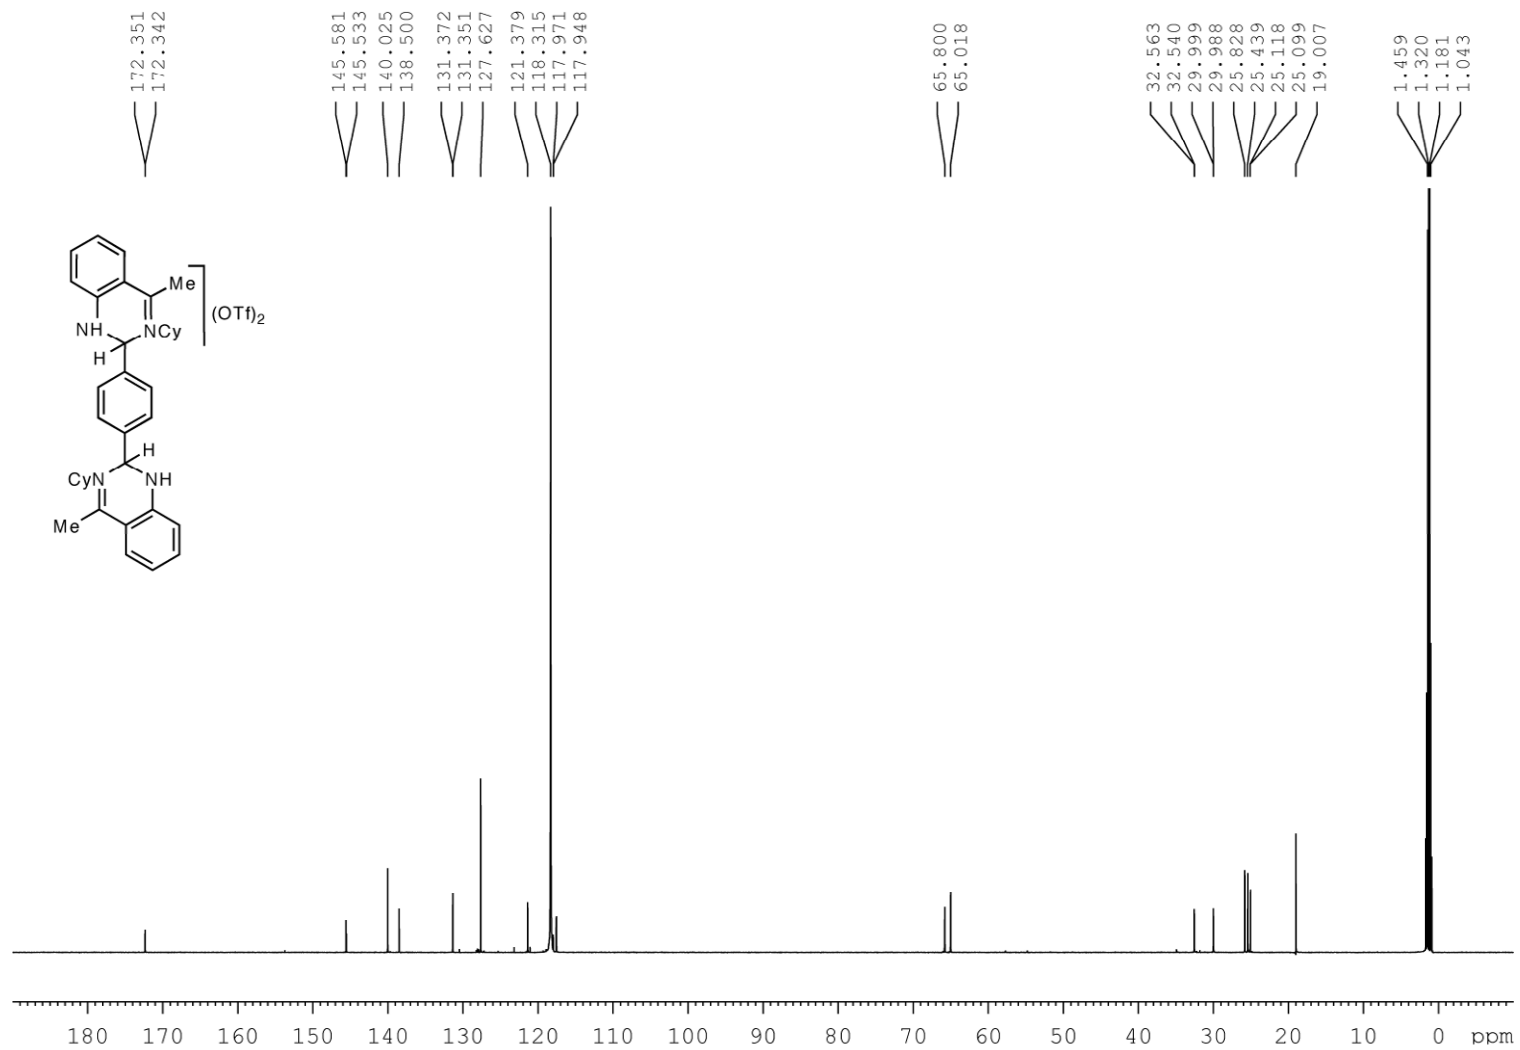

$^1\text{H}$  NMR spectra of **6d**·2H<sub>2</sub>O (600 MHz, CD<sub>2</sub>Cl<sub>2</sub>, 25 °C, TMS).

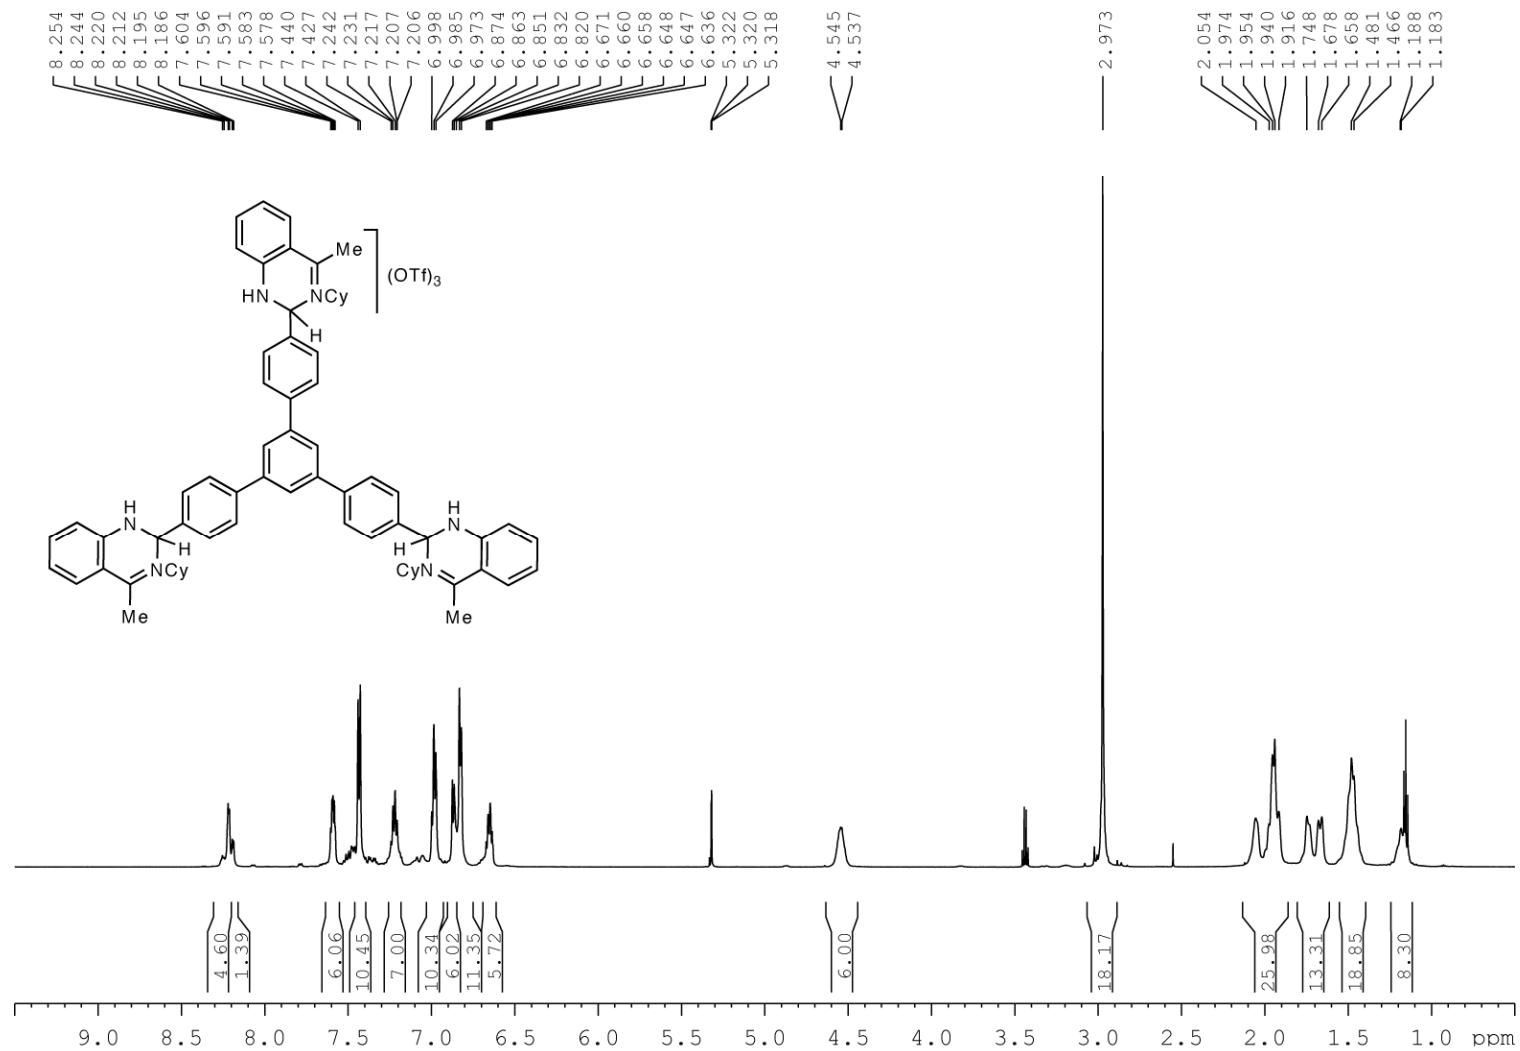

$^1\text{H}$  NMR spectra of **6d**·2H<sub>2</sub>O (600 MHz, CD<sub>2</sub>Cl<sub>2</sub>, -10 °C, TMS).

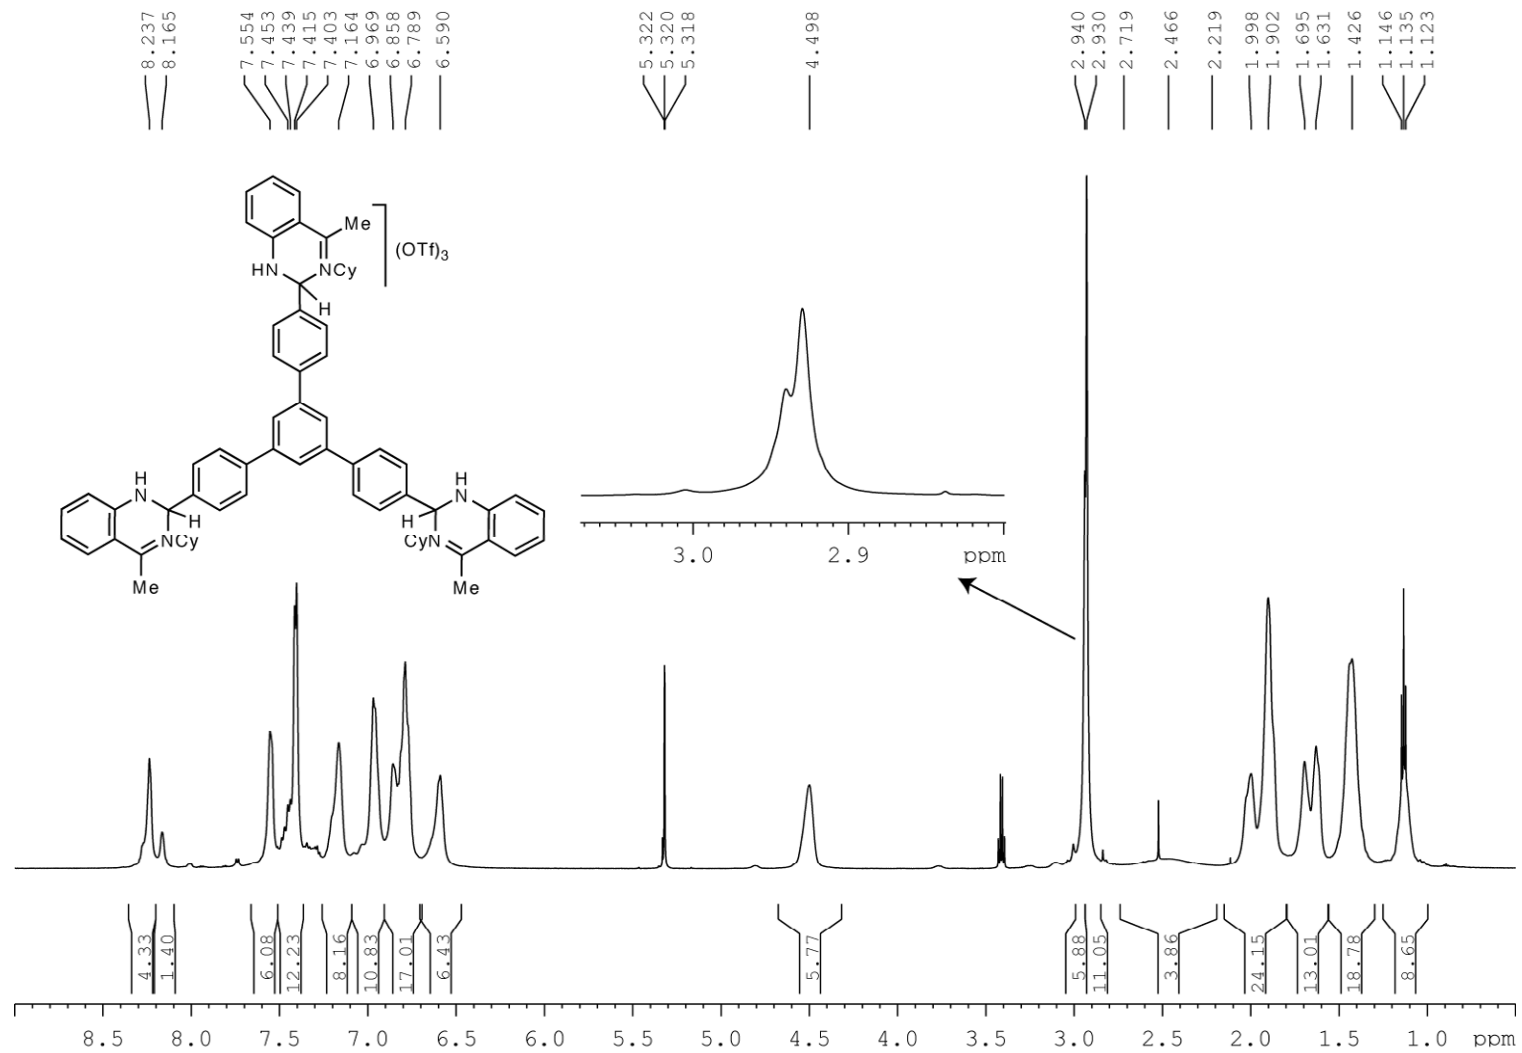

$^{13}\text{C}\{^1\text{H}\}$  NMR APT spectra of **6d** (100.8 MHz,  $\text{CD}_2\text{Cl}_2$ , 25 °C, TMS).

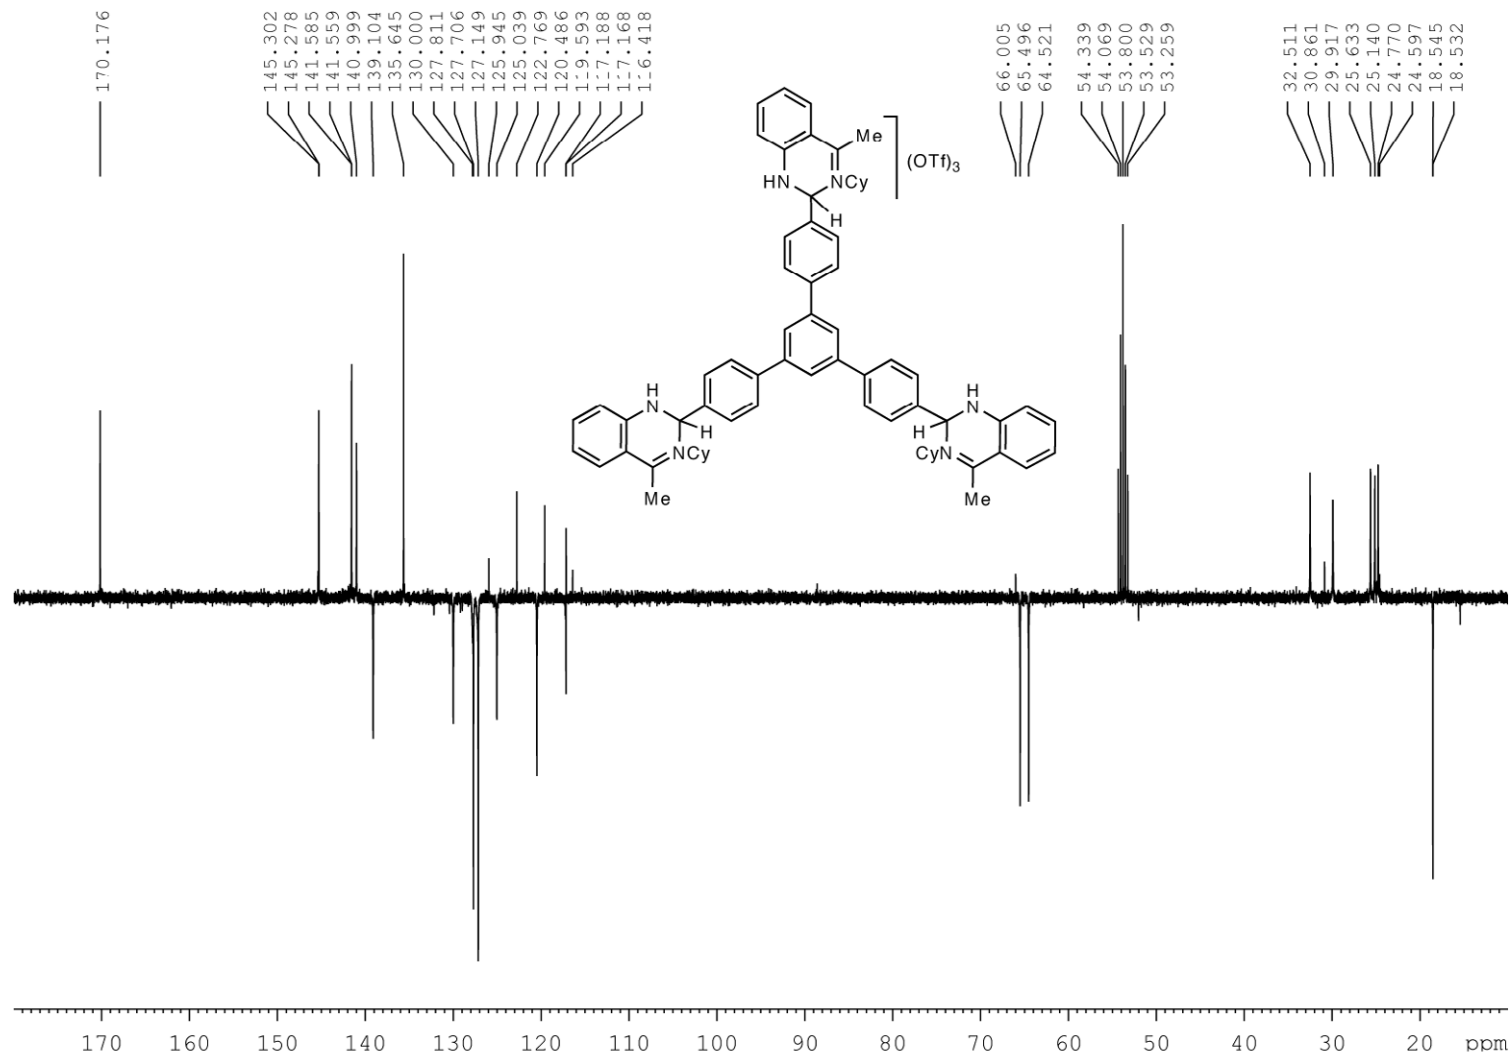

$^{13}\text{C}\{^1\text{H}\}$  NMR APT spectra of **6d** (150.9 MHz,  $\text{CD}_2\text{Cl}_2$ ,  $-10\text{ }^\circ\text{C}$ , TMS).

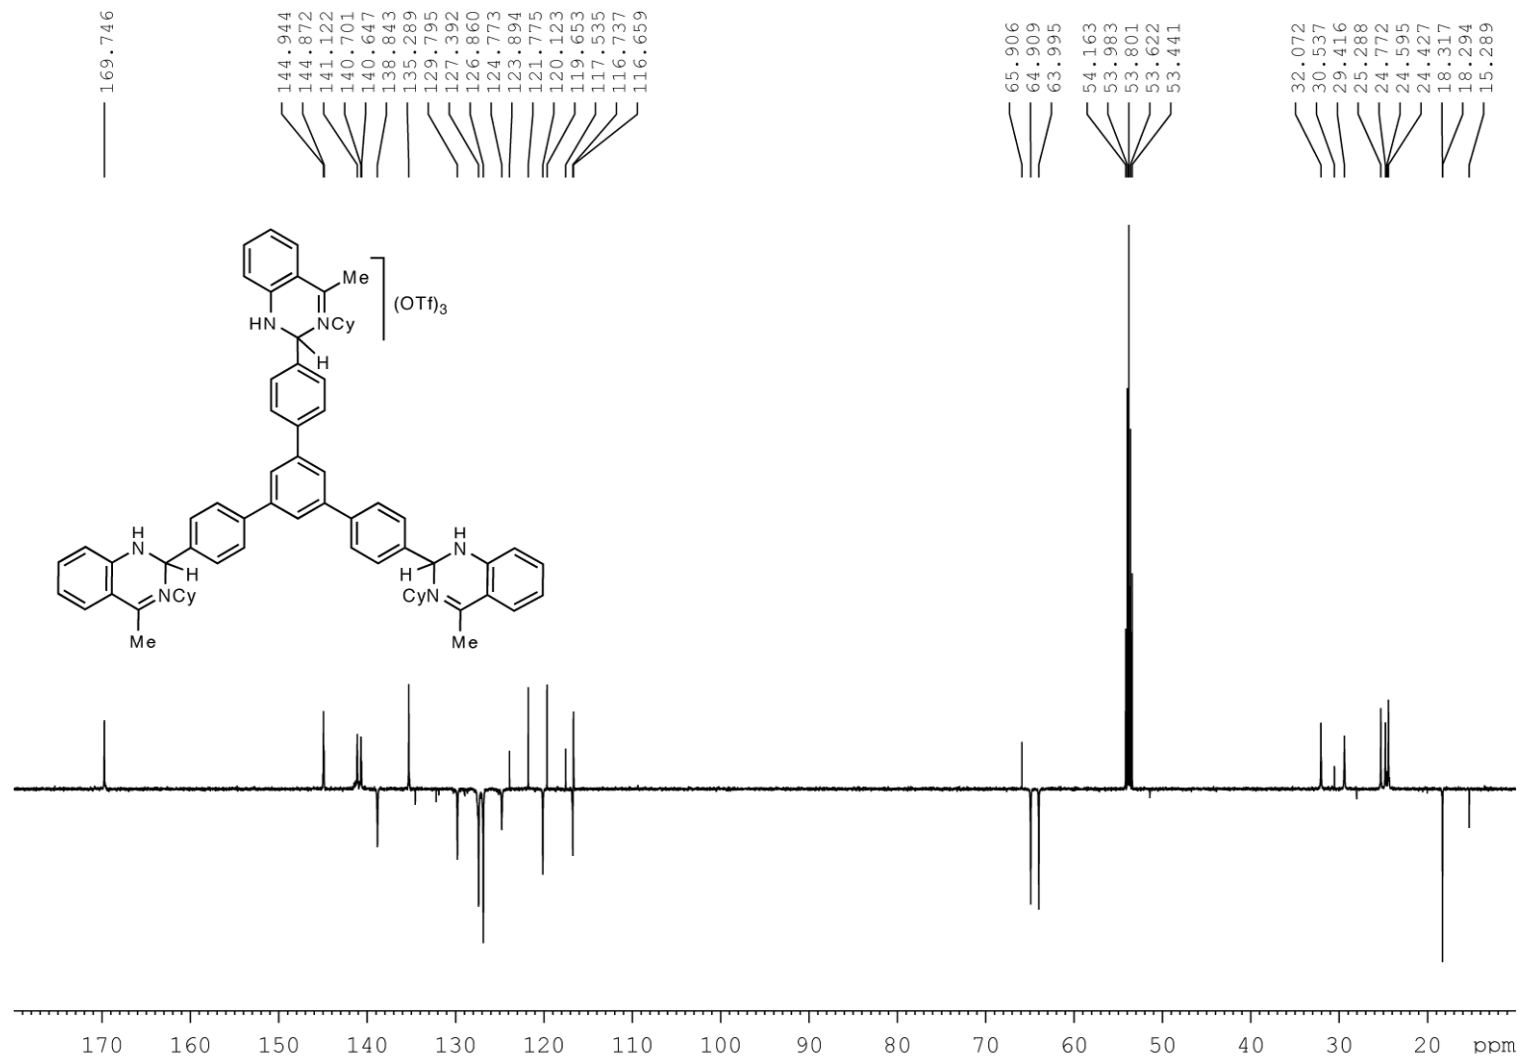

$^1\text{H}$  NMR spectra of *E*-7d2·0.2H<sub>2</sub>O (400 MHz, CDCl<sub>3</sub>, 25 °C, TMS).

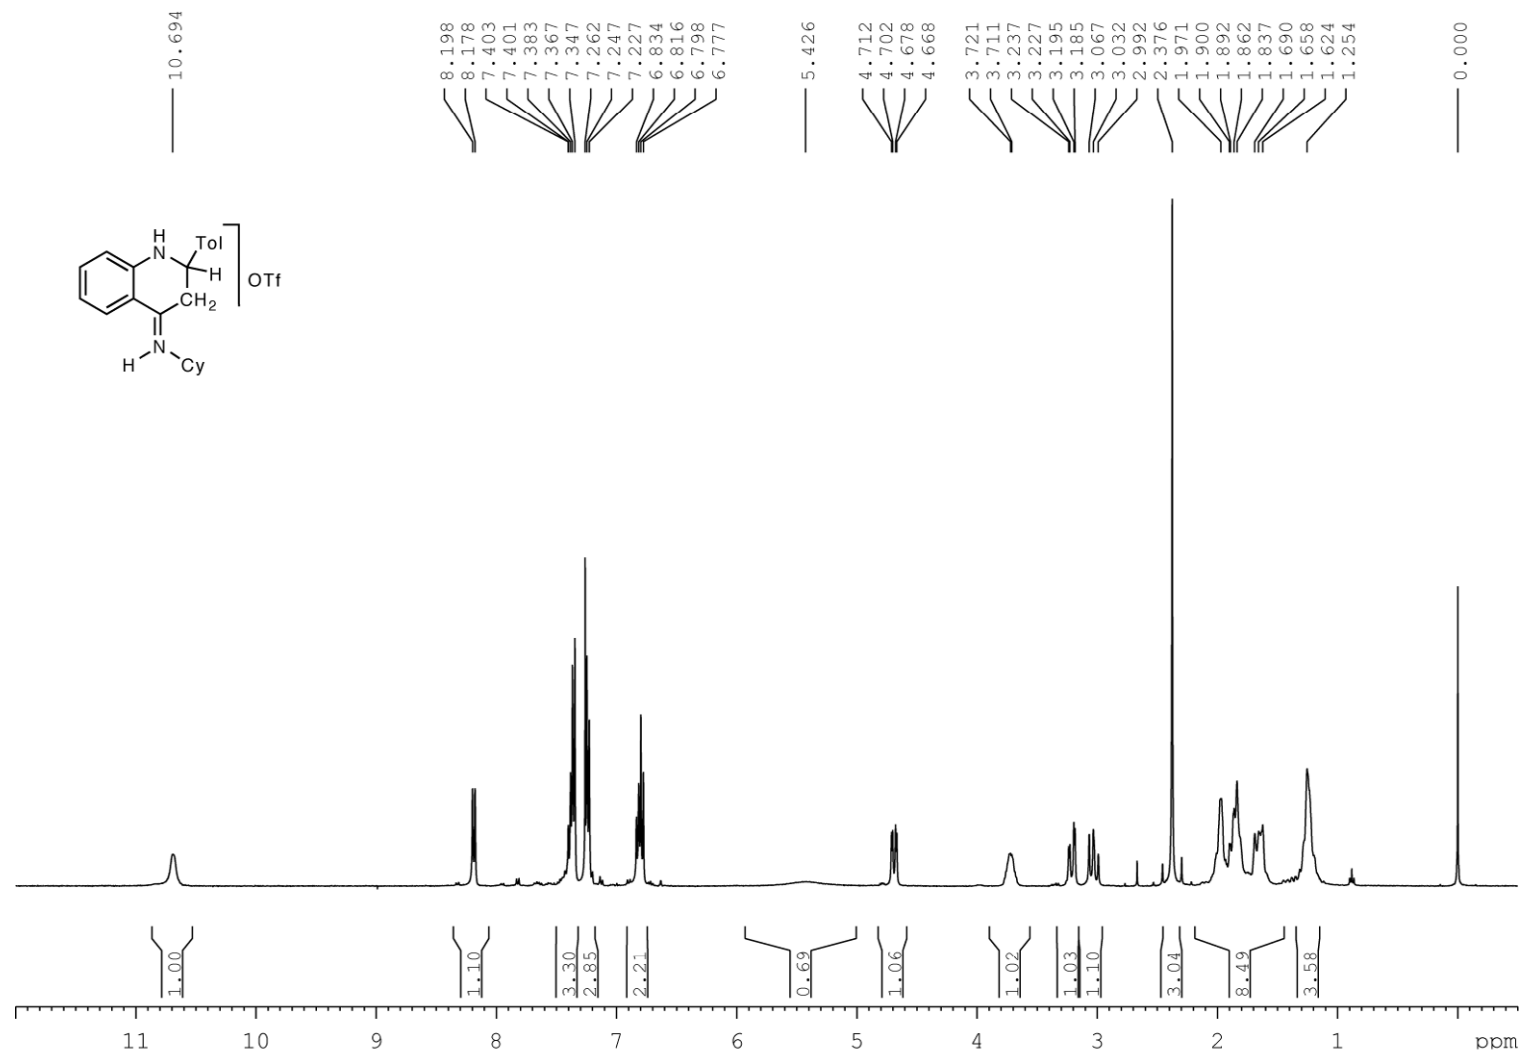



$^{13}\text{C}\{^1\text{H}\}$  NMR APT spectra of **E-7d2** (100.8 MHz,  $\text{CD}_2\text{Cl}_2$ , 25 °C, TMS).

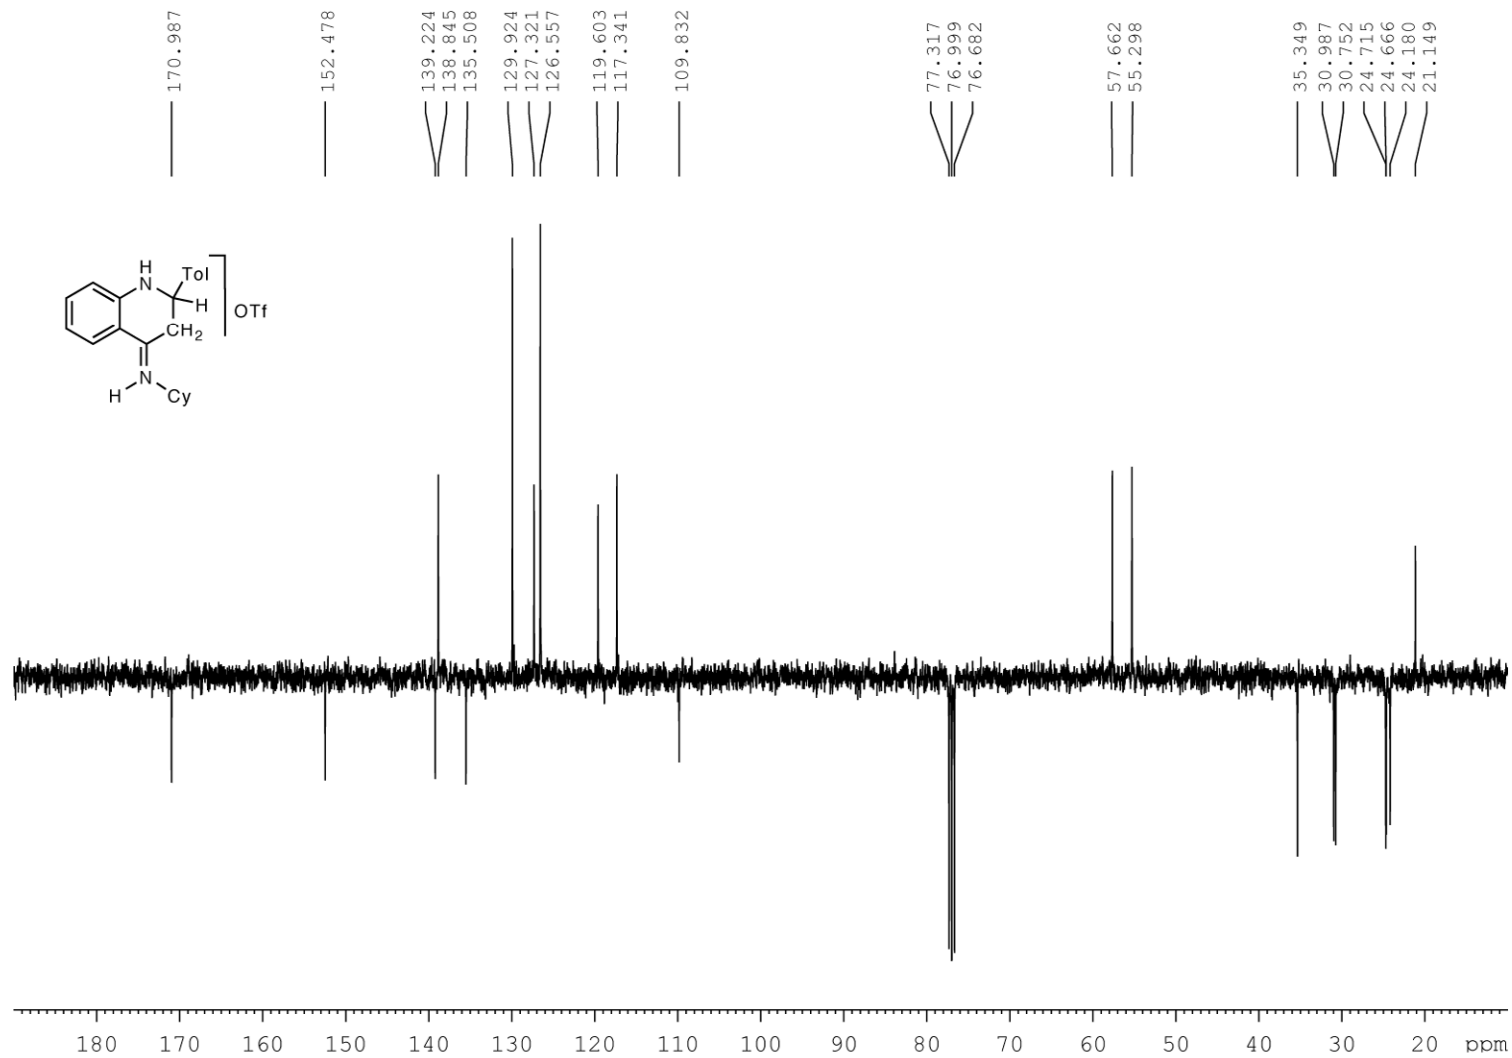

$^1\text{H}$  NMR spectra of *E-7d5*·0.5H<sub>2</sub>O (400 MHz, CDCl<sub>3</sub>, 25 °C, TMS).

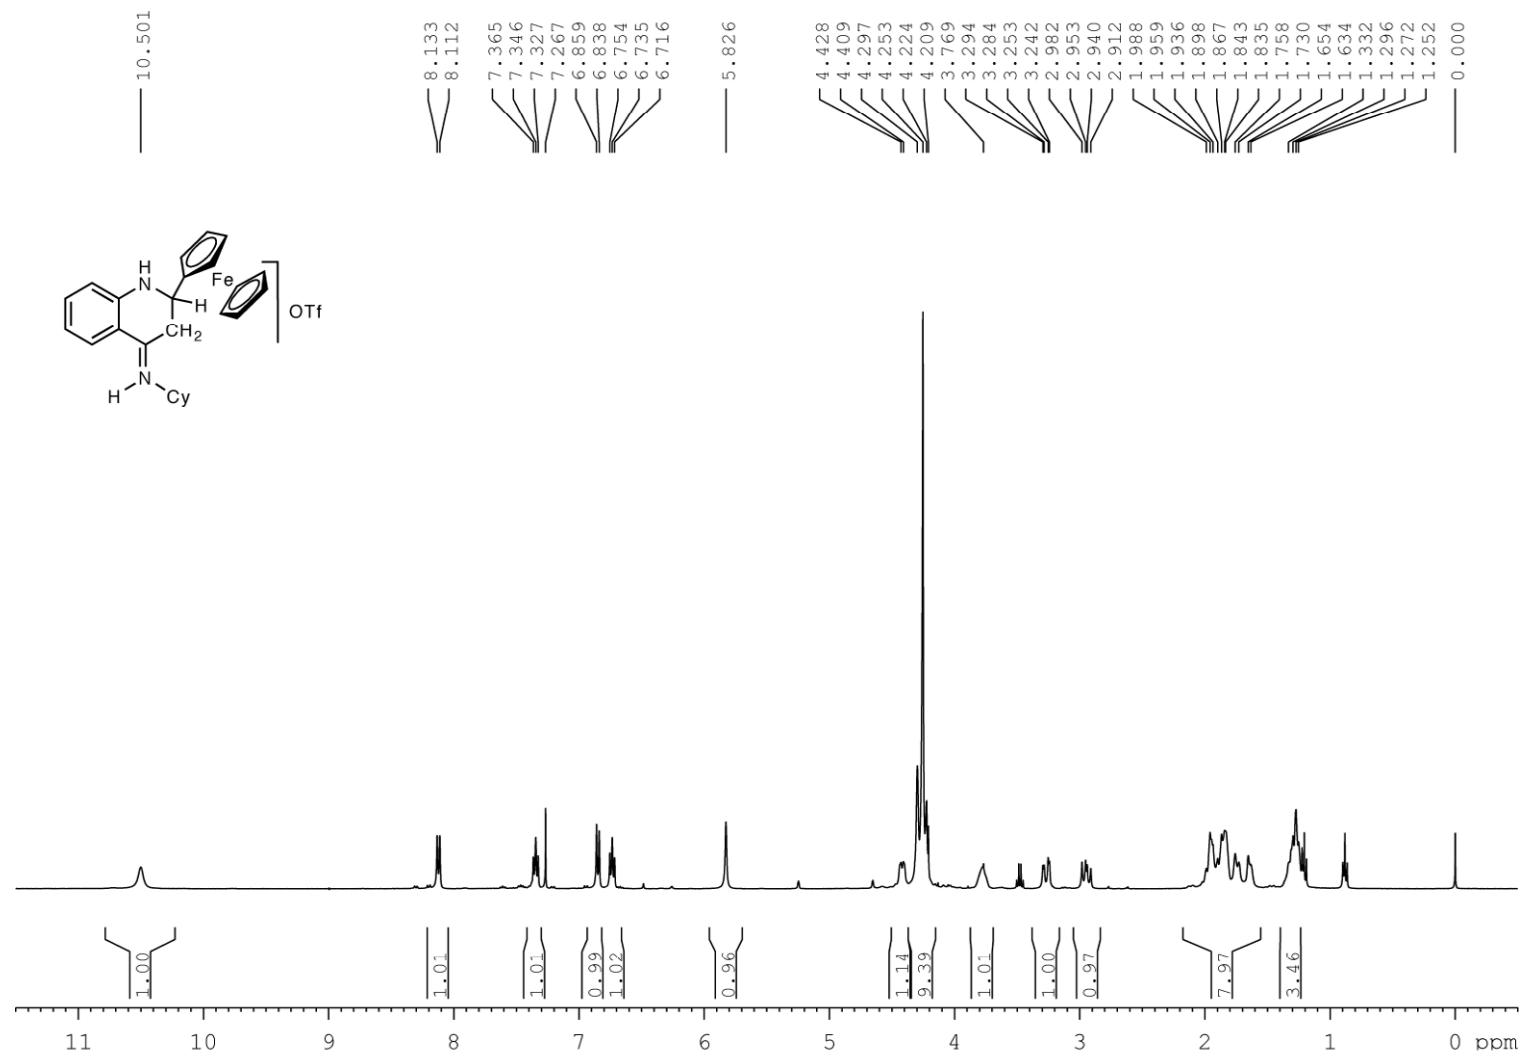

$^{13}\text{C}\{^1\text{H}\}$  NMR APT spectra of **E-7d5** (100.8 MHz,  $\text{CD}_2\text{Cl}_2$ , 25 °C, TMS).

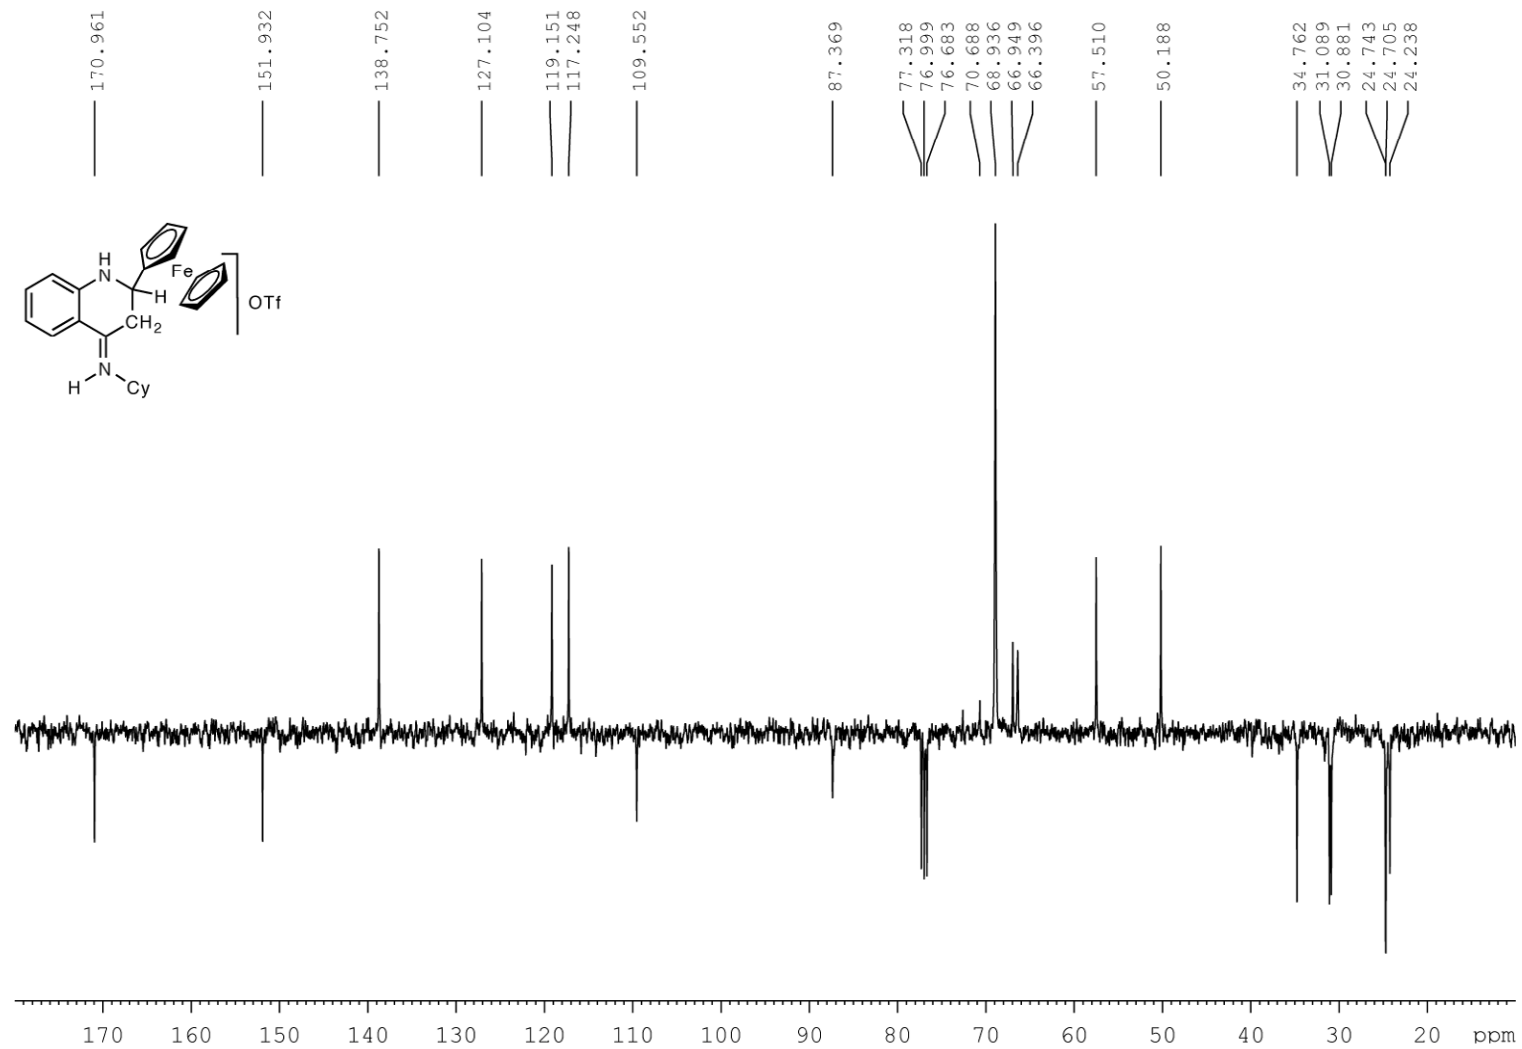

$^1\text{H}$  NMR spectra of *E-7e2*·0.5H<sub>2</sub>O (400 MHz, CDCl<sub>3</sub>, 25 °C, TMS).

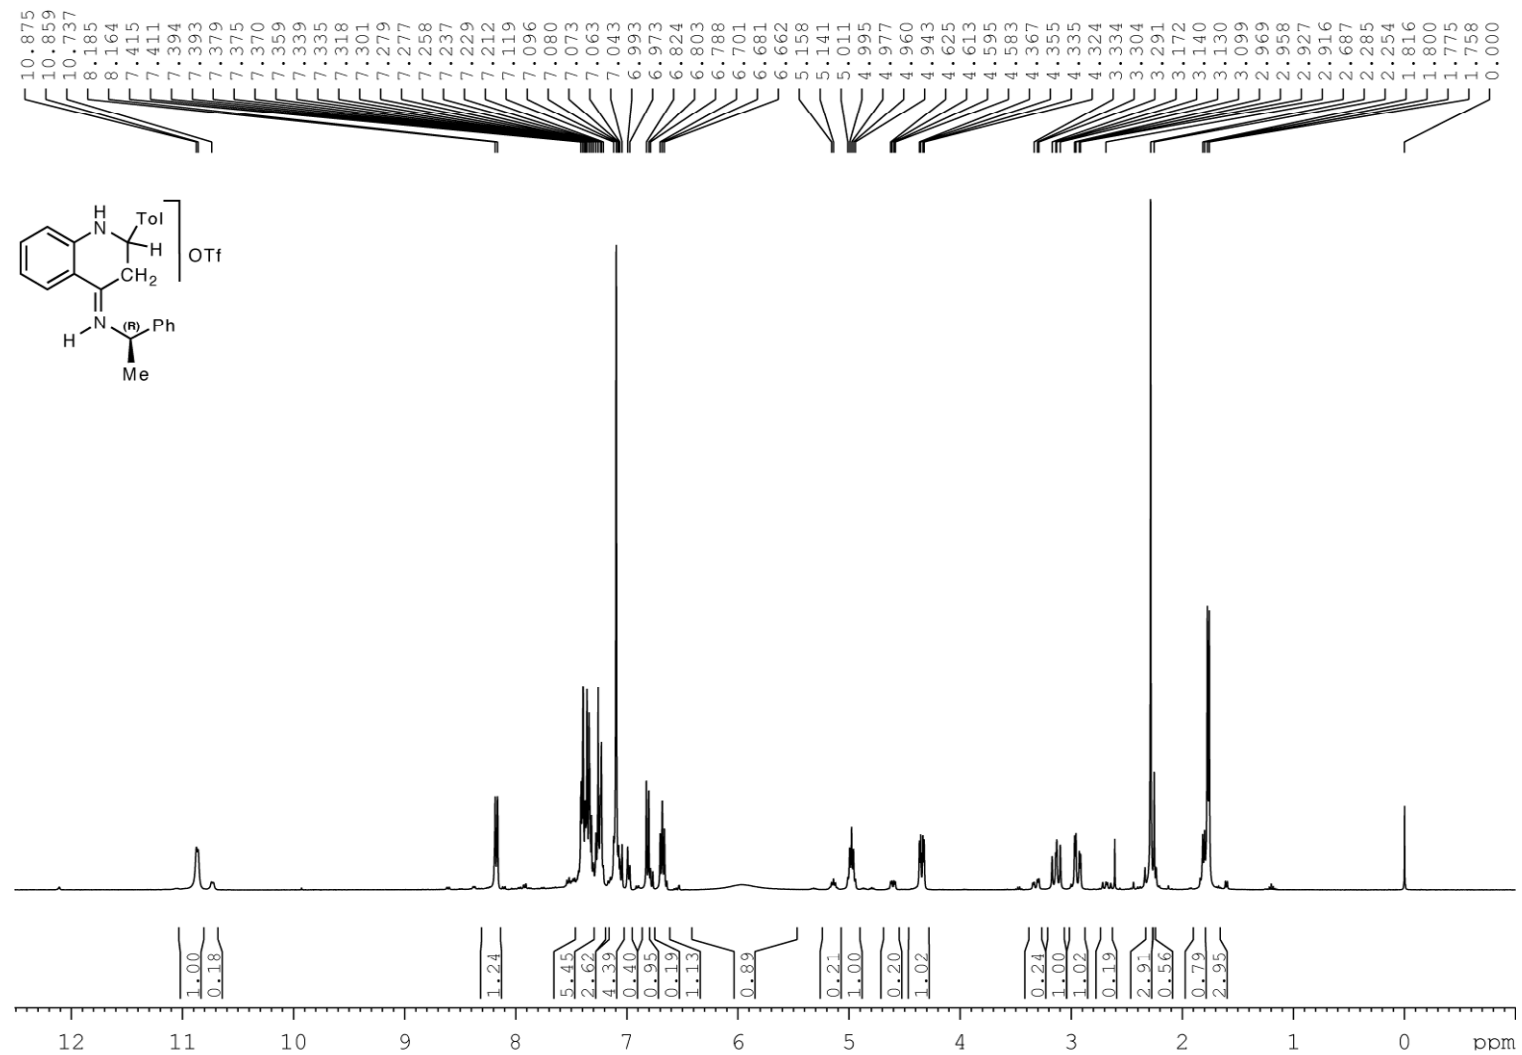

$^{13}\text{C}\{^1\text{H}\}$  NMR APT spectra of **E-7e2** (100.8 MHz,  $\text{CD}_2\text{Cl}_2$ , 25 °C, TMS).

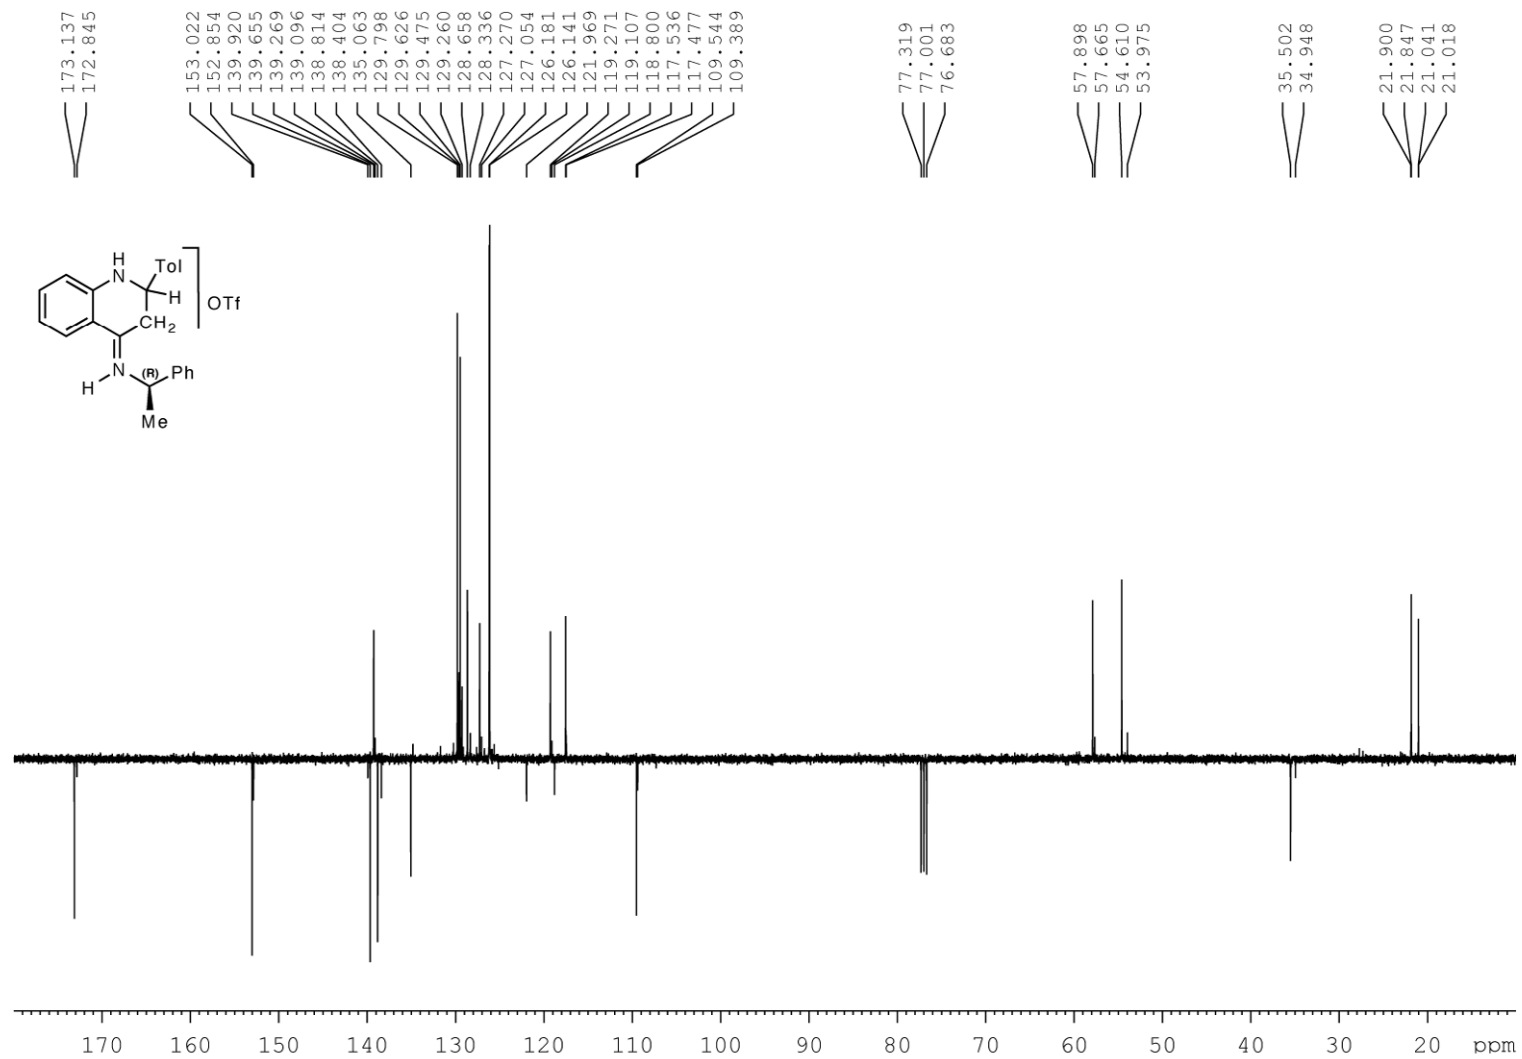

**Experimental details of the X-ray Crystallographic studies.** Compounds **3a2**·CHCl<sub>3</sub>, **3b3**, **3d4** and **7d2** were measured on a Bruker Smart APEX diffractometer. **6d**·2CHCl<sub>3</sub>·CH<sub>2</sub>Cl<sub>2</sub> was measured on a Oxford Diffraction Xcalibur Nova diffractometer. Data were collected using monochromated Mo-K $\alpha$  radiation with the Bruker diffractometer and monochromated Cu-K $\alpha$  with the Oxford diffractometer in  $\omega$  scan mode. Absorption corrections were applied on the basis of multi-scans (Program SADABS for the compounds **3a2**·CHCl<sub>3</sub>, **3b3**, **3d4** and **7d2** and CrysAlisPro for **6d**·2CHCl<sub>3</sub>·CH<sub>2</sub>Cl<sub>2</sub>). All structures were refined anisotropically on  $F^2$ . The NH hydrogens were refined freely (with DFIX for compounds **3a2** and **7d2** and with SADI for compound **6d**), the methyl groups were refined using rigid groups (AFIX 137), and the other hydrogens were refined using a riding model. *Special features and exceptions:* Complex **3b3**: The triflate anion is disordered over two positions, 58:42%. Complexes **6d**·2CHCl<sub>3</sub>·CH<sub>2</sub>Cl<sub>2</sub>: C(8), C(8') and C(8'') are chiral and, in the refined molecule, they all adopt the same S configuration. Refinement of the solvent sites proved difficult. One chloroform (at C82) is well-ordered. The molecules at C81 and C83 were interpreted as disordered dichloromethane and chloroform respectively. A system of restraints was used to improve stability of refinement, but the results are not entirely satisfactory (see e.g. U values). However, we prefer this model to the use of SQUEEZE. The triflates are all well-ordered. Complex **7d2**: The chloroform solvent is disordered over two positions, ca 65:35%.

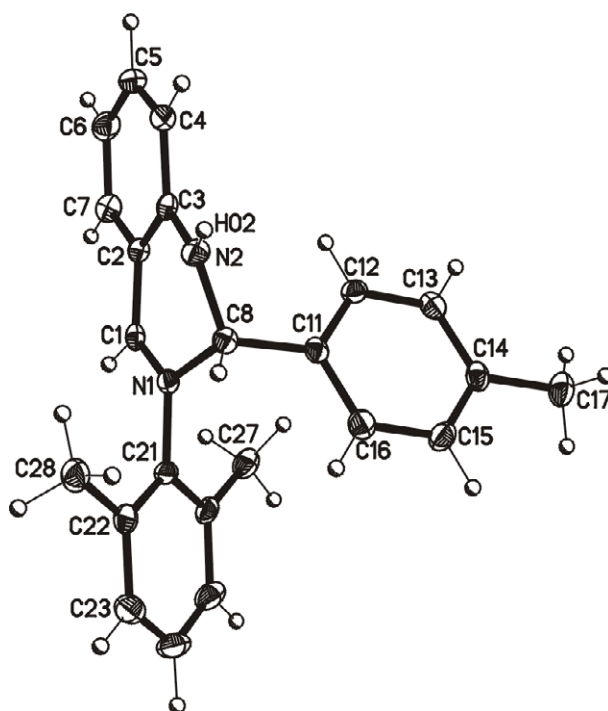

Table 1. Crystal data and structure refinement of **3a2**.

|                                   |                                                                                                |                |
|-----------------------------------|------------------------------------------------------------------------------------------------|----------------|
| Identification code               | ajf49rbs                                                                                       |                |
| Empirical formula                 | C <sub>25</sub> H <sub>24</sub> Cl <sub>3</sub> F <sub>3</sub> N <sub>2</sub> O <sub>3</sub> S |                |
| Formula weight                    | 595.87                                                                                         |                |
| Temperature                       | 100(2) K                                                                                       |                |
| Wavelength                        | 0.71073 Å                                                                                      |                |
| Crystal system                    | Monoclinic                                                                                     |                |
| Space group                       | P 2(1)/c                                                                                       |                |
| Unit cell dimensions              | a = 10.8646(11) Å                                                                              | α = 90°        |
|                                   | b = 12.0601(11) Å                                                                              | β = 94.238(2)° |
|                                   | c = 20.4915(18) Å                                                                              | γ = 90°        |
| Volume                            | 2677.6(4) Å <sup>3</sup>                                                                       |                |
| Z                                 | 4                                                                                              |                |
| Density (calculated)              | 1.478 Mg/m <sup>3</sup>                                                                        |                |
| Absorption coefficient            | 0.472 mm <sup>-1</sup>                                                                         |                |
| F(000)                            | 1224                                                                                           |                |
| Crystal size                      | 0.15 x 0.12 x 0.06 mm <sup>3</sup>                                                             |                |
| Theta range for data collection   | 1.88 to 28.73°                                                                                 |                |
| Index ranges                      | -14 ≤ h ≤ 14, -15 ≤ k ≤ 15, -27 ≤ l ≤ 27                                                       |                |
| Reflections collected             | 32587                                                                                          |                |
| Independent reflections           | 6510 [R(int) = 0.0460]                                                                         |                |
| Completeness to theta = 26.00°    | 99.9 %                                                                                         |                |
| Absorption correction             | Semi-empirical from equivalents                                                                |                |
| Max. and min. transmission        | 0.9722 and 0.8680                                                                              |                |
| Refinement method                 | Full-matrix least-squares on F <sup>2</sup>                                                    |                |
| Data / restraints / parameters    | 6510 / 0 / 341                                                                                 |                |
| Goodness-of-fit on F <sup>2</sup> | 1.061                                                                                          |                |
| Final R indices [I > 2σ(I)]       | R1 = 0.0490, wR2 = 0.1024                                                                      |                |
| R indices (all data)              | R1 = 0.0666, wR2 = 0.1093                                                                      |                |
| Largest diff. peak and hole       | 0.513 and -0.298 e.Å <sup>-3</sup>                                                             |                |

**3a2.** Table 2. Atomic coordinates ( $\times 10^4$ ) and equivalent isotropic displacement parameters ( $\text{\AA}^2 \times 10^3$ ). U(eq) is defined as one third of the trace of the orthogonalized Uij tensor.

|       | x           | y          | z          | U(eq)   |
|-------|-------------|------------|------------|---------|
| C(1)  | -477.4(18)  | 3817.5(16) | 2185.0(9)  | 15.4(4) |
| N(1)  | 599.2(15)   | 4242.3(13) | 2087.6(8)  | 14.8(3) |
| C(2)  | -1286.7(18) | 4297.2(16) | 2616.2(9)  | 16.1(4) |
| C(3)  | -805.9(18)  | 5154.3(17) | 3028.7(9)  | 16.3(4) |
| C(4)  | -1528(2)    | 5566.5(18) | 3512.8(10) | 20.7(4) |
| C(5)  | -2684(2)    | 5141.1(19) | 3566.4(11) | 25.0(5) |
| C(6)  | -3172(2)    | 4293.5(19) | 3160.5(11) | 24.9(5) |
| C(7)  | -2476.1(19) | 3864.6(18) | 2689.0(10) | 20.3(4) |
| C(8)  | 962.1(18)   | 5365.7(16) | 2362.5(9)  | 15.5(4) |
| N(2)  | 363.0(17)   | 5512.3(15) | 2960.8(8)  | 17.8(4) |
| C(11) | 688.7(18)   | 6239.8(16) | 1842.1(9)  | 15.6(4) |
| C(12) | -433.2(19)  | 6795.8(17) | 1766.1(10) | 17.4(4) |
| C(13) | -644(2)     | 7564.2(17) | 1262.4(10) | 19.4(4) |
| C(14) | 253(2)      | 7798.0(17) | 833.4(10)  | 18.8(4) |
| C(15) | 1372(2)     | 7239.2(18) | 915.8(10)  | 21.6(4) |
| C(16) | 1590.7(19)  | 6471.2(17) | 1412.5(10) | 20.5(4) |
| C(17) | 32(2)       | 8650.1(18) | 299.4(11)  | 25.3(5) |
| C(21) | 1420.1(19)  | 3765.5(16) | 1635.4(10) | 16.7(4) |
| C(22) | 2586(2)     | 3409.8(17) | 1876.4(11) | 20.5(4) |
| C(23) | 3385(2)     | 3028.4(18) | 1425.8(12) | 25.8(5) |
| C(24) | 3034(2)     | 3023.8(19) | 765.7(12)  | 29.7(5) |
| C(25) | 1863(2)     | 3370.1(18) | 538.6(11)  | 25.9(5) |
| C(26) | 1018(2)     | 3747.5(17) | 967.2(10)  | 19.6(4) |
| C(27) | -242(2)     | 4137.7(18) | 709.2(10)  | 23.0(5) |
| C(28) | 3007(2)     | 3426.2(19) | 2595.1(11) | 23.9(5) |
| C(98) | 5353(2)     | 5401(2)    | 1099.7(11) | 24.2(5) |
| Cl(1) | 6916.8(5)   | 5738.6(6)  | 1056.6(3)  | 39.3(2) |
| Cl(2) | 4886.1(5)   | 5724.2(5)  | 1885.4(3)  | 28.3(1) |
| Cl(3) | 4436.9(6)   | 6115.5(6)  | 492.0(3)   | 34.9(2) |
| C(99) | 6413(2)     | 762(2)     | 618.4(12)  | 32.6(6) |
| F(1)  | 5203.2(15)  | 609.8(17)  | 601.4(8)   | 60.7(6) |
| F(2)  | 6956.3(19)  | -195.4(13) | 781.0(10)  | 61.8(5) |
| F(3)  | 6703.0(15)  | 1013.6(15) | 18.0(7)    | 48.9(5) |
| S(1)  | 6892.4(5)   | 1840.7(4)  | 1199.9(2)  | 19.0(1) |
| O(1)  | 6528.4(16)  | 1417.3(15) | 1812.1(8)  | 31.4(4) |
| O(2)  | 8219.1(13)  | 1887.0(13) | 1157.2(8)  | 24.5(3) |
| O(3)  | 6250.1(15)  | 2804.4(14) | 951.7(8)   | 33.2(4) |

**3a2.** Table 3. Bond lengths [ $\text{\AA}$ ] and angles [ $^\circ$ ].

|            |          |             |          |
|------------|----------|-------------|----------|
| (1)-N(1)   | 1.306(3) | C(11)-C(12) | 1.390(3) |
| C(1)-C(2)  | 1.416(3) | C(11)-C(16) | 1.393(3) |
| N(1)-C(21) | 1.451(2) | C(12)-C(13) | 1.393(3) |
| N(1)-C(8)  | 1.509(2) | C(13)-C(14) | 1.388(3) |
| C(2)-C(3)  | 1.411(3) | C(14)-C(15) | 1.390(3) |
| C(2)-C(7)  | 1.412(3) | C(14)-C(17) | 1.507(3) |
| C(3)-N(2)  | 1.358(3) | C(15)-C(16) | 1.384(3) |
| C(3)-C(4)  | 1.400(3) | C(21)-C(22) | 1.393(3) |
| C(4)-C(5)  | 1.369(3) | C(21)-C(26) | 1.406(3) |
| C(5)-C(6)  | 1.398(3) | C(22)-C(23) | 1.391(3) |
| C(6)-C(7)  | 1.371(3) | C(22)-C(28) | 1.510(3) |
| C(8)-N(2)  | 1.441(3) | C(23)-C(24) | 1.378(3) |
| C(8)-C(11) | 1.513(3) | C(24)-C(25) | 1.386(3) |



|                   |            |                   |            |
|-------------------|------------|-------------------|------------|
| C(25)-C(26)       | 1.393(3)   | C(14)-C(13)-C(12) | 121.30(19) |
| C(26)-C(27)       | 1.506(3)   | C(13)-C(14)-C(15) | 118.24(19) |
| C(98)-Cl(1)       | 1.756(2)   | C(13)-C(14)-C(17) | 121.13(19) |
| C(98)-Cl(3)       | 1.761(2)   | C(15)-C(14)-C(17) | 120.62(19) |
| C(98)-Cl(2)       | 1.767(2)   | C(16)-C(15)-C(14) | 121.01(19) |
| C(99)-F(1)        | 1.325(3)   | C(15)-C(16)-C(11) | 120.55(19) |
| C(99)-F(3)        | 1.327(3)   | C(22)-C(21)-C(26) | 123.32(19) |
| C(99)-F(2)        | 1.328(3)   | C(22)-C(21)-N(1)  | 118.78(18) |
| C(99)-S(1)        | 1.814(2)   | C(26)-C(21)-N(1)  | 117.79(18) |
| S(1)-O(3)         | 1.4297(17) | C(23)-C(22)-C(21) | 117.5(2)   |
| S(1)-O(1)         | 1.4368(16) | C(23)-C(22)-C(28) | 119.5(2)   |
| S(1)-O(2)         | 1.4516(15) | C(21)-C(22)-C(28) | 122.93(19) |
| N(1)-C(1)-C(2)    | 122.67(18) | C(24)-C(23)-C(22) | 120.8(2)   |
| C(1)-N(1)-C(21)   | 122.80(17) | C(23)-C(24)-C(25) | 120.6(2)   |
| C(1)-N(1)-C(8)    | 120.51(16) | C(24)-C(25)-C(26) | 121.2(2)   |
| C(21)-N(1)-C(8)   | 115.99(15) | C(25)-C(26)-C(21) | 116.5(2)   |
| C(3)-C(2)-C(7)    | 120.58(18) | C(25)-C(26)-C(27) | 120.3(2)   |
| C(3)-C(2)-C(1)    | 116.99(18) | C(21)-C(26)-C(27) | 123.09(18) |
| C(7)-C(2)-C(1)    | 122.05(19) | Cl(1)-C(98)-Cl(3) | 110.45(12) |
| N(2)-C(3)-C(4)    | 122.44(19) | Cl(1)-C(98)-Cl(2) | 109.79(12) |
| N(2)-C(3)-C(2)    | 118.63(18) | Cl(3)-C(98)-Cl(2) | 110.52(12) |
| C(4)-C(3)-C(2)    | 118.85(19) | F(1)-C(99)-F(3)   | 108.1(2)   |
| C(5)-C(4)-C(3)    | 119.3(2)   | F(1)-C(99)-F(2)   | 107.9(2)   |
| C(4)-C(5)-C(6)    | 122.4(2)   | F(3)-C(99)-F(2)   | 107.4(2)   |
| C(7)-C(6)-C(5)    | 119.4(2)   | F(1)-C(99)-S(1)   | 110.66(16) |
| C(6)-C(7)-C(2)    | 119.4(2)   | F(3)-C(99)-S(1)   | 111.64(17) |
| N(2)-C(8)-N(1)    | 107.81(15) | F(2)-C(99)-S(1)   | 110.98(19) |
| N(2)-C(8)-C(11)   | 115.89(17) | O(3)-S(1)-O(1)    | 116.16(10) |
| N(1)-C(8)-C(11)   | 109.28(15) | O(3)-S(1)-O(2)    | 114.08(10) |
| C(3)-N(2)-C(8)    | 122.20(17) | O(1)-S(1)-O(2)    | 113.89(10) |
| C(12)-C(11)-C(16) | 118.99(18) | O(3)-S(1)-C(99)   | 103.91(12) |
| C(12)-C(11)-C(8)  | 122.68(18) | O(1)-S(1)-C(99)   | 103.56(11) |
| C(16)-C(11)-C(8)  | 118.31(18) | O(2)-S(1)-C(99)   | 103.07(10) |
| C(11)-C(12)-C(13) | 119.91(19) |                   |            |

**3a2.** Table 4. Anisotropic displacement parameters ( $\text{\AA}^2 \times 10^3$ ). The anisotropic displacement factor exponent takes the form:  $-2\pi^2 [ h^2 a^{*2} U^{11} + \dots + 2 h k a^* b^* U^{12} ]$

|       | U <sup>11</sup> | U <sup>22</sup> | U <sup>33</sup> | U <sup>23</sup> | U <sup>13</sup> | U <sup>12</sup> |
|-------|-----------------|-----------------|-----------------|-----------------|-----------------|-----------------|
| C(1)  | 19.1(10)        | 12.3(9)         | 14.3(9)         | 3.4(7)          | -1.2(7)         | 0.2(8)          |
| N(1)  | 17.7(8)         | 12.0(8)         | 14.8(8)         | 0.5(6)          | 1.8(6)          | -0.1(7)         |
| C(2)  | 19.0(10)        | 15.8(10)        | 13.7(9)         | 2.9(7)          | 2.0(7)          | 2.9(8)          |
| C(3)  | 19.7(10)        | 16.4(10)        | 12.7(9)         | 4.8(7)          | 0.0(8)          | 2.2(8)          |
| C(4)  | 28.6(12)        | 17.4(10)        | 16.6(10)        | 0.9(8)          | 4.1(8)          | 3.6(9)          |
| C(5)  | 29.6(12)        | 24.8(11)        | 21.8(11)        | 3.6(9)          | 11.0(9)         | 8.8(9)          |
| C(6)  | 19.0(10)        | 28.3(12)        | 28.1(11)        | 6.5(9)          | 6.5(9)          | 2.3(9)          |
| C(7)  | 20.4(10)        | 20.9(10)        | 19.4(10)        | 1.5(8)          | 0.7(8)          | -1.9(9)         |
| C(8)  | 16.3(9)         | 14.3(9)         | 15.9(9)         | -1.2(7)         | 0.2(7)          | -2.2(8)         |
| N(2)  | 22.3(9)         | 18.1(9)         | 12.9(8)         | -3.0(7)         | 0.5(7)          | -2.9(7)         |
| C(11) | 20.5(10)        | 11.2(9)         | 14.9(9)         | -2.6(7)         | 0.4(8)          | -1.7(8)         |
| C(12) | 19.8(10)        | 17.3(10)        | 15.5(9)         | -2.1(8)         | 4.2(8)          | -1.1(8)         |
| C(13) | 21.7(10)        | 16.9(10)        | 19.3(10)        | -0.9(8)         | -0.9(8)         | 3.0(8)          |
| C(14) | 27.1(11)        | 12.7(9)         | 16.2(9)         | -1.1(8)         | -1.4(8)         | -2.7(8)         |
| C(15) | 22.4(11)        | 21.6(11)        | 21.5(10)        | 2.4(8)          | 5.7(8)          | -4.0(9)         |
| C(16) | 17.1(10)        | 18.4(10)        | 26.1(11)        | 1.6(8)          | 1.9(8)          | -0.7(8)         |
| C(17) | 33.3(12)        | 21.6(11)        | 20.7(11)        | 4.5(9)          | -1.2(9)         | -2.6(9)         |
| C(21) | 19.8(10)        | 11.9(9)         | 19.6(10)        | -0.8(8)         | 8.3(8)          | -2.1(8)         |
| C(22) | 22.5(11)        | 12.9(10)        | 26.9(11)        | 3.1(8)          | 6.7(9)          | -3.2(8)         |
| C(23) | 20.4(11)        | 18.5(11)        | 39.6(13)        | 0.3(9)          | 10.0(10)        | -1.1(9)         |

|       |          |           |          |           |          |           |
|-------|----------|-----------|----------|-----------|----------|-----------|
| C(24) | 34.3(13) | 22.3(12)  | 35.1(13) | -6.0(10)  | 21.3(11) | -4.9(10)  |
| C(25) | 36.1(13) | 22.1(11)  | 20.8(11) | -4.7(9)   | 11.6(9)  | -8.4(10)  |
| C(26) | 27.2(11) | 14.5(10)  | 17.8(10) | 0.8(8)    | 6.7(8)   | -5.4(8)   |
| C(27) | 29.3(12) | 23.5(11)  | 16.1(10) | 0.7(8)    | 1.5(8)   | -5.8(9)   |
| C(28) | 19.8(10) | 24.5(11)  | 27.5(12) | 7.3(9)    | 1.7(9)   | 2.9(9)    |
| C(98) | 19.0(11) | 28.5(12)  | 25.1(11) | 2.7(9)    | 2.1(9)   | -1.1(9)   |
| Cl(1) | 19.6(3)  | 56.3(4)   | 42.5(4)  | 5.5(3)    | 5.7(2)   | -5.2(3)   |
| Cl(2) | 25.6(3)  | 36.3(3)   | 23.0(3)  | 3.0(2)    | 2.0(2)   | -4.3(2)   |
| Cl(3) | 32.0(3)  | 47.7(4)   | 24.8(3)  | 5.3(3)    | 0.8(2)   | 13.6(3)   |
| C(99) | 29.6(13) | 38.5(15)  | 31.2(13) | -15.5(11) | 12.2(10) | -14.2(11) |
| F(1)  | 33.2(9)  | 101.0(15) | 50.0(10) | -40.5(10) | 16.9(7)  | -36.5(9)  |
| F(2)  | 84.2(14) | 25.4(9)   | 78.5(14) | -17.8(9)  | 25.1(11) | -6.5(9)   |
| F(3)  | 45.4(9)  | 78.6(12)  | 24.2(8)  | -21.5(8)  | 12.4(7)  | -22.7(9)  |
| S(1)  | 19.2(3)  | 20.0(3)   | 17.5(2)  | -1.6(2)   | -0.2(2)  | 0.2(2)    |
| O(1)  | 36.5(10) | 39.6(10)  | 18.4(8)  | 0.7(7)    | 4.2(7)   | -4.6(8)   |
| O(2)  | 19.0(8)  | 24.3(8)   | 29.4(8)  | 5.8(6)    | -3.4(6)  | -1.6(6)   |
| O(3)  | 30.1(9)  | 30.8(9)   | 38.5(10) | 4.3(8)    | 0.6(7)   | 11.5(7)   |

**3a2.** Table 5.

Hydrogen coordinates ( $\times 10^4$ ) and isotropic displacement parameters ( $\text{\AA}^2 \times 10^3$ ).

|        | x       | y        | z        | U(eq) |
|--------|---------|----------|----------|-------|
| H(1)   | -728    | 3160     | 1957     | 18    |
| H(4)   | -1218   | 6135     | 3801     | 25    |
| H(5)   | -3173   | 5433     | 3892     | 30    |
| H(6)   | -3978   | 4017     | 3211     | 30    |
| H(7)   | -2792   | 3281     | 2414     | 24    |
| H(8)   | 1874    | 5360     | 2475     | 19    |
| H(02)  | 730(20) | 5900(20) | 3234(12) | 17(6) |
| H(12)  | -1056   | 6652     | 2057     | 21    |
| H(13)  | -1416   | 7935     | 1212     | 23    |
| H(15)  | 1997    | 7387     | 627      | 26    |
| H(16)  | 2362    | 6099     | 1461     | 25    |
| H(17A) | 430     | 9349     | 438      | 38    |
| H(17B) | -857    | 8770     | 213      | 38    |
| H(17C) | 381     | 8385     | -100     | 38    |
| H(23)  | 4182    | 2768     | 1575     | 31    |
| H(24)  | 3599    | 2781     | 464      | 36    |
| H(25)  | 1633    | 3350     | 82       | 31    |
| H(27A) | -290    | 4142     | 230      | 34    |
| H(27B) | -385    | 4889     | 870      | 34    |
| H(27C) | -871    | 3636     | 860      | 34    |
| H(28A) | 3550    | 4065     | 2687     | 36    |
| H(28B) | 3457    | 2741     | 2710     | 36    |
| H(28C) | 2287    | 3484     | 2854     | 36    |
| H(98)  | 5248    | 4586     | 1025     | 29    |

**3a2.** Table 6. Hydrogen bonds [ $\text{\AA}$  and  $^\circ$ ].

| D-H...A               | d(D-H)  | d(H...A) | d(D...A) | $\angle(\text{DHA})$ |
|-----------------------|---------|----------|----------|----------------------|
| C(98)-H(98)...O(3)    | 1.00    | 2.42     | 3.300(3) | 146.7                |
| N(2)-H(02)...O(2)#1   | 0.81(2) | 2.01(3)  | 2.824(2) | 174(2)               |
| C(8)-H(8)...O(1)#1    | 1.00    | 2.53     | 3.350(3) | 139.0                |
| C(1)-H(1)...O(2)#2    | 0.95    | 2.46     | 3.379(3) | 161.6                |
| C(27)-H(27C)...O(2)#2 | 0.98    | 2.43     | 3.351(3) | 157.3                |
| C(5)-H(5)...F(1)#3    | 0.95    | 2.52     | 3.378(3) | 150.9                |

Symmetry transformations used to generate equivalent atoms:

#1  $-x+1, y+1/2, -z+1/2$  #2  $x-1, y, z$  #3  $-x, y+1/2, -z+1/2$

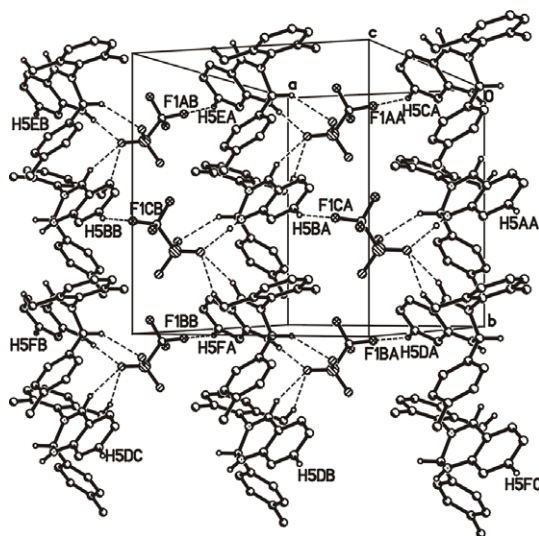

View of the hydrogen bond interactions in **3a2**.

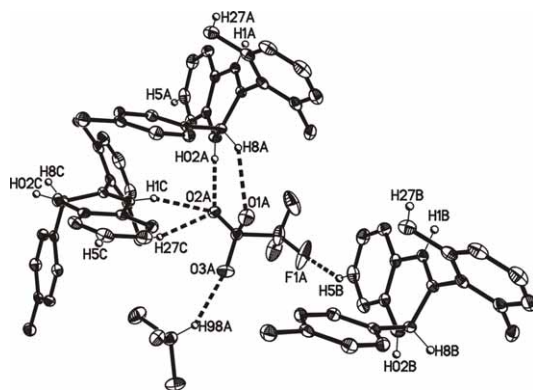

The hydrogen bond environment of the anions in **3a2**.

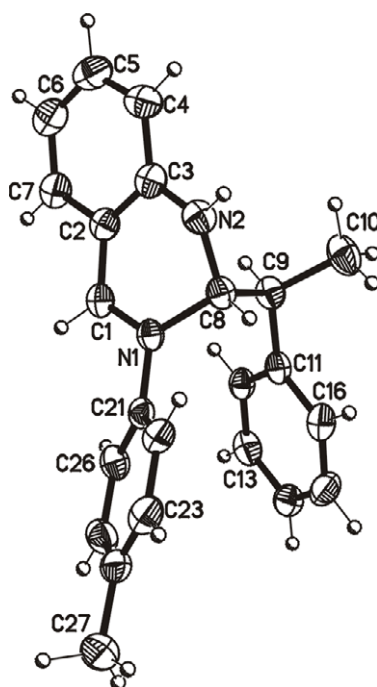

Table 1. Crystal data and structure refinement of **3b3**.

|                                   |                                                                                |         |
|-----------------------------------|--------------------------------------------------------------------------------|---------|
| Identification code               | ajf53bsi                                                                       |         |
| Empirical formula                 | C <sub>24</sub> H <sub>23</sub> F <sub>3</sub> N <sub>2</sub> O <sub>3</sub> S |         |
| Formula weight                    | 476.50                                                                         |         |
| Temperature                       | 100(2) K                                                                       |         |
| Wavelength                        | 0.71073 Å                                                                      |         |
| Crystal system                    | Orthorhombic                                                                   |         |
| Space group                       | P bca                                                                          |         |
| Unit cell dimensions              | a = 17.6246(14) Å                                                              | α = 90° |
|                                   | b = 12.9407(11) Å                                                              | β = 90° |
|                                   | c = 20.1134(17) Å                                                              | γ = 90° |
| Volume                            | 4587.4(7) Å <sup>3</sup>                                                       |         |
| Z                                 | 8                                                                              |         |
| Density (calculated)              | 1.380 Mg/m <sup>3</sup>                                                        |         |
| Absorption coefficient            | 0.194 mm <sup>-1</sup>                                                         |         |
| F(000)                            | 1984                                                                           |         |
| Crystal size                      | 0.12 x 0.12 x 0.12 mm <sup>3</sup>                                             |         |
| Theta range for data collection   | 2.03 to 28.81°                                                                 |         |
| Index ranges                      | -23 ≤ h ≤ 22, -17 ≤ k ≤ 17, -25 ≤ l ≤ 27                                       |         |
| Reflections collected             | 54529                                                                          |         |
| Independent reflections           | 5745 [R(int) = 0.0599]                                                         |         |
| Completeness to theta = 26.00°    | 100.0 %                                                                        |         |
| Absorption correction             | Semi-empirical from equivalents                                                |         |
| Max. and min. transmission        | 0.9771 and 0.8769                                                              |         |
| Refinement method                 | Full-matrix least-squares on F <sup>2</sup>                                    |         |
| Data / restraints / parameters    | 5745 / 46 / 297                                                                |         |
| Goodness-of-fit on F <sup>2</sup> | 1.029                                                                          |         |
| Final R indices [I > 2σ(I)]       | R1 = 0.0837, wR2 = 0.2030                                                      |         |
| R indices (all data)              | R1 = 0.1136, wR2 = 0.2232                                                      |         |
| Largest diff. peak and hole       | 1.303 and -0.985 e.Å <sup>-3</sup>                                             |         |

**3b3.** Table 2. Atomic coordinates ( $\times 10^4$ ) and equivalent isotropic displacement parameters ( $\text{\AA}^2 \times 10^3$ ).  $U(\text{eq})$  is defined as one third of the trace of the orthogonalized  $U_{ij}$  tensor.

|        | x          | y          | z          | U(eq)    |
|--------|------------|------------|------------|----------|
| C(1)   | 4622.6(19) | 4457(2)    | 3054.3(16) | 29.1(7)  |
| N(1)   | 4434.5(14) | 4278.7(19) | 2435.1(13) | 26.8(5)  |
| C(2)   | 4147.0(19) | 4152(2)    | 3587.0(16) | 30.9(7)  |
| C(3)   | 3382(2)    | 3930(2)    | 3429.1(17) | 32.6(7)  |
| C(4)   | 2847(2)    | 3871(3)    | 3949.3(19) | 40.5(8)  |
| C(5)   | 3085(2)    | 4011(3)    | 4593(2)    | 46.0(9)  |
| C(6)   | 3845(3)    | 4202(3)    | 4755.1(18) | 44.6(9)  |
| C(7)   | 4368(2)    | 4282(3)    | 4257.7(17) | 37.6(8)  |
| C(8)   | 3783.1(18) | 3565(2)    | 2313.4(16) | 30.0(7)  |
| N(2)   | 3197.0(16) | 3843(2)    | 2778.4(15) | 33.8(6)  |
| C(9)   | 4045.1(18) | 2427(2)    | 2396.9(17) | 31.9(7)  |
| C(10)  | 3379(2)    | 1720(3)    | 2218(2)    | 45.4(9)  |
| C(11)  | 4763.2(18) | 2213(2)    | 2009.6(16) | 30.1(7)  |
| C(12)  | 5447.4(19) | 2096(2)    | 2342.8(17) | 30.2(7)  |
| C(13)  | 6117(2)    | 1912(3)    | 2000.2(19) | 38.7(8)  |
| C(14)  | 6109(2)    | 1847(3)    | 1313(2)    | 42.3(9)  |
| C(15)  | 5431(2)    | 1978(3)    | 973.3(18)  | 42.6(9)  |
| C(16)  | 4765(2)    | 2148(3)    | 1316.2(17) | 36.6(8)  |
| C(21)  | 4844.2(18) | 4725(2)    | 1879.7(15) | 27.6(6)  |
| C(22)  | 4442(2)    | 5165(3)    | 1359.8(16) | 33.3(7)  |
| C(23)  | 4848(2)    | 5630(3)    | 847.5(17)  | 39.6(8)  |
| C(24)  | 5635(2)    | 5674(3)    | 847.7(18)  | 39.4(8)  |
| C(25)  | 6013(2)    | 5214(3)    | 1375.4(19) | 39.7(8)  |
| C(26)  | 5628.9(19) | 4728(2)    | 1889.5(18) | 33.4(7)  |
| C(27)  | 6063(3)    | 6210(3)    | 295(2)     | 56.7(11) |
| C(99)  | 2004(4)    | 3085(5)    | 750(3)     | 38.1(15) |
| F(1)   | 1952(3)    | 3471(4)    | 133(2)     | 52.1(14) |
| F(2)   | 1505(4)    | 2345(5)    | 868(3)     | 84(2)    |
| F(3)   | 2676(2)    | 2668(3)    | 812(2)     | 50.1(13) |
| S(1)   | 1869.5(12) | 4087(2)    | 1341.5(10) | 24.4(6)  |
| O(1)   | 1903(4)    | 3598(5)    | 1983(3)    | 35.4(18) |
| O(2)   | 2580(4)    | 4583(6)    | 1174(4)    | 56(2)    |
| O(3)   | 1135(3)    | 4497(5)    | 1184(3)    | 46.0(14) |
| C(99') | 1708(6)    | 3146(7)    | 833(4)     | 48(3)    |
| F(1')  | 1739(4)    | 3263(6)    | 181(3)     | 54(2)    |
| F(2')  | 1011(4)    | 2734(5)    | 894(3)     | 70(2)    |
| F(3')  | 2180(5)    | 2337(6)    | 925(4)     | 81(3)    |
| S(1')  | 1879.5(16) | 4276(3)    | 1352.1(14) | 24.1(9)  |
| O(1')  | 1860(5)    | 3816(7)    | 2015(4)    | 33(2)    |
| O(2')  | 2504(4)    | 4853(6)    | 1189(3)    | 30.1(17) |
| O(3')  | 1236(3)    | 4879(5)    | 1205(3)    | 26.7(14) |

**3b3.** Table 3. Bond lengths [ $\text{\AA}$ ] and angles [ $^\circ$ ].

|            |          |             |          |
|------------|----------|-------------|----------|
| C(1)-N(1)  | 1.309(4) | C(6)-C(7)   | 1.364(5) |
| C(1)-C(2)  | 1.416(5) | C(8)-N(2)   | 1.439(4) |
| N(1)-C(21) | 1.450(4) | C(8)-C(9)   | 1.552(4) |
| N(1)-C(8)  | 1.494(4) | C(9)-C(11)  | 1.512(5) |
| C(2)-C(3)  | 1.414(5) | C(9)-C(10)  | 1.532(5) |
| C(2)-C(7)  | 1.414(5) | C(11)-C(12) | 1.388(4) |
| C(3)-N(2)  | 1.353(4) | C(11)-C(16) | 1.397(5) |
| C(3)-C(4)  | 1.411(5) | C(12)-C(13) | 1.387(5) |
| C(4)-C(5)  | 1.374(6) | C(13)-C(14) | 1.386(5) |
| C(5)-C(6)  | 1.400(6) | C(14)-C(15) | 1.385(6) |

|                  |           |                    |          |
|------------------|-----------|--------------------|----------|
| C(15)-C(16)      | 1.380(5)  | C(10)-C(9)-C(8)    | 108.3(3) |
| C(21)-C(26)      | 1.383(5)  | C(12)-C(11)-C(16)  | 118.3(3) |
| C(21)-C(22)      | 1.385(5)  | C(12)-C(11)-C(9)   | 119.9(3) |
| C(22)-C(23)      | 1.391(5)  | C(16)-C(11)-C(9)   | 121.8(3) |
| C(23)-C(24)      | 1.389(5)  | C(13)-C(12)-C(11)  | 121.2(3) |
| C(24)-C(25)      | 1.387(5)  | C(14)-C(13)-C(12)  | 119.9(3) |
| C(24)-C(27)      | 1.512(5)  | C(15)-C(14)-C(13)  | 119.5(3) |
| C(25)-C(26)      | 1.387(5)  | C(16)-C(15)-C(14)  | 120.5(3) |
| C(99)-F(3)       | 1.308(7)  | C(15)-C(16)-C(11)  | 120.7(3) |
| C(99)-F(2)       | 1.321(7)  | C(26)-C(21)-C(22)  | 121.4(3) |
| C(99)-F(1)       | 1.341(7)  | C(26)-C(21)-N(1)   | 119.2(3) |
| C(99)-S(1)       | 1.777(7)  | C(22)-C(21)-N(1)   | 119.4(3) |
| S(1)-O(3)        | 1.434(5)  | C(21)-C(22)-C(23)  | 118.3(3) |
| S(1)-O(1)        | 1.438(6)  | C(24)-C(23)-C(22)  | 122.0(3) |
| S(1)-O(2)        | 1.446(6)  | C(25)-C(24)-C(23)  | 117.6(3) |
| C(99')-F(1')     | 1.320(9)  | C(25)-C(24)-C(27)  | 121.3(4) |
| C(99')-F(2')     | 1.344(10) | C(23)-C(24)-C(27)  | 121.2(4) |
| C(99')-F(3')     | 1.350(10) | C(26)-C(25)-C(24)  | 122.0(3) |
| C(99')-S(1')     | 1.822(9)  | C(21)-C(26)-C(25)  | 118.7(3) |
| S(1')-O(2')      | 1.370(7)  | F(3)-C(99)-F(2)    | 106.6(5) |
| S(1')-O(3')      | 1.408(6)  | F(3)-C(99)-F(1)    | 107.7(5) |
| S(1')-O(1')      | 1.460(7)  | F(2)-C(99)-F(1)    | 113.0(5) |
|                  |           | F(3)-C(99)-S(1)    | 111.0(4) |
| N(1)-C(1)-C(2)   | 121.4(3)  | F(2)-C(99)-S(1)    | 108.7(5) |
| C(1)-N(1)-C(21)  | 122.5(3)  | F(1)-C(99)-S(1)    | 109.8(4) |
| C(1)-N(1)-C(8)   | 117.3(3)  | O(3)-S(1)-O(1)     | 113.4(4) |
| C(21)-N(1)-C(8)  | 120.2(2)  | O(3)-S(1)-O(2)     | 124.5(4) |
| C(3)-C(2)-C(7)   | 120.1(3)  | O(1)-S(1)-O(2)     | 111.6(4) |
| C(3)-C(2)-C(1)   | 116.8(3)  | O(3)-S(1)-C(99)    | 104.0(3) |
| C(7)-C(2)-C(1)   | 121.7(3)  | O(1)-S(1)-C(99)    | 105.9(3) |
| N(2)-C(3)-C(4)   | 123.4(3)  | O(2)-S(1)-C(99)    | 93.0(4)  |
| N(2)-C(3)-C(2)   | 117.6(3)  | F(1')-C(99')-F(2') | 100.1(7) |
| C(4)-C(3)-C(2)   | 118.8(3)  | F(1')-C(99')-F(3') | 101.5(8) |
| C(5)-C(4)-C(3)   | 119.2(4)  | F(2')-C(99')-F(3') | 104.1(7) |
| C(4)-C(5)-C(6)   | 122.3(4)  | F(1')-C(99')-S(1') | 118.0(7) |
| C(7)-C(6)-C(5)   | 119.3(4)  | F(2')-C(99')-S(1') | 114.7(7) |
| C(6)-C(7)-C(2)   | 120.3(4)  | F(3')-C(99')-S(1') | 116.2(7) |
| N(2)-C(8)-N(1)   | 106.9(3)  | O(2')-S(1')-O(3')  | 107.1(5) |
| N(2)-C(8)-C(9)   | 112.3(3)  | O(2')-S(1')-O(1')  | 117.4(5) |
| N(1)-C(8)-C(9)   | 109.9(2)  | O(3')-S(1')-O(1')  | 113.5(4) |
| C(3)-N(2)-C(8)   | 118.4(3)  | O(2')-S(1')-C(99') | 115.7(5) |
| C(11)-C(9)-C(10) | 114.2(3)  | O(3')-S(1')-C(99') | 101.0(4) |
| C(11)-C(9)-C(8)  | 111.6(3)  | O(1')-S(1')-C(99') | 101.1(5) |

**3b3.** Table 4. Anisotropic displacement parameters ( $\text{\AA}^2 \times 10^3$ ). The anisotropic displacement factor exponent takes the form:  $-2\pi^2 [h^2 a^{*2} U^{11} + \dots + 2 h k a^* b^* U^{12}]$

|       | U <sup>11</sup> | U <sup>22</sup> | U <sup>33</sup> | U <sup>23</sup> | U <sup>13</sup> | U <sup>12</sup> |
|-------|-----------------|-----------------|-----------------|-----------------|-----------------|-----------------|
| C(1)  | 32.5(16)        | 22.9(14)        | 31.9(16)        | 0.7(12)         | -6.8(13)        | 2.5(12)         |
| N(1)  | 28.8(13)        | 21.2(12)        | 30.4(13)        | 0.4(10)         | -4.2(10)        | 1.0(10)         |
| C(2)  | 34.5(17)        | 25.1(15)        | 33.0(16)        | 1.5(12)         | -1.7(13)        | 4.7(13)         |
| C(3)  | 35.3(17)        | 25.0(15)        | 37.5(18)        | 0.9(13)         | -2.6(14)        | 8.5(13)         |
| C(4)  | 38.0(18)        | 31.8(17)        | 52(2)           | 6.9(16)         | 8.4(16)         | 7.3(15)         |
| C(5)  | 62(3)           | 33.7(19)        | 42(2)           | 7.9(16)         | 15.1(18)        | 9.5(17)         |
| C(6)  | 70(3)           | 32.1(18)        | 31.6(18)        | 6.9(14)         | 1.9(17)         | 4.6(18)         |
| C(7)  | 47(2)           | 31.6(17)        | 34.1(18)        | 3.3(14)         | -5.4(15)        | 2.4(15)         |
| C(8)  | 29.7(16)        | 29.1(16)        | 31.3(16)        | 1.4(12)         | -5.1(13)        | -0.7(12)        |
| N(2)  | 26.2(14)        | 34.7(15)        | 40.5(16)        | 1.6(12)         | -3.4(12)        | 3.8(11)         |
| C(9)  | 30.4(16)        | 27.7(15)        | 37.6(17)        | 0.0(13)         | -3.3(13)        | 1.1(13)         |
| C(10) | 36.0(19)        | 30.5(17)        | 70(3)           | -2.2(17)        | -4.4(18)        | -0.4(15)        |
| C(11) | 33.6(17)        | 22.2(14)        | 34.5(17)        | -0.9(12)        | -4.7(13)        | -1.8(12)        |
| C(12) | 36.0(17)        | 22.9(14)        | 31.5(16)        | -0.2(12)        | -4.2(13)        | -0.6(12)        |
| C(13) | 33.2(18)        | 32.4(17)        | 50(2)           | -3.1(15)        | -6.1(15)        | -2.0(14)        |
| C(14) | 45(2)           | 34.3(18)        | 48(2)           | -9.1(16)        | 9.8(17)         | -4.5(16)        |
| C(15) | 61(2)           | 36.9(19)        | 29.7(17)        | -5.5(14)        | 3.8(16)         | -2.8(17)        |
| C(16) | 42.7(19)        | 30.5(17)        | 36.6(18)        | -3.0(14)        | -9.9(15)        | 0.0(14)         |
| C(21) | 33.9(16)        | 19.5(13)        | 29.4(15)        | -2.6(12)        | 0.1(12)         | -0.2(12)        |
| C(22) | 39.6(18)        | 31.2(16)        | 29.0(16)        | -1.8(13)        | -2.0(14)        | 3.3(14)         |
| C(23) | 58(2)           | 30.0(17)        | 30.7(17)        | 0.7(14)         | -1.9(16)        | 5.6(16)         |
| C(24) | 54(2)           | 25.8(17)        | 38.5(19)        | -4.9(14)        | 11.2(16)        | -3.1(15)        |
| C(25) | 38.0(19)        | 28.5(17)        | 53(2)           | -3.6(15)        | 7.4(16)         | -2.7(14)        |
| C(26) | 34.3(17)        | 25.2(15)        | 40.7(18)        | 0.7(13)         | -4.5(14)        | 0.7(13)         |
| C(27) | 80(3)           | 40(2)           | 50(2)           | 1.0(18)         | 16(2)           | -14(2)          |

**3b3.** Table 5. Hydrogen coordinates ( $\times 10^4$ ) and isotropic displacement parameters ( $\text{\AA}^2 \times 10^3$ ).

|        | x        | y        | z        | U(eq)  |
|--------|----------|----------|----------|--------|
| H(1)   | 5088     | 4797     | 3148     | 35     |
| H(4)   | 2328     | 3735     | 3855     | 49     |
| H(5)   | 2721     | 3977     | 4941     | 55     |
| H(6)   | 3995     | 4276     | 5206     | 53     |
| H(7)   | 4883     | 4426     | 4362     | 45     |
| H(8)   | 3591     | 3669     | 1850     | 36     |
| H(02)  | 2730(20) | 3860(30) | 2640(20) | 46(11) |
| H(9)   | 4162     | 2317     | 2878     | 38     |
| H(10A) | 3241     | 1825     | 1750     | 68     |
| H(10B) | 2944     | 1884     | 2501     | 68     |
| H(10C) | 3527     | 998      | 2286     | 68     |
| H(12)  | 5457     | 2143     | 2814     | 36     |
| H(13)  | 6580     | 1832     | 2236     | 46     |
| H(14)  | 6564     | 1713     | 1076     | 51     |
| H(15)  | 5426     | 1950     | 501      | 51     |
| H(16)  | 4302     | 2223     | 1078     | 44     |
| H(22)  | 3904     | 5149     | 1353     | 40     |
| H(23)  | 4577     | 5927     | 486      | 48     |
| H(25)  | 6552     | 5233     | 1385     | 48     |
| H(26)  | 5899     | 4405     | 2241     | 40     |
| H(27A) | 5728     | 6302     | -89      | 85     |
| H(27B) | 6501     | 5789     | 166      | 85     |
| H(27C) | 6238     | 6887     | 451      | 85     |

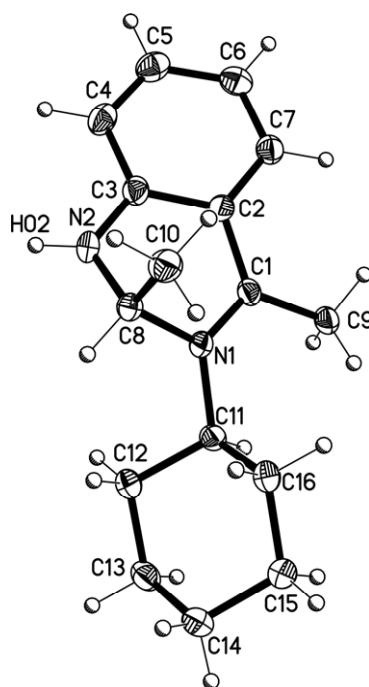

Table 1. Crystal data and structure refinement **3d4**.

|                                   |                                                                                |                |
|-----------------------------------|--------------------------------------------------------------------------------|----------------|
| Identification code               | j30s                                                                           |                |
| Empirical formula                 | C <sub>17</sub> H <sub>23</sub> F <sub>3</sub> N <sub>2</sub> O <sub>3</sub> S |                |
| Formula weight                    | 392.43                                                                         |                |
| Temperature                       | 100(2) K                                                                       |                |
| Wavelength                        | 0.71073 Å                                                                      |                |
| Crystal system                    | Monoclinic                                                                     |                |
| Space group                       | P 2(1)/n                                                                       |                |
| Unit cell dimensions              | a = 10.9025(11) Å                                                              | α = 90°        |
|                                   | b = 13.0141(13) Å                                                              | β = 96.094(2)° |
|                                   | c = 13.1294(14) Å                                                              | γ = 90°        |
| Volume                            | 1852.4(3) Å <sup>3</sup>                                                       |                |
| Z                                 | 4                                                                              |                |
| Density (calculated)              | 1.407 Mg/m <sup>3</sup>                                                        |                |
| Absorption coefficient            | 0.223 mm <sup>-1</sup>                                                         |                |
| F(000)                            | 824                                                                            |                |
| Crystal size                      | 0.26 x 0.08 x 0.07 mm <sup>3</sup>                                             |                |
| Theta range for data collection   | 2.21 to 28.70°                                                                 |                |
| Index ranges                      | -14 ≤ h ≤ 14, -17 ≤ k ≤ 17, -17 ≤ l ≤ 17                                       |                |
| Reflections collected             | 21913                                                                          |                |
| Independent reflections           | 4547 [R(int) = 0.0335]                                                         |                |
| Completeness to theta = 26.00°    | 100.0 %                                                                        |                |
| Absorption correction             | Semi-empirical from equivalents                                                |                |
| Max. and min. transmission        | 0.9846 and 0.8676                                                              |                |
| Refinement method                 | Full-matrix least-squares on F <sup>2</sup>                                    |                |
| Data / restraints / parameters    | 4547 / 0 / 241                                                                 |                |
| Goodness-of-fit on F <sup>2</sup> | 1.028                                                                          |                |
| Final R indices [I > 2σ(I)]       | R1 = 0.0464, wR2 = 0.1106                                                      |                |
| R indices (all data)              | R1 = 0.0592, wR2 = 0.1176                                                      |                |
| Largest diff. peak and hole       | 0.518 and -0.443 e.Å <sup>-3</sup>                                             |                |



**3d4.** Table 2. Atomic coordinates ( $\times 10^4$ ) and equivalent isotropic displacement parameters ( $\text{\AA}^2 \times 10^3$ ). U(eq) is defined as one third of the trace of the orthogonalized Uij tensor.

|       | x           | y          | z          | U(eq)   |
|-------|-------------|------------|------------|---------|
| C(1)  | 2246.2(15)  | 4931.4(12) | 948.1(12)  | 18.8(3) |
| N(1)  | 2446.8(13)  | 3981.4(11) | 1273.1(10) | 19.0(3) |
| C(2)  | 1239.8(15)  | 5502.2(13) | 1301.6(13) | 20.0(3) |
| C(3)  | 324.5(16)   | 4938.5(13) | 1753.9(13) | 22.0(3) |
| N(2)  | 591.4(14)   | 3960.8(12) | 2045.1(12) | 24.9(3) |
| C(4)  | -824.2(16)  | 5398.4(15) | 1860.9(14) | 25.9(4) |
| C(5)  | -1016.8(17) | 6408.5(15) | 1598.1(14) | 28.1(4) |
| C(6)  | -90.0(17)   | 6994.7(14) | 1207.8(14) | 26.5(4) |
| C(7)  | 1010.1(16)  | 6543.9(13) | 1049.5(13) | 22.9(4) |
| C(8)  | 1858.7(16)  | 3660.2(13) | 2200.2(13) | 22.3(4) |
| C(9)  | 2996.0(16)  | 5388.6(13) | 178.1(13)  | 21.7(3) |
| C(10) | 2551.1(17)  | 4125.4(14) | 3158.4(13) | 26.0(4) |
| C(11) | 3226.5(15)  | 3238.3(12) | 760.0(13)  | 19.5(3) |
| C(12) | 2664.2(16)  | 2162.7(13) | 701.9(14)  | 22.6(4) |
| C(13) | 3409.9(17)  | 1482.3(13) | 45.9(14)   | 25.1(4) |
| C(14) | 4750.9(17)  | 1423.6(13) | 505.7(15)  | 27.2(4) |
| C(15) | 5314.1(17)  | 2494.5(14) | 646.5(16)  | 29.1(4) |
| C(16) | 4547.8(16)  | 3201.4(13) | 1263.1(15) | 25.1(4) |
| C(99) | 6016.2(17)  | 5797.6(14) | 3662.6(14) | 27.5(4) |
| F(1)  | 7241.4(10)  | 5768.9(9)  | 3829.3(10) | 39.0(3) |
| F(2)  | 5609.4(14)  | 6333.5(13) | 4422.2(9)  | 55.0(4) |
| F(3)  | 5609.2(12)  | 4843.9(10) | 3716.3(11) | 51.3(4) |
| S(1)  | 5517.0(4)   | 6382.9(3)  | 2425.4(3)  | 19.1(1) |
| O(1)  | 6007.9(12)  | 5703.7(10) | 1707.2(10) | 31.0(3) |
| O(2)  | 6101.5(12)  | 7379.1(9)  | 2509.4(11) | 28.9(3) |
| O(3)  | 4193.6(11)  | 6399.6(10) | 2391.5(10) | 26.5(3) |

**3d4.** Table 3. Bond lengths [ $\text{\AA}$ ] and angles [ $^\circ$ ].

|             |            |                  |            |
|-------------|------------|------------------|------------|
| C(1)-N(1)   | 1.319(2)   | S(1)-O(3)        | 1.4390(13) |
| C(1)-C(2)   | 1.442(2)   | S(1)-O(2)        | 1.4437(13) |
| C(1)-C(9)   | 1.490(2)   |                  |            |
| N(1)-C(11)  | 1.494(2)   | N(1)-C(1)-C(2)   | 118.99(14) |
| N(1)-C(8)   | 1.494(2)   | N(1)-C(1)-C(9)   | 120.66(15) |
| C(2)-C(7)   | 1.412(2)   | C(2)-C(1)-C(9)   | 120.25(14) |
| C(2)-C(3)   | 1.419(2)   | C(1)-N(1)-C(11)  | 122.93(13) |
| C(3)-N(2)   | 1.351(2)   | C(1)-N(1)-C(8)   | 117.07(13) |
| C(3)-C(4)   | 1.408(2)   | C(11)-N(1)-C(8)  | 119.99(13) |
| N(2)-C(8)   | 1.430(2)   | C(7)-C(2)-C(3)   | 118.66(15) |
| C(4)-C(5)   | 1.370(3)   | C(7)-C(2)-C(1)   | 122.78(15) |
| C(5)-C(6)   | 1.405(3)   | C(3)-C(2)-C(1)   | 117.48(15) |
| C(6)-C(7)   | 1.371(2)   | N(2)-C(3)-C(4)   | 122.61(16) |
| C(8)-C(10)  | 1.522(3)   | N(2)-C(3)-C(2)   | 117.74(16) |
| C(11)-C(16) | 1.520(2)   | C(4)-C(3)-C(2)   | 119.64(16) |
| C(11)-C(12) | 1.527(2)   | C(3)-N(2)-C(8)   | 118.28(14) |
| C(12)-C(13) | 1.528(2)   | C(5)-C(4)-C(3)   | 119.80(17) |
| C(13)-C(14) | 1.523(3)   | C(4)-C(5)-C(6)   | 121.05(17) |
| C(14)-C(15) | 1.526(2)   | C(7)-C(6)-C(5)   | 119.84(17) |
| C(15)-C(16) | 1.531(2)   | C(6)-C(7)-C(2)   | 120.78(16) |
| C(99)-F(3)  | 1.323(2)   | N(2)-C(8)-N(1)   | 107.40(14) |
| C(99)-F(2)  | 1.331(2)   | N(2)-C(8)-C(10)  | 113.32(14) |
| C(99)-F(1)  | 1.331(2)   | N(1)-C(8)-C(10)  | 110.11(14) |
| C(99)-S(1)  | 1.8240(19) | N(1)-C(11)-C(16) | 112.50(13) |
| S(1)-O(1)   | 1.4367(13) | N(1)-C(11)-C(12) | 111.79(13) |

|                   |            |                 |            |
|-------------------|------------|-----------------|------------|
| C(16)-C(11)-C(12) | 110.46(14) | F(3)-C(99)-S(1) | 111.67(13) |
| C(11)-C(12)-C(13) | 108.94(14) | F(2)-C(99)-S(1) | 110.91(13) |
| C(14)-C(13)-C(12) | 110.57(14) | F(1)-C(99)-S(1) | 110.94(12) |
| C(13)-C(14)-C(15) | 111.04(14) | O(1)-S(1)-O(3)  | 115.54(8)  |
| C(14)-C(15)-C(16) | 112.19(15) | O(1)-S(1)-O(2)  | 114.23(8)  |
| C(11)-C(16)-C(15) | 109.53(14) | O(3)-S(1)-O(2)  | 114.95(8)  |
| F(3)-C(99)-F(2)   | 108.15(16) | O(1)-S(1)-C(99) | 103.36(9)  |
| F(3)-C(99)-F(1)   | 107.54(15) | O(3)-S(1)-C(99) | 103.72(8)  |
| F(2)-C(99)-F(1)   | 107.45(16) | O(2)-S(1)-C(99) | 102.68(8)  |

**3d4.** Table 4. Anisotropic displacement parameters ( $\text{\AA}^2 \times 10^3$ ). The anisotropic displacement factor exponent takes the form:  $-2\pi^2 [h^2 a^{*2} U^{11} + \dots + 2 h k a^* b^* U^{12}]$

|       | U <sup>11</sup> | U <sup>22</sup> | U <sup>33</sup> | U <sup>23</sup> | U <sup>13</sup> | U <sup>12</sup> |
|-------|-----------------|-----------------|-----------------|-----------------|-----------------|-----------------|
| C(1)  | 21.0(8)         | 17.1(8)         | 18.4(8)         | -2.3(6)         | 3.3(6)          | -4.7(6)         |
| N(1)  | 21.1(7)         | 17.6(6)         | 19.3(7)         | -0.2(5)         | 7.8(5)          | -2.7(5)         |
| C(2)  | 19.4(8)         | 20.5(8)         | 20.4(8)         | -2.0(6)         | 3.9(6)          | -2.1(6)         |
| C(3)  | 22.7(8)         | 23.2(8)         | 20.6(8)         | -3.0(6)         | 4.3(6)          | -5.0(7)         |
| N(2)  | 22.4(7)         | 22.2(7)         | 32.0(8)         | 0.9(6)          | 11.1(6)         | -5.9(6)         |
| C(4)  | 19.4(8)         | 33.1(10)        | 25.5(9)         | -2.8(7)         | 3.6(7)          | -3.8(7)         |
| C(5)  | 21.1(8)         | 35.7(10)        | 26.9(9)         | -4.3(8)         | 0.5(7)          | 3.1(7)          |
| C(6)  | 28.7(9)         | 23.3(9)         | 26.7(9)         | -1.3(7)         | -0.6(7)         | 3.4(7)          |
| C(7)  | 24.9(8)         | 22.3(8)         | 21.8(8)         | -0.5(6)         | 3.6(7)          | -2.4(7)         |
| C(8)  | 27.4(9)         | 18.3(8)         | 23.1(8)         | 2.2(6)          | 11.3(7)         | -1.5(7)         |
| C(9)  | 26.2(9)         | 17.8(8)         | 22.0(8)         | -0.3(6)         | 7.4(7)          | -4.1(6)         |
| C(10) | 30.9(9)         | 26.1(9)         | 21.9(9)         | 1.2(7)          | 6.8(7)          | 1.1(7)          |
| C(11) | 23.9(8)         | 16.7(7)         | 18.7(8)         | -0.6(6)         | 6.6(6)          | -0.4(6)         |
| C(12) | 22.5(8)         | 19.0(8)         | 26.6(9)         | -2.8(7)         | 3.0(7)          | -4.4(6)         |
| C(13) | 33.0(10)        | 17.9(8)         | 25.0(9)         | -2.6(6)         | 5.8(7)          | -2.5(7)         |
| C(14) | 30.3(10)        | 18.8(8)         | 33.4(10)        | 0.3(7)          | 8.0(8)          | 1.9(7)          |
| C(15) | 21.6(9)         | 22.7(9)         | 44.0(11)        | -3.5(8)         | 8.8(8)          | -1.7(7)         |
| C(16) | 21.0(8)         | 21.6(8)         | 32.9(10)        | -4.4(7)         | 4.1(7)          | -5.1(7)         |
| C(99) | 25.1(9)         | 31.1(10)        | 26.5(9)         | 5.8(7)          | 3.2(7)          | -2.7(7)         |
| F(1)  | 24.3(6)         | 43.0(7)         | 47.3(7)         | 15.4(6)         | -7.5(5)         | -1.0(5)         |
| F(2)  | 57.4(9)         | 87.8(11)        | 20.9(6)         | -3.3(6)         | 9.0(6)          | 9.6(8)          |
| F(3)  | 43.3(7)         | 41.8(7)         | 66.6(9)         | 30.0(7)         | -4.4(6)         | -14.3(6)        |
| S(1)  | 18.9(2)         | 19.5(2)         | 19.6(2)         | -0.9(2)         | 5.8(2)          | 3.0(2)          |
| O(1)  | 29.3(7)         | 35.1(7)         | 30.2(7)         | -11.5(6)        | 10.6(5)         | 3.5(6)          |
| O(2)  | 26.3(7)         | 19.6(6)         | 42.4(8)         | 2.8(5)          | 10.6(6)         | 2.0(5)          |
| O(3)  | 20.4(6)         | 30.5(7)         | 28.8(7)         | -2.6(5)         | 3.7(5)          | 3.6(5)          |

**3d4.** Table 5. Hydrogen coordinates ( $\times 10^4$ ) and isotropic displacement parameters ( $\text{\AA}^2 \times 10^3$ ).

|        | x      | y        | z        | U(eq) |
|--------|--------|----------|----------|-------|
| H(02)  | 50(20) | 3561(17) | 2203(18) | 35(6) |
| H(4)   | -1463  | 5009     | 2115     | 31    |
| H(5)   | -1789  | 6718     | 1681     | 34    |
| H(6)   | -226   | 7702     | 1054     | 32    |
| H(7)   | 1625   | 6937     | 767      | 28    |
| H(8)   | 1901   | 2894     | 2257     | 27    |
| H(9A)  | 3842   | 5126     | 291      | 33    |
| H(9B)  | 3005   | 6138     | 249      | 33    |
| H(9C)  | 2634   | 5202     | -513     | 33    |
| H(10A) | 2530   | 4877     | 3107     | 39    |
| H(10B) | 3410   | 3890     | 3224     | 39    |
| H(10C) | 2160   | 3909     | 3762     | 39    |

|        |      |      |      |    |
|--------|------|------|------|----|
| H(11)  | 3255 | 3482 | 41   | 23 |
| H(12A) | 1796 | 2197 | 395  | 27 |
| H(12B) | 2679 | 1869 | 1399 | 27 |
| H(13A) | 3050 | 783  | 2    | 30 |
| H(13B) | 3369 | 1766 | -656 | 30 |
| H(14A) | 5230 | 1015 | 50   | 33 |
| H(14B) | 4798 | 1072 | 1177 | 33 |
| H(15A) | 5379 | 2804 | -35  | 35 |
| H(15B) | 6158 | 2436 | 1003 | 35 |
| H(16A) | 4561 | 2942 | 1973 | 30 |
| H(16B) | 4905 | 3901 | 1291 | 30 |

**3d4.** Table 6. Torsion angles [°].

|                      |             |                         |             |
|----------------------|-------------|-------------------------|-------------|
| C(2)-C(1)-N(1)-C(11) | 163.44(15)  | C(11)-N(1)-C(8)-N(2)    | -131.79(15) |
| C(9)-C(1)-N(1)-C(11) | -12.8(2)    | C(1)-N(1)-C(8)-C(10)    | -75.36(18)  |
| C(2)-C(1)-N(1)-C(8)  | -16.8(2)    | C(11)-N(1)-C(8)-C(10)   | 104.39(17)  |
| C(9)-C(1)-N(1)-C(8)  | 166.92(14)  | C(1)-N(1)-C(11)-C(16)   | 95.85(18)   |
| N(1)-C(1)-C(2)-C(7)  | 175.55(15)  | C(8)-N(1)-C(11)-C(16)   | -83.87(18)  |
| C(9)-C(1)-C(2)-C(7)  | -8.2(2)     | C(1)-N(1)-C(11)-C(12)   | -139.18(16) |
| N(1)-C(1)-C(2)-C(3)  | -16.5(2)    | C(8)-N(1)-C(11)-C(12)   | 41.1(2)     |
| C(9)-C(1)-C(2)-C(3)  | 159.77(15)  | N(1)-C(11)-C(12)-C(13)  | 172.43(14)  |
| C(7)-C(2)-C(3)-N(2)  | -176.15(15) | C(16)-C(11)-C(12)-C(13) | -61.48(18)  |
| C(1)-C(2)-C(3)-N(2)  | 15.4(2)     | C(11)-C(12)-C(13)-C(14) | 59.37(19)   |
| C(7)-C(2)-C(3)-C(4)  | 5.4(2)      | C(12)-C(13)-C(14)-C(15) | -55.7(2)    |
| C(1)-C(2)-C(3)-C(4)  | -163.12(15) | C(13)-C(14)-C(15)-C(16) | 53.8(2)     |
| C(4)-C(3)-N(2)-C(8)  | -161.36(16) | N(1)-C(11)-C(16)-C(15)  | -175.37(14) |
| C(2)-C(3)-N(2)-C(8)  | 20.2(2)     | C(12)-C(11)-C(16)-C(15) | 58.94(19)   |
| N(2)-C(3)-C(4)-C(5)  | 176.77(17)  | C(14)-C(15)-C(16)-C(11) | -55.0(2)    |
| C(2)-C(3)-C(4)-C(5)  | -4.8(3)     | F(3)-C(99)-S(1)-O(1)    | -58.14(15)  |
| C(3)-C(4)-C(5)-C(6)  | 0.9(3)      | F(2)-C(99)-S(1)-O(1)    | -178.84(13) |
| C(4)-C(5)-C(6)-C(7)  | 2.5(3)      | F(1)-C(99)-S(1)-O(1)    | 61.81(15)   |
| C(5)-C(6)-C(7)-C(2)  | -1.8(3)     | F(3)-C(99)-S(1)-O(3)    | 62.80(15)   |
| C(3)-C(2)-C(7)-C(6)  | -2.0(2)     | F(2)-C(99)-S(1)-O(3)    | -57.91(15)  |
| C(1)-C(2)-C(7)-C(6)  | 165.78(16)  | F(1)-C(99)-S(1)-O(3)    | -177.25(13) |
| C(3)-N(2)-C(8)-N(1)  | -50.2(2)    | F(3)-C(99)-S(1)-O(2)    | -177.21(13) |
| C(3)-N(2)-C(8)-C(10) | 71.6(2)     | F(2)-C(99)-S(1)-O(2)    | 62.09(15)   |
| C(1)-N(1)-C(8)-N(2)  | 48.46(19)   | F(1)-C(99)-S(1)-O(2)    | -57.25(15)  |

**3d4.** Table 7. Hydrogen bonds [ $\text{\AA}$  and  $^\circ$ ].

| D-H...A             | d(D-H)  | d(H...A) | d(D...A)   | $\angle(\text{DHA})$ |
|---------------------|---------|----------|------------|----------------------|
| N(2)-H(02)...O(2)#1 | 0.83(2) | 2.05(2)  | 2.8663(19) | 170(2)               |
| C(8)-H(8)...O(3)#1  | 1.00    | 2.35     | 3.223(2)   | 144.9                |
| C(9)-H(9C)...O(1)#2 | 0.98    | 2.56     | 3.146(2)   | 118.7                |

Symmetry transformations used to generate equivalent atoms:

#1  $-x+1/2, y-1/2, -z+1/2$  #2  $-x+1, -y+1, -z$

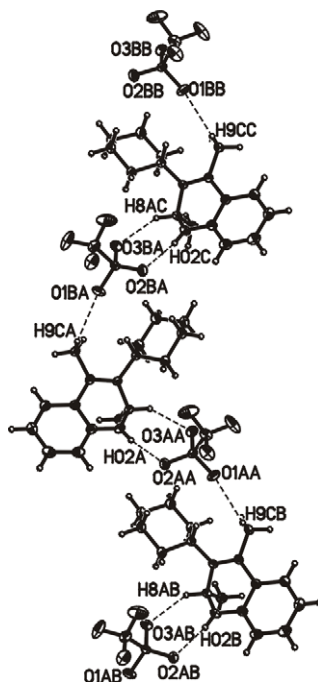

View of a chain formed by hydrogen bonds in **3d4**

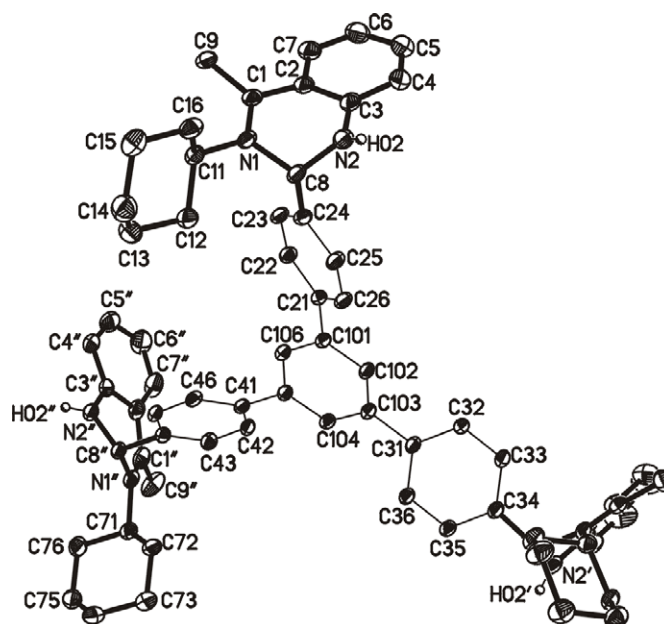

Thermal ellipsoid representation plot (30% probability) of the cation of complex **6d·2CHCl<sub>3</sub>·CH<sub>2</sub>Cl<sub>2</sub>**

Table 1. Crystal data and structure refinement of **6d**.

|                                   |                                                                                                             |                  |
|-----------------------------------|-------------------------------------------------------------------------------------------------------------|------------------|
| Identification code               | aiff                                                                                                        |                  |
| Empirical formula                 | C <sub>75</sub> H <sub>79</sub> Cl <sub>8</sub> F <sub>9</sub> N <sub>6</sub> O <sub>9</sub> S <sub>3</sub> |                  |
| Formula weight                    | 1759.22                                                                                                     |                  |
| Temperature                       | 100(2) K                                                                                                    |                  |
| Wavelength                        | 1.54184 Å                                                                                                   |                  |
| Crystal system                    | Triclinic                                                                                                   |                  |
| Space group                       | P -1                                                                                                        |                  |
| Unit cell dimensions              | a = 13.531(2) Å                                                                                             | α = 108.267(13)° |
|                                   | b = 17.185(2) Å                                                                                             | β = 106.724(13)° |
|                                   | c = 19.511(2) Å                                                                                             | γ = 101.091(14)° |
| Volume                            | 3921.8(8) Å <sup>3</sup>                                                                                    |                  |
| Z                                 | 2                                                                                                           |                  |
| Density (calculated)              | 1.490 Mg/m <sup>3</sup>                                                                                     |                  |
| Absorption coefficient            | 4.074 mm <sup>-1</sup>                                                                                      |                  |
| F(000)                            | 1816                                                                                                        |                  |
| Crystal size                      | 0.08 x 0.02 x 0.02 mm <sup>3</sup>                                                                          |                  |
| Theta range for data collection   | 3.55 to 75.82°                                                                                              |                  |
| Index ranges                      | -17 ≤ h ≤ 15, -20 ≤ k ≤ 21, -24 ≤ l ≤ 24                                                                    |                  |
| Reflections collected             | 83238                                                                                                       |                  |
| Independent reflections           | 16034 [R(int) = 0.0761]                                                                                     |                  |
| Completeness to theta = 72.50°    | 99.6 %                                                                                                      |                  |
| Absorption correction             | Semi-empirical from equivalents                                                                             |                  |
| Max. and min. transmission        | 1.00000 and 0.56041                                                                                         |                  |
| Refinement method                 | Full-matrix least-squares on F <sup>2</sup>                                                                 |                  |
| Data / restraints / parameters    | 16034 / 931 / 1031                                                                                          |                  |
| Goodness-of-fit on F <sup>2</sup> | 0.987                                                                                                       |                  |
| Final R indices [I > 2σ(I)]       | R1 = 0.0613, wR2 = 0.1666                                                                                   |                  |
| R indices (all data)              | R1 = 0.0942, wR2 = 0.1843                                                                                   |                  |
| Largest diff. peak and hole       | 1.115 and -1.195 e.Å <sup>-3</sup>                                                                          |                  |

**6d.** Table 2. Atomic coordinates ( $\times 10^4$ ) and equivalent isotropic displacement parameters ( $\text{\AA}^2 \times 10^3$ ).  $U(\text{eq})$  is defined as one third of the trace of the orthogonalized  $U_{ij}$  tensor.

|        | x        | y           | z          | U(eq)    |
|--------|----------|-------------|------------|----------|
| N(2)   | 1373(2)  | 1944.5(17)  | 566.2(14)  | 26.8(6)  |
| N(1)   | 2786(2)  | 2871.8(15)  | 424.2(13)  | 22.8(5)  |
| C(1)   | 2058(2)  | 3115.9(19)  | 4.7(16)    | 23.8(6)  |
| C(2)   | 988(3)   | 2965(2)     | 36.1(16)   | 25.7(6)  |
| C(3)   | 618(3)   | 2286(2)     | 254.4(16)  | 27.3(7)  |
| C(4)   | -490(3)  | 1968(2)     | 104.8(19)  | 34.5(8)  |
| C(5)   | -1185(3) | 2381(3)     | -175(2)    | 39.9(8)  |
| C(6)   | -814(3)  | 3098(2)     | -341(2)    | 37.5(8)  |
| C(7)   | 255(3)   | 3369(2)     | -252.4(18) | 32.0(7)  |
| C(8)   | 2483(3)  | 2474.9(19)  | 944.1(16)  | 23.7(6)  |
| C(9)   | 2274(3)  | 3472(2)     | -563.5(17) | 28.3(7)  |
| C(11)  | 3889(3)  | 2929(2)     | 395.5(17)  | 24.6(6)  |
| C(12)  | 4753(3)  | 3159(2)     | 1197.5(18) | 29.2(7)  |
| C(13)  | 5857(3)  | 3248(2)     | 1122(2)    | 35.7(8)  |
| C(14)  | 5854(3)  | 2418(3)     | 547(2)     | 39.4(8)  |
| C(15)  | 4966(3)  | 2152(2)     | -252(2)    | 36.9(8)  |
| C(16)  | 3857(3)  | 2089(2)     | -198.3(18) | 28.5(7)  |
| N(1')  | 1814(2)  | 2910.7(16)  | 7212.1(13) | 22.5(5)  |
| N(2')  | 2413(2)  | 4320.0(17)  | 8217.2(14) | 26.8(6)  |
| C(1')  | 795(3)   | 2858(2)     | 7107.0(17) | 25.5(6)  |
| C(2')  | 532(3)   | 3621(2)     | 7475.8(18) | 30.4(7)  |
| C(3')  | 1385(3)  | 4328(2)     | 8093.7(18) | 31.0(7)  |
| C(4')  | 1136(4)  | 4995(3)     | 8590(2)    | 43.3(9)  |
| C(5')  | 72(4)    | 4972(3)     | 8430(3)    | 56.9(11) |
| C(6')  | -764(4)  | 4308(3)     | 7799(3)    | 60.4(12) |
| C(7')  | -547(3)  | 3626(3)     | 7331(2)    | 43.7(9)  |
| C(8')  | 2661(3)  | 3770.7(19)  | 7607.1(16) | 23.6(6)  |
| C(9')  | -90(3)   | 2010(2)     | 6641(2)    | 33.7(7)  |
| N(1'') | 8086(2)  | 10209.0(16) | 7043.0(14) | 24.1(5)  |
| N(2'') | 7891(2)  | 9979.8(16)  | 5741.4(15) | 24.4(5)  |
| C(1'') | 7513(3)  | 10741(2)    | 7041(2)    | 31.3(7)  |
| C(2'') | 6869(3)  | 10746(2)    | 6309(2)    | 30.6(7)  |
| C(3'') | 7175(2)  | 10422(2)    | 5669.3(18) | 26.0(6)  |
| C(4'') | 6773(3)  | 10609(2)    | 5007(2)    | 32.5(7)  |
| C(5'') | 6013(3)  | 11026(3)    | 4959(2)    | 42.6(9)  |
| C(6'') | 5644(3)  | 11296(3)    | 5557(3)    | 48.0(10) |
| C(7'') | 6081(3)  | 11181(3)    | 6235(3)    | 43.0(9)  |
| C(8'') | 7979(2)  | 9573.5(18)  | 6286.7(16) | 21.7(6)  |
| C(9'') | 7604(4)  | 11405(2)    | 7789(2)    | 43.8(9)  |
| C(101) | 3487(2)  | 4898.9(18)  | 4091.3(15) | 18.9(6)  |
| C(102) | 3164(2)  | 4633.3(18)  | 4626.7(16) | 20.4(6)  |
| C(103) | 3547(2)  | 5177.4(18)  | 5406.1(15) | 18.3(5)  |
| C(104) | 4256(2)  | 6006.1(18)  | 5656.9(15) | 19.1(6)  |
| C(105) | 4587(2)  | 6287.7(17)  | 5138.1(15) | 18.3(5)  |
| C(106) | 4194(2)  | 5726.2(18)  | 4355.8(16) | 20.1(6)  |
| C(21)  | 3149(2)  | 4289.9(18)  | 3268.6(15) | 19.2(6)  |
| C(22)  | 3048(2)  | 4579.9(18)  | 2666.5(16) | 21.2(6)  |
| C(23)  | 2840(2)  | 4021.9(19)  | 1914.9(16) | 22.8(6)  |
| C(24)  | 2711(2)  | 3156.8(19)  | 1746.3(16) | 21.6(6)  |
| C(25)  | 2793(2)  | 2856.6(19)  | 2338.1(16) | 23.0(6)  |
| C(26)  | 3006(2)  | 3412.4(18)  | 3088.5(16) | 22.3(6)  |
| C(31)  | 3255(2)  | 4854.9(17)  | 5973.5(16) | 19.3(6)  |
| C(32)  | 2235(2)  | 4288.0(19)  | 5774.1(16) | 22.8(6)  |
| C(33)  | 2011(2)  | 3943(2)     | 6291.6(17) | 24.5(6)  |
| C(34)  | 2804(2)  | 4154.2(18)  | 7016.1(16) | 21.6(6)  |

|        |             |             |             |           |
|--------|-------------|-------------|-------------|-----------|
| C(35)  | 3812(2)     | 4727.9(19)  | 7222.6(16)  | 22.3(6)   |
| C(36)  | 4039(2)     | 5082.0(18)  | 6711.4(16)  | 21.1(6)   |
| C(41)  | 5405(2)     | 7148.3(17)  | 5418.9(15)  | 18.6(5)   |
| C(42)  | 5459(2)     | 7847.1(19)  | 6045.3(16)  | 21.4(6)   |
| C(43)  | 6264(2)     | 8640.1(19)  | 6337.5(17)  | 22.7(6)   |
| C(44)  | 7030(2)     | 8741.9(18)  | 5999.2(16)  | 20.4(6)   |
| C(45)  | 6971(2)     | 8049.4(19)  | 5367.7(16)  | 21.1(6)   |
| C(46)  | 6174(2)     | 7266.3(18)  | 5079.5(16)  | 20.6(6)   |
| C(61') | 2200(3)     | 2147(2)     | 6977.6(17)  | 25.2(6)   |
| C(62') | 3070(3)     | 2300(2)     | 6638(2)     | 32.5(7)   |
| C(63') | 3404(3)     | 1491(3)     | 6404(2)     | 38.9(8)   |
| C(64') | 3852(3)     | 1264(2)     | 7104(2)     | 37.5(8)   |
| C(65') | 3003(3)     | 1119(2)     | 7460.5(19)  | 32.6(7)   |
| C(66') | 2602(3)     | 1911(2)     | 7675.8(17)  | 26.6(6)   |
| C(71)  | 8904(3)     | 10212(2)    | 7758.7(17)  | 27.5(7)   |
| C(72)  | 8793(3)     | 9297(2)     | 7722.7(19)  | 31.5(7)   |
| C(73)  | 9672(3)     | 9301(3)     | 8420(2)     | 40.3(8)   |
| C(74)  | 10795(3)    | 9727(3)     | 8461(2)     | 44.4(9)   |
| C(75)  | 10912(3)    | 10641(3)    | 8528(2)     | 41.2(9)   |
| C(76)  | 10041(3)    | 10686(2)    | 7853.6(19)  | 34.8(8)   |
| S(1)   | 4268.7(6)   | 5641.8(5)   | 10736.9(4)  | 28.4(2)   |
| O(1)   | 4233(2)     | 4899.6(15)  | 10931.9(13) | 37.5(6)   |
| O(2)   | 5329.2(19)  | 6258.1(16)  | 11037.4(14) | 36.7(6)   |
| O(3)   | 3610(2)     | 5474.7(16)  | 9950.1(13)  | 38.5(6)   |
| C(97)  | 3564(3)     | 6194(2)     | 11300(2)    | 38.2(8)   |
| F(1)   | 4062(2)     | 6402.4(17)  | 12063.2(14) | 58.1(6)   |
| F(2)   | 2546.1(19)  | 5691.2(17)  | 11084.1(16) | 56.0(6)   |
| F(3)   | 3501(2)     | 6926.5(15)  | 11208.2(16) | 53.1(6)   |
| S(2)   | 9788.0(7)   | 10803.3(6)  | 4508.8(5)   | 35.8(2)   |
| O(4)   | 10878(2)    | 11165(2)    | 5083.2(15)  | 48.9(7)   |
| O(5)   | 9663(2)     | 10090.6(19) | 3829.1(16)  | 47.5(7)   |
| O(6)   | 8938(2)     | 10697.8(19) | 4801.4(16)  | 47.3(7)   |
| C(98)  | 9648(3)     | 11653(3)    | 4161(2)     | 47.9(10)  |
| F(4)   | 10369(3)    | 11805(2)    | 3830.0(17)  | 68.1(8)   |
| F(5)   | 9831(3)     | 12383.7(18) | 4739.5(19)  | 74.3(8)   |
| F(6)   | 8669(3)     | 11457(2)    | 3634.0(19)  | 81.9(9)   |
| S(3)   | 2943.1(8)   | 363.9(6)    | 994.1(6)    | 37.6(2)   |
| O(7)   | 3749(2)     | 1201.0(16)  | 1420.6(16)  | 43.4(6)   |
| O(8)   | 1933(2)     | 361.2(17)   | 479.9(18)   | 47.7(7)   |
| O(9)   | 2832(3)     | -154(2)     | 1427(2)     | 60.2(9)   |
| C(99)  | 3517(3)     | -214(2)     | 330(3)      | 41.8(9)   |
| F(7)   | 4457(2)     | -269.4(17)  | 720.1(18)   | 63.6(7)   |
| F(8)   | 2856(2)     | -1005.7(14) | -128.8(17)  | 58.9(7)   |
| F(9)   | 3690(3)     | 186.6(16)   | -124.6(17)  | 63.1(7)   |
| C(81)  | 1553(5)     | -3921(3)    | 4466(3)     | 44.3(13)  |
| Cl(1)  | 2223.3(12)  | -2825.5(9)  | 4738.6(9)   | 48.8(5)   |
| Cl(2)  | 1057.6(14)  | -4123.2(10) | 5153.6(10)  | 59.8(6)   |
| C(81') | 1760(20)    | -3557(17)   | 5226(14)    | 116(9)    |
| Cl(1') | 2360(20)    | -2769(17)   | 4959(19)    | 296(12)   |
| Cl(2') | 660(8)      | -4314(6)    | 4398(6)     | 124(3)    |
| C(82)  | 6157(4)     | -8535(3)    | 2377(3)     | 50.2(10)  |
| Cl(3)  | 6657.6(11)  | -7438.1(8)  | 2960.1(9)   | 70.3(4)   |
| Cl(4)  | 5940.3(13)  | -9161.4(9)  | 2901.8(9)   | 71.0(4)   |
| Cl(5)  | 7018.1(11)  | -8843.9(10) | 1903.6(7)   | 71.8(4)   |
| C(83)  | 9191(5)     | 3377(4)     | 2775(4)     | 49.9(15)  |
| Cl(6)  | 8735.8(14)  | 4274.3(11)  | 2964.4(10)  | 45.4(5)   |
| Cl(7)  | 10557.2(16) | 3681.8(18)  | 3333.0(19)  | 101.8(11) |
| Cl(8)  | 9036(4)     | 2929.6(16)  | 1788.8(12)  | 118.9(15) |
| C(83') | 9180(20)    | 3204(19)    | 2554(13)    | 160(13)   |
| Cl(6') | 8863(16)    | 4160(13)    | 2888(12)    | 223(8)    |

|        |           |          |          |         |
|--------|-----------|----------|----------|---------|
| Cl(7') | 10181(7)  | 3173(6)  | 3346(5)  | 115(3)  |
| Cl(8') | 10020(30) | 3193(19) | 2027(16) | 360(14) |

**6d.** Table 3. Bond lengths [ $\text{\AA}$ ] and angles [ $^\circ$ ].

|               |          |               |          |
|---------------|----------|---------------|----------|
| N(2)-C(3)     | 1.362(5) | C(104)-C(105) | 1.394(4) |
| N(2)-C(8)     | 1.430(4) | C(105)-C(106) | 1.398(4) |
| N(1)-C(1)     | 1.314(4) | C(105)-C(41)  | 1.492(4) |
| N(1)-C(8)     | 1.492(4) | C(21)-C(22)   | 1.396(4) |
| N(1)-C(11)    | 1.495(4) | C(21)-C(26)   | 1.397(4) |
| C(1)-C(2)     | 1.443(5) | C(22)-C(23)   | 1.388(4) |
| C(1)-C(9)     | 1.494(4) | C(23)-C(24)   | 1.382(4) |
| C(2)-C(7)     | 1.404(5) | C(24)-C(25)   | 1.391(4) |
| C(2)-C(3)     | 1.416(4) | C(25)-C(26)   | 1.383(4) |
| C(3)-C(4)     | 1.402(5) | C(31)-C(32)   | 1.394(4) |
| C(4)-C(5)     | 1.374(6) | C(31)-C(36)   | 1.400(4) |
| C(5)-C(6)     | 1.408(5) | C(32)-C(33)   | 1.395(4) |
| C(6)-C(7)     | 1.373(5) | C(33)-C(34)   | 1.391(4) |
| C(8)-C(24)    | 1.534(4) | C(34)-C(35)   | 1.383(4) |
| C(11)-C(16)   | 1.525(4) | C(35)-C(36)   | 1.395(4) |
| C(11)-C(12)   | 1.534(4) | C(41)-C(42)   | 1.392(4) |
| C(12)-C(13)   | 1.526(5) | C(41)-C(46)   | 1.401(4) |
| C(13)-C(14)   | 1.512(5) | C(42)-C(43)   | 1.398(4) |
| C(14)-C(15)   | 1.533(5) | C(43)-C(44)   | 1.392(4) |
| C(15)-C(16)   | 1.520(5) | C(44)-C(45)   | 1.389(4) |
| N(1')-C(1')   | 1.315(4) | C(45)-C(46)   | 1.382(4) |
| N(1')-C(8')   | 1.489(4) | C(61')-C(66') | 1.523(4) |
| N(1')-C(61')  | 1.494(4) | C(61')-C(62') | 1.528(5) |
| N(2')-C(3')   | 1.345(5) | C(62')-C(63') | 1.520(5) |
| N(2')-C(8')   | 1.438(4) | C(63')-C(64') | 1.527(5) |
| C(1')-C(2')   | 1.448(5) | C(64')-C(65') | 1.524(5) |
| C(1')-C(9')   | 1.502(4) | C(65')-C(66') | 1.542(5) |
| C(2')-C(7')   | 1.408(5) | C(71)-C(76)   | 1.525(5) |
| C(2')-C(3')   | 1.415(5) | C(71)-C(72)   | 1.529(5) |
| C(3')-C(4')   | 1.415(5) | C(72)-C(73)   | 1.525(5) |
| C(4')-C(5')   | 1.373(7) | C(73)-C(74)   | 1.522(5) |
| C(5')-C(6')   | 1.385(7) | C(74)-C(75)   | 1.509(6) |
| C(6')-C(7')   | 1.382(6) | C(75)-C(76)   | 1.527(5) |
| C(8')-C(34)   | 1.535(4) | S(1)-O(1)     | 1.437(2) |
| N(1'')-C(1'') | 1.307(5) | S(1)-O(2)     | 1.438(2) |
| N(1'')-C(8'') | 1.482(4) | S(1)-O(3)     | 1.439(2) |
| N(1'')-C(71)  | 1.509(4) | S(1)-C(97)    | 1.821(4) |
| N(2'')-C(3'') | 1.343(4) | C(97)-F(3)    | 1.340(4) |
| N(2'')-C(8'') | 1.435(4) | C(97)-F(1)    | 1.341(5) |
| C(1'')-C(2'') | 1.448(5) | C(97)-F(2)    | 1.342(4) |
| C(1'')-C(9'') | 1.498(5) | S(2)-O(6)     | 1.430(3) |
| C(2'')-C(3'') | 1.412(5) | S(2)-O(5)     | 1.436(3) |
| C(2'')-C(7'') | 1.415(5) | S(2)-O(4)     | 1.441(3) |
| C(3'')-C(4'') | 1.412(4) | S(2)-C(98)    | 1.811(5) |
| C(4'')-C(5'') | 1.361(6) | C(98)-F(5)    | 1.321(5) |
| C(5'')-C(6'') | 1.382(6) | C(98)-F(6)    | 1.324(5) |
| C(6'')-C(7'') | 1.378(6) | C(98)-F(4)    | 1.344(5) |
| C(8'')-C(44)  | 1.543(4) | S(3)-O(9)     | 1.421(3) |
| C(101)-C(106) | 1.391(4) | S(3)-O(7)     | 1.440(3) |
| C(101)-C(102) | 1.405(4) | S(3)-O(8)     | 1.442(3) |
| C(101)-C(21)  | 1.490(4) | S(3)-C(99)    | 1.827(4) |
| C(102)-C(103) | 1.387(4) | C(99)-F(7)    | 1.320(5) |
| C(103)-C(104) | 1.398(4) | C(99)-F(9)    | 1.325(5) |
| C(103)-C(31)  | 1.497(4) | C(99)-F(8)    | 1.326(5) |



|                    |           |                      |          |
|--------------------|-----------|----------------------|----------|
| C(81)-Cl(1)        | 1.757(5)  | N(2')-C(8')-C(34)    | 113.8(3) |
| C(81)-Cl(2)        | 1.759(5)  | N(1')-C(8')-C(34)    | 111.0(2) |
| C(81')-Cl(1')      | 1.740(16) | C(1'')-N(1'')-C(8'') | 118.5(3) |
| C(81')-Cl(2')      | 1.751(16) | C(1'')-N(1'')-C(71)  | 125.2(3) |
| C(82)-Cl(3)        | 1.740(5)  | C(8'')-N(1'')-C(71)  | 116.2(3) |
| C(82)-Cl(4)        | 1.743(5)  | C(3'')-N(2'')-C(8'') | 118.7(3) |
| C(82)-Cl(5)        | 1.744(5)  | N(1'')-C(1'')-C(2'') | 119.6(3) |
| C(83)-Cl(7)        | 1.729(6)  | N(1'')-C(1'')-C(9'') | 120.7(3) |
| C(83)-Cl(6)        | 1.741(6)  | C(2'')-C(1'')-C(9'') | 119.4(3) |
| C(83)-Cl(8)        | 1.766(7)  | C(3'')-C(2'')-C(7'') | 118.4(3) |
| C(83')-Cl(8')      | 1.738(15) | C(3'')-C(2'')-C(1'') | 117.2(3) |
| C(83')-Cl(6')      | 1.751(15) | C(7'')-C(2'')-C(1'') | 123.5(3) |
| C(83')-Cl(7')      | 1.761(15) | N(2'')-C(3'')-C(4'') | 122.9(3) |
|                    |           | N(2'')-C(3'')-C(2'') | 117.4(3) |
| C(3)-N(2)-C(8)     | 118.2(3)  | C(4'')-C(3'')-C(2'') | 119.6(3) |
| C(1)-N(1)-C(8)     | 118.2(3)  | C(5'')-C(4'')-C(3'') | 119.7(3) |
| C(1)-N(1)-C(11)    | 124.6(2)  | C(4'')-C(5'')-C(6'') | 121.5(3) |
| C(8)-N(1)-C(11)    | 117.1(2)  | C(7'')-C(6'')-C(5'') | 120.1(4) |
| N(1)-C(1)-C(2)     | 119.6(3)  | C(6'')-C(7'')-C(2'') | 120.3(4) |
| N(1)-C(1)-C(9)     | 121.5(3)  | N(2'')-C(8'')-N(1'') | 108.7(2) |
| C(2)-C(1)-C(9)     | 118.6(3)  | N(2'')-C(8'')-C(44)  | 113.3(2) |
| C(7)-C(2)-C(3)     | 119.1(3)  | N(1'')-C(8'')-C(44)  | 111.7(2) |
| C(7)-C(2)-C(1)     | 122.6(3)  | C(106)-C(101)-C(102) | 118.7(2) |
| C(3)-C(2)-C(1)     | 117.6(3)  | C(106)-C(101)-C(21)  | 120.2(2) |
| N(2)-C(3)-C(4)     | 123.4(3)  | C(102)-C(101)-C(21)  | 121.0(2) |
| N(2)-C(3)-C(2)     | 116.8(3)  | C(103)-C(102)-C(101) | 121.1(2) |
| C(4)-C(3)-C(2)     | 119.7(3)  | C(102)-C(103)-C(104) | 119.1(2) |
| C(5)-C(4)-C(3)     | 119.4(3)  | C(102)-C(103)-C(31)  | 119.9(2) |
| C(4)-C(5)-C(6)     | 121.4(3)  | C(104)-C(103)-C(31)  | 120.9(2) |
| C(7)-C(6)-C(5)     | 119.3(4)  | C(105)-C(104)-C(103) | 121.1(2) |
| C(6)-C(7)-C(2)     | 120.8(3)  | C(104)-C(105)-C(106) | 118.8(2) |
| N(2)-C(8)-N(1)     | 109.3(2)  | C(104)-C(105)-C(41)  | 120.8(2) |
| N(2)-C(8)-C(24)    | 112.3(3)  | C(106)-C(105)-C(41)  | 120.3(2) |
| N(1)-C(8)-C(24)    | 111.8(2)  | C(101)-C(106)-C(105) | 121.3(2) |
| N(1)-C(11)-C(16)   | 110.0(2)  | C(22)-C(21)-C(26)    | 117.9(3) |
| N(1)-C(11)-C(12)   | 112.2(2)  | C(22)-C(21)-C(101)   | 121.6(3) |
| C(16)-C(11)-C(12)  | 111.2(3)  | C(26)-C(21)-C(101)   | 120.3(2) |
| C(13)-C(12)-C(11)  | 108.7(3)  | C(23)-C(22)-C(21)    | 121.4(3) |
| C(14)-C(13)-C(12)  | 110.8(3)  | C(24)-C(23)-C(22)    | 120.1(3) |
| C(13)-C(14)-C(15)  | 111.0(3)  | C(23)-C(24)-C(25)    | 119.1(3) |
| C(16)-C(15)-C(14)  | 111.6(3)  | C(23)-C(24)-C(8)     | 125.3(3) |
| C(15)-C(16)-C(11)  | 110.4(3)  | C(25)-C(24)-C(8)     | 115.5(3) |
| C(1')-N(1')-C(8')  | 119.7(3)  | C(26)-C(25)-C(24)    | 120.9(3) |
| C(1')-N(1')-C(61') | 123.9(2)  | C(25)-C(26)-C(21)    | 120.6(3) |
| C(8')-N(1')-C(61') | 116.4(2)  | C(32)-C(31)-C(36)    | 118.3(2) |
| C(3')-N(2')-C(8')  | 120.0(3)  | C(32)-C(31)-C(103)   | 121.8(2) |
| N(1')-C(1')-C(2')  | 119.4(3)  | C(36)-C(31)-C(103)   | 119.8(2) |
| N(1')-C(1')-C(9')  | 120.8(3)  | C(31)-C(32)-C(33)    | 120.7(3) |
| C(2')-C(1')-C(9')  | 119.7(3)  | C(34)-C(33)-C(32)    | 120.7(3) |
| C(7')-C(2')-C(3')  | 119.1(3)  | C(35)-C(34)-C(33)    | 118.9(3) |
| C(7')-C(2')-C(1')  | 122.1(3)  | C(35)-C(34)-C(8')    | 116.4(2) |
| C(3')-C(2')-C(1')  | 117.9(3)  | C(33)-C(34)-C(8')    | 124.7(3) |
| N(2')-C(3')-C(2')  | 118.4(3)  | C(34)-C(35)-C(36)    | 120.8(3) |
| N(2')-C(3')-C(4')  | 121.9(3)  | C(35)-C(36)-C(31)    | 120.6(3) |
| C(2')-C(3')-C(4')  | 119.6(4)  | C(42)-C(41)-C(46)    | 118.0(2) |
| C(5')-C(4')-C(3')  | 119.2(4)  | C(42)-C(41)-C(105)   | 121.2(3) |
| C(4')-C(5')-C(6')  | 121.6(4)  | C(46)-C(41)-C(105)   | 120.8(3) |
| C(7')-C(6')-C(5')  | 120.3(4)  | C(41)-C(42)-C(43)    | 121.3(3) |
| C(6')-C(7')-C(2')  | 120.0(4)  | C(44)-C(43)-C(42)    | 119.9(3) |
| N(2')-C(8')-N(1')  | 109.6(2)  | C(45)-C(44)-C(43)    | 119.0(3) |

|                      |            |                      |            |
|----------------------|------------|----------------------|------------|
| C(45)-C(44)-C(8'')   | 116.3(3)   | O(5)-S(2)-O(4)       | 113.44(19) |
| C(43)-C(44)-C(8'')   | 124.7(3)   | O(6)-S(2)-C(98)      | 103.7(2)   |
| C(46)-C(45)-C(44)    | 121.0(3)   | O(5)-S(2)-C(98)      | 103.59(19) |
| C(45)-C(46)-C(41)    | 120.8(3)   | O(4)-S(2)-C(98)      | 102.29(19) |
| N(1')-C(61')-C(66')  | 109.0(2)   | F(5)-C(98)-F(6)      | 108.2(4)   |
| N(1')-C(61')-C(62')  | 112.2(2)   | F(5)-C(98)-F(4)      | 106.9(4)   |
| C(66')-C(61')-C(62') | 111.7(3)   | F(6)-C(98)-F(4)      | 107.3(4)   |
| C(63')-C(62')-C(61') | 108.8(3)   | F(5)-C(98)-S(2)      | 111.0(3)   |
| C(62')-C(63')-C(64') | 111.0(3)   | F(6)-C(98)-S(2)      | 112.1(3)   |
| C(65')-C(64')-C(63') | 110.5(3)   | F(4)-C(98)-S(2)      | 111.1(3)   |
| C(64')-C(65')-C(66') | 110.8(3)   | O(9)-S(3)-O(7)       | 115.8(2)   |
| C(61')-C(66')-C(65') | 110.9(3)   | O(9)-S(3)-O(8)       | 114.8(2)   |
| N(1'')-C(71)-C(76)   | 109.2(2)   | O(7)-S(3)-O(8)       | 114.37(16) |
| N(1'')-C(71)-C(72)   | 111.2(2)   | O(9)-S(3)-C(99)      | 102.59(18) |
| C(76)-C(71)-C(72)    | 112.3(3)   | O(7)-S(3)-C(99)      | 103.24(17) |
| C(73)-C(72)-C(71)    | 110.8(3)   | O(8)-S(3)-C(99)      | 103.53(19) |
| C(74)-C(73)-C(72)    | 110.6(3)   | F(7)-C(99)-F(9)      | 107.4(3)   |
| C(75)-C(74)-C(73)    | 110.1(3)   | F(7)-C(99)-F(8)      | 108.4(3)   |
| C(74)-C(75)-C(76)    | 112.1(3)   | F(9)-C(99)-F(8)      | 107.4(4)   |
| C(71)-C(76)-C(75)    | 111.6(3)   | F(7)-C(99)-S(3)      | 110.8(3)   |
| O(1)-S(1)-O(2)       | 115.11(16) | F(9)-C(99)-S(3)      | 111.3(3)   |
| O(1)-S(1)-O(3)       | 115.77(15) | F(8)-C(99)-S(3)      | 111.4(3)   |
| O(2)-S(1)-O(3)       | 115.05(15) | Cl(1)-C(81)-Cl(2)    | 113.4(3)   |
| O(1)-S(1)-C(97)      | 101.61(17) | Cl(1')-C(81')-Cl(2') | 107.3(16)  |
| O(2)-S(1)-C(97)      | 103.66(16) | Cl(3)-C(82)-Cl(4)    | 112.1(2)   |
| O(3)-S(1)-C(97)      | 102.84(18) | Cl(3)-C(82)-Cl(5)    | 110.9(3)   |
| F(3)-C(97)-F(1)      | 107.1(3)   | Cl(4)-C(82)-Cl(5)    | 110.6(3)   |
| F(3)-C(97)-F(2)      | 107.5(3)   | Cl(7)-C(83)-Cl(6)    | 109.5(4)   |
| F(1)-C(97)-F(2)      | 107.3(3)   | Cl(7)-C(83)-Cl(8)    | 107.6(4)   |
| F(3)-C(97)-S(1)      | 112.3(3)   | Cl(6)-C(83)-Cl(8)    | 110.9(3)   |
| F(1)-C(97)-S(1)      | 111.7(3)   | Cl(8')-C(83')-Cl(6') | 116.4(19)  |
| F(2)-C(97)-S(1)      | 110.7(3)   | Cl(8')-C(83')-Cl(7') | 92.6(14)   |
| O(6)-S(2)-O(5)       | 115.55(17) | Cl(6')-C(83')-Cl(7') | 107.8(15)  |
| O(6)-S(2)-O(4)       | 115.87(17) |                      |            |

**6d.** Table 4. Anisotropic displacement parameters ( $\text{\AA}^2 \times 10^3$ ). The anisotropic displacement factor exponent takes the form:  $-2\pi^2 [h^2 a^{*2} U^{11} + \dots + 2 h k a^* b^* U^{12}]$

|       | U <sup>11</sup> | U <sup>22</sup> | U <sup>33</sup> | U <sup>23</sup> | U <sup>13</sup> | U <sup>12</sup> |
|-------|-----------------|-----------------|-----------------|-----------------|-----------------|-----------------|
| N(2)  | 32.4(14)        | 20.7(13)        | 20.1(12)        | 6.3(10)         | 7.3(10)         | 0.0(11)         |
| N(1)  | 29.3(13)        | 21.2(12)        | 15.4(11)        | 7.1(9)          | 8.5(10)         | 2.6(10)         |
| C(1)  | 28.6(15)        | 20.9(14)        | 14.0(12)        | 3.4(11)         | 5.0(11)         | 1.4(12)         |
| C(2)  | 29.4(15)        | 24.9(14)        | 15.1(13)        | 4.1(11)         | 6.0(11)         | 2.0(12)         |
| C(3)  | 32.4(16)        | 27.2(15)        | 15.5(13)        | 3.9(11)         | 9.2(12)         | 2.1(13)         |
| C(4)  | 31.0(17)        | 37.9(18)        | 24.7(15)        | 8.2(14)         | 8.0(13)         | 0.2(14)         |
| C(5)  | 29.7(17)        | 51(2)           | 31.3(17)        | 13.3(16)        | 8.2(14)         | 5.2(15)         |
| C(6)  | 32.3(17)        | 44(2)           | 30.4(17)        | 11.7(15)        | 6.9(14)         | 10.5(15)        |
| C(7)  | 34.9(17)        | 30.8(16)        | 21.8(15)        | 6.3(13)         | 6.8(13)         | 4.8(13)         |
| C(8)  | 29.9(15)        | 23.1(14)        | 16.8(13)        | 9.4(11)         | 8.9(11)         | 2.7(12)         |
| C(9)  | 32.4(16)        | 30.9(16)        | 18.1(14)        | 11.4(12)        | 6.3(12)         | 3.8(13)         |
| C(11) | 27.9(15)        | 25.5(15)        | 20.6(14)        | 10.8(12)        | 9.9(12)         | 4.9(12)         |
| C(12) | 30.1(16)        | 29.7(16)        | 21.6(14)        | 9.2(12)         | 7.0(12)         | 1.8(13)         |
| C(13) | 28.5(16)        | 37.4(18)        | 35.3(18)        | 16.6(15)        | 5.8(14)         | 2.9(14)         |
| C(14) | 36.4(19)        | 45(2)           | 44(2)           | 21.8(17)        | 17.6(16)        | 16.6(16)        |
| C(15) | 44(2)           | 39.8(19)        | 36.0(18)        | 17.4(15)        | 22.1(15)        | 16.9(16)        |
| C(16) | 38.2(17)        | 23.6(15)        | 19.7(14)        | 6.8(12)         | 9.9(13)         | 5.2(13)         |
| N(1') | 26.1(13)        | 23.6(12)        | 16.6(11)        | 9.9(9)          | 7.9(9)          | 1.7(10)         |
| N(2') | 35.7(15)        | 25.5(13)        | 15.6(12)        | 8.4(10)         | 9.1(11)         | 2.1(11)         |

|         |          |          |          |          |          |          |
|---------|----------|----------|----------|----------|----------|----------|
| C(1')   | 28.3(15) | 31.9(16) | 17.8(13) | 13.2(12) | 9.4(12)  | 5.7(12)  |
| C(2')   | 36.9(17) | 36.7(17) | 21.7(14) | 14.7(13) | 12.1(13) | 12.7(14) |
| C(3')   | 46.1(19) | 32.2(16) | 20.4(14) | 14.2(13) | 15.1(13) | 13.9(14) |
| C(4')   | 63(2)    | 41(2)    | 30.3(18) | 12.7(15) | 20.2(17) | 23.3(18) |
| C(5')   | 76(3)    | 59(3)    | 40(2)    | 11.8(19) | 23(2)    | 41(2)    |
| C(6')   | 55(3)    | 79(3)    | 54(3)    | 21(2)    | 22(2)    | 42(2)    |
| C(7')   | 42(2)    | 58(2)    | 33.6(18) | 16.0(17) | 13.1(16) | 25.0(18) |
| C(8')   | 29.0(15) | 22.3(14) | 15.3(13) | 8.4(11)  | 6.9(11)  | -0.7(12) |
| C(9')   | 27.2(16) | 35.9(18) | 30.1(16) | 10.5(14) | 9.0(13)  | -0.3(14) |
| N(1'')  | 29.1(13) | 20.5(12) | 21.4(12) | 8.4(10)  | 10.8(10) | 2.3(10)  |
| N(2'')  | 25.3(13) | 25.6(13) | 22.0(12) | 10.8(10) | 9.8(10)  | 2.9(10)  |
| C(1''') | 40.9(18) | 22.8(15) | 34.7(17) | 13.2(13) | 20.4(14) | 6.5(13)  |
| C(2''') | 32.0(17) | 29.9(16) | 38.6(17) | 20.4(14) | 18.1(14) | 9.1(13)  |
| C(3''') | 22.7(14) | 25.2(15) | 28.3(15) | 13.2(12) | 8.6(12)  | 0.5(12)  |
| C(4''') | 30.5(17) | 37.9(18) | 35.1(17) | 22.9(15) | 13.3(14) | 7.4(14)  |
| C(5''') | 42(2)    | 53(2)    | 48(2)    | 35.3(19) | 18.2(17) | 18.3(17) |
| C(6''') | 44(2)    | 58(2)    | 69(3)    | 44(2)    | 28(2)    | 30.5(19) |
| C(7''') | 47(2)    | 47(2)    | 59(2)    | 34.4(19) | 34.3(19) | 24.1(18) |
| C(8''') | 24.2(14) | 20.9(13) | 20.0(13) | 9.2(11)  | 9.5(11)  | 3.1(11)  |
| C(9''') | 75(3)    | 31.9(18) | 38.7(19) | 16.0(15) | 34(2)    | 23.6(19) |
| C(101)  | 20.5(13) | 20.8(13) | 14.2(12) | 8.2(10)  | 5.5(10)  | 2.9(11)  |
| C(102)  | 23.9(14) | 19.4(13) | 16.7(13) | 9.0(11)  | 7.4(11)  | 1.1(11)  |
| C(103)  | 20.5(13) | 20.6(13) | 16.5(12) | 9.3(11)  | 8.8(11)  | 5.8(11)  |
| C(104)  | 21.6(14) | 20.1(13) | 13.5(12) | 6.0(10)  | 6.5(10)  | 3.3(11)  |
| C(105)  | 20.3(13) | 18.4(13) | 16.4(12) | 8.0(10)  | 7.2(10)  | 3.8(11)  |
| C(106)  | 21.6(14) | 22.4(13) | 17.1(13) | 10.5(11) | 7.3(11)  | 3.7(11)  |
| C(21)   | 18.9(13) | 22.8(13) | 12.8(12) | 6.7(10)  | 5.1(10)  | 1.6(11)  |
| C(22)   | 25.8(14) | 17.8(13) | 16.5(13) | 7.1(10)  | 6.0(11)  | 1.8(11)  |
| C(23)   | 28.5(15) | 23.4(14) | 15.2(13) | 10.4(11) | 6.7(11)  | 2.6(12)  |
| C(24)   | 24.2(14) | 22.2(14) | 15.2(12) | 8.2(11)  | 4.8(11)  | 2.7(11)  |
| C(25)   | 30.9(16) | 19.4(13) | 15.9(13) | 7.8(11)  | 7.8(11)  | 1.3(12)  |
| C(26)   | 27.5(15) | 21.5(14) | 15.1(13) | 8.9(11)  | 6.2(11)  | 1.2(12)  |
| C(31)   | 23.7(14) | 17.8(13) | 16.8(12) | 8.1(10)  | 8.7(11)  | 3.6(11)  |
| C(32)   | 21.2(14) | 27.8(15) | 16.4(13) | 10.5(11) | 5.4(11)  | 0.8(12)  |
| C(33)   | 24.9(15) | 27.2(15) | 19.6(13) | 11.3(12) | 8.6(11)  | 0.2(12)  |
| C(34)   | 24.9(14) | 22.0(14) | 16.5(13) | 8.7(11)  | 7.7(11)  | 2.3(11)  |
| C(35)   | 25.8(14) | 23.1(14) | 13.6(12) | 6.6(11)  | 6.2(11)  | 0.9(11)  |
| C(36)   | 24.1(14) | 20.6(13) | 15.0(12) | 6.7(11)  | 7.0(11)  | 0.2(11)  |
| C(41)   | 21.5(14) | 18.7(13) | 15.4(12) | 8.9(10)  | 5.8(10)  | 3.5(11)  |
| C(42)   | 22.5(14) | 22.9(14) | 18.3(13) | 8.9(11)  | 9.1(11)  | 2.0(11)  |
| C(43)   | 26.6(15) | 19.9(13) | 20.7(13) | 7.8(11)  | 9.7(11)  | 4.6(11)  |
| C(44)   | 20.8(13) | 20.0(13) | 19.2(13) | 9.1(11)  | 6.7(11)  | 3.0(11)  |
| C(45)   | 22.5(14) | 23.8(14) | 18.7(13) | 10.9(11) | 9.6(11)  | 3.4(11)  |
| C(46)   | 26.6(15) | 20.0(13) | 14.7(12) | 6.9(10)  | 8.8(11)  | 4.8(11)  |
| C(61')  | 27.9(15) | 24.3(14) | 18.5(13) | 6.8(11)  | 6.9(12)  | 3.0(12)  |
| C(62')  | 38.4(18) | 38.9(18) | 30.5(16) | 21.1(14) | 17.9(14) | 14.2(15) |
| C(63')  | 48(2)    | 51(2)    | 32.1(18) | 20.8(16) | 22.2(16) | 26.1(18) |
| C(64')  | 41(2)    | 40.8(19) | 37.2(18) | 17.8(15) | 16.6(15) | 20.1(16) |
| C(65')  | 40.7(19) | 26.3(16) | 28.7(16) | 11.9(13) | 10.4(14) | 8.2(14)  |
| C(66')  | 30.9(16) | 25.9(15) | 23.0(14) | 12.5(12) | 10.1(12) | 3.5(12)  |
| C(71)   | 29.1(16) | 30.3(16) | 19.0(14) | 8.7(12)  | 8.1(12)  | 3.2(13)  |
| C(72)   | 32.6(17) | 33.8(17) | 26.1(16) | 17.1(13) | 6.1(13)  | 4.4(14)  |
| C(73)   | 39.6(19) | 49(2)    | 35.7(18) | 25.7(17) | 10.9(15) | 10.6(16) |
| C(74)   | 34.9(19) | 71(3)    | 31.1(18) | 27.5(18) | 10.2(15) | 16.6(18) |
| C(75)   | 31.9(18) | 53(2)    | 23.0(16) | 11.4(15) | 4.9(13)  | -5.4(16) |
| C(76)   | 33.8(17) | 33.7(17) | 25.7(16) | 8.4(13)  | 8.6(13)  | -4.1(14) |
| S(1)    | 30.7(4)  | 26.0(4)  | 23.3(4)  | 11.3(3)  | 4.6(3)   | 3.3(3)   |
| O(1)    | 51.0(15) | 28.4(12) | 29.1(12) | 15.5(10) | 7.6(11)  | 7.8(11)  |
| O(2)    | 26.8(12) | 36.2(13) | 37.8(13) | 14.3(10) | 4.2(10)  | 2.4(10)  |
| O(3)    | 42.6(14) | 36.5(13) | 24.9(11) | 15.7(10) | 0.0(10)  | 0.9(11)  |

|       |          |           |          |          |          |          |
|-------|----------|-----------|----------|----------|----------|----------|
| C(97) | 34.8(19) | 38.4(19)  | 43(2)    | 17.8(16) | 15.1(16) | 9.2(15)  |
| F(1)  | 72.5(17) | 64.0(16)  | 39.0(12) | 16.1(11) | 25.1(12) | 24.3(13) |
| F(2)  | 39.1(13) | 61.1(15)  | 81.4(18) | 39.9(14) | 30.0(12) | 13.1(11) |
| F(3)  | 56.1(15) | 42.6(12)  | 73.1(16) | 27.1(12) | 31.9(13) | 22.8(11) |
| S(2)  | 27.5(4)  | 46.9(5)   | 27.1(4)  | 10.3(4)  | 10.3(3)  | 6.2(4)   |
| O(4)  | 28.8(13) | 72.6(19)  | 36.1(14) | 24.3(13) | 6.5(11)  | -0.2(13) |
| O(5)  | 50.0(16) | 51.3(16)  | 38.4(14) | 9.2(12)  | 22.4(12) | 15.2(13) |
| O(6)  | 34.0(14) | 53.6(16)  | 44.0(15) | 7.9(12)  | 20.7(12) | 1.3(12)  |
| C(98) | 42(2)    | 55(2)     | 42(2)    | 15.4(19) | 13.9(17) | 15.3(19) |
| F(4)  | 84(2)    | 81.7(19)  | 71.9(18) | 51.9(16) | 43.7(16) | 37.9(16) |
| F(5)  | 85(2)    | 51.1(16)  | 79(2)    | 11.7(14) | 33.5(17) | 24.3(15) |
| F(6)  | 60.5(18) | 95(2)     | 79(2)    | 40.4(18) | -1.2(15) | 31.7(16) |
| S(3)  | 41.7(5)  | 30.0(4)   | 50.8(5)  | 19.7(4)  | 25.5(4)  | 13.0(4)  |
| O(7)  | 44.6(15) | 32.7(13)  | 50.7(15) | 16.2(12) | 13.9(12) | 13.5(11) |
| O(8)  | 36.5(14) | 33.6(13)  | 67.1(18) | 12.5(13) | 18.4(13) | 11.9(11) |
| O(9)  | 84(2)    | 54.4(18)  | 81(2)    | 45.4(17) | 56(2)    | 34.6(17) |
| C(99) | 41(2)    | 33.1(19)  | 60(2)    | 21.0(17) | 26.1(18) | 13.5(16) |
| F(7)  | 52.7(15) | 55.5(15)  | 89(2)    | 23.3(14) | 33.3(14) | 29.3(12) |
| F(8)  | 62.0(16) | 31.0(11)  | 79.7(18) | 9.6(11)  | 37.9(14) | 8.5(11)  |
| F(9)  | 92(2)    | 47.7(14)  | 78.0(18) | 31.3(13) | 60.7(17) | 26.9(14) |
| C(81) | 44(3)    | 40(3)     | 54(3)    | 23(2)    | 22(2)    | 12(2)    |
| Cl(1) | 50.3(8)  | 40.8(7)   | 51.6(8)  | 24.2(6)  | 14.5(6)  | 3.1(5)   |
| Cl(2) | 71.0(11) | 53.7(9)   | 73.3(11) | 35.1(8)  | 43.5(8)  | 17.0(7)  |
| C(82) | 51(2)    | 60(3)     | 47(2)    | 25(2)    | 21.0(19) | 25(2)    |
| Cl(3) | 78.4(8)  | 49.5(6)   | 93.1(9)  | 20.1(6)  | 59.2(7)  | 13.2(6)  |
| Cl(4) | 95.3(10) | 69.1(8)   | 90.7(9)  | 50.6(7)  | 59.3(8)  | 45.3(7)  |
| Cl(5) | 71.6(8)  | 106.8(10) | 45.5(6)  | 24.7(6)  | 29.9(6)  | 42.3(7)  |
| Cl(6) | 43.1(8)  | 43.9(8)   | 49.8(9)  | 23.6(6)  | 13.2(6)  | 12.4(6)  |
| Cl(7) | 40.5(10) | 78.3(16)  | 156(2)   | 36.5(15) | 4.9(12)  | 17.9(10) |
| Cl(8) | 224(4)   | 76.5(15)  | 43.0(11) | 10.0(9)  | 27.9(15) | 74(2)    |

6d. Table 5. Hydrogen coordinates ( $\times 10^4$ ) and isotropic displacement parameters ( $\text{\AA}^2 \times 10^{-3}$ ).

|        | x        | y        | z        | U(eq)  |
|--------|----------|----------|----------|--------|
| H(02)  | 1260(30) | 1419(19) | 480(20)  | 39(11) |
| H(4)   | -758     | 1472     | 196      | 41     |
| H(5)   | -1932    | 2177     | -258     | 48     |
| H(6)   | -1298    | 3392     | -512     | 45     |
| H(7)   | 501      | 3834     | -388     | 38     |
| H(8)   | 2941     | 2093     | 1022     | 28     |
| H(9A)  | 2284     | 4075     | -395     | 42     |
| H(9B)  | 1701     | 3136     | -1079    | 42     |
| H(9C)  | 2978     | 3439     | -589     | 42     |
| H(11)  | 4094     | 3399     | 216      | 29     |
| H(12A) | 4766     | 3707     | 1573     | 35     |
| H(12B) | 4581     | 2701     | 1390     | 35     |
| H(13A) | 6035     | 3720     | 947      | 43     |
| H(13B) | 6423     | 3398     | 1637     | 43     |
| H(14A) | 5730     | 1955     | 742      | 47     |
| H(14B) | 6571     | 2495     | 497      | 47     |
| H(15A) | 5141     | 2581     | -475     | 44     |
| H(15B) | 4946     | 1587     | -606     | 44     |
| H(16A) | 3635     | 1608     | -43      | 34     |
| H(16B) | 3314     | 1967     | -714     | 34     |
| H(02') | 2940(30) | 4650(20) | 8629(19) | 40(11) |
| H(4')  | 1699     | 5453     | 9028     | 52     |
| H(5')  | -95      | 5423     | 8759     | 68     |

|         |          |          |          |       |
|---------|----------|----------|----------|-------|
| H(6')   | -1491    | 4321     | 7688     | 73    |
| H(7')   | -1126    | 3161     | 6911     | 52    |
| H(8')   | 3364     | 3683     | 7857     | 28    |
| H(9'1)  | -323     | 1906     | 6087     | 51    |
| H(9'2)  | -708     | 2025     | 6806     | 51    |
| H(9'3)  | 183      | 1547     | 6727     | 51    |
| H(02'') | 8300(30) | 9930(20) | 5498(18) | 17(8) |
| H(4'')  | 7033     | 10444    | 4597     | 39    |
| H(5'')  | 5730     | 11134    | 4505     | 51    |
| H(6'')  | 5088     | 11562    | 5500     | 58    |
| H(7'')  | 5852     | 11396    | 6655     | 52    |
| H(8'')  | 8663     | 9413     | 6366     | 26    |
| H(9''1) | 7278     | 11120    | 8070     | 66    |
| H(9''2) | 7223     | 11808    | 7677     | 66    |
| H(9''3) | 8371     | 11721    | 8109     | 66    |
| H(102)  | 2676     | 4072     | 4452     | 24    |
| H(104)  | 4516     | 6383     | 6189     | 23    |
| H(106)  | 4413     | 5913     | 3998     | 24    |
| H(22)   | 3124     | 5172     | 2773     | 25    |
| H(23)   | 2786     | 4235     | 1516     | 27    |
| H(25)   | 2702     | 2262     | 2226     | 28    |
| H(26)   | 3055     | 3195     | 3485     | 27    |
| H(32)   | 1686     | 4135     | 5281     | 27    |
| H(33)   | 1311     | 3559     | 6148     | 29    |
| H(35)   | 4356     | 4883     | 7719     | 27    |
| H(36)   | 4733     | 5481     | 6865     | 25    |
| H(42)   | 4938     | 7784     | 6279     | 26    |
| H(43)   | 6288     | 9109     | 6767     | 27    |
| H(45)   | 7487     | 8115     | 5130     | 25    |
| H(46)   | 6147     | 6802     | 4646     | 25    |
| H(61')  | 1565     | 1651     | 6567     | 30    |
| H(62A)  | 2781     | 2437     | 6178     | 39    |
| H(62B)  | 3707     | 2793     | 7029     | 39    |
| H(63A)  | 3964     | 1582     | 6180     | 47    |
| H(63B)  | 2768     | 1005     | 6000     | 47    |
| H(14')  | 4063     | 735      | 6938     | 45    |
| H(64B)  | 4508     | 1738     | 7499     | 45    |
| H(64A)  | 3322     | 1011     | 7933     | 39    |
| H(65B)  | 2381     | 605      | 7085     | 39    |
| H(65A)  | 2006     | 1783     | 7861     | 32    |
| H(66B)  | 3203     | 2406     | 8104     | 32    |
| H(71)   | 8755     | 10540    | 8221     | 33    |
| H(72A)  | 8069     | 9037     | 7716     | 38    |
| H(72B)  | 8853     | 8940     | 7237     | 38    |
| H(73A)  | 9576     | 9618     | 8904     | 48    |
| H(73B)  | 9602     | 8701     | 8376     | 48    |
| H(74A)  | 11356    | 9726     | 8917     | 53    |
| H(74B)  | 10904    | 9396     | 7987     | 53    |
| H(75A)  | 11638    | 10904    | 8537     | 49    |
| H(75B)  | 10864    | 10981    | 9024     | 49    |
| H(76A)  | 10103    | 11297    | 7948     | 42    |
| H(76B)  | 10161    | 10427    | 7366     | 42    |
| H(81A)  | 2062     | -4254    | 4388     | 53    |
| H(81B)  | 939      | -4129    | 3962     | 53    |
| H(81C)  | 1500     | -3296    | 5644     | 140   |
| H(81D)  | 2286     | -3837    | 5419     | 140   |
| H(82)   | 5441     | -8644    | 1969     | 60    |
| H(83)   | 8773     | 2934     | 2905     | 60    |
| H(83')  | 8525     | 2679     | 2298     | 192   |

---

6d. Table 6. Torsion angles [°].

|                          |           |                             |           |
|--------------------------|-----------|-----------------------------|-----------|
| C(8)-N(1)-C(1)-C(2)      | -2.3(4)   | C(5')-C(6')-C(7')-C(2')     | -2.4(7)   |
| C(11)-N(1)-C(1)-C(2)     | 175.0(3)  | C(3')-C(2')-C(7')-C(6')     | -1.4(6)   |
| C(8)-N(1)-C(1)-C(9)      | -176.5(3) | C(1')-C(2')-C(7')-C(6')     | 167.7(4)  |
| C(11)-N(1)-C(1)-C(9)     | 0.9(4)    | C(3')-N(2')-C(8')-N(1')     | -42.5(4)  |
| N(1)-C(1)-C(2)-C(7)      | 165.6(3)  | C(3')-N(2')-C(8')-C(34)     | 82.4(3)   |
| C(9)-C(1)-C(2)-C(7)      | -20.1(4)  | C(1')-N(1')-C(8')-N(2')     | 36.9(3)   |
| N(1)-C(1)-C(2)-C(3)      | -24.5(4)  | C(61')-N(1')-C(8')-N(2')    | -141.4(3) |
| C(9)-C(1)-C(2)-C(3)      | 149.8(3)  | C(1')-N(1')-C(8')-C(34)     | -89.6(3)  |
| C(8)-N(2)-C(3)-C(4)      | -158.2(3) | C(61')-N(1')-C(8')-C(34)    | 92.1(3)   |
| C(8)-N(2)-C(3)-C(2)      | 25.5(4)   | C(8'')-N(1'')-C(1'')-C(2'') | -5.4(4)   |
| C(7)-C(2)-C(3)-N(2)      | -176.9(3) | C(71)-N(1'')-C(1'')-C(2'')  | 171.5(3)  |
| C(1)-C(2)-C(3)-N(2)      | 12.8(4)   | C(8'')-N(1'')-C(1'')-C(9'') | -179.0(3) |
| C(7)-C(2)-C(3)-C(4)      | 6.6(4)    | C(71)-N(1'')-C(1'')-C(9'')  | -2.2(5)   |
| C(1)-C(2)-C(3)-C(4)      | -163.7(3) | N(1'')-C(1'')-C(2'')-C(3'') | -22.3(4)  |
| N(2)-C(3)-C(4)-C(5)      | 176.8(3)  | C(9'')-C(1'')-C(2'')-C(3'') | 151.4(3)  |
| C(2)-C(3)-C(4)-C(5)      | -6.9(5)   | N(1'')-C(1'')-C(2'')-C(7'') | 168.5(3)  |
| C(3)-C(4)-C(5)-C(6)      | 2.3(5)    | C(9'')-C(1'')-C(2'')-C(7'') | -17.8(5)  |
| C(4)-C(5)-C(6)-C(7)      | 2.8(5)    | C(8'')-N(2'')-C(3'')-C(4'') | -159.4(3) |
| C(5)-C(6)-C(7)-C(2)      | -3.1(5)   | C(8'')-N(2'')-C(3'')-C(2'') | 24.2(4)   |
| C(3)-C(2)-C(7)-C(6)      | -1.5(5)   | C(7'')-C(2'')-C(3'')-N(2'') | -177.3(3) |
| C(1)-C(2)-C(7)-C(6)      | 168.2(3)  | C(1'')-C(2'')-C(3'')-N(2'') | 12.9(4)   |
| C(3)-N(2)-C(8)-N(1)      | -49.7(4)  | C(7'')-C(2'')-C(3'')-C(4'') | 6.1(5)    |
| C(3)-N(2)-C(8)-C(24)     | 75.0(3)   | C(1'')-C(2'')-C(3'')-C(4'') | -163.7(3) |
| C(1)-N(1)-C(8)-N(2)      | 37.4(4)   | N(2'')-C(3'')-C(4'')-C(5'') | 177.1(3)  |
| C(11)-N(1)-C(8)-N(2)     | -140.2(3) | C(2'')-C(3'')-C(4'')-C(5'') | -6.5(5)   |
| C(1)-N(1)-C(8)-C(24)     | -87.6(3)  | C(3'')-C(4'')-C(5'')-C(6'') | 1.9(6)    |
| C(11)-N(1)-C(8)-C(24)    | 94.9(3)   | C(4'')-C(5'')-C(6'')-C(7'') | 3.0(6)    |
| C(1)-N(1)-C(11)-C(16)    | -91.9(3)  | C(5'')-C(6'')-C(7'')-C(2'') | -3.3(6)   |
| C(8)-N(1)-C(11)-C(16)    | 85.5(3)   | C(3'')-C(2'')-C(7'')-C(6'') | -1.2(5)   |
| C(1)-N(1)-C(11)-C(12)    | 143.8(3)  | C(1'')-C(2'')-C(7'')-C(6'') | 167.9(4)  |
| C(8)-N(1)-C(11)-C(12)    | -38.8(3)  | C(3'')-N(2'')-C(8'')-N(1'') | -49.1(3)  |
| N(1)-C(11)-C(12)-C(13)   | -177.2(3) | C(3'')-N(2'')-C(8'')-C(44)  | 75.7(3)   |
| C(16)-C(11)-C(12)-C(13)  | 59.2(3)   | C(1'')-N(1'')-C(8'')-N(2'') | 38.9(4)   |
| C(11)-C(12)-C(13)-C(14)  | -59.3(4)  | C(71)-N(1'')-C(8'')-N(2'')  | -138.2(3) |
| C(12)-C(13)-C(14)-C(15)  | 57.6(4)   | C(1'')-N(1'')-C(8'')-C(44)  | -86.8(3)  |
| C(13)-C(14)-C(15)-C(16)  | -54.9(4)  | C(71)-N(1'')-C(8'')-C(44)   | 96.1(3)   |
| C(14)-C(15)-C(16)-C(11)  | 54.3(4)   | C(106)-C(101)-C(102)-C(103) | -0.6(5)   |
| N(1)-C(11)-C(16)-C(15)   | 178.0(2)  | C(21)-C(101)-C(102)-C(103)  | 174.9(3)  |
| C(12)-C(11)-C(16)-C(15)  | -57.1(3)  | C(101)-C(102)-C(103)-C(104) | 0.7(4)    |
| C(8')-N(1')-C(1')-C(2')  | -9.1(4)   | C(101)-C(102)-C(103)-C(31)  | -175.5(3) |
| C(61')-N(1')-C(1')-C(2') | 169.1(3)  | C(102)-C(103)-C(104)-C(105) | -0.5(4)   |
| C(8')-N(1')-C(1')-C(9')  | 173.9(3)  | C(31)-C(103)-C(104)-C(105)  | 175.6(3)  |
| C(61')-N(1')-C(1')-C(9') | -8.0(4)   | C(103)-C(104)-C(105)-C(106) | 0.3(4)    |
| N(1')-C(1')-C(2')-C(7')  | 174.2(3)  | C(103)-C(104)-C(105)-C(41)  | -175.5(3) |
| C(9')-C(1')-C(2')-C(7')  | -8.7(5)   | C(102)-C(101)-C(106)-C(105) | 0.4(4)    |
| N(1')-C(1')-C(2')-C(3')  | -16.6(4)  | C(21)-C(101)-C(106)-C(105)  | -175.2(3) |
| C(9')-C(1')-C(2')-C(3')  | 160.5(3)  | C(104)-C(105)-C(106)-C(101) | -0.2(4)   |
| C(8')-N(2')-C(3')-C(2')  | 19.8(4)   | C(41)-C(105)-C(106)-C(101)  | 175.6(3)  |
| C(8')-N(2')-C(3')-C(4')  | -164.0(3) | C(106)-C(101)-C(21)-C(22)   | -31.7(4)  |
| C(7')-C(2')-C(3')-N(2')  | -179.0(3) | C(102)-C(101)-C(21)-C(22)   | 152.8(3)  |
| C(1')-C(2')-C(3')-N(2')  | 11.5(4)   | C(106)-C(101)-C(21)-C(26)   | 143.2(3)  |
| C(7')-C(2')-C(3')-C(4')  | 4.7(5)    | C(102)-C(101)-C(21)-C(26)   | -32.2(4)  |
| C(1')-C(2')-C(3')-C(4')  | -164.8(3) | C(26)-C(21)-C(22)-C(23)     | -1.6(4)   |
| N(2')-C(3')-C(4')-C(5')  | 179.5(4)  | C(101)-C(21)-C(22)-C(23)    | 173.4(3)  |
| C(2')-C(3')-C(4')-C(5')  | -4.4(5)   | C(21)-C(22)-C(23)-C(24)     | 1.0(5)    |
| C(3')-C(4')-C(5')-C(6')  | 0.6(7)    | C(22)-C(23)-C(24)-C(25)     | -0.1(5)   |
| C(4')-C(5')-C(6')-C(7')  | 2.8(8)    | C(22)-C(23)-C(24)-C(8)      | -179.7(3) |

|                           |           |                             |           |
|---------------------------|-----------|-----------------------------|-----------|
| N(2)-C(8)-C(24)-C(23)     | -103.6(3) | C(8')-N(1')-C(61')-C(62')   | -41.3(3)  |
| N(1)-C(8)-C(24)-C(23)     | 19.7(4)   | N(1')-C(61')-C(62')-C(63')  | -179.2(3) |
| N(2)-C(8)-C(24)-C(25)     | 76.8(3)   | C(66')-C(61')-C(62')-C(63') | 58.1(4)   |
| N(1)-C(8)-C(24)-C(25)     | -160.0(3) | C(61')-C(62')-C(63')-C(64') | -59.5(4)  |
| C(23)-C(24)-C(25)-C(26)   | -0.3(5)   | C(62')-C(63')-C(64')-C(65') | 59.1(4)   |
| C(8)-C(24)-C(25)-C(26)    | 179.4(3)  | C(63')-C(64')-C(65')-C(66') | -55.5(4)  |
| C(24)-C(25)-C(26)-C(21)   | -0.4(5)   | N(1')-C(61')-C(66')-C(65')  | 179.6(2)  |
| C(22)-C(21)-C(26)-C(25)   | 1.3(4)    | C(62')-C(61')-C(66')-C(65') | -55.8(3)  |
| C(101)-C(21)-C(26)-C(25)  | -173.8(3) | C(64')-C(65')-C(66')-C(61') | 54.0(4)   |
| C(102)-C(103)-C(31)-C(32) | -36.9(4)  | C(1'')-N(1'')-C(71)-C(76)   | -98.6(4)  |
| C(104)-C(103)-C(31)-C(32) | 147.0(3)  | C(8'')-N(1'')-C(71)-C(76)   | 78.3(3)   |
| C(102)-C(103)-C(31)-C(36) | 139.2(3)  | C(1'')-N(1'')-C(71)-C(72)   | 136.8(3)  |
| C(104)-C(103)-C(31)-C(36) | -36.9(4)  | C(8'')-N(1'')-C(71)-C(72)   | -46.2(3)  |
| C(36)-C(31)-C(32)-C(33)   | -1.4(5)   | N(1'')-C(71)-C(72)-C(73)    | 176.1(3)  |
| C(103)-C(31)-C(32)-C(33)  | 174.8(3)  | C(76)-C(71)-C(72)-C(73)     | 53.3(4)   |
| C(31)-C(32)-C(33)-C(34)   | -0.3(5)   | C(71)-C(72)-C(73)-C(74)     | -57.2(4)  |
| C(32)-C(33)-C(34)-C(35)   | 1.4(5)    | C(72)-C(73)-C(74)-C(75)     | 59.1(4)   |
| C(32)-C(33)-C(34)-C(8')   | -176.3(3) | C(73)-C(74)-C(75)-C(76)     | -57.2(4)  |
| N(2')-C(8')-C(34)-C(35)   | 82.6(4)   | N(1'')-C(71)-C(76)-C(75)    | -174.9(3) |
| N(1')-C(8')-C(34)-C(35)   | -153.2(3) | C(72)-C(71)-C(76)-C(75)     | -51.1(4)  |
| N(2')-C(8')-C(34)-C(33)   | -99.6(4)  | C(74)-C(75)-C(76)-C(71)     | 53.3(4)   |
| N(1')-C(8')-C(34)-C(33)   | 24.5(4)   | O(1)-S(1)-C(97)-F(3)        | 179.8(3)  |
| C(33)-C(34)-C(35)-C(36)   | -0.8(5)   | O(2)-S(1)-C(97)-F(3)        | 60.1(3)   |
| C(8')-C(34)-C(35)-C(36)   | 177.1(3)  | O(3)-S(1)-C(97)-F(3)        | -60.1(3)  |
| C(34)-C(35)-C(36)-C(31)   | -0.8(5)   | O(1)-S(1)-C(97)-F(1)        | 59.5(3)   |
| C(32)-C(31)-C(36)-C(35)   | 1.9(5)    | O(2)-S(1)-C(97)-F(1)        | -60.3(3)  |
| C(103)-C(31)-C(36)-C(35)  | -174.3(3) | O(3)-S(1)-C(97)-F(1)        | 179.6(2)  |
| C(104)-C(105)-C(41)-C(42) | -33.5(4)  | O(1)-S(1)-C(97)-F(2)        | -60.1(3)  |
| C(106)-C(105)-C(41)-C(42) | 150.8(3)  | O(2)-S(1)-C(97)-F(2)        | -179.8(2) |
| C(104)-C(105)-C(41)-C(46) | 143.7(3)  | O(3)-S(1)-C(97)-F(2)        | 60.1(3)   |
| C(106)-C(105)-C(41)-C(46) | -32.0(4)  | O(6)-S(2)-C(98)-F(5)        | 64.0(3)   |
| C(46)-C(41)-C(42)-C(43)   | -1.0(4)   | O(5)-S(2)-C(98)-F(5)        | -175.0(3) |
| C(105)-C(41)-C(42)-C(43)  | 176.3(3)  | O(4)-S(2)-C(98)-F(5)        | -56.8(3)  |
| C(41)-C(42)-C(43)-C(44)   | 0.2(5)    | O(6)-S(2)-C(98)-F(6)        | -57.1(4)  |
| C(42)-C(43)-C(44)-C(45)   | 0.7(4)    | O(5)-S(2)-C(98)-F(6)        | 63.9(4)   |
| C(42)-C(43)-C(44)-C(8'')  | -177.8(3) | O(4)-S(2)-C(98)-F(6)        | -177.9(3) |
| N(2'')-C(8'')-C(44)-C(45) | 67.5(4)   | O(6)-S(2)-C(98)-F(4)        | -177.2(3) |
| N(1'')-C(8'')-C(44)-C(45) | -169.4(3) | O(5)-S(2)-C(98)-F(4)        | -56.1(3)  |
| N(2'')-C(8'')-C(44)-C(43) | -114.0(3) | O(4)-S(2)-C(98)-F(4)        | 62.0(3)   |
| N(1'')-C(8'')-C(44)-C(43) | 9.1(4)    | O(9)-S(3)-C(99)-F(7)        | -59.9(3)  |
| C(43)-C(44)-C(45)-C(46)   | -0.6(4)   | O(7)-S(3)-C(99)-F(7)        | 60.8(3)   |
| C(8'')-C(44)-C(45)-C(46)  | 177.9(3)  | O(8)-S(3)-C(99)-F(7)        | -179.7(3) |
| C(44)-C(45)-C(46)-C(41)   | -0.2(4)   | O(9)-S(3)-C(99)-F(9)        | -179.4(3) |
| C(42)-C(41)-C(46)-C(45)   | 1.1(4)    | O(7)-S(3)-C(99)-F(9)        | -58.7(3)  |
| C(105)-C(41)-C(46)-C(45)  | -176.3(3) | O(8)-S(3)-C(99)-F(9)        | 60.8(3)   |
| C(1')-N(1')-C(61')-C(66') | -95.2(3)  | O(9)-S(3)-C(99)-F(8)        | 60.8(3)   |
| C(8')-N(1')-C(61')-C(66') | 83.0(3)   | O(7)-S(3)-C(99)-F(8)        | -178.5(3) |
| C(1')-N(1')-C(61')-C(62') | 140.5(3)  | O(8)-S(3)-C(99)-F(8)        | -59.0(3)  |

6d. Table 7. Hydrogen bonds [ $\text{\AA}$  and  $^\circ$ ].

| D-H...A                 | d(D-H)  | d(H...A) | d(D...A) | $\angle(\text{DHA})$ |
|-------------------------|---------|----------|----------|----------------------|
| N(2)-H(02)...O(8)       | 0.84(3) | 2.18(3)  | 2.930(4) | 148(4)               |
| N(2')-H(02')...O(3)     | 0.84(3) | 2.31(3)  | 3.066(3) | 150(4)               |
| N(2'')-H(02'')...O(6)   | 0.83(3) | 2.38(3)  | 3.023(4) | 135(3)               |
| N(2'')-H(02'')...O(4)#1 | 0.83(3) | 2.50(3)  | 3.171(4) | 139(3)               |

Symmetry transformations used to generate equivalent atoms: #1 -x+2,-y+2,-z+1

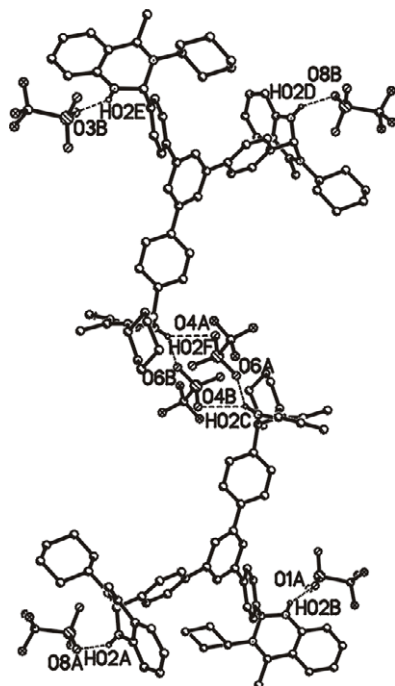

View of the dimers formed in **6d** through N-H...O hydrogen bonding



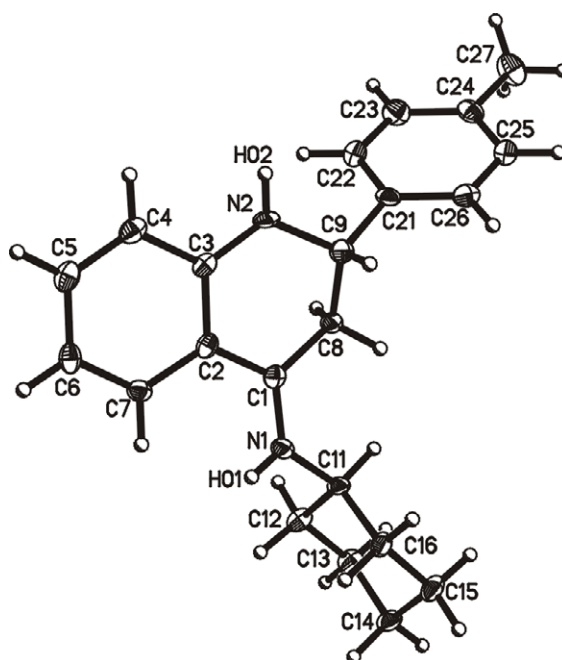

Table 1. Crystal data and structure refinement of **7d2**.

|                                   |                                                                                                |                            |
|-----------------------------------|------------------------------------------------------------------------------------------------|----------------------------|
| Identification code               | ajf44bs                                                                                        |                            |
| Empirical formula                 | C <sub>24</sub> H <sub>28</sub> Cl <sub>3</sub> F <sub>3</sub> N <sub>2</sub> O <sub>3</sub> S |                            |
| Formula weight                    | 587.89                                                                                         |                            |
| Temperature                       | 100(2) K                                                                                       |                            |
| Wavelength                        | 0.71073 Å                                                                                      |                            |
| Crystal system                    | Monoclinic                                                                                     |                            |
| Space group                       | P 2(1)/n                                                                                       |                            |
| Unit cell dimensions              | a = 11.8166(17) Å                                                                              | $\alpha = 90^\circ$        |
|                                   | b = 16.328(2) Å                                                                                | $\beta = 102.356(3)^\circ$ |
|                                   | c = 13.928(2) Å                                                                                | $\gamma = 90^\circ$        |
| Volume                            | 2625.0(7) Å <sup>3</sup>                                                                       |                            |
| Z                                 | 4                                                                                              |                            |
| Density (calculated)              | 1.488 Mg/m <sup>3</sup>                                                                        |                            |
| Absorption coefficient            | 0.480 mm <sup>-1</sup>                                                                         |                            |
| F(000)                            | 1216                                                                                           |                            |
| Crystal size                      | 0.22 x 0.11 x 0.01 mm <sup>3</sup>                                                             |                            |
| Theta range for data collection   | 1.95 to 28.75°                                                                                 |                            |
| Index ranges                      | -15 ≤ h ≤ 15, -21 ≤ k ≤ 21, -18 ≤ l ≤ 17                                                       |                            |
| Reflections collected             | 31789                                                                                          |                            |
| Independent reflections           | 6412 [R(int) = 0.0734]                                                                         |                            |
| Completeness to theta = 27.00°    | 100.0 %                                                                                        |                            |
| Absorption correction             | Semi-empirical from equivalents                                                                |                            |
| Max. and min. transmission        | 0.9952 and 0.8720                                                                              |                            |
| Refinement method                 | Full-matrix least-squares on F <sup>2</sup>                                                    |                            |
| Data / restraints / parameters    | 6412 / 25 / 350                                                                                |                            |
| Goodness-of-fit on F <sup>2</sup> | 1.242                                                                                          |                            |
| Final R indices [I > 2σ(I)]       | R1 = 0.0959, wR2 = 0.1528                                                                      |                            |
| R indices (all data)              | R1 = 0.1243, wR2 = 0.1627                                                                      |                            |
| Largest diff. peak and hole       | 0.720 and -0.455 e.Å <sup>-3</sup>                                                             |                            |

**7d2.** Table 2. Atomic coordinates ( $\times 10^4$ ) and equivalent isotropic displacement parameters ( $\text{\AA}^2 \times 10^3$ ). U(eq) is defined as one third of the trace of the orthogonalized U<sub>ij</sub> tensor.

|        | x         | y          | z         | U(eq)    |
|--------|-----------|------------|-----------|----------|
| N(1)   | 4304(3)   | 4906(2)    | 2609(2)   | 18.2(7)  |
| C(1)   | 5040(3)   | 4426(2)    | 3168(3)   | 15.1(7)  |
| C(2)   | 5798(3)   | 4720(2)    | 4052(3)   | 15.7(7)  |
| C(3)   | 6517(3)   | 4146(2)    | 4662(3)   | 15.2(7)  |
| N(2)   | 6448(3)   | 3332(2)    | 4479(2)   | 19.9(7)  |
| C(4)   | 7352(3)   | 4441(2)    | 5471(3)   | 20.4(8)  |
| C(5)   | 7450(3)   | 5263(2)    | 5659(3)   | 20.9(8)  |
| C(6)   | 6735(3)   | 5835(2)    | 5069(3)   | 19.0(8)  |
| C(7)   | 5929(3)   | 5563(2)    | 4282(3)   | 16.9(7)  |
| C(8)   | 5175(3)   | 3556(2)    | 2878(3)   | 16.5(7)  |
| C(9)   | 5497(3)   | 2979(2)    | 3761(3)   | 18.4(8)  |
| C(11)  | 3584(3)   | 4747(2)    | 1624(3)   | 17.3(8)  |
| C(12)  | 3961(3)   | 5330(3)    | 894(3)    | 21.1(8)  |
| C(13)  | 3173(3)   | 5245(3)    | -119(3)   | 22.2(8)  |
| C(14)  | 1911(3)   | 5400(2)    | -75(3)    | 20.2(8)  |
| C(15)  | 1541(3)   | 4798(3)    | 635(3)    | 21.9(8)  |
| C(16)  | 2314(3)   | 4868(2)    | 1660(3)   | 18.4(8)  |
| C(21)  | 5825(3)   | 2154(2)    | 3406(3)   | 17.0(8)  |
| C(22)  | 6943(3)   | 2009(2)    | 3267(3)   | 24.0(9)  |
| C(23)  | 7212(3)   | 1279(2)    | 2864(3)   | 24.7(9)  |
| C(24)  | 6386(3)   | 676(2)     | 2570(3)   | 20.7(8)  |
| C(25)  | 5274(3)   | 827(2)     | 2716(3)   | 22.0(8)  |
| C(26)  | 4993(3)   | 1549(2)    | 3127(3)   | 20.9(8)  |
| C(27)  | 6684(4)   | -107(3)    | 2106(3)   | 30.9(10) |
| C(98)  | 5611(5)   | 2368(4)    | -60(5)    | 26.2(18) |
| Cl(1)  | 6875(2)   | 2596.4(16) | 723(3)    | 36.2(7)  |
| Cl(2)  | 5130(3)   | 1351.0(18) | -55(3)    | 30.9(9)  |
| Cl(3)  | 4510(2)   | 3077(2)    | 40(3)     | 33.8(7)  |
| C(98') | 5397(7)   | 2190(6)    | 649(8)    | 20(3)    |
| Cl(1') | 6747(5)   | 2475(4)    | 943(4)    | 27.4(13) |
| Cl(2') | 5109(10)  | 1316(6)    | -57(11)   | 88(4)    |
| Cl(3') | 4371(6)   | 2923(4)    | 225(5)    | 37.2(18) |
| C(99)  | 200(3)    | 2854(2)    | 1874(3)   | 23.8(9)  |
| F(1)   | -330(2)   | 2663.0(17) | 959(2)    | 40.7(7)  |
| F(2)   | -446(2)   | 2560.6(17) | 2465(2)   | 45.8(7)  |
| F(3)   | 209(2)    | 3665.8(14) | 1956(2)   | 36.8(7)  |
| S(1)   | 1663.9(8) | 2428.0(6)  | 2170.6(7) | 17.9(2)  |
| O(1)   | 2138(3)   | 2753(2)    | 3129(2)   | 44.6(9)  |
| O(2)   | 1436(3)   | 1558.1(16) | 2138(2)   | 30.2(7)  |
| O(3)   | 2182(2)   | 2718.1(17) | 1396(2)   | 27.9(7)  |

**7d2.** Table 3. Bond lengths [ $\text{\AA}$ ] and angles [ $^\circ$ ].

|            |          |             |          |
|------------|----------|-------------|----------|
| N(1)-C(1)  | 1.299(5) | C(6)-C(7)   | 1.363(5) |
| N(1)-C(11) | 1.475(5) | C(8)-C(9)   | 1.530(5) |
| C(1)-C(2)  | 1.441(5) | C(9)-C(21)  | 1.515(5) |
| C(1)-C(8)  | 1.494(5) | C(11)-C(16) | 1.525(5) |
| C(2)-C(7)  | 1.415(5) | C(11)-C(12) | 1.526(5) |
| C(2)-C(3)  | 1.418(5) | C(12)-C(13) | 1.522(5) |
| C(3)-N(2)  | 1.352(5) | C(13)-C(14) | 1.526(5) |
| C(3)-C(4)  | 1.415(5) | C(14)-C(15) | 1.523(5) |
| N(2)-C(9)  | 1.453(5) | C(15)-C(16) | 1.526(5) |
| C(4)-C(5)  | 1.367(6) | C(21)-C(26) | 1.388(5) |
| C(5)-C(6)  | 1.401(5) | C(21)-C(22) | 1.396(5) |

|                 |           |                      |            |
|-----------------|-----------|----------------------|------------|
| C(22)-C(23)     | 1.384(6)  | C(21)-C(9)-C(8)      | 108.8(3)   |
| C(23)-C(24)     | 1.384(5)  | N(1)-C(11)-C(16)     | 108.8(3)   |
| C(24)-C(25)     | 1.394(5)  | N(1)-C(11)-C(12)     | 108.5(3)   |
| C(24)-C(27)     | 1.508(5)  | C(16)-C(11)-C(12)    | 111.8(3)   |
| C(25)-C(26)     | 1.381(5)  | C(13)-C(12)-C(11)    | 110.7(3)   |
| C(98)-Cl(1)     | 1.692(6)  | C(12)-C(13)-C(14)    | 110.9(3)   |
| C(98)-Cl(2)     | 1.756(6)  | C(15)-C(14)-C(13)    | 109.8(3)   |
| C(98)-Cl(3)     | 1.770(6)  | C(14)-C(15)-C(16)    | 111.2(3)   |
| C(98')-Cl(1')   | 1.627(9)  | C(11)-C(16)-C(15)    | 110.8(3)   |
| C(98')-Cl(3')   | 1.717(9)  | C(26)-C(21)-C(22)    | 118.4(3)   |
| C(98')-Cl(2')   | 1.725(11) | C(26)-C(21)-C(9)     | 120.6(3)   |
| C(99)-F(2)      | 1.327(5)  | C(22)-C(21)-C(9)     | 120.7(3)   |
| C(99)-F(3)      | 1.330(4)  | C(23)-C(22)-C(21)    | 120.5(4)   |
| C(99)-F(1)      | 1.332(5)  | C(22)-C(23)-C(24)    | 121.6(4)   |
| C(99)-S(1)      | 1.828(4)  | C(23)-C(24)-C(25)    | 117.2(4)   |
| S(1)-O(3)       | 1.430(3)  | C(23)-C(24)-C(27)    | 121.0(4)   |
| S(1)-O(1)       | 1.434(3)  | C(25)-C(24)-C(27)    | 121.7(4)   |
| S(1)-O(2)       | 1.445(3)  | C(26)-C(25)-C(24)    | 121.9(4)   |
|                 |           | C(25)-C(26)-C(21)    | 120.3(4)   |
| C(1)-N(1)-C(11) | 129.0(3)  | Cl(1)-C(98)-Cl(2)    | 116.6(4)   |
| N(1)-C(1)-C(2)  | 121.6(3)  | Cl(1)-C(98)-Cl(3)    | 111.5(3)   |
| N(1)-C(1)-C(8)  | 120.6(3)  | Cl(2)-C(98)-Cl(3)    | 111.9(3)   |
| C(2)-C(1)-C(8)  | 117.7(3)  | Cl(1')-C(98')-Cl(3') | 118.0(6)   |
| C(7)-C(2)-C(3)  | 119.0(3)  | Cl(1')-C(98')-Cl(2') | 116.3(7)   |
| C(7)-C(2)-C(1)  | 122.4(3)  | Cl(3')-C(98')-Cl(2') | 110.0(6)   |
| C(3)-C(2)-C(1)  | 118.3(3)  | F(2)-C(99)-F(3)      | 107.5(3)   |
| N(2)-C(3)-C(4)  | 119.2(3)  | F(2)-C(99)-F(1)      | 107.1(3)   |
| N(2)-C(3)-C(2)  | 122.1(3)  | F(3)-C(99)-F(1)      | 108.0(3)   |
| C(4)-C(3)-C(2)  | 118.6(3)  | F(2)-C(99)-S(1)      | 111.4(3)   |
| C(3)-N(2)-C(9)  | 121.7(3)  | F(3)-C(99)-S(1)      | 111.8(3)   |
| C(5)-C(4)-C(3)  | 120.2(4)  | F(1)-C(99)-S(1)      | 110.9(3)   |
| C(4)-C(5)-C(6)  | 121.8(4)  | O(3)-S(1)-O(1)       | 115.8(2)   |
| C(7)-C(6)-C(5)  | 118.9(4)  | O(3)-S(1)-O(2)       | 114.17(18) |
| C(6)-C(7)-C(2)  | 121.5(3)  | O(1)-S(1)-O(2)       | 115.2(2)   |
| C(1)-C(8)-C(9)  | 113.0(3)  | O(3)-S(1)-C(99)      | 103.94(18) |
| N(2)-C(9)-C(21) | 111.3(3)  | O(1)-S(1)-C(99)      | 103.4(2)   |
| N(2)-C(9)-C(8)  | 109.4(3)  | O(2)-S(1)-C(99)      | 101.89(18) |

**7d2.** Table 4. Anisotropic displacement parameters ( $\text{\AA}^2 \times 10^3$ ). The anisotropic displacement factor exponent takes the form:  $-2\pi^2 [h^2 a^{*2} U^{11} + \dots + 2 h k a^* b^* U^{12}]$

|       | U <sup>11</sup> | U <sup>22</sup> | U <sup>33</sup> | U <sup>23</sup> | U <sup>13</sup> | U <sup>12</sup> |
|-------|-----------------|-----------------|-----------------|-----------------|-----------------|-----------------|
| N(1)  | 19.6(15)        | 13.6(16)        | 19.4(17)        | -3.0(13)        | -0.1(13)        | 3.8(13)         |
| C(1)  | 11.6(16)        | 17.7(18)        | 17.7(18)        | 1.8(14)         | 6.9(14)         | -1.7(14)        |
| C(2)  | 13.1(16)        | 20.4(19)        | 13.9(17)        | -1.5(14)        | 3.4(14)         | -2.0(14)        |
| C(3)  | 13.6(16)        | 21.3(19)        | 11.1(17)        | 1.4(14)         | 3.3(13)         | -0.7(14)        |
| N(2)  | 22.4(17)        | 17.5(16)        | 15.4(16)        | 4.8(13)         | -5.8(13)        | 5.2(13)         |
| C(4)  | 16.5(18)        | 27(2)           | 17.4(19)        | 4.4(16)         | 2.2(15)         | -1.0(16)        |
| C(5)  | 20.4(18)        | 28(2)           | 14.7(18)        | -1.7(16)        | 4.2(15)         | -4.4(16)        |
| C(6)  | 19.1(18)        | 20.5(19)        | 19.1(19)        | -4.4(16)        | 8.0(15)         | -6.1(15)        |
| C(7)  | 15.7(17)        | 15.7(18)        | 19.6(19)        | 1.3(15)         | 4.4(14)         | 2.3(14)         |
| C(8)  | 18.4(18)        | 15.1(18)        | 14.1(18)        | -0.2(14)        | -0.8(14)        | 1.3(14)         |
| C(9)  | 19.1(18)        | 17.7(19)        | 17.8(19)        | -0.9(15)        | 2.3(15)         | 1.0(15)         |
| C(11) | 18.5(18)        | 15.1(18)        | 14.7(18)        | -2.3(14)        | -4.5(14)        | 4.9(14)         |
| C(12) | 15.0(17)        | 28(2)           | 20(2)           | 0.9(16)         | 3.0(15)         | 1.5(16)         |
| C(13) | 23.2(19)        | 25(2)           | 17.7(19)        | 4.8(16)         | 3.6(15)         | 0.7(17)         |
| C(14) | 17.6(18)        | 23(2)           | 16.9(19)        | 1.8(15)         | -2.5(15)        | 3.6(16)         |
| C(15) | 16.5(18)        | 28(2)           | 19(2)           | 3.3(16)         | -2.8(15)        | -3.7(16)        |

|       |          |          |          |           |           |          |
|-------|----------|----------|----------|-----------|-----------|----------|
| C(16) | 16.0(17) | 20(2)    | 17.5(19) | 1.0(15)   | -0.6(14)  | -3.5(15) |
| C(21) | 22.0(18) | 13.8(18) | 13.3(18) | 3.5(14)   | -0.1(14)  | 4.0(15)  |
| C(22) | 18.5(19) | 24(2)    | 28(2)    | 0.5(17)   | 0.7(16)   | -3.2(16) |
| C(23) | 20.8(19) | 25(2)    | 30(2)    | 1.2(18)   | 9.8(17)   | 3.3(17)  |
| C(24) | 27(2)    | 18.5(19) | 16.7(19) | 3.9(15)   | 6.2(16)   | 1.0(16)  |
| C(25) | 20.0(19) | 21(2)    | 24(2)    | 0.8(16)   | 2.1(16)   | -2.4(16) |
| C(26) | 18.4(18) | 23(2)    | 21(2)    | 3.7(16)   | 4.0(15)   | 3.3(15)  |
| C(27) | 39(2)    | 24(2)    | 34(2)    | -6.5(19)  | 17(2)     | -0.1(19) |
| C(98) | 22(3)    | 27(4)    | 29(4)    | -3(3)     | 4(3)      | 0(3)     |
| Cl(1) | 21.4(10) | 28.3(11) | 61.0(17) | 13.0(11)  | 13.5(10)  | -1.0(7)  |
| Cl(2) | 27.4(11) | 17.3(10) | 50.1(16) | -8.4(7)   | 13.2(8)   | -6.9(6)  |
| Cl(3) | 17.9(10) | 31.3(13) | 48.3(16) | 0.7(13)   | -1.7(10)  | 9.5(9)   |
| C(99) | 20.7(19) | 15.6(19) | 36(2)    | -0.1(17)  | 8.9(17)   | -0.3(15) |
| F(1)  | 26.2(13) | 42.4(16) | 44.2(16) | -2.2(13)  | -13.3(12) | 4.3(12)  |
| F(2)  | 38.9(15) | 39.0(16) | 69(2)    | 6.0(15)   | 32.4(14)  | -4.1(13) |
| F(3)  | 28.2(13) | 17.8(13) | 65.7(19) | -0.9(12)  | 13.2(13)  | 5.3(10)  |
| S(1)  | 18.4(4)  | 13.6(4)  | 19.5(5)  | -1.4(4)   | -1.1(3)   | 0.5(4)   |
| O(1)  | 51(2)    | 42(2)    | 30.3(18) | -11.9(15) | -14.4(15) | 4.5(16)  |
| O(2)  | 33.2(16) | 14.3(14) | 42.1(18) | 2.3(13)   | 6.0(14)   | -1.0(12) |
| O(3)  | 25.0(15) | 20.7(15) | 40.7(18) | 0.9(13)   | 13.1(13)  | -1.7(12) |

7d2. Table 5. Hydrogen coordinates ( $\times 10^4$ ) and isotropic displacement parameters ( $\text{\AA}^2 \times 10^{-3}$ ).

|        | x        | y        | z        | U(eq)  |
|--------|----------|----------|----------|--------|
| H(01)  | 4240(40) | 5360(30) | 2790(30) | 22     |
| H(02)  | 6780(30) | 3020(20) | 4930(20) | 24(12) |
| H(4)   | 7847     | 4068     | 5885     | 24     |
| H(5)   | 8017     | 5451     | 6204     | 25     |
| H(6)   | 6811     | 6403     | 5215     | 23     |
| H(7)   | 5445     | 5949     | 3879     | 20     |
| H(8A)  | 5784     | 3526     | 2489     | 20     |
| H(8B)  | 4440     | 3368     | 2453     | 20     |
| H(9)   | 4812     | 2911     | 4069     | 22     |
| H(11)  | 3705     | 4169     | 1430     | 21     |
| H(12A) | 3935     | 5901     | 1128     | 25     |
| H(12B) | 4769     | 5205     | 853      | 25     |
| H(13A) | 3250     | 4687     | -376     | 27     |
| H(13B) | 3412     | 5642     | -575     | 27     |
| H(14A) | 1822     | 5968     | 146      | 24     |
| H(14B) | 1411     | 5333     | -738     | 24     |
| H(15A) | 1582     | 4233     | 387      | 26     |
| H(15B) | 727      | 4909     | 671      | 26     |
| H(16A) | 2212     | 5415     | 1938     | 22     |
| H(16B) | 2084     | 4450     | 2096     | 22     |
| H(22)  | 7524     | 2416     | 3452     | 29     |
| H(23)  | 7981     | 1189     | 2787     | 30     |
| H(25)  | 4692     | 422      | 2528     | 26     |
| H(26)  | 4228     | 1632     | 3220     | 25     |
| H(27A) | 6865     | 15       | 1467     | 46     |
| H(27B) | 6023     | -483     | 2016     | 46     |
| H(27C) | 7358     | -362     | 2535     | 46     |
| H(98)  | 5763     | 2455     | -732     | 31     |
| H(98') | 5222     | 2023     | 1293     | 24     |

**7d2.** Table 6. Hydrogen bonds [ $\text{\AA}$  and  $^\circ$ ].

| D-H...A             | d(D-H)    | d(H...A) | d(D...A) | $\angle(\text{DHA})$ |
|---------------------|-----------|----------|----------|----------------------|
| N(1)-H(01)...O(2)#1 | 0.79(4)   | 2.12(4)  | 2.880(4) | 160(4)               |
| C(7)-H(7)...O(2)#1  | 0.95      | 2.57     | 3.463(5) | 157.6                |
| N(2)-H(02)...O(3)#2 | 0.840(19) | 2.33(2)  | 3.136(4) | 161(4)               |

Symmetry transformations used to generate equivalent atoms:

#1  $-x+1/2, y+1/2, -z+1/2$  #2  $x+1/2, -y+1/2, z+1/2$

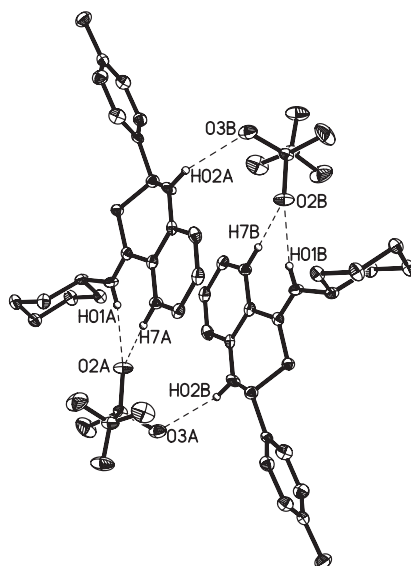

View of the dimers formed in **7d2** through N-H $\cdots$ O and CH $\cdots$ O hydrogen bonding

**Cyclic voltammetry.** *Experimental details:* Square Wave Voltammetry was performed at 297 K using a home-made computer-driven potentiostat-galvanostat. A three-electrode cell was employed in the experiments with a gold ball of radius 0.0113 cm as working electrode. The counter electrode was a Pt foil, and the reference electrode was a saturated calomel electrode (SCE). Nitrogen gas was passed through the solutions for de-aeration for 20 min prior to measurements, with nitrogen atmosphere maintained over the solution during all the experiments. Pulse time 50 ms. Step amplitude 5 mV. Square wave amplitude 50 mV. The results are the mean of the five experimental values. The errors correspond to the standard deviation. Acetonitrile solutions of **3d5** (0.17 mM) and **7d5** (0.182 mmol) with 0.1 M LiClO<sub>4</sub> as supporting electrolyte were used and the cyclic voltammograms were obtained at 100 mVs<sup>-1</sup>. The value of the reduction potential is referenced to the redox couple [Fe(C<sub>5</sub>H<sub>5</sub>)<sub>2</sub>]<sup>+0</sup> ( $E_0^{red} = 320$  mV vs SCE).

## References

- <sup>1</sup> D. Johnston, D. M. Smith, T. Shepherd and D. Thompson, *J. Chem. Soc., Perkin Trans. 1*, 1987, 495.
- <sup>2</sup> W. Borsche, W. Doeller and M. Wagner-Roemmich, *Chem. Ber.*, 1943, **76**, 1099.
- <sup>3</sup> R. M. Porter, S. Winston, A. A. Danopoulos and M. B. Hursthouse, *J. Chem. Soc., Dalton Trans.*, 2002, 3290.
- <sup>4</sup> L. I. Smith and J. W. Opie, *Org. Synth.*, 1948, **28**, 11.
